# Supplementary material for: Quantitative temporal analysis of modified vaccinia Ankara, the monkeypox and smallpox vaccine
Source: Research Square preprint supplement (doi:10.21203/rs.3.rs-1850393/v1), 2022-07-13
Supplement: Supplementary file 1 [file 3faaabd24438a90c572417a8.xlsx]

## Sheet: Data
Protein Id	Protein Id	Uniprot-l	Species	Gene Symbol	Description	M1 Peptides	M2 Peptides	M1 and M2	M1 or M2	V1 Peptides	V2 Peptides	V3 Peptides	VM Peptides	Mock1	MVA1 2h	MVA1 4h	MVA1 8h	MVA1 12h	MVA1 18h	MVA1 + AraC 2h	MVA1 + AraC 4h	MVA1 + AraC 8h	MVA1 + AraC 12h	MVA1 + AraC 18h	MVA1 HI 2h	MVA1 HI 4h	MVA1 HI 8h	MVA1 HI 12h	MVA1 HI 18h	Mock2	MVA2 2h	MVA2 4h	MVA2 8h	MVA2 12h	MVA2 18h	MVA2 + AraC 2h	MVA2 + AraC 4h	MVA2 + AraC 8h	MVA2 + AraC 12h	MVA2 + AraC 18h	MVA2 HI 2h	MVA2 HI 4h	MVA2 HI 8h	MVA2 HI 12h	MVA2 HI 18h	WCL1 0h Mock	WCL1 6h Mock	WCL1 18h Mock	WCL1 2h VACV
sp|P01023|A2MG_HUMAN	sp	P01023	HUMAN	A2M	Alpha-2-macroglobulin	19	19	1	0	12	11	9	10	1320.15	3496.46	2519.09	1742.88	1791.32	1914.04	3529.21	2621.98	1724.39	1531	1745.07	3874.13	3060.05	1675.28	1478.83	1346.28	1051.52	3621.85	2683.46	1851.63	1450.32	1385.6	3425.46	2675.26	1900.41	1426.32	1427.85	3429.23	2785.23	1710.41	1222.22	752.716	3189.34	1908.28	1053.57	3269.9
sp|Q9NRG9|AAAS_HUMAN	sp	Q9NRG9	HUMAN	AAAS	Aladin	7	4	1	0	5	7	4	5	267.426	265.737	275.234	259.483	257.39	250.482	279.084	256.597	262.842	255.177	239.452	295.431	251.067	255.767	274.801	240.265	177.532	149.398	189.118	186.749	181.335	139.889	197.26	182.658	182.382	179.936	163.806	194.928	193.71	176.235	193.325	168.363	862.065	785.432	808.765	784.002
sp|Q86V21|AACS_HUMAN	sp	Q86V21	HUMAN	AACS	Acetoacetyl-CoA synthetase	11	9	1	0	10	18	11	11	1383.75	1235.37	1285.31	1226.7	1219.48	1330.61	1224.11	1256.2	1174.97	1229.37	1263.72	1329.95	1263.35	1255.17	1170.06	1095.37	1223.87	1292.11	1369.48	1276.92	1205.28	1117.94	1281.06	1222.07	1211.24	1255.06	1204.62	1233.09	1214.95	1168.08	1245.28	1088.32	2118.07	1702.06	1732.32	1653.96
sp|Q7RTV5|AAED1_HUMAN	sp	Q7RTV5	HUMAN	AAED1	Thioredoxin-like protein AAED1	2	1	1	0	2	3	3	3	137.84	123.098	118.685	111.365	91.9578	84.7049	122.06	112.531	109.234	87.0545	83.2682	131.349	112.042	89.9668	65.173	63.8479	68.031	63.8923	57.9088	53.0665	53.5825	48.452	61.7592	66.779	54.9425	50.1904	44.9755	65.4883	64.4606	63.5767	73.8557	75.627	290.916	226.799	211.772	234.414
sp|Q6PD74|AAGAB_HUMAN	sp	Q6PD74	HUMAN	AAGAB	Alpha- and gamma-adaptin-binding protein p34	2	5	1	0	6	5	1	3	370.13	371.801	352.24	323.227	313.474	319.006	343.281	349.782	355.052	350.402	362.923	379.247	362.356	239.597	193.036	197.881	239.024	236.244	253.767	272.741	222.503	212.188	250.974	238.274	245.253	236.759	220.126	255.351	254.19	234.387	231.17	201.171	873.307	914.87	896.926	854.674
sp|Q2M2I8|AAK1_HUMAN	sp	Q2M2I8	HUMAN	AAK1	AP2-associated protein kinase 1	17	24	1	0	30	23	15	31	866.202	1045.65	1002.94	991.039	992.248	940.26	1018.48	957.671	954.282	1004.7	873.284	809.307	853.689	899.029	888.253	838.4	1258.02	1243.94	1272.71	1294.71	1249.79	1284.88	1238.6	1239.88	1261.18	1270.05	1260.06	1256.04	1307.65	1223.03	1298.22	1258.72	3825.3	3886.93	3447.23	3426.72
sp|Q9H7C9|AAMDC_HUMAN	sp	Q9H7C9	HUMAN	AAMDC	Mth938 domain-containing protein	4	4	1	0	6	4	8	9	1243.28	1219.3	1090.32	1029.21	1030.41	991.662	1196.96	1055.16	1134.07	1013.9	1071.89	1184.68	1208.04	1147.46	1078.62	1151.29	752.849	839.967	751.436	708.308	734.78	631.867	767.268	729.334	729.226	672.222	615.411	775.285	800.568	744.012	752.298	711.279	815.567	889.768	848.875	828.484
sp|Q13685|AAMP_HUMAN	sp	Q13685	HUMAN	AAMP	Angio-associated migratory cell protein	11	5	1	0	5	7	5	5	1108.13	1251.1	1152.33	1083.54	1063.36	838.466	1232.22	1145.28	1113.89	1150.55	1155.69	1297.66	1133.1	919.468	857.884	858.77	364.418	359.681	341.514	368.86	318.923	291.756	370.558	368.6	351.36	341.259	336.253	360.827	375.09	354.331	312.055	367.6	875.309	847.884	882.773	787.566
sp|Q9Y312|AAR2_HUMAN	sp	Q9Y312	HUMAN	AAR2	Protein AAR2 homolog	8	4	1	0	7	11	7	4	547.484	530.638	525.825	508.514	500.316	493.011	530.993	548.87	529.896	522.328	511.204	530.07	504.365	457.072	394.994	450.978	254.17	195.259	233.69	232.746	258.486	232.17	260.404	255.168	238.608	250.212	216.397	250.169	268.591	252.27	259.442	207.952	974.808	1068.68	1067.9	1069.21
sp|P49588|SYAC_HUMAN	sp	P49588	HUMAN	AARS	Alanine--tRNA ligase, cytoplasmic	116	109	1	0	89	119	99	90	17722.1	15272.9	15067.1	14667.1	14220	14184.5	15252.7	14519.6	14660.1	13953	14330.5	15839.6	15770.6	15664.3	15307.2	16263.4	12097.9	11830	11407.6	10917.9	10521.1	10693.4	11588.1	11156.3	10991.5	10506.8	9968.52	11731.9	11726.2	11864	11811.2	10604.3	15128.1	15658.4	15101.1	15672.3
sp|Q5JTZ9|SYAM_HUMAN	sp	Q5JTZ9	HUMAN	AARS2	Alanine--tRNA ligase, mitochondrial	4	4	1	0	4	17	9	9	478.32	469.274	468.965	440.781	416.431	429.322	462.209	506.921	460.16	409.199	427.026	461.505	494.881	514.492	480.878	469.528	427.168	479.44	389.49	379.402	337.272	388.546	398.497	386.194	350.664	379.862	373.233	437.562	394.699	406.003	400.089	432.242	610.759	617.745	700.397	591.297
sp|Q9BTE6-3|AASD1_HUMAN	sp	Q9BTE6-3	HUMAN	AARSD1	Isoform 3 of Alanyl-tRNA editing protein Aarsd1	15	8	1	0	11	11	3	13	1145.39	1148.92	1107.86	1107.68	1066.84	1112.8	1103.27	1099.65	1083.25	1053.69	1076.46	1139.85	1149.78	1157.89	1145.61	1090.02	569.777	580.277	564.967	578.234	585.225	582.427	611.98	622.749	586.49	565.373	563.703	600.491	617.474	590.447	559.533	532.887	1718.71	1518.51	1523.8	1541.02
sp|Q9BTE6|AASD1_HUMAN	sp	Q9BTE6	HUMAN	AARSD1	Alanyl-tRNA editing protein Aarsd1	0	1	0	1	0	0	0	1	0	0	0	0	0	0	0	0	0	0	0	0	0	0	0	0	20.643	14.7489	14.0501	14.857	14.1443	17.5369	19.7265	16.8776	15.0841	16.4644	17.8067	16.4748	17.3633	20.7425	21.0983	14.3433	0	0	0	0
sp|Q9NRN7|ADPPT_HUMAN	sp	Q9NRN7	HUMAN	AASDHPPT	L-aminoadipate-semialdehyde dehydrogenase-phosphopantetheinyl transferase	12	10	1	0	8	10	14	12	1204.53	1242.54	1204.65	1179.96	1301.92	1200.88	1182.13	1162.89	1206.1	1279.71	1274.07	1209.97	1230.25	1191.5	1163.04	1068.19	853.426	862.214	844.38	801.152	866.698	916.711	802.981	825.571	839.345	813.692	820.962	844.508	793.423	885.67	829.359	779.626	1397.16	1304.22	1321.23	1281.22
sp|Q9UDR5|AASS_HUMAN	sp	Q9UDR5	HUMAN	AASS	Alpha-aminoadipic semialdehyde synthase, mitochondrial	4	4	1	0	5	7	6	4	414.952	388.117	420.995	367.343	374.536	393.263	400.844	412.506	398.866	395.733	410.152	380.139	415.973	417.812	447.231	458.826	204.39	205.567	195.935	198.48	169.233	186.435	183.563	178.998	173.004	183.186	207.857	182.053	203.556	177.705	193.558	226.931	1006.35	1157.32	1222.31	1224.12
sp|Q9NY61|AATF_HUMAN	sp	Q9NY61	HUMAN	AATF	Protein AATF	7	10	1	0	6	12	8	12	627.756	658.037	638.871	611.282	603.191	590.716	672.1	602.359	581.046	612.868	577.285	665.642	665.886	650.86	665.57	655.935	908.717	929.741	850.748	858.339	874.836	849.159	888.877	898.2	796.745	828.447	861.386	920.555	855.968	889.893	907.342	846.836	1137.73	1172.92	1131.42	1073.9
sp|Q9NRK6|ABCBA_HUMAN	sp	Q9NRK6	HUMAN	ABCB10	ATP-binding cassette sub-family B member 10, mitochondrial	2	2	1	0	4	6	5	7	545.569	493.749	493.774	472.522	395.643	513.631	443.469	514.771	454.123	479.558	502.717	411.115	459.082	513.645	473.923	503.306	102.748	141.925	130.382	119.156	110.312	86.7837	123.699	121.552	109.588	108.414	106.425	114.74	121.077	116.346	99.3606	104.21	707.923	527.3	567.303	548.715
sp|Q9NP58|ABCB6_HUMAN	sp	Q9NP58	HUMAN	ABCB6	ATP-binding cassette sub-family B member 6, mitochondrial	1	1	1	0	6	2	4	11	28.7719	27.1226	29.8905	23.0119	30.2481	33.3464	23.1582	30.524	27.1972	29.0298	33.2691	15.8161	25.4989	21.4301	22.1589	23.382	107.204	125.363	102.549	105.402	95.8731	88.2693	105.755	109.856	90.8142	108.884	107.91	90.6073	106.976	99.3924	99.0457	107.196	450.046	400.123	464.655	408.878
sp|O75027-2|ABCB7_HUMAN	sp	O75027-2	HUMAN	ABCB7	Isoform 2 of ATP-binding cassette sub-family B member 7, mitochondrial	5	5	1	0	7	5	3	10	332.975	275.902	276.423	253.733	235.042	274.073	271.045	265.888	272.275	251.85	273.471	217.337	273.044	284.302	251.209	264.44	239.073	288.561	279.928	269.596	222.478	194.951	247.444	225.876	244.409	245.065	241.595	253.947	275.354	272.528	239.35	260.564	1292.25	951.373	1074.54	1158.34
sp|P33527|MRP1_HUMAN	sp	P33527	HUMAN	ABCC1	Multidrug resistance-associated protein 1	10	9	1	0	24	26	18	26	745.934	724.032	826.172	810.852	710.77	923.295	694.36	895.969	782.923	768.089	852.9	596.637	705.833	864.268	756.164	829.362	595.23	948.933	854.969	762.185	671.402	580.771	689.241	725.22	730.656	742.813	767.885	698.111	700.467	709.609	599.813	821.82	3670.5	3266.19	3708.84	3633.02
sp|O15438-4|MRP3_HUMAN	sp	O15438-4	HUMAN	ABCC3	Isoform 4 of Canalicular multispecific organic anion transporter 2	1	3	1	0	4	6	3	14	58.5295	48.5021	52.3612	65.5003	55.58	60.91	48.4801	47.8056	61.8115	60.7963	57.4711	45.6962	56.9418	55.5884	59.0422	65.3084	112.657	180.947	142.455	127.73	102.71	97.5977	136.086	117.321	123.303	116.123	119.124	140.341	134.241	137.555	116.24	139.532	579.902	517.407	554.022	564.918
sp|O15439|MRP4_HUMAN	sp	O15439	HUMAN	ABCC4	Multidrug resistance-associated protein 4	5	4	1	0	21	8	9	12	246.758	227.613	285.984	287.517	221.556	292.016	234.787	286.894	268.69	253.642	278.03	180.206	224.725	275.989	256.101	255.016	223.206	349.286	310.389	290.804	225.12	210.187	273.897	272.922	261.286	312.643	273.819	263.195	257.893	258.147	238.978	269.713	2527.4	2247.97	2534.34	2422
sp|P33897|ABCD1_HUMAN	sp	P33897	HUMAN	ABCD1	ATP-binding cassette sub-family D member 1	1	3	1	0	7	3	2	6	43.7831	42.1796	45.5114	43.7984	45.7025	43.8328	49.4889	45.7189	43.5288	43.7538	39.302	40.4364	48.237	49.5982	43.3472	52.9628	54.8094	54.8646	49.5453	53.3345	54.3208	51.2179	59.3806	51.9766	51.5378	58.2737	45.7977	61.4929	61.4988	53.3767	58.6231	65.3481	810.441	881.912	861.459	777.353
sp|P28288|ABCD3_HUMAN	sp	P28288	HUMAN	ABCD3	ATP-binding cassette sub-family D member 3	19	12	1	0	20	18	17	13	1807.4	1714.6	1801.61	1805.74	1632.27	1842.08	1786.2	1853.09	1831.54	1710.35	1723.63	1600	1740.04	1906.55	1847.94	1788.61	436.034	395.773	486.354	462.494	465.183	394.735	455.091	464.107	456.38	481.686	443.199	440.912	457.502	435.826	446.569	439.686	4088.44	3812.53	3909.2	3976.06
sp|P61221|ABCE1_HUMAN	sp	P61221	HUMAN	ABCE1	ATP-binding cassette sub-family E member 1	66	51	1	0	40	39	34	35	6978.79	7310.23	7269.95	7326.23	7177.84	6834.76	7318.56	7232.81	7321.57	7478.49	7404.64	7492.07	7387.27	7409.58	7460.05	7139.42	4945.22	5023.78	5224.68	5145.63	5215.64	4957.01	4901.98	5139.71	5250.84	5242.51	5158.99	5038.85	5033.56	5031.71	4930.35	4434.18	7882.93	7883.67	7789.47	7893.67
sp|Q8NE71|ABCF1_HUMAN	sp	Q8NE71	HUMAN	ABCF1	ATP-binding cassette sub-family F member 1	33	35	1	0	38	35	30	32	3307.65	3379.16	3352.87	3081.33	3220.64	3318.28	3285.09	3236.22	2951.79	3422.16	3296.35	3601.4	3437.81	3718.29	3554.02	3605.89	2701.03	2492.62	2761.28	2670.15	2638.69	2884.15	2711.93	2689.65	2682.86	2733.31	2960.87	2849.62	2713.48	2653.05	2757.48	2654.23	6634.84	7073.33	7193.36	7043.51
sp|Q9UG63-2|ABCF2_HUMAN	sp	Q9UG63-2	HUMAN	ABCF2	Isoform 2 of ATP-binding cassette sub-family F member 2	41	36	1	0	38	36	35	26	5089.95	5376.9	5227.63	5048.36	4936.4	4759.54	5427.29	5275.61	5066.46	4892.51	4618.73	5436.16	5380.6	5076.02	4928.26	4634.23	3455.08	3528.96	3296.73	3459.56	3485.09	3542.22	3765.57	3483.65	3490.18	3532.27	3410.04	3349.47	3468.17	3379.13	3325.12	2944.12	8599.64	8351.26	7824.87	8082.9
sp|Q9NUQ8|ABCF3_HUMAN	sp	Q9NUQ8	HUMAN	ABCF3	ATP-binding cassette sub-family F member 3	20	16	1	0	9	16	16	13	2482.41	2541.13	2412.72	2277.76	2126.49	2066.06	2536.47	2476.19	2242.44	2355.78	2166.2	2635.05	2483.02	2608.52	2328.74	2515.72	1240.46	1113.18	1064.47	1046.64	1021.01	1121.75	1137.39	1104.61	1108.11	1079.78	1120.32	1190.9	1223.89	1212.5	1195.98	1102.28	2268.9	2270.35	2118.55	2160.51
sp|Q9UNQ0|ABCG2_HUMAN	sp	Q9UNQ0	HUMAN	ABCG2	ATP-binding cassette sub-family G member 2	1	0	0	1	0	0	0	0	11.7487	15.8966	18.5917	13.3447	11.2575	17.2907	15.0614	19.5614	14.197	15.1618	17.7036	13.4898	15.0837	16.3659	13.5351	15.702	0	0	0	0	0	0	0	0	0	0	0	0	0	0	0	0	0	0	0	0
sp|Q9NUJ1|ABHDA_HUMAN	sp	Q9NUJ1	HUMAN	ABHD10	Mycophenolic acid acyl-glucuronide esterase, mitochondrial	14	9	1	0	6	6	7	7	1601.92	1528.25	1568.66	1516.53	1493.41	1633.37	1515.82	1499.6	1542.67	1535.45	1583.48	1587.95	1593.04	1588.6	1666.64	1668.16	705.305	723.085	724.661	710.825	721.826	841.878	743.339	704.073	693.917	762.132	872.345	724.042	727.681	695.965	724.663	678.452	757.837	756.324	729.441	718.073
sp|Q8NFV4|ABHDB_HUMAN	sp	Q8NFV4	HUMAN	ABHD11	Protein ABHD11	6	7	1	0	5	4	3	3	346.692	346.533	359.318	344.622	371.3	395.071	358.085	332.574	348.202	370.648	361.918	360.445	351.72	376.536	386.402	363.665	478.102	486.841	481.17	478.254	481.696	509.666	479.739	458.177	450.449	529.459	570.944	465.298	476.613	469.454	483.082	475.918	817.756	752.619	679.379	781.079
sp|Q8N2K0-2|ABD12_HUMAN	sp	Q8N2K0-2	HUMAN	ABHD12	Isoform 2 of Monoacylglycerol lipase ABHD12	6	8	1	0	9	12	11	12	656.64	653.648	656.912	618.577	633.209	621.121	681.02	604.384	600.044	601.643	556.566	683.844	661.125	656.511	633.743	661.876	406.634	397.736	410.492	353.679	356.231	321.52	416.229	387.215	345.409	391.056	325.498	423.183	394.144	400.945	377.043	395.115	1357.8	1229.61	1350.46	1291.55
sp|Q96IU4|ABHEB_HUMAN	sp	Q96IU4	HUMAN	ABHD14B	Protein ABHD14B	6	7	1	0	10	4	4	7	866.245	835.616	806.325	851.842	810.393	784.444	837.422	777.746	803.717	770.311	752.65	864.715	837.809	898.869	886.739	930.633	351.827	344.059	351.363	306.957	310.703	297.7	324.274	334.303	326.557	331.406	291.653	322.26	314.548	320.026	353.946	344.25	1572.48	1749.31	1785.48	1626.24
sp|O95870|ABHGA_HUMAN	sp	O95870	HUMAN	ABHD16A	Protein ABHD16A	1	2	1	0	5	12	7	7	22.3013	24.8895	23.5872	22.9298	19.8914	26.4015	37.7908	28.1943	27.4577	32.8832	31.4902	27.559	25.1697	31.3758	31.4752	27.2355	140.574	119.573	137.202	119.717	109.555	95.3304	122.362	123.255	134.708	130.287	139.551	155.78	136.501	134.694	147.635	236.479	513.529	424.171	533.644	518.334
sp|Q96GS6-2|AB17A_HUMAN	sp	Q96GS6-2	HUMAN	ABHD17A	Isoform 2 of Protein ABHD17A	0	1	0	1	0	1	0	0	0	0	0	0	0	0	0	0	0	0	0	0	0	0	0	0	33.9322	51.9215	37.314	33.6381	35.0473	20.1425	44.6156	41.0916	36.703	33.904	22.9624	49.3519	47.0532	37.6518	30.8834	32.1962	0	0	0	0
sp|P08910|ABHD2_HUMAN	sp	P08910	HUMAN	ABHD2	Monoacylglycerol lipase ABHD2	0	1	0	1	1	1	3	4	0	0	0	0	0	0	0	0	0	0	0	0	0	0	0	0	136.141	56.9115	48.4733	31.7508	28.4899	34.3699	65.5748	45.5709	32.2297	39.7939	40.8172	100.375	113.652	128.319	113.203	88.8305	135.138	140.436	123.56	120.978
sp|Q8WTS1|ABHD5_HUMAN	sp	Q8WTS1	HUMAN	ABHD5	1-acylglycerol-3-phosphate O-acyltransferase ABHD5	1	0	0	1	0	0	1	1	24.3186	19.0058	20.934	19.7035	13.4941	24.4808	29.1843	23.1602	24.0516	27.6845	26.1631	21.4033	20.7327	22.7249	16.433	32.0274	0	0	0	0	0	0	0	0	0	0	0	0	0	0	0	0	0	0	0	0
sp|Q9BV23|ABHD6_HUMAN	sp	Q9BV23	HUMAN	ABHD6	Monoacylglycerol lipase ABHD6	3	3	1	0	1	4	4	3	139.252	127.298	135.174	132.926	156.186	138.17	138.25	118.274	139.373	157.384	151.243	133.764	131.437	130.326	132.017	145.697	61.8002	50.2206	64.6256	50.6046	54.3906	60.7881	61.205	56.3218	48.8338	57.1894	61.6613	60.6564	55.8681	58.9154	55.9259	57.9733	54.239	62.4155	59.3249	62.3414
sp|Q8IZP0|ABI1_HUMAN	sp	Q8IZP0	HUMAN	ABI1	Abl interactor 1	2	4	1	0	10	10	9	7	165.862	155.893	167.184	138.881	172.247	145.058	162.015	180.369	155.774	143.127	174.119	205.645	181.928	187.384	188.849	180.943	386.157	393.164	379.107	378.632	363.575	357.202	358.965	382.803	351.217	388.412	380.072	397.462	367.916	376.902	352.261	377.944	1283.72	1514.05	1290.2	1249.77
sp|Q9NYB9|ABI2_HUMAN	sp	Q9NYB9	HUMAN	ABI2	Abl interactor 2	5	4	1	0	4	11	7	4	656.094	635.228	629.009	639.726	593.222	597.158	635.093	618.194	618.672	605.696	615.65	703.317	640.968	667.614	612.223	671.555	352.764	381.483	329.189	345.53	319.217	353.932	353.761	331.287	347.734	349.25	324.608	355.248	338.948	336.647	315.176	329.131	913.624	815.369	769.741	749.924
sp|Q7Z7G0|TARSH_HUMAN	sp	Q7Z7G0	HUMAN	ABI3BP	Target of Nesh-SH3	1	1	1	0	0	0	1	0	38.0175	29.1449	24.2792	25.4346	23.4845	32.511	31.9359	25.7284	24.6693	25.9322	24.9369	33.579	35.7322	31.3941	25.9828	55.2087	76.4321	66.503	44.0627	39.4829	40.3296	48.2447	56.0914	45.2242	45.3382	37.9749	51.8586	91.5413	73.921	75.6194	70.7484	98.5192	0	0	0	0
sp|P00519-2|ABL1_HUMAN	sp	P00519-2	HUMAN	ABL1	Isoform IB of Tyrosine-protein kinase ABL1	1	2	1	0	9	8	7	7	28.7327	27.8152	25.6363	30.5173	19.4722	24.1901	28.2267	24.0286	23.3185	27.9741	25.7995	31.0511	32.5493	26.6173	25.8293	33.3844	836.413	715.083	719.924	670.937	682.666	647.872	688.999	679.483	672.351	661.261	688.191	738.063	807.744	747.865	812.624	719.62	1853.65	1717.29	1929.75	1854.02
sp|O94929|ABLM3_HUMAN	sp	O94929	HUMAN	ABLIM3	Actin-binding LIM protein 3	3	4	1	0	10	13	11	10	347.849	359.264	333.689	292.291	273.506	251.763	361.071	318.503	331.993	276.936	281.071	374.149	339.048	351.175	328.431	340.8	130.478	103.054	143.144	118.884	113.001	96.2625	133.769	145.979	127.287	119.892	126.855	125.735	133.685	115.194	143.677	113.075	1613.88	1584.07	1473.74	1422.56
sp|Q12979|ABR_HUMAN	sp	Q12979	HUMAN	ABR	Active breakpoint cluster region-related protein	10	10	1	0	18	17	16	21	557.211	565.534	534.674	533.524	544.632	518.537	562.041	522.013	534.977	540.298	502.886	547.477	566.583	567.082	541.468	562.263	666.54	614.793	641.197	608.765	605.212	626.061	624.499	598.451	604.488	607.349	588.073	624.793	651.041	634.374	641.785	616.23	2815.89	2952.01	2826.31	2724.65
sp|Q9P1F3|ABRAL_HUMAN	sp	Q9P1F3	HUMAN	ABRACL	Costars family protein ABRACL	5	4	1	0	1	1	2	0	914.211	692.131	691.037	715.148	788.765	800.405	722.574	718.953	808.642	881.923	836.437	723.769	759.4	805.542	1021.9	986.744	520.525	448.791	476.592	477.989	510.71	492.775	466.542	521.846	489.91	458.531	463.027	525.736	503.169	515.831	552.248	547.568	270.156	275.477	238.117	269.167
sp|Q9ULW3|ABT1_HUMAN	sp	Q9ULW3	HUMAN	ABT1	Activator of basal transcription 1	1	3	1	0	1	5	2	4	20.3078	16.5868	12.7234	13.8768	12.4245	12.6986	19.8898	17.3828	13.8398	13.7597	13.0243	18.2276	25.6072	21.3777	18.2816	15.8255	148.085	144.417	157.586	141.842	122.619	125.476	162.068	155.397	158.229	147.245	140.204	143.372	147.526	134.414	137.023	126.529	85.3805	80.2484	82.2528	66.1406
sp|Q969K4|ABTB1_HUMAN	sp	Q969K4	HUMAN	ABTB1	Ankyrin repeat and BTB/POZ domain-containing protein 1	1	1	1	0	1	1	2	1	36.3554	36.6174	27.3456	28.1788	19.6056	24.8141	30.7136	28.6957	30.8692	27.7632	29.7796	32.5673	32.3037	29.3298	30.0359	32.0048	37.4218	26.9004	28.9655	23.223	24.3018	23.1033	26.544	24.1897	26.0183	26.01	19.5036	30.1048	29.5627	27.5349	28.1044	31.5893	76.3928	84.2023	88.3442	75.511
sp|P09110|THIK_HUMAN	sp	P09110	HUMAN	ACAA1	3-ketoacyl-CoA thiolase, peroxisomal	13	21	1	0	30	8	10	21	1262.58	1183.83	1197.86	1252.09	1168.36	1328.97	1229.59	1202.02	1254.12	1257.17	1318.04	1228.5	1217.47	1249.49	1254.99	1327.22	1963.78	1742.88	1901.66	1878.24	1996.98	2105.6	1857.5	1897.26	1912.7	2037.6	2143.32	1950.45	1863.59	1919.77	2005.49	1994.45	5119.21	5184.18	5061.33	5016.26
sp|P42765|THIM_HUMAN	sp	P42765	HUMAN	ACAA2	3-ketoacyl-CoA thiolase, mitochondrial	34	27	1	0	45	40	36	35	2493.35	2354.44	2411.81	2360.14	2435.32	2779.1	2409.15	2493.55	2445.86	2548.62	2795.75	2424.12	2527.4	2626.8	2622.4	2825.8	1626.01	1290.94	1460.86	1463.13	1606.52	1942.37	1390.78	1328.1	1506.43	1603.07	1884.47	1532.53	1452.74	1534.76	1640.27	1673.81	5920.18	5920.4	5958.91	5857.46
sp|Q13085-4|ACACA_HUMAN	sp	Q13085-4	HUMAN	ACACA	Isoform 4 of Acetyl-CoA carboxylase 1	37	50	1	0	21	42	35	32	2855.16	2611.77	2563.35	2469.72	2472.01	2818.2	2476.14	2626.19	2512	2427.1	2667.54	2788.44	2842.38	2683.42	2674.58	2692.8	3181.57	2935.14	3224.53	3054.35	2852.51	2552.53	3066.19	3060.72	2965.52	2998.12	2986.9	3238.48	3177.37	3293.19	3053.31	2791.47	3174.7	3161.1	3174.45	3184.51
sp|O00763|ACACB_HUMAN	sp	O00763	HUMAN	ACACB	Acetyl-CoA carboxylase 2	2	2	1	0	5	5	3	3	278.88	262.545	235.057	234.021	209.734	275.543	246.971	267.247	230.701	202.763	254.749	268.562	246.805	292.918	182.89	291.657	32.7564	32.8542	36.0573	42.8623	27.041	23.5475	32.8169	35.9511	40.8326	28.1338	36.9699	42.7066	33.8425	38.18	33.8945	34.1469	787.144	659.544	810.786	769.704
sp|Q709F0|ACD11_HUMAN	sp	Q709F0	HUMAN	ACAD11	Acyl-CoA dehydrogenase family member 11	1	5	1	0	7	5	6	6	27.7024	30.6628	25.5556	29.3172	34.1491	27.8123	33.0328	29.3382	27.2498	21.7018	26.6717	30.3062	31.0037	25.6075	31.3921	30.2527	304.101	241.68	283.343	280.629	278.113	263.754	268.104	274.252	295.99	295.011	325.813	293.725	281.544	293.716	321.589	318.711	696.403	781.293	720.709	747.422
sp|Q9UKU7|ACAD8_HUMAN	sp	Q9UKU7	HUMAN	ACAD8	Isobutyryl-CoA dehydrogenase, mitochondrial	0	5	0	1	5	1	2	3	0	0	0	0	0	0	0	0	0	0	0	0	0	0	0	0	199.533	199.295	219.767	223.241	234.79	236.713	235.376	221.246	243.677	258.656	236.015	219.856	245.116	215.903	205.855	267.009	646.073	592.672	518.973	616.967
sp|Q9H845|ACAD9_HUMAN	sp	Q9H845	HUMAN	ACAD9	Acyl-CoA dehydrogenase family member 9, mitochondrial	9	21	1	0	20	13	17	17	910.11	878.218	921.504	849.298	828.761	935.131	867.893	972.082	872.298	823.144	869.158	885.881	958.286	953.366	954.473	967.036	2172.63	2223.48	2112.82	2050.09	2011.05	2055.79	2112.26	2083.04	1951.71	2066.1	2210.46	2189.75	2145.02	2271.29	2164.8	2150.13	2834.9	2521.1	2637.27	2529.68
sp|P11310-2|ACADM_HUMAN	sp	P11310-2	HUMAN	ACADM	Isoform 2 of Medium-chain specific acyl-CoA dehydrogenase, mitochondrial	24	28	1	0	20	18	14	21	1532.27	1533.06	1511.22	1494.34	1544.19	1606.34	1509.55	1499.65	1485.19	1512.2	1568.97	1587.07	1577.09	1635.47	1659.51	1641.06	2380.04	2083.7	2236.7	2251.99	2223.39	2580.43	2266.74	2209.14	2219.06	2389.04	2520.11	2242.02	2284.9	2259.82	2302.1	2373.79	4538.33	4568.86	4458.93	4711.01
sp|P16219|ACADS_HUMAN	sp	P16219	HUMAN	ACADS	Short-chain specific acyl-CoA dehydrogenase, mitochondrial	6	8	1	0	6	4	9	7	501.811	492.544	487.476	517.086	484.576	543.32	517.776	475.252	483.502	491.149	486.727	553.22	537.139	545.372	538.322	536.196	709.96	695.526	739.673	689.816	690.819	783.011	687.72	703.161	717.796	734.397	748.302	723.504	753.124	720.556	716.644	721.158	1170.06	1054.21	1041.34	1082.69
sp|P45954|ACDSB_HUMAN	sp	P45954	HUMAN	ACADSB	Short/branched chain specific acyl-CoA dehydrogenase, mitochondrial	15	18	1	0	8	7	6	7	954.156	924.037	943.105	918.432	859.516	917.319	971.265	956.91	914.694	911.953	950.423	993.573	985.906	1049.66	1007.85	966.431	1089.18	1020.82	1077.53	1062.72	1010.34	1111.23	1073.21	1056.6	1060.61	1066.52	1096.24	1054.9	1045.89	1063.82	1125.67	1019.13	1261.52	1131.51	1046.87	1073.96
sp|P49748-3|ACADV_HUMAN	sp	P49748-3	HUMAN	ACADVL	Isoform 3 of Very long-chain specific acyl-CoA dehydrogenase, mitochondrial	74	64	1	0	63	63	48	49	6491.64	6281.65	6453.85	6187.07	6004.22	5860.3	6240.18	6478.55	6081.5	6067.43	5788.66	6422.69	6544.03	6734.89	6852.1	6337.15	6002.05	6330.51	5968.13	5875.93	5877.59	5885.01	6039.15	5956.92	5702.36	5858.75	5814.9	6300.41	6150.32	6097.4	5978.75	5782.99	8515.43	8784.41	8570.41	8519.56
tr|Q6J3J6|Q6J3J6_VACCA	tr	Q6J3J6	VACCA	ACAM3000_MVA_033	Pox_I6 domain-containing protein	29	23	1	0	5	8	6	7	654.357	1910.41	2727.71	3528.98	4499.37	4566.29	1998.55	3226.84	4333.56	4521.86	3698.57	620.865	585.078	633.036	602.067	644.99	377.601	2377.98	2840.81	3345.04	4029.1	4560.84	2020.84	3161.43	4031.63	4255.73	3799.51	332.02	304.678	399.794	311.63	439.621	238.631	252.697	252.953	281.91
tr|Q6J3I9|Q6J3I9_VACCA	tr	Q6J3I9	VACCA	ACAM3000_MVA_040	Uncharacterized protein	1	2	1	0	3	1	1	2	8.99099	45.2495	40.1493	29.4247	16.4024	16.6718	48.414	51.8702	30.7609	23.761	27.1125	11.4825	7.64242	7.86141	7.34748	5.47831	14.3301	157.655	93.2852	33.3953	31.8345	30.9612	172.38	163.107	83.0321	67.2068	57.6969	10.7469	9.8141	11.4018	14.4387	16.7408	172.215	133.96	167.112	224.142
tr|Q6J3H8|Q6J3H8_VACCA	tr	Q6J3H8	VACCA	ACAM3000_MVA_052	Protein E5	16	11	1	0	10	8	10	12	92.8773	3711.85	1767.86	503.018	393.343	504.193	3864.84	5454.98	2461.7	1542.07	1415.38	61.2213	85.3316	200.269	152.351	153.348	59.8854	2483.65	864.277	258.475	197.357	222.372	2502.92	2926.42	1305.22	884.422	677.478	10.9332	50.6728	90.0103	72.5794	69.0249	824.486	864.1	892.711	2189.5
tr|Q6J3H0|Q6J3H0_VACCA	tr	Q6J3H0	VACCA	ACAM3000_MVA_059	Uncharacterized protein	5	9	1	0	25	19	16	29	102.398	988.099	583.101	476.284	526.088	426.541	996.427	1110	539.089	432.553	356.117	83.2955	90.0959	116.357	102.435	136.191	135.861	1429.68	1135.63	633.057	485.037	318.237	1547.63	1947.32	927.981	663.013	473.592	111.331	130.203	124.696	129.767	118.984	1292.63	1237.9	1469.42	1724.88
tr|Q6J3F9|Q6J3F9_VACCA	tr	Q6J3F9	VACCA	ACAM3000_MVA_071	Protein G3	2	2	1	0	0	1	2	4	11.4905	148.202	196.407	239.597	286.026	306.239	148.689	156.203	161.769	172.342	157.353	26.1178	34.1494	48.9892	60.337	106.302	1.14275	903.814	724.259	740.058	695.904	750.275	515.395	592.849	555.492	481.039	498.968	68.6821	131.813	118.866	112.549	111.488	0	0	0	0
tr|Q6J3E8|Q6J3E8_VACCA	tr	Q6J3E8	VACCA	ACAM3000_MVA_082	Uncharacterized protein	17	14	1	0	5	5	4	15	251.298	1738.09	2085.87	3351.53	4759.45	5146.87	1685.5	1629.29	1580.73	1857.06	1691.01	619.643	591.828	546.476	577.004	508.875	467.021	1447.84	1609.21	1754.96	2192.55	2181.15	1278.46	1406.61	1172.83	1331.05	1163.12	810.979	903.472	763.575	674.451	652.239	168.354	149.237	177.745	303.588
tr|Q6J3E5|Q6J3E5_VACCA	tr	Q6J3E5	VACCA	ACAM3000_MVA_085	Virion protein	22	26	1	0	1	3	2	7	146.124	2200.39	3002.88	5404.77	7026.51	5982.46	2246.54	2105.24	2356.07	2544.42	2110.38	909.801	782.85	636.184	733.866	738.009	185.374	1457.61	1984.64	3206.19	3909.92	4259.06	1436.56	1577.52	1659.04	1647.38	1478.13	831.012	1018.32	721.358	571.204	519.679	19.6371	15.728	20.5995	47.9083
tr|Q6J3A9|Q6J3A9_VACCA	tr	Q6J3A9	VACCA	ACAM3000_MVA_121	Major core protein 4a precursor	244	225	1	0	109	103	81	250	3965.2	32452.9	33437.7	47538.9	68454.9	68923.1	32109.6	31738.8	29685.6	33093	30283.6	13163.2	12408.7	11942.5	12060	10958.4	3053.34	25699.3	27994.6	32985.3	43075.4	40024.6	24908.5	27798.3	23856.7	24577.9	26310.6	11805.8	14835.1	12678	10117.1	8400.47	2697.98	2607.82	3391.96	5749.52
sp|Q6J362|POXIN_VACCA	sp	Q6J362	VACCA	ACAM3000_MVA_168	Poxin	0	2	0	1	12	11	9	14	0	0	0	0	0	0	0	0	0	0	0	0	0	0	0	0	28.6621	281.568	218.883	168.515	159.407	152.222	277.979	187.506	192.964	123.538	109.933	15.4989	41.175	27.2808	32.5481	26.8722	494.133	508.368	595.286	811.125
tr|Q6J356|Q6J356_VACCA	tr	Q6J356	VACCA	ACAM3000_MVA_176	Soluble interferon-gamma receptor-like	82	70	1	0	7	14	12	12	806.168	9738.19	13953.1	13639.6	13769.9	13802.1	10322.6	20381.1	26370.9	27407.2	25981.1	761.791	633.07	844.275	746.447	1100.85	407.541	6829.82	8230.41	8394.53	8074.33	9709.39	6569.49	11474.8	13753.4	13951.1	14859.9	290.865	286.028	401.99	348.534	526.344	419.836	319.073	462.996	478.704
tr|Q6J345|Q6J345_VACCA	tr	Q6J345	VACCA	ACAM3000_MVA_187	IFN-alpha/beta-receptor-like secreted glycoprotein	48	45	1	0	11	20	18	30	750.795	4840.65	7008.77	6303.13	6352.38	6024.49	4902.72	8945.03	10660.5	10107.9	10155.6	602.785	570.842	706.345	768.157	859.897	401.277	4132.81	5868.27	5054.14	4541.1	5254.74	3998.23	7324.08	8721.19	7775.07	7122.93	306.656	284.239	414.413	396.998	434.956	378.031	431.155	467.306	487.105
sp|Q15057|ACAP2_HUMAN	sp	Q15057	HUMAN	ACAP2	Arf-GAP with coiled-coil, ANK repeat and PH domain-containing protein 2	20	18	1	0	26	25	25	25	2055.41	1969.7	1934.08	1980.34	1969.15	1928.9	1998.39	1910.09	1874.37	1902.57	1850.77	1962.76	1902.65	2005.47	1953.05	1986.81	1551.04	1441.03	1433.59	1424.79	1395.06	1543.56	1420.3	1404.52	1419.39	1475.67	1453.11	1425.37	1479.68	1448.73	1545.32	1536.34	3804.05	4171.89	4254.59	4095.76
sp|Q96P50|ACAP3_HUMAN	sp	Q96P50	HUMAN	ACAP3	Arf-GAP with coiled-coil, ANK repeat and PH domain-containing protein 3	2	2	1	0	6	3	1	4	121.238	121.09	105.338	97.117	91.3503	101.941	125.344	113.742	98.0045	96.3045	76.3695	126.813	129.201	119.784	107.737	102.973	100.452	90.3939	87.5396	86.602	69.099	81.7275	88.8229	83.9488	89.4037	71.9175	77.8254	93.7449	99.8754	97.495	92.5829	79.0096	1221.4	1275.79	1696.29	1282.29
sp|P24752|THIL_HUMAN	sp	P24752	HUMAN	ACAT1	Acetyl-CoA acetyltransferase, mitochondrial	55	54	1	0	34	23	24	24	5189.76	4804.57	5008.25	5031.67	4952.33	5533.37	4986.54	5094.42	5042.92	5090.96	5475.8	4975.32	5180.43	5254.83	5574.12	5522.02	6082.72	6167.21	5835.76	5769.04	5917.71	6782.97	5840.76	5799.95	5757.98	6002.44	6893.45	5982.44	5926.54	6030.65	6012.56	5762.24	4260.1	4313.26	4198.18	4245.66
sp|Q9BWD1-2|THIC_HUMAN	sp	Q9BWD1-2	HUMAN	ACAT2	Isoform 2 of Acetyl-CoA acetyltransferase, cytosolic	23	28	1	0	28	18	17	16	1528.54	1300.25	1280.11	1288.7	1251.2	1278.5	1249.88	1290.64	1220.06	1249.78	1378.51	1371.48	1376.27	1399.11	1461.61	1551.03	2065.45	1796.05	1894.17	1771.54	1805.47	1786.51	1845.07	1812.65	1746.4	1662.51	1655.94	1998.44	1904.14	1916.8	1924.41	2029.33	3120	3055.14	2874.03	2858.9
sp|Q9H3P7|GCP60_HUMAN	sp	Q9H3P7	HUMAN	ACBD3	Golgi resident protein GCP60	25	24	1	0	20	24	15	28	2795.76	2905.58	2837.71	2818.5	2843.27	2730.22	2978.46	2839.12	2870.81	3002.19	3078.4	2929.24	2912	2969.61	2968.38	2842.68	2078.01	2020.55	1916.74	1919.26	1884.98	2188.61	1988.92	1936.39	1944.34	1964.78	2139.66	1951.39	1983.97	1982.58	2045.41	1999.69	2910.87	2783.16	2715.18	2798.24
sp|Q5T8D3-3|ACBD5_HUMAN	sp	Q5T8D3-3	HUMAN	ACBD5	Isoform 3 of Acyl-CoA-binding domain-containing protein 5	10	10	1	0	8	14	11	12	825.466	809.583	757.238	787.261	746.636	748.564	798.122	790.797	774.833	724.525	771.818	659.644	796.33	829.409	810.131	856.897	820.681	800.616	738.496	768.493	792.194	788.739	804.549	800.857	777.979	757.041	769.227	797.737	836.648	830.658	812.275	945.938	1192.32	1201.65	1170.47	1140.9
sp|Q9BR61|ACBD6_HUMAN	sp	Q9BR61	HUMAN	ACBD6	Acyl-CoA-binding domain-containing protein 6	1	3	1	0	4	3	1	2	90.1571	89.8684	87.6683	77.5502	85.0321	74.9984	90.774	83.4321	81.8963	83.6166	84.5243	90.7882	88.3509	72.8681	68.1741	60.7772	140.021	125.3	131.69	133.792	146.962	140.803	120.994	134.55	122.161	133.185	129.399	141.418	153.199	135.203	123.52	78.8773	543.459	472.164	367.707	445.645
sp|Q8N6N7|ACBD7_HUMAN	sp	Q8N6N7	HUMAN	ACBD7	Acyl-CoA-binding domain-containing protein 7	2	2	1	0	1	1	1	2	77.5007	91.8916	68.3084	67.2585	63.8293	53.1992	103.975	78.2406	69.1766	65.5458	58.9143	108.999	88.9938	72.9536	75.333	70.4531	147.063	131.507	142.885	153.317	149.822	128.086	135.085	164.194	148.394	129.587	106.533	147.166	153.327	151.144	144.366	127.295	60.3088	52.0124	56.3157	51.2917
sp|Q9UKV3|ACINU_HUMAN	sp	Q9UKV3	HUMAN	ACIN1	Apoptotic chromatin condensation inducer in the nucleus	46	34	1	0	56	47	46	54	5102.08	4866.59	4765.12	4667.74	4685.47	4733.75	4958.66	4669.75	4685.81	4721.43	4899.4	4971.56	4855.69	4942.73	5209.88	5420.33	2992.39	2746.9	2728.21	2725.01	2804.55	3108.53	2824.44	2785.23	2772.3	2910.41	3153.28	2936.81	2900.3	3012.46	3063.37	2987.74	9080.59	9235.48	9121.16	8654.49
sp|P53396|ACLY_HUMAN	sp	P53396	HUMAN	ACLY	ATP-citrate synthase	180	165	1	0	121	110	90	118	22171.6	21002	20647.7	20755.9	20885.8	21362.1	20854.1	20932.7	20782.2	20495.1	21336.1	21895.7	21721.7	21994	22594.5	22995.3	18357.2	16337.8	16989.2	16613.9	16865.9	18150.8	16433.7	16557.9	17040.5	16840.6	17915.8	17194.8	17165.4	17707.3	18016.4	19043.6	23941.8	27054.1	24972	25560.3
sp|P53396-2|ACLY_HUMAN	sp	P53396-2	HUMAN	ACLY	Isoform 2 of ATP-citrate synthase	0	2	0	1	2	2	2	2	0	0	0	0	0	0	0	0	0	0	0	0	0	0	0	0	386.927	290.271	302.221	298.671	363.891	348.941	263.15	306.756	321.013	339.658	388.292	287.503	316.718	369.388	362.912	378.582	904.827	1081.98	952.232	1039.93
sp|P21399|ACOC_HUMAN	sp	P21399	HUMAN	ACO1	Cytoplasmic aconitate hydratase	36	33	1	0	25	33	40	26	3094.23	2880.51	2815.74	2782.65	2703.52	2615.55	2794.65	2728.51	2741.26	2700.74	2573.26	2953.18	2919.56	3008.19	2962.91	3002.11	4050.1	3732.86	3736.93	3630.86	3567.28	3840.43	3828.35	3661.81	3583.19	3484	3484.53	4027.13	3912.6	4011.93	3864.06	3629.84	4099.11	4032.67	3696.55	3887.8
sp|Q99798|ACON_HUMAN	sp	Q99798	HUMAN	ACO2	Aconitate hydratase, mitochondrial	61	46	1	0	34	40	30	40	6074.36	5561.01	5823.61	5600.52	5298.31	6094.86	5634.94	6071.57	5720.3	5699.92	6142.03	5771.5	6173.75	6289.2	6342.02	6586.81	4536.48	4683.04	4230.9	4196.75	3935.63	4587.05	4199.7	4093.72	3995.7	4263.33	4763.51	4514.94	4479.54	4502.21	4382.23	4454.52	6037.17	6254.52	5982.45	5907.65
sp|Q9NPJ3|ACO13_HUMAN	sp	Q9NPJ3	HUMAN	ACOT13	Acyl-coenzyme A thioesterase 13	5	7	1	0	2	3	3	3	931.763	911.408	912.568	880.673	883.504	955.806	917.556	891.536	868.794	855.984	930.6	890.315	946.731	958.654	927.297	985.214	766.531	667.504	721.807	739.994	750.085	879.672	725.553	695.908	684.558	749.598	828.175	737.083	772.702	739.049	772.785	772.21	649.828	650.039	592.578	643.287
sp|P49753|ACOT2_HUMAN	sp	P49753	HUMAN	ACOT2	Acyl-coenzyme A thioesterase 2, mitochondrial	16	12	1	0	19	13	12	19	1214.54	1074.54	1136.7	1134.52	1049.01	1259.53	1108.94	1107.53	1115.95	1129.69	1207.44	1133.02	1177.85	1207.59	1264.76	1338.5	803.535	707.393	758.181	755.645	690.205	868.642	729.417	741.041	722.641	762.548	869.745	754.474	797.177	807.858	842.272	978.089	3151.76	3028.77	3126.06	2882.34
sp|O00154|BACH_HUMAN	sp	O00154	HUMAN	ACOT7	Cytosolic acyl coenzyme A thioester hydrolase	24	28	1	0	35	26	30	25	2918.15	2676.09	2803.97	2687.74	2857.35	2642.87	2725.92	2736.29	2690.58	2688.62	2653.9	2741.12	2910.75	3063.19	3146.7	2933.24	2299.62	2207.76	2320.73	2282.03	2410.18	2254.25	2254.94	2422.79	2312.26	2292.52	2189.54	2398	2359.18	2429.46	2356.8	2169.65	6907.1	6702.44	6741.96	6638.68
sp|O14734|ACOT8_HUMAN	sp	O14734	HUMAN	ACOT8	Acyl-coenzyme A thioesterase 8	0	2	0	1	5	2	3	5	0	0	0	0	0	0	0	0	0	0	0	0	0	0	0	0	200.094	191.77	184.361	184.163	196.235	226.986	175.437	175.664	186.039	188.272	230.719	183.252	195.187	196.991	191.223	202.513	423.693	377.061	400.039	392.853
sp|Q9Y305-4|ACOT9_HUMAN	sp	Q9Y305-4	HUMAN	ACOT9	Isoform 4 of Acyl-coenzyme A thioesterase 9, mitochondrial	29	23	1	0	25	18	16	26	3014.31	3181.61	3191.16	3164.54	3049.71	3340.03	3186.29	3314.26	3243.76	3223.01	3464.04	3142.18	3174.21	3224.9	3232.32	3272.26	2150.37	2204	2176.35	2119.73	2161.32	2360.24	2179.97	2168.48	2162.04	2264.65	2482.72	2251.28	2156.14	2180.82	2187.34	2149.98	4826.17	4540.6	4475.61	4420.06
sp|Q15067|ACOX1_HUMAN	sp	Q15067	HUMAN	ACOX1	Peroxisomal acyl-coenzyme A oxidase 1	13	12	1	0	8	14	14	20	970.183	947.861	880.64	876.157	822.997	885.142	933.442	899.125	842.21	821.925	811.461	982.649	943.425	977.259	949.907	901.994	666.053	566.645	555.954	541.439	511.693	582.612	565.603	556.087	546.177	570.082	607.411	554.954	613.507	622.762	624.6	580.69	1345.83	1319.41	1333.32	1415.17
sp|O15254|ACOX3_HUMAN	sp	O15254	HUMAN	ACOX3	Peroxisomal acyl-coenzyme A oxidase 3	4	4	1	0	11	14	9	15	381.008	344.406	361.163	381.41	401.392	403.491	349.029	365.715	351.149	345.874	345.903	360.852	374.334	341.809	388.765	372.445	285.245	253.558	272.782	277.608	276.034	289.097	264.354	247.419	253.984	273.024	321.072	268.694	291.321	266.291	300.653	278.942	1356.28	1461.31	1430.52	1363.9
sp|P24666|PPAC_HUMAN	sp	P24666	HUMAN	ACP1	Low molecular weight phosphotyrosine protein phosphatase	20	13	1	0	14	13	13	8	1685.22	1795.98	1821.22	1820.52	1780.08	1634.17	1835.29	1834.19	1873.8	1760.74	1661.74	1943.77	1918.17	1914.29	1722.13	1677.2	1043.01	940.537	1084.72	1044.94	1133.99	1091.24	975.392	1069.01	1124.38	1111.79	1129.02	1040.12	1013.49	1107.87	1027.64	992.078	1041.17	1107.88	1059.43	995.815
sp|P11117|PPAL_HUMAN	sp	P11117	HUMAN	ACP2	Lysosomal acid phosphatase	2	2	1	0	8	6	5	9	111.282	125.539	115.931	107.113	124.745	131.437	123.016	123.84	124.232	110.204	120.351	111.122	119.84	132.731	121.627	132.86	155.873	162.834	155.325	150.687	150.314	171.351	164.631	155.715	159.164	163.604	171.699	163.389	145.249	163.801	139.755	167.986	969.646	985.919	1027.34	969.101
sp|P13686|PPA5_HUMAN	sp	P13686	HUMAN	ACP5	Tartrate-resistant acid phosphatase type 5	1	0	0	1	2	0	0	0	25.4312	22.8383	19.8839	18.7245	17.3479	16.4316	24.4321	23.5119	17.5934	23.786	16.1983	23.8893	20.1374	25.7928	20.2456	21.765	0	0	0	0	0	0	0	0	0	0	0	0	0	0	0	0	144.954	120.248	119.97	133.526
sp|P15309-2|PPAP_HUMAN	sp	P15309-2	HUMAN	ACPP	Isoform 2 of Prostatic acid phosphatase	1	2	1	0	0	0	1	0	37.6146	28.0337	32.3777	40.9017	25.8014	36.7168	39.4824	27.8338	34.5707	32.9814	36.1882	38.0644	39.4838	38.4403	37.9967	39.3061	41.5989	51.7453	48.0515	45.3919	42.6442	47.6021	46.504	46.4146	45.932	45.6303	60.6	53.9365	51.8788	48.7633	53.6934	60.727	0	0	0	0
sp|Q96CM8-2|ACSF2_HUMAN	sp	Q96CM8-2	HUMAN	ACSF2	Isoform 2 of Acyl-CoA synthetase family member 2, mitochondrial	6	7	1	0	8	10	10	10	746.254	619.111	671.377	652.891	598.513	735.336	640.755	632.381	666.835	627.845	699.75	684.266	693.966	706.929	694.757	836.389	351.481	245.545	314.484	285.23	251.019	271.569	270.532	284.171	256.084	286.153	284.487	320.767	285.836	320.899	334.109	354.457	930.093	990.091	1014.7	895.406
sp|Q4G176|ACSF3_HUMAN	sp	Q4G176	HUMAN	ACSF3	Acyl-CoA synthetase family member 3, mitochondrial	1	3	1	0	1	8	7	6	62.0622	69.7492	70.6308	66.0664	60.7274	73.6696	67.8271	74.0911	67.7389	74.1657	68.6139	69.3141	65.361	76.4277	64.0497	77.246	141.264	137.843	150.144	133.431	140.614	137.075	137.184	152.519	135.737	133.634	147.522	154.627	137.329	143.69	158.081	151.821	71.5391	73.8938	67.31	59.5437
sp|P33121|ACSL1_HUMAN	sp	P33121	HUMAN	ACSL1	Long-chain-fatty-acid--CoA ligase 1	11	14	1	0	10	14	11	9	1040.89	918.122	985.742	940.11	983.347	955.272	949.616	962.794	949.96	981.023	953.824	992.556	1014.6	1006.12	1019.69	1022.87	536.294	515.82	551.269	512.303	505.387	480.338	582.411	558.51	487.616	585.484	580.896	540.051	559.022	529.323	560.986	590.254	1754.54	1650.14	1507.38	1589.67
sp|O95573|ACSL3_HUMAN	sp	O95573	HUMAN	ACSL3	Long-chain-fatty-acid--CoA ligase 3	60	57	1	0	42	47	49	50	4967.35	4669.78	4842.48	4591.75	4443.81	4885.83	4607.95	4811.48	4548.25	4544	4790.91	4536.21	4796.29	5245.34	4910.5	5465.01	5812.66	5752.53	5749.7	5557.22	5512.77	5284.78	5635.39	5676.65	5574.77	5569.58	5432.59	6019.27	5851	5976.51	5961.14	8113.71	8441.31	8596.2	8966.15	8239.44
sp|O60488|ACSL4_HUMAN	sp	O60488	HUMAN	ACSL4	Long-chain-fatty-acid--CoA ligase 4	52	40	1	0	25	27	29	28	4110.71	4072.39	3878.58	3603.74	3346.83	3323.39	4077.24	3903.45	3705.93	3494.96	3449.33	4165.67	4068.99	3594.62	3322.39	3121.79	3414.29	3462.06	3490.23	3287.15	3118.53	3030.38	3604.14	3493.24	3336.65	3214.45	3077.69	3715.61	3700.05	3782.52	3426.34	3440.04	4196.25	4160.87	3652.72	4236.89
sp|Q9ULC5-3|ACSL5_HUMAN	sp	Q9ULC5-3	HUMAN	ACSL5	Isoform 2 of Long-chain-fatty-acid--CoA ligase 5	0	1	0	1	1	1	0	0	0	0	0	0	0	0	0	0	0	0	0	0	0	0	0	0	58.3393	46.052	48.1725	43.6368	43.2043	60.6608	62.2395	50.023	46.6043	44.738	49.0591	46.7028	41.0638	49.8806	51.133	82.9742	352.456	316.815	303.728	353.034
sp|Q9NUB1|ACS2L_HUMAN	sp	Q9NUB1	HUMAN	ACSS1	Acetyl-coenzyme A synthetase 2-like, mitochondrial	1	2	1	0	2	4	3	1	32.1021	31.7064	23.0645	28.0559	24.5322	30.1474	26.5946	29.5025	29.2064	34.1893	27.4678	35.3679	32.7377	30.7935	33.7746	34.3957	178.633	130.822	161.105	143.622	133.053	156.167	154.545	149.375	123.196	150.117	155.379	165.818	169.552	165.905	181.613	158.588	230.676	218.481	210.976	208.598
sp|Q9NR19-2|ACSA_HUMAN	sp	Q9NR19-2	HUMAN	ACSS2	Isoform 2 of Acetyl-coenzyme A synthetase, cytoplasmic	2	9	1	0	13	9	10	12	188.022	142.482	151.936	149.151	148.57	160.401	151.181	143.925	153.312	151.241	155.04	166.714	163.846	179.522	184.707	167.406	638.055	604.016	572.224	548.819	552.483	570.975	587.709	567.059	560.144	546.55	573.821	599.964	622.612	620.94	642.873	682.33	1506.57	1543.05	1618.46	1536.74
sp|P62736|ACTA_HUMAN	sp	P62736	HUMAN	ACTA2	Actin, aortic smooth muscle	221	200	1	0	531	395	329	490	24180.1	25318.5	24614.8	24273.4	25473.9	24691.3	24733.6	24695.3	24295.2	24483.5	23528.9	25093.7	25368.2	26188.9	26824.5	25042.3	19082.6	19670.7	18646	18905.2	19484.8	19457	19244.7	18900.3	19096.9	19171.9	18803.3	18790.4	18727.3	18928.3	18957.6	18766.7	103578	104455	108709	120326
sp|Q562R1|ACTBL_HUMAN	sp	Q562R1	HUMAN	ACTBL2	Beta-actin-like protein 2	5	7	1	0	8	2	2	3	533.135	541.46	542.621	525.923	551.887	528.948	533.776	477.311	514.227	574.129	440.878	489.914	523.841	505.622	666.446	458.279	1155.04	1078.7	1054.38	1134.95	1109.57	1148.45	1094.16	1073.66	1074.93	1105.97	1096.18	1061.13	1127.46	1093.73	1315.93	973.587	1527.7	1505.62	1154.24	1902.06
sp|P63261|ACTG_HUMAN	sp	P63261	HUMAN	ACTG1	Actin, cytoplasmic 2	208	155	1	0	461	533	334	380	12272	12544.1	12534.6	12409.2	12853.6	12338.1	12656.5	12522.7	12226	12228.8	12046.4	12961.6	12721.1	13597.1	13175.2	13526	9608.79	9072.29	9384.24	9455.93	9592.84	9547.48	9616.01	9616.04	9576.4	9561.45	9272.37	9698.42	9478.6	9767.93	9340.59	9553.04	36330.3	36534.6	41519	38405
sp|O96019|ACL6A_HUMAN	sp	O96019	HUMAN	ACTL6A	Actin-like protein 6A	14	13	1	0	15	16	11	20	1303.95	1185.36	1270.28	1276.32	1219.99	1281.65	1204.27	1203.14	1275.04	1303.85	1255.49	1224.11	1228.02	1257.58	1205.86	1142.83	969.552	780.669	1018.95	983.543	945.42	926.911	960.67	940.974	950.302	990.117	865.934	992.385	935.458	972.799	916.424	904.694	1748.68	1557.06	1553.95	1639.35
sp|P12814|ACTN1_HUMAN	sp	P12814	HUMAN	ACTN1	Alpha-actinin-1	3	2	1	0	1	1	2	2	92.7351	85.6056	90.6938	82.8181	83.3836	80.5656	102.293	92.3825	100.885	83.3429	75.993	105.757	90.125	100.117	101.312	98.1769	88.2021	47.9673	85.6496	70.7425	63.4879	8.25711	63.9595	77.2952	75.8618	67.6919	34.0939	84.1464	63.1621	71.133	73.8185	79.1306	42.8765	26.5089	33.068	36.1296
sp|P12814-3|ACTN1_HUMAN	sp	P12814-3	HUMAN	ACTN1	Isoform 3 of Alpha-actinin-1	3	2	1	0	10	8	9	9	118.973	111.761	109.043	129.295	118.032	96.1256	124.516	111.8	112.903	119.988	106.091	107.955	117.042	106.26	132.275	110.124	121.053	111.136	102.922	107.746	107.689	171.489	126.322	102.851	140.288	113.591	178.432	98.7022	103.806	124.523	123.196	140.975	1425.22	1344.58	1608.64	1393.6
sp|P12814-4|ACTN1_HUMAN	sp	P12814-4	HUMAN	ACTN1	Isoform 4 of Alpha-actinin-1	304	245	1	0	335	268	269	305	33291.6	33621.8	33195.2	33373.8	33488.4	31011.9	33481.5	33124.2	32886.5	32607.3	31158.9	33561	34017.4	35195.4	35889.5	35784.6	24704.8	24283.8	24172.1	24734.8	24512.1	23048.9	24132.2	24704.8	24375.5	23713	21956.6	24159.3	24240.4	24334.7	24592.9	24497.8	51032.7	55476.7	55600.9	54300.2
sp|P35609-2|ACTN2_HUMAN	sp	P35609-2	HUMAN	ACTN2	Isoform 2 of Alpha-actinin-2	3	2	1	0	0	0	0	0	560.173	528.544	550.035	556.176	535.606	501.362	562.316	567.562	553.358	580.465	513.078	563.511	542.29	579.854	630.179	577.509	38.2315	36.3581	35.0689	47.477	40.1042	53.7393	36.9057	38.9485	35.4398	35.9428	36.014	41.8654	42.1079	36.6151	41.1714	35.6337	0	0	0	0
sp|O43707|ACTN4_HUMAN	sp	O43707	HUMAN	ACTN4	Alpha-actinin-4	180	156	1	0	231	144	115	190	18908.9	19553.3	18941.9	18763.5	18691.3	17325.2	19088.8	19008.1	18829	18096.7	17486.6	19185.6	19249.2	20113.3	20288.3	20569.3	15470	15684.6	15531.1	15554.1	15652.7	14529.3	15332.9	15489.2	15676.1	14740.5	13278.8	15743.1	15488.6	15394.3	15395.2	15442.6	33636.5	36109.6	35693	36814.1
sp|Q9NZ32|ARP10_HUMAN	sp	Q9NZ32	HUMAN	ACTR10	Actin-related protein 10	9	11	1	0	10	10	9	8	942.163	936.841	890.917	866.938	914.087	992.457	2264.78	1199.36	865.07	902.236	909.624	1055.28	859.449	875.756	1190.11	890.351	1002.18	930.786	895.474	864.996	878.422	1020.28	914.937	921.563	894.498	920.718	917.183	904.315	966.953	962.262	1036.19	949.935	2251.4	2408.13	2466.01	2311.73
sp|P61163|ACTZ_HUMAN	sp	P61163	HUMAN	ACTR1A	Alpha-centractin	52	49	1	0	28	29	22	37	4970.15	4552.03	4558.01	4533.15	4730.38	4706.96	4570.46	4546.06	4457.92	4685.59	4626.31	4841.19	4767.8	4901.62	5201	4949.24	5300.46	4829.51	4960.9	4928.63	5084.34	5408.67	4995.05	5075.78	5036.44	5045.25	5010.47	5139.08	5026.41	5239.95	5152.65	5223.54	4825.74	4694.48	5048.61	4811.35
sp|P42025|ACTY_HUMAN	sp	P42025	HUMAN	ACTR1B	Beta-centractin	5	3	1	0	3	3	4	4	258.322	261.65	265.712	258.198	273.647	284.527	266.477	253.064	261.458	251.509	271.616	296.805	274.486	274.847	259.742	327.896	273.888	204.611	236.765	240.049	235.888	234.859	230.001	239.343	231.123	230.983	256.199	270.705	236.486	305.495	251.395	259.059	799.081	848.326	1189.25	848.132
sp|P61160|ARP2_HUMAN	sp	P61160	HUMAN	ACTR2	Actin-related protein 2	70	44	1	0	45	35	33	56	7711.26	7799.02	7798.3	7525.07	7579.47	7165.77	7830.72	7711.9	7502.25	7448.23	7267.98	8007.17	7971.95	8177.26	7809.77	7707.41	5047.83	4464.51	4866.91	4867.84	4835.41	4812.71	4843.1	4810.17	4861.07	4781.1	4760.08	5050.19	4991.9	4994.25	5067.74	4797.98	8196.3	8405.31	8061.17	8572.48
sp|P61158|ARP3_HUMAN	sp	P61158	HUMAN	ACTR3	Actin-related protein 3	75	74	1	0	53	59	48	55	7878.13	8085.09	7936.88	7689.34	7909.73	7524.04	8060.99	8012.61	7633.69	7545	7504.81	8365.31	8128.39	8467.98	8642.37	8163.06	5855.27	4829.55	5746.76	5601.17	5566.45	5506.34	5736.08	5582.83	5542.64	5470.44	5374.24	5919.49	5717.26	5751.01	5760.13	5914.56	7584.42	8256.71	7571.27	8770.59
sp|Q9H9F9|ARP5_HUMAN	sp	Q9H9F9	HUMAN	ACTR5	Actin-related protein 5	3	4	1	0	4	5	5	4	121.512	108.405	118.187	104.265	107.586	109.967	130.422	122.601	106.727	119.553	118.294	119.41	121.03	106.651	116.383	108.06	157.584	86.1483	157.147	135.918	165.465	159.035	157.649	142.219	141.658	147.35	153.565	162.904	147.065	153.728	152.004	134.537	473.693	390.973	517.455	486.239
sp|Q9GZN1|ARP6_HUMAN	sp	Q9GZN1	HUMAN	ACTR6	Actin-related protein 6	1	0	0	1	1	5	5	3	12.5731	14.9086	11.4296	18.6339	14.8053	14.2436	15.8919	13.5111	20.5297	13.4842	24.2999	14.6249	15.6929	13.8484	17.0164	17.6148	0	0	0	0	0	0	0	0	0	0	0	0	0	0	0	0	121.955	123.226	109.631	123.979
sp|Q9H981|ARP8_HUMAN	sp	Q9H981	HUMAN	ACTR8	Actin-related protein 8	9	5	1	0	4	3	4	5	800.173	834.253	806.148	730.969	703.403	658.856	874.678	795.504	777.416	824.522	819.182	840.787	749.971	710.184	665.027	655.376	252.251	273.229	241.044	256.619	229.248	216.22	254.652	275.007	256.764	260.883	277.479	257.483	259.289	233.337	244.298	235.214	274.679	333.019	338.362	289.384
sp|Q04771|ACVR1_HUMAN	sp	Q04771	HUMAN	ACVR1	Activin receptor type-1	1	0	0	1	2	6	4	3	24.5278	22.8502	18.2375	19.8708	14.2012	21.6449	26.4229	22.0422	19.7119	20.2773	24.4722	13.8045	15.0755	21.6	22.7592	25.4635	0	0	0	0	0	0	0	0	0	0	0	0	0	0	0	0	326.733	264.356	260.918	257.36
sp|Q03154|ACY1_HUMAN	sp	Q03154	HUMAN	ACY1	Aminoacylase-1	10	12	1	0	7	12	8	11	708.405	710.076	742.294	707.536	735.041	612.616	743.198	717.067	690.841	652.608	585.327	771.866	763.219	836.166	775.348	744.946	725.01	665.174	662.889	667.584	676.25	688.216	670.261	682.49	667.33	651.935	640.248	715.806	695.812	707.397	719.545	676.049	835.914	952.399	881.472	1013.66
sp|P07311|ACYP1_HUMAN	sp	P07311	HUMAN	ACYP1	Acylphosphatase-1	6	8	1	0	2	3	5	5	391.409	410.386	367.977	367.386	392.183	372.417	401.889	380.44	382.591	355.653	382.482	393.58	391.755	430.466	431.278	504.025	568.306	491.538	568.981	579.81	555.187	536.09	570.784	548.607	588.426	533.838	514.978	572.807	548.602	548	573.714	746.722	153.456	145.232	184.995	185.566
sp|P14621|ACYP2_HUMAN	sp	P14621	HUMAN	ACYP2	Acylphosphatase-2	2	1	1	0	4	2	2	3	325.023	289.342	290.958	271.22	294.658	272.01	276.343	293.256	270.866	288.907	266.966	299.153	300.885	303.094	296.949	317.867	113.292	104.655	116.127	104.373	112.947	98.1515	101.201	107.647	108.602	116.663	106.625	105.851	106.763	103.285	95.5185	121.149	879.408	1008.38	947.807	924.301
sp|P00813|ADA_HUMAN	sp	P00813	HUMAN	ADA	Adenosine deaminase	8	12	1	0	24	15	13	14	777.813	740.749	724.76	742.633	683.083	755.547	719.744	722.797	747.239	614.159	730.533	755.151	805.919	805.107	789.87	846.564	1469.31	1259.28	1335.86	1358.73	1289.92	1344.04	1281.72	1285.89	1322.35	1200.9	1305.56	1390.56	1415.79	1422.57	1465.21	1355.08	4882.46	4367.28	4306.3	4107.43
sp|Q6DHV7|ADAL_HUMAN	sp	Q6DHV7	HUMAN	ADAL	Adenosine deaminase-like protein	2	0	0	1	4	2	2	1	174.889	154.901	156.141	163.284	153.974	136.774	172.346	149.956	148.318	132.306	143.143	176.064	171.094	179.916	172.627	171.809	0	0	0	0	0	0	0	0	0	0	0	0	0	0	0	0	802.197	784.365	813.391	778.967
sp|O14672|ADA10_HUMAN	sp	O14672	HUMAN	ADAM10	Disintegrin and metalloproteinase domain-containing protein 10	2	9	1	0	11	20	15	8	54.6326	45.8078	53.096	48.0973	41.5033	42.8785	59.2846	63.7193	52.7331	37.3932	42.9368	50.9323	50.504	50.4503	45.9688	45.0735	441.242	618.311	448.996	330.143	238.42	220.413	508.51	427.136	316.613	286.225	276.843	571.908	546.153	501.993	435.147	402.493	1228.42	1178.9	1228.27	1139.96
sp|P78536|ADA17_HUMAN	sp	P78536	HUMAN	ADAM17	Disintegrin and metalloproteinase domain-containing protein 17	1	1	1	0	10	8	11	10	16.6972	16.09	15.1323	16.2686	13.1396	18.8645	11.0623	15.2753	16.4542	18.9946	22.0182	13.9276	18.5052	15.1113	12.9828	16.8399	44.126	78.8089	54.8261	48.5202	37.746	35.5133	51.3322	47.4173	47.046	42.4478	51.0002	52.6086	63.149	63.2547	59.0154	63.3705	1929.41	1740.14	1746.5	1727.9
sp|Q9H013|ADA19_HUMAN	sp	Q9H013	HUMAN	ADAM19	Disintegrin and metalloproteinase domain-containing protein 19	2	0	0	1	1	1	0	1	114.994	129.198	107.419	111.247	101.858	107.858	115.761	106.257	98.3987	90.8401	96.4277	108.951	114.922	113.166	113.899	109.354	0	0	0	0	0	0	0	0	0	0	0	0	0	0	0	0	61.9166	56.2421	52.2683	51.9556
sp|Q13443|ADAM9_HUMAN	sp	Q13443	HUMAN	ADAM9	Disintegrin and metalloproteinase domain-containing protein 9	6	15	1	0	22	18	20	19	446.677	379.711	352.188	305.514	270.899	293.202	405.284	345.535	292.857	251.081	274.979	401.318	362.317	329.917	264.168	261.488	804.943	877.477	733.768	580.286	527.738	435.102	821.528	647.38	582.743	508.324	441.401	972.528	958.084	858.647	727.032	572.418	3367.76	2989.44	3199.63	3043.19
sp|Q9UHI8|ATS1_HUMAN	sp	Q9UHI8	HUMAN	ADAMTS1	A disintegrin and metalloproteinase with thrombospondin motifs 1	9	6	1	0	10	5	11	14	1262.05	1126	887.168	723.723	704.647	750.617	1077.79	946.529	760.011	885.538	1099.57	1469.57	1185.19	1309.87	990.903	1385.64	560.604	430.132	365.306	320.704	303.598	400.359	403.504	338.295	324.466	341.434	535.628	520.325	599.291	483.11	374.528	504.154	1511.61	1497.36	1189.37	1453.7
sp|Q8WXS8-4|ATS14_HUMAN	sp	Q8WXS8-4	HUMAN	ADAMTS14	Isoform D of A disintegrin and metalloproteinase with thrombospondin motifs 14	1	0	0	1	2	0	0	0	16.8019	17.6089	13.8377	13.3458	17.5444	18.0601	16.2513	16.0762	15.3915	17.6921	14.8278	20.1645	20.5	15.9529	19.298	17.8234	0	0	0	0	0	0	0	0	0	0	0	0	0	0	0	0	160.669	146.006	124.204	160.101
sp|Q8TE57|ATS16_HUMAN	sp	Q8TE57	HUMAN	ADAMTS16	A disintegrin and metalloproteinase with thrombospondin motifs 16	0	1	0	1	1	1	1	1	0	0	0	0	0	0	0	0	0	0	0	0	0	0	0	0	100.7	94.4965	104.297	91.0064	94.0656	87.0702	90.3691	93.1927	92.9746	96.4317	94.3993	114.354	106.861	102.313	94.418	102.429	99.1604	76.4651	65.2147	61.1682
sp|O75173|ATS4_HUMAN	sp	O75173	HUMAN	ADAMTS4	A disintegrin and metalloproteinase with thrombospondin motifs 4	1	0	0	1	5	2	2	5	16.5103	16.9996	18.892	17.5771	17.2267	17.7484	15.3196	17.5513	14.0018	25.4874	23.8996	15.941	15.4704	23.2234	18.8544	19.6415	0	0	0	0	0	0	0	0	0	0	0	0	0	0	0	0	390.844	409.944	395.944	390.678
sp|Q8N6G6|ATL1_HUMAN	sp	Q8N6G6	HUMAN	ADAMTSL1	ADAMTS-like protein 1	1	0	0	1	1	3	2	0	76.107	72.2045	63.8153	52.3319	44.4318	58.1655	55.5051	74.1617	58.3695	56.1511	66.2686	82.0011	81.8398	83.9433	57.7419	55.3511	0	0	0	0	0	0	0	0	0	0	0	0	0	0	0	0	153.145	163.639	132.029	149.291
sp|P55265-4|DSRAD_HUMAN	sp	P55265-4	HUMAN	ADAR	Isoform 4 of Double-stranded RNA-specific adenosine deaminase	45	42	1	0	53	56	51	52	5730.9	5632.39	5572.63	5342.88	5210.9	5238.58	5844.69	5499.39	5120.61	5149.13	4861.17	5908.55	5774.75	5769.41	5876.87	6439.42	3788.69	3664.32	3523.29	3478.06	3576.34	3592.02	3577.97	3616.92	3400.53	3358.21	3350.22	3674.59	3676	3917.7	4338.52	4869.12	9988.89	10148.8	10796.9	10252.5
sp|P78563-5|RED1_HUMAN	sp	P78563-5	HUMAN	ADARB1	Isoform 5 of Double-stranded RNA-specific editase 1	1	2	1	0	2	3	7	2	20.7947	17.1557	26.0165	16.6002	19.2675	19.1532	17.396	25.4867	15.5519	23.7011	18.2814	26.4991	26.3534	29.6276	19.8653	17.653	41.158	42.0796	48.1485	45.141	46.4084	52.048	51.6095	40.0421	42.0393	39.9476	37.7191	44.2329	41.4073	35.7505	40.3046	44.0469	266.194	310.386	284.752	287.786
sp|Q7Z6V5|ADAT2_HUMAN	sp	Q7Z6V5	HUMAN	ADAT2	tRNA-specific adenosine deaminase 2	0	1	0	1	3	2	3	1	0	0	0	0	0	0	0	0	0	0	0	0	0	0	0	0	36.2314	39.5122	35.6126	43.3422	36.6461	34.6683	45.4244	42.7419	40.8782	42.8483	46.2976	43.394	37.9917	42.0943	36.9926	33.7125	438.296	387.37	361.843	374.915
sp|O60503|ADCY9_HUMAN	sp	O60503	HUMAN	ADCY9	Adenylate cyclase type 9	1	2	1	0	6	6	2	14	39.9877	28.661	33.8162	36.1772	30.6402	42.0338	32.484	36.7197	37.261	35.9805	30.7004	28.5109	27.8152	30.9563	31.444	26.4233	39.0473	42.5137	50.9524	36.3612	38.0299	31.4525	47.4212	37.3202	36.698	37.3358	32.2825	37.7374	38.1604	39.5775	37.7147	40.0802	1210.15	1195.66	1255.41	1165.93
sp|P35611-3|ADDA_HUMAN	sp	P35611-3	HUMAN	ADD1	Isoform 3 of Alpha-adducin	17	20	1	0	27	24	16	17	1694.88	1452.18	1382.27	1322.31	1209.15	1355.31	1536.1	1419.46	1303.36	1191.78	1299.79	1621.69	1545.99	1408.16	1342.99	1418.85	2244.76	1906.95	1834.55	1747.19	1715.45	1682.31	1811.36	1799.26	1756.72	1784.66	1769.07	1980.2	2068.61	2052.86	2174.12	2118.5	3925.5	4459.72	4538	3894.14
sp|Q9UEY8-2|ADDG_HUMAN	sp	Q9UEY8-2	HUMAN	ADD3	Isoform 1 of Gamma-adducin	23	36	1	0	12	28	18	21	2350.67	2001.38	2036.39	2021.08	1814.97	2141.35	2105.14	1940.46	1936.65	1847.31	2024.18	2303.5	2219.6	2110.6	2099.35	2195.64	3390.3	2807.4	2971.79	2850.83	2735.77	2776.54	3282.45	2885.28	2796.36	2757.67	2894.48	3240.78	3162.67	3245.48	3386.25	3342.43	2026.77	2030.57	2236.7	1906.47
sp|P00325|ADH1B_HUMAN	sp	P00325	HUMAN	ADH1B	Alcohol dehydrogenase 1B	3	6	1	0	9	0	0	0	314.76	249.242	288.141	287.448	260.575	377.293	279.037	221.895	266.036	301.369	428.143	315.552	303.97	338.104	274.207	442.294	762.851	499.842	518.062	543.333	441.931	695.694	491.34	424.202	459.402	555.458	685.728	535.344	626.001	530.36	653.988	657.148	1727.66	1560.02	1508.28	1472.65
sp|P11766|ADHX_HUMAN	sp	P11766	HUMAN	ADH5	Alcohol dehydrogenase class-3	62	55	1	0	53	32	33	37	8983.06	8037.8	8251.16	8450.42	8428.49	8508.3	8259.53	8176.93	8387.52	8633.6	8631.5	8277.88	8706.61	9385.76	9529.09	9845.09	6901.18	6369.36	6262.99	6262.18	6473.01	6712.15	6106.1	6179.21	6346.14	6219.1	6274.21	6317.38	6579.28	6721.4	6680.48	6762.56	11629.9	12366.4	11432.8	12417
sp|Q9BV57|MTND_HUMAN	sp	Q9BV57	HUMAN	ADI1	1,2-dihydroxy-3-keto-5-methylthiopentene dioxygenase	16	9	1	0	5	9	7	4	1922.1	1859.03	1802.25	1624.1	1503.53	1311.36	1776.16	1749.41	1678.32	1509.14	1343.1	1953.69	1863.54	1744.18	1724.02	1462.99	1019.37	979.737	1006.78	876.224	854.775	654.956	1023.23	996.004	892.87	793.491	592.348	1132.68	1083.78	1009.87	899.018	773.979	1117.97	935.973	950.389	930.702
sp|Q15847|ADIRF_HUMAN	sp	Q15847	HUMAN	ADIRF	Adipogenesis regulatory factor	2	6	1	0	5	2	4	4	171.269	131.302	139.804	153.389	148	137.954	129.263	140.711	152.528	148.699	150.78	165.624	163.744	161.275	158.008	169.594	364.629	289.511	348.951	318.747	345.443	357.21	317.769	336.982	331.614	306.304	309.054	345.816	356.991	363.423	381.227	337.891	1482.38	1404.14	1354.82	1517.1
sp|P55263|ADK_HUMAN	sp	P55263	HUMAN	ADK	Adenosine kinase	39	35	1	0	19	22	29	23	5316.3	5102.73	4951.24	5073.8	4985.51	4869.58	5042.57	5144.53	5092.66	4967.04	5023.13	5365.61	5288.14	5530.5	5401.32	5512	3474.71	3117.28	3304.49	3355.5	3515.95	3525.77	3515.95	3452.1	3411.26	3291.03	3141.17	3480.96	3512.27	3483.99	3569.4	3276.2	3233.02	3085.58	3102.15	3136.49
sp|Q9H2P0|ADNP_HUMAN	sp	Q9H2P0	HUMAN	ADNP	Activity-dependent neuroprotector homeobox protein	15	7	1	0	21	23	22	16	1735.18	1678.72	1655.1	1606.93	1581.61	1618.11	1658.65	1628.76	1606.78	1638.67	1647.07	1800.37	1735.04	1647.82	1552.62	1675.33	644.822	568.175	594.941	628.484	587.912	532.65	604.034	595.455	600.524	584.325	587.869	631.919	630.62	560.787	581.811	477.081	3326.45	3536.19	3374.41	3271.9
sp|Q6IQ32|ADNP2_HUMAN	sp	Q6IQ32	HUMAN	ADNP2	ADNP homeobox protein 2	1	1	1	0	2	1	2	0	122.876	130.602	118.882	103.915	106.393	102.512	157.165	124.208	119.453	147.509	98.3895	129.691	122.305	101.637	122.215	150.207	50.6351	57.7324	53.87	48.4995	52.1394	46.1755	55.6975	53.0485	50.3941	52.3199	57.0989	48.4442	57.0284	49.2293	51.2482	55.5732	481.235	488.598	455.191	494.887
sp|Q96SZ5|AEDO_HUMAN	sp	Q96SZ5	HUMAN	ADO	2-aminoethanethiol dioxygenase	3	4	1	0	10	8	4	8	113.158	108.354	117.495	115.782	108.575	111.085	106.967	108.853	113.524	125.819	120.363	112.357	120.3	111.348	122.006	105.055	142.36	123.461	137.568	139.92	137.815	130.678	124.34	145.413	126.284	130.426	125.195	116.888	142.708	153.041	134.538	123.903	1299.79	1620.06	1720.28	1358.86
sp|Q9BRR6|ADPGK_HUMAN	sp	Q9BRR6	HUMAN	ADPGK	ADP-dependent glucokinase	4	5	1	0	4	7	5	6	333.987	302.915	346.555	323.778	309.487	366.767	315.652	298.286	331.582	321.391	361.39	328.492	338.111	356.919	321.54	386.038	387.443	368.957	391.116	378.484	341.258	378.127	375.013	385.436	375.885	357.268	405.136	381.927	383.592	360.056	411.434	390.9	402.112	493.236	480.726	489.671
sp|Q9NX46|ARHL2_HUMAN	sp	Q9NX46	HUMAN	ADPRHL2	Poly(ADP-ribose) glycohydrolase ARH3	4	12	1	0	2	7	10	7	219.677	216.355	227.977	228.536	207.394	219.671	220.506	213.287	219.885	221.798	231.06	227.026	230.827	238.865	227.222	257.333	761.767	759.737	773.389	780.277	767.759	759.502	781.71	761.065	782.296	777.745	753.523	786.303	804.179	781.512	836.846	885.28	240.398	231.624	267.936	222.514
sp|Q16186|ADRM1_HUMAN	sp	Q16186	HUMAN	ADRM1	Proteasomal ubiquitin receptor ADRM1	20	24	1	0	17	9	14	21	1926.1	1810.23	1790.75	1783.31	1754.14	1656.16	1835.51	1830.2	1745.84	1778.24	1653.12	1916.83	2028.38	2052.39	1991.92	1979.14	2614.03	2130.06	2252.03	2312.14	2251.72	2279.18	2376.36	2243.82	2179.66	2187.36	2134.25	2490.28	2435.88	2408.34	2400.41	2452.71	3543.58	3861.57	3754.42	3755.33
sp|P30566|PUR8_HUMAN	sp	P30566	HUMAN	ADSL	Adenylosuccinate lyase	28	26	1	0	16	26	17	22	2759.95	2617.6	2551.68	2603.18	2610.37	2423.64	2599.2	2603.9	2543.85	2447.15	2459.08	2938.28	2824.23	2755.71	2780.95	2808.3	3014.28	2833.07	2995.57	3046.25	3073.17	2900.37	3044.09	2910.53	2988.45	2946.03	2719.23	3034.75	3053.8	3038.24	3097.77	2864.73	4510.46	4499.76	5059.75	4690.8
sp|P30520|PURA2_HUMAN	sp	P30520	HUMAN	ADSS	Adenylosuccinate synthetase isozyme 2	56	48	1	0	22	28	22	27	4968.31	4835.41	4796.2	4726.87	4645.46	4328.39	4809.31	4783.12	4683.44	4613.8	4517.53	5101.06	4953.54	5045.46	5128.13	5058.14	4384.16	4181.18	4423.04	4332.01	4306.12	4005.48	4441.95	4444.13	4351.55	4083.75	3716.22	4512.26	4343.66	4509.85	4468.72	4445.14	3106.33	3369.7	3043.92	3195.73
sp|Q8N142|PURA1_HUMAN	sp	Q8N142	HUMAN	ADSSL1	Adenylosuccinate synthetase isozyme 1	1	0	0	1	2	0	1	0	31.2403	30.0807	29.7652	30.209	38.8093	30.2118	38.3341	29.4734	28.8843	29.1337	31.9344	30.382	38.4915	36.2948	28.6924	39.3588	0	0	0	0	0	0	0	0	0	0	0	0	0	0	0	0	187.18	183.266	182.949	176.851
sp|Q8N142-2|PURA1_HUMAN	sp	Q8N142-2	HUMAN	ADSSL1	Isoform 2 of Adenylosuccinate synthetase isozyme 1	1	0	0	1	5	2	2	1	112.21	108.377	110.102	100.669	127.701	97.9113	107.597	121.973	114.812	98.9415	106.242	128.322	108.224	124.852	128.257	113.603	0	0	0	0	0	0	0	0	0	0	0	0	0	0	0	0	646.701	690.49	619.401	574.609
sp|Q8IUX7|AEBP1_HUMAN	sp	Q8IUX7	HUMAN	AEBP1	Adipocyte enhancer-binding protein 1	0	1	0	1	7	6	8	2	0	0	0	0	0	0	0	0	0	0	0	0	0	0	0	0	48.853	44.2105	51.233	41.9849	40.0739	45.9768	45.5238	54.7858	48.3951	47.0158	48.1001	41.8619	42.6644	46.5929	44.3258	44.9429	674.454	662.066	649.698	647.447
sp|Q8WTP8-2|AEN_HUMAN	sp	Q8WTP8-2	HUMAN	AEN	Isoform 2 of Apoptosis-enhancing nuclease	1	0	0	1	0	1	0	1	33.0206	38.5126	15.027	12.7939	12.5128	12.9275	34.7829	21.4971	26.5721	33.5244	37.476	69.4	40.2115	20.4752	40.2583	37.9538	0	0	0	0	0	0	0	0	0	0	0	0	0	0	0	0	0	0	0	0
sp|Q08117-2|AES_HUMAN	sp	Q08117-2	HUMAN	AES	Isoform 2 of Amino-terminal enhancer of split	0	2	0	1	2	0	0	3	0	0	0	0	0	0	0	0	0	0	0	0	0	0	0	0	132.39	79.113	69.8643	51.6128	48.7267	39.3797	82.3125	59.8549	54.7547	48.0031	34.992	102.681	125.046	119.602	103.155	86.7206	483.453	523.301	509.443	512.603
sp|Q8N556-2|AFAP1_HUMAN	sp	Q8N556-2	HUMAN	AFAP1	Isoform 2 of Actin filament-associated protein 1	19	18	1	0	15	18	15	12	1692.68	1911.56	1814.53	1697.43	1771.7	1615.37	1883.16	1781.56	1810.09	1937.79	1832.26	1966.84	1874.24	1834.16	1951.37	2113.03	1469.67	1536.77	1404.44	1485.18	1432.33	1378.98	1568.81	1517.11	1477.7	1604.51	1571.29	1494.55	1617.13	1509.33	1649.76	2824.92	1965.75	1942.22	1756.02	1914.81
sp|P55196-5|AFAD_HUMAN	sp	P55196-5	HUMAN	AFDN	Isoform 5 of Afadin	13	16	1	0	26	27	31	23	1191.77	1134.88	1148.83	1142.16	1112.11	1120.89	1152.68	1171	1136.99	1128.91	1166.01	1157.37	1128.99	1251.52	1142.06	1234.29	1140.54	1160.85	1122.65	1153.67	1098.53	1027.54	1151.05	1096.43	1118.6	1139.59	1063.15	1145.1	1141.76	1111.15	1165.96	1150.31	3389.74	3262.73	3222.96	3113.46
sp|P51826-2|AFF3_HUMAN	sp	P51826-2	HUMAN	AFF3	Isoform 2 of AF4/FMR2 family member 3	2	1	1	0	2	4	1	2	470.8	455.796	486.104	414.033	433.151	367.269	473.277	443.547	428.328	471.427	397.071	490.771	488.148	471.013	511.041	386.857	423.845	306.251	425.192	357.169	385.567	375.86	427.569	343.204	384.72	368.407	367.158	490.211	389.671	402.196	484.743	344.565	228.719	192.91	255.95	207.389
sp|Q9UHB7|AFF4_HUMAN	sp	Q9UHB7	HUMAN	AFF4	AF4/FMR2 family member 4	12	13	1	0	17	10	6	21	1147.48	1320.22	1317.67	1312.06	1229.36	1227.18	1305.72	1300.7	1394.01	1484.93	1530.14	1258.31	1095.38	1170.13	1258.99	1198.39	1020.51	1128.86	1146.2	1169	1045.14	1096.56	1153.8	1154.31	1274.22	1327.27	1479.7	1094.23	1133.12	1057.42	1084.79	1241.93	2125.21	2042.23	2112.23	2129.28
sp|Q9Y4W6|AFG32_HUMAN	sp	Q9Y4W6	HUMAN	AFG3L2	AFG3-like protein 2	11	13	1	0	29	22	22	20	1160.21	1107.38	1126.93	1029.99	963.641	1092.48	1051.26	1204.8	1067.91	995.739	1103.34	951.888	1104.88	1177.28	1029.77	1128.5	777.457	1145.12	983.509	927.222	713.031	639.709	871.404	847.241	806.091	786.343	831.95	814.123	904.882	915.85	778.66	853.442	4924.15	4377.71	4738.56	4850.96
sp|P02771|FETA_HUMAN	sp	P02771	HUMAN	AFP	Alpha-fetoprotein	2	1	1	0	0	2	2	1	167.371	156.206	208.92	201.451	320.001	320.125	159.749	187.176	171.937	229.326	280.661	190.565	187.431	163.394	201.481	220.747	229.588	264.023	203.588	257.951	243.334	1110.37	225.252	192.242	415.058	272.441	1322.46	178.916	262.999	293.815	216.212	644.641	0	0	0	0
sp|Q6ULP2|AFTIN_HUMAN	sp	Q6ULP2	HUMAN	AFTPH	Aftiphilin	3	3	1	0	8	10	3	7	65.5295	73.0207	61.4215	60.6385	61.1224	60.4151	68.724	55.6196	68.3255	64.7384	66.4337	73.6304	65.4222	50.0874	49.2864	59.1076	380.914	396.521	351.565	373.204	356.199	334.661	373.145	369.833	357.36	353.904	355.862	369.207	369.286	373.323	344.51	321.483	1395.2	1604.8	1616.61	1478.14
sp|Q96P47-4|AGAP3_HUMAN	sp	Q96P47-4	HUMAN	AGAP3	Isoform 4 of Arf-GAP with GTPase, ANK repeat and PH domain-containing protein 3	0	2	0	1	7	5	3	6	0	0	0	0	0	0	0	0	0	0	0	0	0	0	0	0	244.966	279.74	263.634	255.019	272.158	236.525	261.708	241.35	271.071	265.887	256.152	249.455	257.674	256.866	231.773	225.711	739.58	673.633	659.026	700.064
sp|P52594-4|AGFG1_HUMAN	sp	P52594-4	HUMAN	AGFG1	Isoform 4 of Arf-GAP domain and FG repeat-containing protein 1	15	13	1	0	11	14	14	10	992.068	1051.88	996.567	990.057	987.69	904.339	1015.56	962.708	988.537	911.407	927.936	1070.55	1074.15	1094.43	999.243	1163.86	800.451	810.006	776.78	759.032	771.815	789.448	800.083	749.559	754.809	805.502	723.014	804.812	768.528	808.151	791.746	770.423	1863.22	1992.79	2301.59	1900.17
sp|O95081|AGFG2_HUMAN	sp	O95081	HUMAN	AGFG2	Arf-GAP domain and FG repeat-containing protein 2	3	2	1	0	7	4	5	7	133.677	121.815	119.614	124.478	125.217	124.535	128.977	124.674	119.129	110.366	105.754	117.909	119.05	121.764	124.717	136.172	64.5236	66.8778	55.8879	66.6105	69.6666	68.2703	64.3379	56.8785	55.1234	64.2537	59.6554	78.5573	70.1302	65.3931	67.5665	52.9192	772.318	780.913	783.104	729.732
sp|Q8N302|AGGF1_HUMAN	sp	Q8N302	HUMAN	AGGF1	Angiogenic factor with G patch and FHA domains 1	0	1	0	1	2	3	4	4	0	0	0	0	0	0	0	0	0	0	0	0	0	0	0	0	78.5026	78.7516	64.1065	64.6757	78.2238	73.7276	66.3446	72.1385	58.2146	76.833	70.2516	70.3127	74.4681	65.5533	61.8168	54.5755	286.709	299.316	312.543	291.393
sp|Q53H12|AGK_HUMAN	sp	Q53H12	HUMAN	AGK	Acylglycerol kinase, mitochondrial	15	15	1	0	12	14	13	16	1839.12	1845.45	1783.56	1817.65	1709.84	1820.33	1851.31	1846.5	1737.08	1741.52	1844.45	1822.44	1851.15	2010.22	1824.06	2072.76	984.651	974.603	996.48	998.83	945.183	969.723	975.969	1009.38	947.344	1021.1	1069.13	902.162	961.122	989.251	959.534	1029.61	2363.37	2109.27	2088.78	2127.9
sp|P35573|GDE_HUMAN	sp	P35573	HUMAN	AGL	Glycogen debranching enzyme	13	22	1	0	24	27	17	20	947.643	851.276	903.526	871.791	874.591	933.453	881.983	869.323	868.539	901.437	938.815	891.154	936.168	942.424	949.334	1006.13	1403.52	1171.88	1313.83	1266.08	1255.66	1360.44	1233.62	1291.38	1299.06	1307.9	1385.25	1304.92	1300.64	1355.92	1425.23	1531.02	4272.83	4209.87	4248.98	4201.91
sp|Q9UL18|AGO1_HUMAN	sp	Q9UL18	HUMAN	AGO1	Protein argonaute-1	8	3	1	0	4	6	3	1	774.188	823.15	811.194	778.3	727.2	751.428	744.781	745.036	707.246	768.472	667.227	872.801	816.05	797.608	810.935	783.719	312.988	266.474	280.1	292.255	280.631	267.945	279.721	261.633	272.389	253.898	257.22	290.597	301.571	288.282	300.673	268.622	699.969	781.427	773.945	684.323
sp|Q9UKV8|AGO2_HUMAN	sp	Q9UKV8	HUMAN	AGO2	Protein argonaute-2	13	7	1	0	9	16	15	14	1136.79	1187.43	1144.07	1129.22	1138.67	1116.69	1223.49	1144.36	1091.07	1078.11	1036.7	1203.18	1205.01	1242.68	1267.95	1204.06	567.841	552.028	550.022	581.501	542.996	555.094	582.083	556.015	568.521	538.225	548.299	569.987	598.643	586.326	579.029	605.089	1939.05	1863.39	1799.57	1748.56
sp|Q9H9G7|AGO3_HUMAN	sp	Q9H9G7	HUMAN	AGO3	Protein argonaute-3	0	4	0	1	5	3	5	10	0	0	0	0	0	0	0	0	0	0	0	0	0	0	0	0	206.329	192.773	192.52	213.005	191.736	209.245	210.216	198.772	203.737	204.895	197.529	218.354	210.657	198.144	218.89	216.208	444.762	441.589	499.314	489.795
sp|Q9HCK5|AGO4_HUMAN	sp	Q9HCK5	HUMAN	AGO4	Protein argonaute-4	6	7	1	0	6	6	5	6	575.671	577.385	552.625	541.59	561.403	553.141	594.011	536.578	505.253	539.637	508.255	577.849	576.119	596.626	601.499	612.815	876.308	806.402	829.457	812.91	800.362	781.907	831.749	820.018	817.307	801.286	791.991	845.894	841.431	845.281	834.856	836.499	775.562	717.131	774.248	691.405
sp|Q99943|PLCA_HUMAN	sp	Q99943	HUMAN	AGPAT1	1-acyl-sn-glycerol-3-phosphate acyltransferase alpha	2	0	0	1	4	6	7	2	120.841	101.797	107.13	116.383	98.2238	105.719	93.7388	110.32	103.584	99.5809	104.483	82.9335	118.019	120.405	103.378	119.873	0	0	0	0	0	0	0	0	0	0	0	0	0	0	0	0	476.201	497.44	457.407	484.857
sp|O15120|PLCB_HUMAN	sp	O15120	HUMAN	AGPAT2	1-acyl-sn-glycerol-3-phosphate acyltransferase beta	0	1	0	1	4	3	2	3	0	0	0	0	0	0	0	0	0	0	0	0	0	0	0	0	33.0368	31.0958	29.9575	33.7968	26.1553	28.3625	36.2402	27.9393	33.0049	30.7792	35.0355	31.2336	32.6861	29.5144	29.0843	32.2876	1374.9	1107.81	1027.38	998.822
sp|Q9NRZ7-3|PLCC_HUMAN	sp	Q9NRZ7-3	HUMAN	AGPAT3	Isoform 3 of 1-acyl-sn-glycerol-3-phosphate acyltransferase gamma	7	2	1	0	7	4	5	7	1128.8	1068.37	1188.87	1129.94	1060.49	1111.28	1093.83	1130.95	1093.91	1044.73	1075.97	797.485	1083.39	1127.2	1113.95	1108.93	477.364	500.45	484.476	483.195	483.666	468.068	484.282	509.068	497.267	520.79	491.392	493.376	514.736	507.956	511.432	503.823	1572.83	1606.56	1554.11	1629.96
sp|Q9NUQ2|PLCE_HUMAN	sp	Q9NUQ2	HUMAN	AGPAT5	1-acyl-sn-glycerol-3-phosphate acyltransferase epsilon	1	0	0	1	4	8	10	4	20.743	14.1631	16.4089	18.3871	15.0489	14.3654	22.9751	13.094	15.1316	16.975	14.2867	12.1054	16.9342	21.9214	21.4865	20.4344	0	0	0	0	0	0	0	0	0	0	0	0	0	0	0	0	364.697	341.015	362.704	320.466
sp|O00116|ADAS_HUMAN	sp	O00116	HUMAN	AGPS	Alkyldihydroxyacetonephosphate synthase, peroxisomal	29	26	1	0	36	26	24	24	2164.26	2031.49	2013.86	2024.81	1988.82	2157.9	2114.39	2048.16	2036.88	2058.69	2141.69	2074.16	2095.75	2159.79	2270.02	2235.25	1513.11	1346.32	1643.87	1634.07	1613.93	1756.74	1574.33	1682.98	1697.75	1737.58	1970.07	1555.54	1469.45	1590.16	1489.3	1550.64	5384.4	5630.7	5497.43	5277.51
sp|O00468|AGRIN_HUMAN	sp	O00468	HUMAN	AGRN	Agrin	1	0	0	1	20	17	14	17	49.0551	35.9164	39.6056	31.7847	36.4222	31.7978	48.4214	39.5326	38.9239	25.7427	37.0067	43.6417	32.9933	32.9094	28.8128	33.0443	0	0	0	0	0	0	0	0	0	0	0	0	0	0	0	0	2249.07	2226.62	1979.9	2159.81
sp|Q9UPW5-3|CBPC1_HUMAN	sp	Q9UPW5-3	HUMAN	AGTPBP1	Isoform 3 of Cytosolic carboxypeptidase 1	2	3	1	0	2	5	3	3	69.7088	86.9491	78.1186	69.1476	70.6343	67.9726	81.7682	77.4356	71.8495	67.0694	66.4841	85.8356	81.3798	77.1204	61.7679	64.7735	198.462	189.395	178.565	173.456	189.625	205.672	194.137	190.015	164.481	193.183	197.631	200.988	193.813	200.194	184.504	162.646	324.212	238.098	308.615	288.671
sp|Q8WYP5-2|ELYS_HUMAN	sp	Q8WYP5-2	HUMAN	AHCTF1	Isoform 2 of Protein ELYS	25	13	1	0	49	50	43	50	1831.89	1889.69	1933.38	1803.11	1855.69	1795.95	1934.96	1831.2	1877.35	1835.31	1762.82	1902.99	1872.74	1888.66	2093.78	1983.7	647.873	728.577	659.057	678.807	657.714	656.135	709.325	685.534	648.881	680.421	685.002	695.481	718.625	656.555	648.622	695.211	6628.81	6827.23	6944.57	6740.77
sp|P23526|SAHH_HUMAN	sp	P23526	HUMAN	AHCY	Adenosylhomocysteinase	65	59	1	0	44	43	43	51	8111.64	8282	8010.35	7949.09	7860.17	7542.16	8162.48	7972.88	7881.58	7605.33	7628.34	8324	8201.89	8536.45	8633.42	8774.35	6070.46	5853.89	5875.27	5879.14	5844.41	5646.26	5875.25	5831.31	5710.18	5624.99	5512.57	6017.28	6128.63	5990.07	6046.82	5845.31	9246.16	8754.07	9429.92	8657.62
sp|O43865|SAHH2_HUMAN	sp	O43865	HUMAN	AHCYL1	Adenosylhomocysteinase 2	15	9	1	0	16	14	14	9	1308.25	1262.54	1261.07	1235.02	1200.1	1270.73	1274.26	1264.17	1247.64	1308.16	1376.23	1329.98	1350.45	1196.13	1083.13	1063.4	1123.68	1035.35	1021	1007.64	1003.91	1090.61	1079.95	1032.19	1032.72	1030.85	1114.07	1151.59	1082.17	1095.85	1081.74	1004.68	3128.1	3125.28	3380.82	3125.94
sp|Q96HN2|SAHH3_HUMAN	sp	Q96HN2	HUMAN	AHCYL2	Adenosylhomocysteinase 3	6	9	1	0	20	17	16	8	1574.82	1477.22	1426.15	1391.97	1395.78	1486.07	1438.99	1415.43	1398.24	1439.47	1503.74	1475.54	1495.72	1377.53	1246.08	1280.9	1401.75	1359.29	1235.78	1295.27	1230.69	1416.73	1273.35	1309.66	1309.97	1271.9	1421.29	1273.39	1326.7	1320.19	1332.73	1280.12	3431.97	3309.21	3112.79	3808.06
sp|Q5TGY3|AHDC1_HUMAN	sp	Q5TGY3	HUMAN	AHDC1	AT-hook DNA-binding motif-containing protein 1	1	2	1	0	15	11	6	9	80.8247	85.9979	72.0384	58.9537	55.4682	46.0748	86.4854	64.8394	66.3831	50.789	42.573	97.8402	95.1922	70.7865	62.9293	59.262	292.591	223.679	264.025	246.968	251.241	222.923	258.417	244.08	243.486	229.18	231.687	296.205	272.67	277.329	278.834	252.392	1702.15	1715.64	1732.75	1600.54
sp|Q8N157|AHI1_HUMAN	sp	Q8N157	HUMAN	AHI1	Jouberin	1	0	0	1	1	1	0	1	36.5034	36.145	34.1678	41.4934	79.1535	74.4074	26.4098	34.0803	39.5244	39.587	65.6642	43.7208	46.9017	45.8892	49.5426	54.6405	0	0	0	0	0	0	0	0	0	0	0	0	0	0	0	0	133.773	122.239	107.847	139.794
sp|Q09666|AHNK_HUMAN	sp	Q09666	HUMAN	AHNAK	Neuroblast differentiation-associated protein AHNAK	1104	984	1	0	1101	828	758	794	159552	158157	160798	154062	141707	143116	160372	164512	158396	148379	152253	162223	164405	165131	160419	159170	127466	140278	128548	125407	118504	108202	127152	128133	125454	121822	109673	132550	131020	130313	126175	114114	272295	270408	269259	291417
sp|Q8IVF2|AHNK2_HUMAN	sp	Q8IVF2	HUMAN	AHNAK2	Protein AHNAK2	24	57	1	0	29	12	18	12	1452.19	1285.58	1286.2	1236.24	1139.49	1416.82	1420.5	1351.94	1272.42	1369.4	1364.62	1260.04	1334.39	1303.82	1305.51	1555.49	4821.6	4809.05	4565.46	4397.93	4222.93	4329.16	4490.78	4440.93	4383.61	4298.69	4046.37	4761.87	4853.89	4553.76	4494.36	3948.59	3687.93	3672.43	3778.95	3725.23
sp|P35869|AHR_HUMAN	sp	P35869	HUMAN	AHR	Aryl hydrocarbon receptor	0	1	0	1	3	3	1	0	0	0	0	0	0	0	0	0	0	0	0	0	0	0	0	0	38.5232	22.136	17.471	13.6373	6.1002	8.37047	20.6314	21.9556	16.2674	10.6729	11.9856	33.6148	34.8396	32.9385	20.6856	17.7708	553.84	527.718	590.242	524.918
sp|O95433|AHSA1_HUMAN	sp	O95433	HUMAN	AHSA1	Activator of 90 kDa heat shock protein ATPase homolog 1	29	32	1	0	26	25	29	23	1749.74	1564.64	1653.08	1674.24	1786.71	1544.46	1663.71	1604.76	1756.71	1706.03	1656.33	1592.03	1678.46	1746.93	1805.99	1693.98	2293.8	2105.64	2148.79	2164.33	2192.23	2120.33	2188.26	2176.65	2163.65	2145.22	2026.75	2231.93	2186.2	2258.04	2291.91	2278.59	4261.92	3897.08	4142.34	3996.27
sp|Q96BJ3|AIDA_HUMAN	sp	Q96BJ3	HUMAN	AIDA	Axin interactor, dorsalization-associated protein	19	14	1	0	13	10	11	12	1708.57	1741.85	1722.9	1647.18	1651.45	1506.87	1736.37	1693.05	1655.42	1647.12	1526.82	1878.96	1782.15	1767.08	1797.4	1824.51	879.25	686.599	821.053	820.87	834.587	819.053	853.208	855.083	795.664	823.963	725.144	858.023	860.648	835.569	977.936	945.232	2067.51	1936.5	2095.2	1817.38
sp|O95831|AIFM1_HUMAN	sp	O95831	HUMAN	AIFM1	Apoptosis-inducing factor 1, mitochondrial	38	17	1	0	25	21	18	26	3114.01	3134.35	3134.68	3169.97	3206.96	3428.68	3140.89	3146.66	3182.65	3172.66	3315.25	3115.9	3172.2	3382.93	3287.43	3500.89	1482.32	1599.78	1633.23	1644.16	1692.52	1687.5	1550.78	1702.46	1640.22	1593.95	1711.19	1529.2	1608.07	1585.87	1464.22	1512.68	5629.67	5313.35	5115.5	4960.24
sp|Q9BRQ8|AIFM2_HUMAN	sp	Q9BRQ8	HUMAN	AIFM2	Apoptosis-inducing factor 2	4	3	1	0	2	3	1	5	303.902	265.753	260.322	253.148	254.403	296.857	249.972	243.103	268.095	280.873	276.834	233.718	262.366	279.325	283.809	374.418	124.445	138.193	144.23	119.529	113.665	130.582	147.421	119.628	115.802	138.336	140.101	127.927	134.148	128.972	132.129	125.063	166.098	139.039	148.313	167.204
sp|Q9Y4K1|AIM1_HUMAN	sp	Q9Y4K1	HUMAN	AIM1	Absent in melanoma 1 protein	61	51	1	0	23	36	34	25	5978.13	5952.19	5929.23	5621.34	5395.43	5510.97	5980.91	5729.18	5665.11	5588.7	5585.23	6019.67	5980.58	6002.88	5931.67	5800.76	3989.96	3793.91	3808.58	3707.79	3692.43	3395.41	3904.86	3761.74	3752.88	3636.88	3383.81	3972.43	3997.74	3863.94	3991.11	3583.47	4054.99	4322.69	4176.09	4139.56
sp|Q12904-2|AIMP1_HUMAN	sp	Q12904-2	HUMAN	AIMP1	Isoform 2 of Aminoacyl tRNA synthase complex-interacting multifunctional protein 1	43	29	1	0	32	28	21	33	4276.68	4326.98	4308.2	4287.43	4343.78	4215.11	4341.77	4358.31	4318.07	4360.62	4327.91	4460.8	4496.57	4726.49	4569.53	4668.95	2801.25	2883.07	2706.62	2754.61	2799.22	3025.34	2756.46	2782.12	2780.73	2815.95	2975.7	2773.63	2829.76	2817.52	2764.53	2672.33	6815.35	6939.58	7037.63	6793.29
sp|Q13155|AIMP2_HUMAN	sp	Q13155	HUMAN	AIMP2	Aminoacyl tRNA synthase complex-interacting multifunctional protein 2	25	19	1	0	22	19	19	18	2747.52	2650.43	2711.55	2632.92	2498.19	2693.25	2604.34	2610.77	2429.47	2645.08	2584.63	2761.79	2742.57	3097.99	2773.84	3026.35	2496.1	2041.28	2400.95	2387.94	2288.29	2461.75	2297.93	2368.83	2380.02	2374.62	2562.64	2442.87	2259.79	2446.14	2481.85	2266.37	3379.66	3184.86	3281.88	3032.75
sp|O00170|AIP_HUMAN	sp	O00170	HUMAN	AIP	AH receptor-interacting protein	34	18	1	0	11	21	20	17	3518.13	3194.75	3192.96	3108.41	3129.24	3018.31	3354.74	3172.62	3186.91	3130.21	3001.54	3405.8	3505.4	3343.56	3461.7	3333.06	1737.26	1578.06	1595.62	1517.21	1509.52	1464.33	1578.06	1572.52	1519.74	1470.33	1337.88	1638.11	1697.11	1664.13	1643.7	1604.06	1683.71	1999	1674.65	1740.39
sp|Q96IF1|AJUBA_HUMAN	sp	Q96IF1	HUMAN	AJUBA	LIM domain-containing protein ajuba	1	1	1	0	4	4	7	7	127.83	77.9846	77.4083	65.2602	62.3255	72.8697	89.2043	66.6336	59.8138	56.6238	75.2044	95.9708	73.2293	65.1851	54.7736	63.4254	83.8028	49.0313	76.4195	73.1912	57.9501	65.007	75.2123	55.159	69.1107	74.2527	69.6642	82.5185	81.9709	57.4469	43.903	44.9625	950.599	804.761	1089.85	942.887
sp|P00568|KAD1_HUMAN	sp	P00568	HUMAN	AK1	Adenylate kinase isoenzyme 1	38	20	1	0	17	19	16	17	3465.16	2935.65	2950.28	3054.9	3173.47	3269.17	3013.62	3039.98	3123.41	3159.24	3345.24	3084.85	3260.76	3509.06	3586.32	3710.36	1623.32	1410.17	1437.38	1489.03	1520.43	1602.55	1462.11	1466.96	1533.39	1493.74	1491.79	1517.24	1545.71	1602.01	1579.84	1532.76	2369.53	2610.89	2566.38	2629.42
sp|P54819|KAD2_HUMAN	sp	P54819	HUMAN	AK2	Adenylate kinase 2, mitochondrial	23	25	1	0	20	20	18	25	3070.92	3100.18	3049.8	3066.74	3171.65	3391.82	3028.07	3042.07	3017.11	3103.07	3205.61	3059.54	3104.85	3167.23	3177.92	3341.27	2187.58	1984.83	2118.14	2221.68	2235.97	2428.51	2154.86	2142.57	2170.22	2274.65	2447.26	2120.4	2203.01	2194.72	2203.74	2183.37	5359.44	4824.07	4965.85	4975.21
sp|Q9UIJ7|KAD3_HUMAN	sp	Q9UIJ7	HUMAN	AK3	GTP:AMP phosphotransferase AK3, mitochondrial	12	10	1	0	12	12	10	11	585.713	570.343	555.102	553.974	534.977	619.72	589.211	561.141	575.051	584.399	599.191	591.778	599.487	594.029	601.442	590.484	1123.88	1040.82	1022.17	1056.46	1108.68	1263.5	1000.09	1038.27	1072.15	1105.19	1267.9	988.244	1046.04	1054.72	1117.25	1067.15	3538.71	3015.66	3069.9	3046.64
sp|P27144|KAD4_HUMAN	sp	P27144	HUMAN	AK4	Adenylate kinase 4, mitochondrial	2	5	1	0	6	11	11	12	310.114	300.873	309.109	314.133	290.811	389.676	301.343	289.898	310.928	302.481	393.815	313.449	300.582	310.433	347.229	441.638	337.05	325.283	320.901	318.467	318.563	367.835	317.245	301.706	328.204	335.833	372.904	330.406	324.782	319.696	327.127	325.007	1288.82	1545.49	1389.78	1493.81
sp|Q9Y6K8|KAD5_HUMAN	sp	Q9Y6K8	HUMAN	AK5	Adenylate kinase isoenzyme 5	9	11	1	0	6	5	7	6	812.866	817.552	739.162	739.192	706.525	606.153	797.886	769.161	733.394	669.911	612.944	836.042	842.81	763.576	709.344	621.068	1187.42	1109.44	1070.31	987.741	962.049	865.148	1090.65	1040.58	1014.2	911.602	773.332	1168.86	1168.28	1127.84	1140.34	917.319	1397.15	1225.92	1204.57	1302.21
sp|Q9Y3D8|KAD6_HUMAN	sp	Q9Y3D8	HUMAN	AK6	Adenylate kinase isoenzyme 6	8	6	1	0	6	4	1	2	1737.76	1689.46	1660.36	1683.11	1609.87	1687.3	1693.33	1658.94	1668.04	1724.26	1778.37	1749.77	1672.89	1619.78	1777.08	1740.76	726.906	714.961	804.953	745.374	790.379	732.72	843.643	763.695	747.295	789.311	843.118	825.465	770.348	742.269	709.374	639.374	803.622	720.725	788.333	748.395
sp|O43572|AKA10_HUMAN	sp	O43572	HUMAN	AKAP10	A-kinase anchor protein 10, mitochondrial	4	1	1	0	11	5	7	6	197.941	205.735	184.549	185.763	186.695	171.745	209.438	187.097	193.428	199.922	187.808	188.237	200.999	198.552	182.703	209.729	289.05	314.368	272.906	290.16	279.394	255.803	279.051	275.401	279.719	274.223	258.68	292.56	276.844	294.033	275.145	275.67	1725.23	1884.39	1810.86	1763.04
sp|Q9UKA4|AKA11_HUMAN	sp	Q9UKA4	HUMAN	AKAP11	A-kinase anchor protein 11	11	11	1	0	21	17	15	10	1126.67	1192.12	1078.75	958.423	862.805	776.295	1196.77	1083.98	958.965	860.48	719.555	1230.17	1105.19	973.76	850.764	756.835	2091.98	2163.75	1963.77	1860.88	1691.29	1567.07	2106.61	1931.27	1796.19	1637.55	1427.61	2118.72	2245	2032.91	1959.77	1631.83	3288	3085.34	2895.98	3212.22
sp|Q02952|AKA12_HUMAN	sp	Q02952	HUMAN	AKAP12	A-kinase anchor protein 12	3	4	1	0	79	37	35	26	86.1184	88.8552	80.1077	95.1458	83.3511	74.7544	85.7049	83.9462	82.5842	80.8637	83.7464	87.057	97.0969	88.3936	82.425	109.008	588.368	544.404	460.698	453.055	361.808	373.161	478.453	467.064	447.914	392.579	435.24	491.208	528.455	502.297	573.039	541.97	15468.3	14563.4	16648.5	15531.6
sp|Q12802-2|AKP13_HUMAN	sp	Q12802-2	HUMAN	AKAP13	Isoform 2 of A-kinase anchor protein 13	32	26	1	0	47	52	55	45	3908.35	4183.5	3914.1	3853.99	3692.49	3608.72	4172.02	3937.68	3856.46	3712.54	3631.73	4112.59	4052.29	4003.16	3903.73	3895.67	2956.37	2816.95	2818.35	2748.07	2589.21	2703.26	2894.78	2785.64	2790.72	2734.36	2774.47	2910.99	2982.52	2925.52	3026.49	3146.77	6621.16	6817.62	6402.23	6284.71
sp|Q12802-4|AKP13_HUMAN	sp	Q12802-4	HUMAN	AKAP13	Isoform 3 of A-kinase anchor protein 13	0	1	0	1	1	0	0	0	0	0	0	0	0	0	0	0	0	0	0	0	0	0	0	0	10.3554	16.5409	22.722	23.6121	25.3004	27.9974	21.0092	14.936	25.5224	28.5835	30.8893	12.941	10.9546	10.0764	13.6434	18.4741	36.2306	48.9978	35.609	50.9829
sp|Q02040|AK17A_HUMAN	sp	Q02040	HUMAN	AKAP17A	A-kinase anchor protein 17A	1	2	1	0	8	7	8	8	26.1325	27.1505	26.8623	26.5884	21.4942	26.883	30.0333	22.0587	14.9886	23.7261	31.6278	23.7277	30.3537	27.5193	24.1495	30.9096	118.995	106.549	107.198	108.626	108.252	104.152	107.699	107.601	102.364	120.232	138.176	107.158	130.053	128.057	122.199	127.052	870.513	934.454	1037.33	913.307
sp|Q9Y2D5-6|AKAP2_HUMAN	sp	Q9Y2D5-6	HUMAN	AKAP2	Isoform 4 of A-kinase anchor protein 2	52	34	1	0	80	59	59	62	4021.2	4157.38	4133.58	4012	4036.39	3746.25	4211.52	4023.49	4196.11	4148.69	3955.36	4308.6	4270.75	4244.21	4530.01	4353.42	2314.22	2326.51	2261.25	2271.54	2247.45	2266.29	2268.81	2245.85	2380.1	2391.19	2174.28	2252.06	2392.69	2340.04	2472.96	2531.05	11037.7	11638.2	10991	10741.1
sp|O43823|AKAP8_HUMAN	sp	O43823	HUMAN	AKAP8	A-kinase anchor protein 8	8	10	1	0	15	18	13	14	445.474	482.975	467.111	450.017	489.571	418.024	472.016	467.832	445.529	441.414	446.699	510.552	500.788	499.936	482.867	501.147	599.028	535.776	587.479	550.873	627.202	618.646	603.657	552.774	609.405	645.776	684.364	614.157	593.989	579.985	633.631	647.784	1768.31	1930.33	1856.69	1860.2
sp|Q9ULX6|AKP8L_HUMAN	sp	Q9ULX6	HUMAN	AKAP8L	A-kinase anchor protein 8-like	14	9	1	0	12	12	13	20	1144.48	1105.62	1068.28	1021.89	1033.77	996.358	1118.75	1036.97	1092.75	1114.5	1232.23	1189.04	1170.64	1170.3	1281.96	1512.72	850.153	858.63	807.147	796.894	767.023	719.016	838.024	804.83	808.441	864.72	927.866	879.921	916.589	859.377	915.598	1036.34	2047.3	1839.8	1954.23	1914.68
sp|Q99996-6|AKAP9_HUMAN	sp	Q99996-6	HUMAN	AKAP9	Isoform 6 of A-kinase anchor protein 9	16	16	1	0	46	58	47	67	908.766	880.683	881.158	826.202	784.287	769.298	908.772	875.913	829.539	816.231	772.806	968.63	896.1	920.005	852.402	857.779	1461.73	1434.02	1321.16	1320.4	1249.15	1314.55	1437.26	1337.46	1263.64	1399.31	1257.17	1416.3	1408.76	1456.13	1480.89	1234.26	5725.72	5952.92	6000.4	5743.34
sp|P14550|AK1A1_HUMAN	sp	P14550	HUMAN	AKR1A1	Alcohol dehydrogenase [NADP(+)]	63	51	1	0	33	29	24	32	7610.46	7217.53	7362.54	7214.52	7091.16	6731.87	7376.64	7261.8	7134.83	7010.77	7099.11	7634.03	7667.98	7856.84	8048.32	8233.95	5673.52	4737.06	5204.15	5020.55	5096.74	5310.23	5017.36	4808.94	5010.84	4846.72	4781.7	5498.15	5168.12	5347.74	5660.69	5900.63	6127.19	6042.33	6477.72	6395.01
sp|P15121|ALDR_HUMAN	sp	P15121	HUMAN	AKR1B1	Aldose reductase	48	42	1	0	21	54	30	38	6544.78	6616.84	6356.74	6536.97	6218.7	5826.85	6523.55	6396.68	6305.12	6182.17	5994.25	6660.92	6881.27	7301.74	7343.82	7829.82	3515.58	3272.84	3298	3361.95	3328.04	3528.15	3255.71	3400.31	3288.73	3077.4	3009.77	3500.59	3577.7	3520.04	3451.86	3793.86	3894.09	3839.7	3967.71	3738.98
sp|P52895|AK1C2_HUMAN	sp	P52895	HUMAN	AKR1C2	Aldo-keto reductase family 1 member C2	9	11	1	0	8	9	2	10	709.225	722.768	702.004	723.041	709.016	652.771	706.127	681.576	712.779	720.366	720.607	768.649	722.114	798.749	802.289	1416.45	1060.8	915.801	954.97	1038.58	1022.15	1162.48	1009.44	983.728	999.115	980.928	1082.87	1021.76	1125.69	1091.26	1058.68	1296.28	835.894	884.029	874.181	886.72
sp|P42330|AK1C3_HUMAN	sp	P42330	HUMAN	AKR1C3	Aldo-keto reductase family 1 member C3	5	1	1	0	2	0	2	0	446.439	420.425	410.795	450.107	431.468	410.544	425.358	398.882	432.2	429.817	454.179	458.277	431.595	489.813	461.888	850.796	222.462	223.815	213.328	214.068	229.248	196.348	209.463	213.696	208.724	197.529	216.43	245.283	228.23	236.63	231.238	230.767	110.065	141.063	158.344	113.557
sp|O43488|ARK72_HUMAN	sp	O43488	HUMAN	AKR7A2	Aflatoxin B1 aldehyde reductase member 2	20	20	1	0	14	15	11	15	1806.97	1674.67	1694.63	1738.53	1627.22	1672.15	1653.3	1690.18	1713.89	1629.71	1694.03	1789.95	1798.85	1862.93	1836.86	1936.87	1178.24	1105.92	1075.06	1131.85	1071.39	1126.59	1127.43	1100.39	1117.2	1049.43	1057.24	1160.67	1145.67	1121.77	1154.9	1166.71	1664.9	1852.86	1935.53	1842.77
sp|P31749|AKT1_HUMAN	sp	P31749	HUMAN	AKT1	RAC-alpha serine/threonine-protein kinase	11	5	1	0	12	14	12	12	753.037	765.774	734.964	742.863	742.125	684.956	785.288	761.352	731.764	708.62	666.854	794.636	785.082	778.684	739.843	717.276	356.937	305.982	328.916	357.471	310.664	296.313	345.89	366.18	313.05	334.133	305.23	352.63	346.65	357.303	352.609	322.906	1948.98	2051.57	1965.85	1903.42
sp|Q96B36-3|AKTS1_HUMAN	sp	Q96B36-3	HUMAN	AKT1S1	Isoform 3 of Proline-rich AKT1 substrate 1	5	6	1	0	4	4	3	5	556.25	414.494	435.423	459.798	486.589	483.045	435.405	424.187	535.398	545.77	512.151	504.346	450.912	530.471	500.784	530.58	250.356	161.303	207.889	219.323	200.468	253.27	187.235	183.917	248.125	206.83	243.534	227.323	241.99	245.956	248.32	242.438	1335.94	1037.15	1039.69	922.354
sp|P31751|AKT2_HUMAN	sp	P31751	HUMAN	AKT2	RAC-beta serine/threonine-protein kinase	10	14	1	0	15	10	11	9	770.523	681.943	664.583	695.07	710.526	673.452	672.931	680.229	715.322	703.146	680.37	683.939	674.598	725.312	721.911	671.675	1203.16	1220.78	1157.46	1111.01	1140.35	1090.4	1130.44	1159.8	1112.11	1139.1	1008.03	1232.57	1197.59	1200.05	1183.99	1111.39	2046.22	1970.27	2007.18	1936.56
sp|Q9Y243|AKT3_HUMAN	sp	Q9Y243	HUMAN	AKT3	RAC-gamma serine/threonine-protein kinase	4	6	1	0	8	3	8	6	681.027	623.036	655.174	634.656	625.942	585.373	634.713	618.712	624.009	648.232	625.08	660.936	677.051	672.352	636.737	644.863	371.477	365.299	397.192	433.897	425.287	443.966	381.857	375.643	389.757	422.503	405.157	373.09	378.907	357.66	379.91	349.41	1198.57	1130.61	1257.14	1180.32
sp|P13716-2|HEM2_HUMAN	sp	P13716-2	HUMAN	ALAD	Isoform 2 of Delta-aminolevulinic acid dehydratase	13	8	1	0	15	7	8	5	1971.09	1907.85	1933.1	2066.48	2055.9	2132.19	1889.52	1917.14	1858.01	1857.22	1847.27	2075.41	1996.35	2002.52	1995.03	2086.74	485.983	405.758	433.588	446.615	445.373	478.299	432.756	440.17	440.231	428.414	442.201	453.489	460.006	434.652	480.231	466.215	2071.24	2045.37	2099.44	1970.55
sp|P13196|HEM1_HUMAN	sp	P13196	HUMAN	ALAS1	5-aminolevulinate synthase, nonspecific, mitochondrial	1	0	0	1	1	4	3	1	32.9619	24.9587	18.7996	15.5861	10.7167	10.4579	18.5102	19.837	23.7477	29.3339	35.6514	21.0855	24.6081	22.7899	26.0461	36.6167	0	0	0	0	0	0	0	0	0	0	0	0	0	0	0	0	237.699	106.677	169.513	177.502
sp|Q13740|CD166_HUMAN	sp	Q13740	HUMAN	ALCAM	CD166 antigen	47	46	1	0	36	52	46	34	5347.61	5066.97	5366.24	5247.44	4759.89	5685.82	4832.4	5614.26	5331.55	4999.97	5911.71	4105.41	4651.69	5370.26	4954.31	5457.01	3255.14	5234.73	4506.36	4138.52	3641.52	3049.07	4127.41	3957.06	3914.69	3978.96	3811.93	3951.03	3855.05	3900.73	3492.14	4227.38	5599.01	5597.94	5933.06	6285.09
sp|Q8IZ83|A16A1_HUMAN	sp	Q8IZ83	HUMAN	ALDH16A1	Aldehyde dehydrogenase family 16 member A1	15	11	1	0	19	15	15	20	1244.62	1221.39	1286.46	1312.78	1387.38	1362.93	1273.02	1285.45	1330.05	1342.52	1268.08	1273.46	1273.8	1231.83	1280.22	1292.2	692.308	707.297	712.779	661.869	726.672	649.006	713.334	706.894	662.281	712.241	661.14	745.466	708.437	716.764	720.436	681.71	2772.32	2788.03	2714.87	2713.78
sp|P54886|P5CS_HUMAN	sp	P54886	HUMAN	ALDH18A1	Delta-1-pyrroline-5-carboxylate synthase	57	52	1	0	56	51	50	47	5696.16	5705.46	5757.8	5545.72	5374.29	5631.78	5696.35	5721.34	5671.31	5627.7	5682.95	5685.92	5932.95	6093.18	6132.92	6071.01	4216.9	4129.64	3970.7	3815.49	3617.16	3966.22	3877.32	3781.97	3696.45	3886.59	4272.58	4062	4080.3	4225.23	4135.49	4328.02	8382.3	8106.29	7165.86	7561.77
sp|O94788|AL1A2_HUMAN	sp	O94788	HUMAN	ALDH1A2	Retinal dehydrogenase 2	0	1	0	1	0	2	2	1	0	0	0	0	0	0	0	0	0	0	0	0	0	0	0	0	234.354	192.038	207.029	213.907	216.337	230.939	205.43	211.365	214.035	235.394	216.915	192.235	210.095	239.42	254.315	217.243	0	0	0	0
sp|P30837|AL1B1_HUMAN	sp	P30837	HUMAN	ALDH1B1	Aldehyde dehydrogenase X, mitochondrial	10	6	1	0	17	11	11	13	1397.14	1363.9	1382.2	1348.86	1297.63	1322.99	1406.32	1425.04	1369.43	1324.43	1326.34	1409	1440.26	1502.31	1434.5	1406.48	824.633	780.706	743.4	763.117	733.203	842.22	770.514	724.358	759.5	756.202	821.647	796.161	777.998	806.89	751.844	744.495	2910.53	3031.43	3132.57	3054.33
sp|Q3SY69|AL1L2_HUMAN	sp	Q3SY69	HUMAN	ALDH1L2	Mitochondrial 10-formyltetrahydrofolate dehydrogenase	38	46	1	0	64	58	53	49	5389.15	4770.46	4879.65	4605.94	4236.51	4998.65	4809.65	5024.8	4775.26	4657.13	4989.51	4718.92	5128.13	5284.01	5155.97	5419.16	4225.98	4371.06	3930.97	3632.77	3258.18	4044.99	3713.53	3548.46	3499.77	3724.53	4118.96	3876.81	4023.48	4148.91	4161.46	4233.65	9815.58	8908.78	8798.86	9144.25
sp|P05091|ALDH2_HUMAN	sp	P05091	HUMAN	ALDH2	Aldehyde dehydrogenase, mitochondrial	17	20	1	0	39	19	13	18	1439.49	1392.96	1401.99	1365.26	1205.36	1387.43	1377.11	1399.61	1326.59	1349.36	1315.43	1412.74	1478.14	1522.61	1391.27	1402.22	1872.39	1632.75	1612.04	1612.44	1503.31	1724.55	1573.99	1505.78	1450.84	1528.92	1799.34	1666.83	1795.09	1764.76	1805.35	1995.51	5492.49	5370.97	5150.02	5265.09
sp|P51648-2|AL3A2_HUMAN	sp	P51648-2	HUMAN	ALDH3A2	Isoform 2 of Fatty aldehyde dehydrogenase	4	10	1	0	11	12	9	10	511.914	437.155	444.246	423.581	426.116	493.753	429.036	414.814	417.982	456.947	469.282	465.325	448.494	469.974	444.088	515.179	939.569	805.088	851.106	829.833	786.222	775.341	852.976	827.075	798.354	844.638	861.495	887.084	844.442	874.954	930.893	832.061	1379.3	1371.65	1548.21	1363
sp|P30038|AL4A1_HUMAN	sp	P30038	HUMAN	ALDH4A1	Delta-1-pyrroline-5-carboxylate dehydrogenase, mitochondrial	11	15	1	0	27	22	21	18	997.298	925.794	997.853	977.358	927.695	997.624	952.121	1020.02	951.109	951.742	994.135	972.534	1009.57	1022.42	1060.82	1005.49	1167.2	874.348	1111.53	1037.32	1053.88	1205.71	1078.63	983.69	1062.62	1034.75	1163.93	1191.55	1097.74	1064.87	1119.07	1131.62	4688.74	4891.93	5283.17	5029.49
sp|Q02252|MMSA_HUMAN	sp	Q02252	HUMAN	ALDH6A1	Methylmalonate-semialdehyde dehydrogenase [acylating], mitochondrial	12	11	1	0	10	8	9	7	587.87	535.936	546.364	566.386	509.818	571.567	543.182	539.329	546.411	549.887	595.105	557.215	576.921	575.958	572.205	603.563	776.289	667.885	694.347	686.145	624.161	794.07	637.518	630.88	643.774	693.604	750.724	692.753	737.64	698.888	734.202	812.944	1415.07	1421.5	1398.75	1304.02
sp|P49419-2|AL7A1_HUMAN	sp	P49419-2	HUMAN	ALDH7A1	Isoform 2 of Alpha-aminoadipic semialdehyde dehydrogenase	43	55	1	0	36	32	28	28	4276.92	3925.66	3943.26	4001.46	3861.26	4317.22	3938.92	4150.2	3979.31	3920.92	4125.28	4034.82	4186	4422.23	4364.73	4558.27	6088.69	5579.67	5495.32	5489.96	5492.31	5905.76	5377.97	5434.65	5527.12	5673.08	5930.88	5778.95	5652.55	5743.68	5914.91	5763.45	6611.87	6619.61	6556.23	6542.6
sp|P49189|AL9A1_HUMAN	sp	P49189	HUMAN	ALDH9A1	4-trimethylaminobutyraldehyde dehydrogenase	36	39	1	0	43	22	23	28	4947.37	4631.51	4760.62	4669.4	4554.93	4819.34	4692.78	4737.97	4802.85	4709.77	5044	4836.81	4985.06	5208.59	5131.74	5307.78	4050.64	3841.98	3605.74	3615.58	3711.02	4193.91	3684.92	3620.07	3609.7	3618.96	4011.42	3758.55	3843.59	3932.67	3858.35	3815.77	8095.18	8484.75	8117.09	7968.49
sp|P04075-2|ALDOA_HUMAN	sp	P04075-2	HUMAN	ALDOA	Isoform 2 of Fructose-bisphosphate aldolase A	152	123	1	0	198	179	149	203	17602.3	16629.8	16500.4	16519.3	15587	15836.2	16690.2	16749.8	16626.6	15744.6	16223.1	17338.8	17809.2	17869.1	17449.3	18832	10747.4	10451	9987.86	10105.8	10026.4	10051.6	10281.7	10392.2	10181.6	9430.76	9093.44	10473.2	10615.3	10523.7	10342.6	10381.4	25727.2	27926.1	26023.7	30710.1
sp|P04075|ALDOA_HUMAN	sp	P04075	HUMAN	ALDOA	Fructose-bisphosphate aldolase A	0	1	0	1	1	1	1	0	0	0	0	0	0	0	0	0	0	0	0	0	0	0	0	0	19.1137	21.3814	20.4586	24.6324	20.5441	15.3794	24.0713	26.5835	18.8017	21.7186	16.8291	25.9582	21.4044	19.4613	21.6537	16.8403	55.5696	50.297	61.4659	79.2493
sp|P09972|ALDOC_HUMAN	sp	P09972	HUMAN	ALDOC	Fructose-bisphosphate aldolase C	16	15	1	0	15	14	13	26	1008.75	919.2	983.726	944.349	904.11	982.943	922.831	936.936	960.105	903.519	957.51	1021.82	979.017	1012.22	986.606	1157.45	1080.58	980.387	1007.65	973.93	910.948	991.671	960.512	971.211	943.909	934.485	892.423	1050.28	1001.78	1033.47	1099.94	1022.32	1369.96	1357.45	1455.06	1387.17
sp|Q9BT22|ALG1_HUMAN	sp	Q9BT22	HUMAN	ALG1	Chitobiosyldiphosphodolichol beta-mannosyltransferase	6	4	1	0	5	11	7	6	394.154	367.708	392.343	366.127	335.995	340.889	360.985	377.045	408.269	368.256	337.404	301.888	371.279	393.357	397.56	361.674	427.98	444.134	470.585	451.228	421.471	399.505	449.828	472.281	456.244	443.198	415.262	457.464	478.175	467.157	434.535	462.573	1315.54	1167.53	1209.16	1184.48
sp|Q2TAA5|ALG11_HUMAN	sp	Q2TAA5	HUMAN	ALG11	GDP-Man:Man(3)GlcNAc(2)-PP-Dol alpha-1,2-mannosyltransferase	5	5	1	0	9	6	6	4	748.276	725.327	749.39	761.396	666.029	738.533	689.113	773.213	755.565	713.695	758.95	538.135	698.073	748.048	708.83	753.798	951.355	1139	1016.01	997.014	917.041	931.35	1055.41	1081.9	1029.24	1039.05	1130.98	992.749	1061.15	1005.7	926.34	1113.23	2044.15	2059.39	2016.78	1926.2
sp|Q9BV10|ALG12_HUMAN	sp	Q9BV10	HUMAN	ALG12	Dol-P-Man:Man(7)GlcNAc(2)-PP-Dol alpha-1,6-mannosyltransferase	2	0	0	1	1	1	0	2	126.685	120.05	136.419	134.558	126.765	135.168	117.805	133.681	135.953	135.498	154.593	83.5467	114.887	141.497	125.676	131.263	0	0	0	0	0	0	0	0	0	0	0	0	0	0	0	0	81.7698	58.9194	78.8953	85.2925
sp|Q9NP73|ALG13_HUMAN	sp	Q9NP73	HUMAN	ALG13	Putative bifunctional UDP-N-acetylglucosamine transferase and deubiquitinase ALG13	3	0	0	1	0	3	2	3	247.363	273.292	259.466	237.095	259.292	247.698	252.616	239.434	251.515	275.355	277.499	274.379	264.922	258.57	250.358	259.622	0	0	0	0	0	0	0	0	0	0	0	0	0	0	0	0	0	0	0	0
sp|Q9H553|ALG2_HUMAN	sp	Q9H553	HUMAN	ALG2	Alpha-1,3/1,6-mannosyltransferase ALG2	5	6	1	0	8	11	4	11	225.333	243.193	249.125	235.629	249.592	247.036	247.637	244.235	242.836	232.4	256.042	244.674	251.746	254.869	258.649	237.004	404.202	390.062	416.49	400.824	381.72	389.06	383.625	391.527	398.299	445.379	445.415	395.053	403.246	405.204	413.727	455.94	1489.64	1465.65	1828.22	1541.94
sp|Q92685|ALG3_HUMAN	sp	Q92685	HUMAN	ALG3	Dol-P-Man:Man(5)GlcNAc(2)-PP-Dol alpha-1,3-mannosyltransferase	1	0	0	1	1	0	0	0	335.921	266.637	254.042	190.018	146.754	132.444	254.071	246.496	118.669	61.0656	97.8424	209.196	275.601	239.034	171.182	135.799	0	0	0	0	0	0	0	0	0	0	0	0	0	0	0	0	135.752	241.53	201.686	206.177
sp|Q9Y673|ALG5_HUMAN	sp	Q9Y673	HUMAN	ALG5	Dolichyl-phosphate beta-glucosyltransferase	12	6	1	0	13	6	8	5	1121.81	1159.93	1146.74	1154.8	1127.85	1153.51	1135.01	1192.6	1165.97	1095.24	1174.74	909.151	1148.31	1220.19	1163	1169.11	386.761	374.669	376.814	389.94	362.685	381.278	406.666	379.08	354.502	394.262	411.431	370.68	391.683	387.926	355.067	394.191	2531.14	2386.77	2486.56	2325.23
sp|Q9BVK2|ALG8_HUMAN	sp	Q9BVK2	HUMAN	ALG8	Probable dolichyl pyrophosphate Glc1Man9GlcNAc2 alpha-1,3-glucosyltransferase	4	3	1	0	0	1	1	1	223.661	191.929	199.839	216.636	201.238	192.419	220.28	215.985	192.569	190.813	165.586	161.443	200.937	200.336	185.195	189.352	152.366	183.872	151.418	147.91	124.904	126.942	179.675	162.151	164.141	131.794	124.254	177.385	169.584	159.667	135.676	162.648	0	0	0	0
sp|Q9H6U8-3|ALG9_HUMAN	sp	Q9H6U8-3	HUMAN	ALG9	Isoform 3 of Alpha-1,2-mannosyltransferase ALG9	4	1	1	0	3	4	3	5	202.507	186.938	204.232	201.532	187.005	203.099	198.397	181.023	189.166	182.535	183.093	145.987	194.589	209.147	196.057	210.986	122.29	154.463	150.879	145.397	116.452	99.7695	134.62	135.631	143.619	136.81	113.153	127.417	137.796	134.083	127.672	121.241	519.029	532.977	509.1	477.193
sp|Q9NXW9|ALKB4_HUMAN	sp	Q9NXW9	HUMAN	ALKBH4	Alpha-ketoglutarate-dependent dioxygenase alkB homolog 4	1	1	1	0	3	2	4	0	25.5698	21.3262	23.6174	22.3971	22.5528	20.4928	27.5288	28.4756	21.3917	29.6988	23.9063	24.8474	31.7316	24.6968	23.8899	24.9953	18.6655	20.9691	17.1831	18.0137	18.1873	20.9436	17.8995	16.2678	19.1312	19.5695	16.3874	17.8842	22.432	18.7809	18.4814	16.1708	159.152	147.398	171.597	148.774
sp|Q6P6C2|ALKB5_HUMAN	sp	Q6P6C2	HUMAN	ALKBH5	RNA demethylase ALKBH5	10	7	1	0	12	6	2	12	610.16	593.534	602.052	573.055	505.055	487.153	590.798	560.621	525.065	461.425	461.744	628.418	627.436	577.908	530.127	584.116	434.547	415.983	404.278	392.387	336.847	272.123	445.213	387.789	358.15	335.601	272.171	446.605	414.81	408.926	420.965	381.204	1225.33	1255.72	1341.36	1246.88
sp|Q3KRA9-2|ALKB6_HUMAN	sp	Q3KRA9-2	HUMAN	ALKBH6	Isoform 2 of Alpha-ketoglutarate-dependent dioxygenase alkB homolog 6	1	0	0	1	1	2	0	2	18.4208	17.2767	15.5522	15.535	14.6733	19.4279	19.5213	14.6579	16.1563	16.5789	12.2754	11.5347	12.7201	14.2483	14.227	15.1127	0	0	0	0	0	0	0	0	0	0	0	0	0	0	0	0	51.0481	29.9317	48.5318	50.9517
sp|Q96BT7-4|ALKB8_HUMAN	sp	Q96BT7-4	HUMAN	ALKBH8	Isoform 4 of Alkylated DNA repair protein alkB homolog 8	0	1	0	1	10	3	4	4	0	0	0	0	0	0	0	0	0	0	0	0	0	0	0	0	111.446	92.172	90.9816	89.0705	89.4051	77.601	92.2012	80.7144	83.4947	76.024	77.4527	86.245	84.6205	94.082	90.1001	72.5201	1703.18	1656.99	2166.21	1972.02
sp|Q86TB3|ALPK2_HUMAN	sp	Q86TB3	HUMAN	ALPK2	Alpha-protein kinase 2	4	1	1	0	9	13	3	13	272.607	237.62	200.753	164.107	146.247	133.282	241.263	213.643	166.384	148.672	130.582	274.339	243.974	205.019	165.015	174.392	39.1337	36.3647	24.3943	20.5895	15.6318	9.57731	26.5647	25.8374	16.699	15.3383	12.1536	43.6526	39.9979	27.0598	28.3702	16.6179	1126.08	1030.74	1145.55	1181.94
sp|Q96Q42|ALS2_HUMAN	sp	Q96Q42	HUMAN	ALS2	Alsin	1	0	0	1	8	10	7	11	438.614	388.766	372.305	370.763	369.287	390.007	401.867	367.463	360.626	358.371	355.911	413.153	412.642	422.8	427.031	423.811	0	0	0	0	0	0	0	0	0	0	0	0	0	0	0	0	1231.99	1264.96	1324.67	1181.44
sp|Q86V81|THOC4_HUMAN	sp	Q86V81	HUMAN	ALYREF	THO complex subunit 4	19	14	1	0	32	18	24	20	2051.63	1996.47	2023.91	2043.64	1994.6	1986.49	2007.61	1999.55	2059.28	1978.91	1984.91	2162.01	2147.67	2094.19	2153.14	2192.23	1372.78	1341.82	1383.19	1411	1443.51	1306.05	1358.63	1416.89	1345.33	1373.01	1220.07	1416.45	1368.11	1398.48	1380.94	1352.3	5882.54	5727.96	5970.16	5681.72
sp|Q9C0C7-5|AMRA1_HUMAN	sp	Q9C0C7-5	HUMAN	AMBRA1	Isoform 5 of Activating molecule in BECN1-regulated autophagy protein 1	0	1	0	1	1	1	1	2	0	0	0	0	0	0	0	0	0	0	0	0	0	0	0	0	223.46	249.988	189.357	189.95	186.063	190.93	213.679	221.357	193.329	176.517	198.27	219.745	245.868	218.049	294.401	233.158	84.244	83.8788	81.5268	78.8254
sp|P17707|DCAM_HUMAN	sp	P17707	HUMAN	AMD1	S-adenosylmethionine decarboxylase proenzyme	0	1	0	1	4	3	3	1	0	0	0	0	0	0	0	0	0	0	0	0	0	0	0	0	108.054	107.842	71.0963	51.9563	37.7471	21.4705	101.892	81.4367	53.9099	31.4248	37.7759	147.221	180.355	122.081	66.7282	78.2378	1130.47	1300.35	826.103	1290.86
sp|Q9Y303-3|NAGA_HUMAN	sp	Q9Y303-3	HUMAN	AMDHD2	Isoform 3 of N-acetylglucosamine-6-phosphate deacetylase	0	3	0	1	1	1	1	2	0	0	0	0	0	0	0	0	0	0	0	0	0	0	0	0	60.5211	50.2277	52.4113	58.1081	49.9531	62.6998	60.2995	63.3373	58.1269	51.0761	46.697	50.5843	49.8429	48.7169	51.5378	55.2104	140.352	94.6452	78.8995	139.826
sp|Q9UKV5|AMFR_HUMAN	sp	Q9UKV5	HUMAN	AMFR	E3 ubiquitin-protein ligase AMFR	0	3	0	1	4	10	9	7	0	0	0	0	0	0	0	0	0	0	0	0	0	0	0	0	81.8904	72.5329	56.7052	49.3432	39.6967	41.4858	66.7061	64.7633	54.1828	41.0577	34.5441	90.5035	85.367	87.6099	77.5942	59.9249	272.348	240.433	253.312	249.583
sp|Q4VCS5|AMOT_HUMAN	sp	Q4VCS5	HUMAN	AMOT	Angiomotin	2	1	1	0	2	2	1	2	193.249	151.989	152.013	138.073	144.999	124.94	152.224	129.053	134.947	126.562	127.978	176.676	161.616	138.153	128.69	141.203	33.1929	34.8292	37.5921	34.8645	31.6397	34.3856	42.2433	37.7213	39.3163	45.2563	36.7584	38.148	42.0919	27.7775	41.3038	39.0663	172.316	231.94	260.766	221.179
sp|Q8IY63|AMOL1_HUMAN	sp	Q8IY63	HUMAN	AMOTL1	Angiomotin-like protein 1	1	1	1	0	3	4	3	5	33.2394	26.9175	26.8398	27.0673	23.4667	18.0322	24.6889	20.1699	21.079	23.3024	23.037	33.58	30.3833	17.7074	24.9443	24.916	33.8811	25.5969	25.9333	24.4085	28.5376	25.3379	25.4407	19.0956	22.4548	23.4009	29.2119	41.2128	37.7125	33.5891	35.4301	28.6439	500.45	524.084	457.682	470.286
sp|Q9Y2J4-4|AMOL2_HUMAN	sp	Q9Y2J4-4	HUMAN	AMOTL2	Isoform 4 of Angiomotin-like protein 2	6	2	1	0	6	10	9	12	364.369	294.889	270.118	194.891	154.817	147.573	282.475	306.152	311.538	346.797	304.493	504.111	364.399	323.17	472.021	584.731	82.8183	84.8667	63.0848	50.5226	42.6521	40.7319	74.9384	64.9662	75.0696	80.5194	78.5236	117.75	94.7192	108.495	131.223	133.746	977.383	802.155	756.984	899.378
sp|Q01433|AMPD2_HUMAN	sp	Q01433	HUMAN	AMPD2	AMP deaminase 2	21	24	1	0	23	24	21	24	2068.95	2011.42	2004.93	2027.94	1985.43	1954.5	1930.46	1926.48	1946.44	2014.23	1986.19	2033.09	2016.21	2073.05	2086.99	2208	2416.84	1962.03	2149.16	2104.02	1998.49	1702.99	2054.64	2133.32	2062.56	1995.17	2034.91	2263	2272.67	2253.98	2251.09	2378.62	4463.01	4371.29	4459.86	4345.51
sp|Q86W34|AMZ2_HUMAN	sp	Q86W34	HUMAN	AMZ2	Archaemetzincin-2	0	1	0	1	1	0	2	0	0	0	0	0	0	0	0	0	0	0	0	0	0	0	0	0	19.4165	12.0495	16.5502	16.7189	10.6912	10.1482	18.3531	18.8748	16.0098	17.0899	13.1486	18.3794	22.417	20.2334	14.4134	10.6193	295.852	239.754	311.876	283.005
sp|Q9H1A4|APC1_HUMAN	sp	Q9H1A4	HUMAN	ANAPC1	Anaphase-promoting complex subunit 1	3	3	1	0	11	10	10	17	191.723	196.463	204.18	190.482	196.328	205.658	191.279	191.759	191.552	195.696	195.006	210.081	205.429	200.575	205.891	189.839	223.195	211.578	235.923	235.931	209.507	200.838	238.456	231.343	221.634	213.436	223.921	241.462	236.381	219.363	204.938	207.192	1553.52	1540.7	1629.42	1563.45
sp|Q9UM13|APC10_HUMAN	sp	Q9UM13	HUMAN	ANAPC10	Anaphase-promoting complex subunit 10	1	0	0	1	5	4	4	3	169.531	168.399	180.146	177.629	171.002	176.639	185.837	166.607	191.626	200.948	206.632	176.309	174.907	182.877	173.35	145.672	0	0	0	0	0	0	0	0	0	0	0	0	0	0	0	0	769.321	676.383	884.47	717.869
sp|Q9BS18|APC13_HUMAN	sp	Q9BS18	HUMAN	ANAPC13	Anaphase-promoting complex subunit 13	1	0	0	1	3	3	1	3	72.0747	52.8504	48.3407	51.7187	52.8375	62.1593	63.4897	58.3625	54.7351	62.8401	65.1231	59.129	61.9874	61.9103	72.3198	66.4849	0	0	0	0	0	0	0	0	0	0	0	0	0	0	0	0	231.035	212.334	222.844	212.614
sp|Q9UJX6|ANC2_HUMAN	sp	Q9UJX6	HUMAN	ANAPC2	Anaphase-promoting complex subunit 2	3	4	1	0	1	2	2	2	166.284	177.446	168.573	156.537	174.313	155.442	167.16	169.319	163.55	172.976	149.078	192.218	182.302	149.267	138.137	143.467	265.769	217.301	258.29	238.718	229.258	211.719	253.45	254.159	243.34	241.169	212.021	284.548	263.468	253.817	279.166	230.429	154.821	154.54	206.243	137.534
sp|Q9UJX5-3|APC4_HUMAN	sp	Q9UJX5-3	HUMAN	ANAPC4	Isoform 3 of Anaphase-promoting complex subunit 4	6	5	1	0	3	4	6	2	478.416	462.106	467.818	452.509	440.458	484.954	484.748	470.144	481.886	491.641	510.88	485.893	483.186	477.623	456.877	450.746	421.569	457.221	430.926	431.011	461.85	438.787	407.655	447.711	429.647	483.663	490.445	416.172	458.473	443.068	471.636	422.563	423.839	420.729	410.671	380.392
sp|Q9UJX4|APC5_HUMAN	sp	Q9UJX4	HUMAN	ANAPC5	Anaphase-promoting complex subunit 5	3	4	1	0	5	4	2	7	224.236	220.194	225.355	219.65	215.591	217.903	211.461	197.294	197.317	219.531	198.946	247.428	229.112	224.557	207.796	188.163	480.01	479.535	452.354	477.588	429.679	360.404	478.436	472.655	460.812	481.059	438.895	493.93	488.925	441.729	452.807	434.417	758.321	779.788	821.052	680.714
sp|Q9UJX3|APC7_HUMAN	sp	Q9UJX3	HUMAN	ANAPC7	Anaphase-promoting complex subunit 7	11	9	1	0	8	10	13	18	1023.91	1115.66	1163.96	1119.35	1065.96	1065.14	1126.95	1179.04	1143.1	1128.71	1106.27	1130.01	1059.66	1001.77	979.854	905.444	715.799	698.249	715.092	696.805	694.88	654.478	732.802	718.187	674.019	693.071	673.383	751.057	726.732	701.095	684.961	645.547	1401.83	1503.68	1410.29	1393.5
sp|Q5VTE6|ANGE2_HUMAN	sp	Q5VTE6	HUMAN	ANGEL2	Protein angel homolog 2	1	0	0	1	2	2	4	3	26.3602	24.8203	27.8325	25.8978	19.1214	19.3227	26.4631	30.929	19.7748	21.3821	22.9706	21.3888	24.0915	22.1521	22.4704	27.2916	0	0	0	0	0	0	0	0	0	0	0	0	0	0	0	0	163.877	144.218	141.94	128.694
sp|Q9UKU9|ANGL2_HUMAN	sp	Q9UKU9	HUMAN	ANGPTL2	Angiopoietin-related protein 2	2	6	1	0	3	2	4	0	82.4719	47.8296	40.4191	36.0914	22.1021	24.4177	48.0231	34.8368	42.1561	24.9055	46.3787	82.0821	79.3851	90.3147	152.547	398.506	225.764	163.174	126.581	94.1147	98.2959	91.9846	156.726	134.338	91.7793	83.8404	105.789	300.443	303.064	251.879	350.476	708.045	494.845	557.364	728.496	524.983
sp|P16157-14|ANK1_HUMAN	sp	P16157-14	HUMAN	ANK1	Isoform Er13 of Ankyrin-1	3	0	0	1	26	7	6	11	385.774	400.065	409.892	392.702	362.84	423.859	415.374	394.744	382.949	395.48	370.747	402.654	405.027	421.584	431.255	429.768	0	0	0	0	0	0	0	0	0	0	0	0	0	0	0	0	5093.12	5132.44	4694.68	4768.02
sp|Q01484|ANK2_HUMAN	sp	Q01484	HUMAN	ANK2	Ankyrin-2	4	2	1	0	3	2	1	4	530.846	405.419	470.538	436.901	380.428	482.365	413.078	479.303	425.43	424.544	472.558	352.707	458.53	483.471	441.986	489.575	311.279	474.461	328.303	310.257	276.248	256.903	301.205	291.338	273.401	285.29	340.27	267.946	350.445	329.517	290.497	326.928	589.307	486.87	471.554	496.416
sp|Q9P2R3-4|ANFY1_HUMAN	sp	Q9P2R3-4	HUMAN	ANKFY1	Isoform 4 of Rabankyrin-5	19	19	1	0	26	24	20	20	1635.31	1509.7	1526.35	1484.7	1523.46	1564.85	1555.48	1467.5	1454.31	1546.02	1448.38	1567.68	1566.28	1536.45	1624.15	1538.02	1802.51	1732.82	1716.33	1681.18	1665.4	1659.8	1812.04	1714.4	1680.86	1607.35	1583.67	1839.53	1790.67	1840.74	1934.34	1981.08	6580.85	6388.76	6112.54	6227.48
sp|Q8IWZ3-6|ANKH1_HUMAN	sp	Q8IWZ3-6	HUMAN	ANKHD1	Isoform 6 of Ankyrin repeat and KH domain-containing protein 1	13	13	1	0	35	35	23	23	527.968	520.905	510.054	456.313	375.993	355.707	513.414	481.992	497.408	552.784	511.876	536.367	526.782	472.954	490.239	494.693	735.353	699.689	598.754	527.878	449.249	386.909	684.396	655.318	610.807	628.462	686.822	707.871	753.838	706.065	717.926	660.634	4567.81	4889.28	4349.06	4566.63
sp|Q86XL3|ANKL2_HUMAN	sp	Q86XL3	HUMAN	ANKLE2	Ankyrin repeat and LEM domain-containing protein 2	14	12	1	0	33	31	28	24	759.111	808.09	774.99	726.901	701.074	635.887	767.535	769.235	756.829	764.508	720.35	796.41	788.402	766.339	702.819	671.768	1081.52	1162.31	1038	1017.8	935.936	907.263	1039.99	1032.79	1027.23	1024.71	947.795	1056.12	1085.29	1047.51	1046.1	926.283	5024.71	5013.64	4512.86	4989.12
sp|Q8IV38|ANKY2_HUMAN	sp	Q8IV38	HUMAN	ANKMY2	Ankyrin repeat and MYND domain-containing protein 2	5	6	1	0	13	12	10	9	718.613	594.428	544.154	548.216	492.091	503.693	631.504	573.117	590.646	569.86	563.985	642.124	670.542	572.085	516.791	498.118	427.192	385.913	368.991	344.401	331.575	327.189	428.823	372.142	375.47	313.54	275.68	437.519	431.911	421.075	411.141	322.855	2349.08	1945.97	2165.37	2185.22
sp|Q6UB99|ANR11_HUMAN	sp	Q6UB99	HUMAN	ANKRD11	Ankyrin repeat domain-containing protein 11	2	2	1	0	16	8	4	17	96.5315	93.9796	92.4522	71.084	62.7677	55.9623	95.8949	98.937	73.4058	50.7237	53.7811	121.252	83.6664	70.9261	56.1801	41.4089	58.5252	58.1158	57.9116	42.9469	50.4524	37.0302	65.0808	53.8567	46.8283	37.4915	26.9654	68.1838	75.5643	57.9006	48.1509	38.0623	1983.8	1752.92	1987.23	1983.72
sp|Q6UB98|ANR12_HUMAN	sp	Q6UB98	HUMAN	ANKRD12	Ankyrin repeat domain-containing protein 12	2	3	1	0	2	1	2	3	77.9727	81.6777	76.1804	74.2621	57.3361	52.2454	80.9889	72.7063	72.8578	72.0061	81.3838	85.0129	87.8249	68.1935	54.6693	74.7491	89.5605	91.3672	100.992	93.4988	87.746	65.7239	108.377	97.7562	84.8553	90.9609	93.5703	107.046	102.977	90.1011	77.8321	102.468	379.278	407.341	320.051	400.155
sp|Q8IZ07|AN13A_HUMAN	sp	Q8IZ07	HUMAN	ANKRD13A	Ankyrin repeat domain-containing protein 13A	5	5	1	0	11	13	9	8	371.975	360.74	346.326	351.862	326.92	308.93	356.781	347.635	323.829	338.019	293.365	402.46	370.256	352.179	359.397	353.231	331.051	385.831	325.284	329.389	311.774	276.063	366.68	333.832	319.337	286.399	254.67	364.861	354.935	333.393	327.572	250.552	1495.54	1582.07	1601.94	1549.79
sp|Q8N6S4|AN13C_HUMAN	sp	Q8N6S4	HUMAN	ANKRD13C	Ankyrin repeat domain-containing protein 13C	1	0	0	1	2	0	0	0	33.8879	30.9274	33.5965	30.6661	21.4135	24.7644	28.4887	30.9001	32.0394	34.3851	29.7216	31.1131	27.4129	24.5429	23.2407	21.6305	0	0	0	0	0	0	0	0	0	0	0	0	0	0	0	0	220.064	246.349	226.692	222.759
sp|Q6ZTN6-3|AN13D_HUMAN	sp	Q6ZTN6-3	HUMAN	ANKRD13D	Isoform 3 of Ankyrin repeat domain-containing protein 13D	2	2	1	0	3	0	2	1	221.334	232.982	232.919	211.544	199.06	181.104	218.681	200.048	210.157	222.336	198.662	242.829	217.364	228.545	222.193	204.423	187.139	158.436	176.779	173.905	187.632	131.653	185.691	172.393	169.295	156.017	136.024	187.061	175.015	177.502	163.973	142.137	441.595	329.983	416.909	396.91
sp|Q6P6B7|ANR16_HUMAN	sp	Q6P6B7	HUMAN	ANKRD16	Ankyrin repeat domain-containing protein 16	1	0	0	1	1	1	0	0	31.4909	31.999	29.2448	30.8567	35.7363	24.6679	27.3808	23.4514	25.7707	26.1874	25.0609	35.331	25.9443	26.6616	29.0792	28.3311	0	0	0	0	0	0	0	0	0	0	0	0	0	0	0	0	97.0242	93.4997	91.6285	114.183
sp|O75179|ANR17_HUMAN	sp	O75179	HUMAN	ANKRD17	Ankyrin repeat domain-containing protein 17	10	7	1	0	20	23	16	19	443.698	450.149	474.337	446.907	414.215	371.409	491.396	465.29	435.745	436.432	367.149	489.963	466.296	404.97	387.844	383.104	388.4	392.804	360.659	354.468	328.498	319.498	387.746	394.077	348.983	347.571	334.775	386.319	403.349	390.267	392.699	351.642	3258.14	3389.57	3164.06	3045.38
sp|Q9UPS8-3|ANR26_HUMAN	sp	Q9UPS8-3	HUMAN	ANKRD26	Isoform 3 of Ankyrin repeat domain-containing protein 26	0	1	0	1	6	8	8	8	0	0	0	0	0	0	0	0	0	0	0	0	0	0	0	0	72.9025	72.9497	64.1539	61.5148	60.1663	47.4564	65.9505	69.5494	56.0303	60.4512	50.2995	73.957	81.1616	65.9887	61.7709	56.6078	1327.43	1291.74	1164.86	1213.22
sp|Q96NW4|ANR27_HUMAN	sp	Q96NW4	HUMAN	ANKRD27	Ankyrin repeat domain-containing protein 27	7	2	1	0	5	7	6	4	556.007	547.393	507.637	487.381	480.921	521.259	524.73	492.084	488.508	703.672	439.101	544.661	526.404	513.885	633.614	465.907	64.8445	59.0773	56.2398	56.5441	63.3895	55.7241	65.9265	55.3346	58.555	66.1107	66.1264	70.5797	66.1966	66.8159	71.1049	50.0282	785.519	826.791	828.043	837.05
sp|O15084-1|ANR28_HUMAN	sp	O15084-1	HUMAN	ANKRD28	Isoform 3 of Serine/threonine-protein phosphatase 6 regulatory ankyrin repeat subunit A	3	2	1	0	8	14	11	13	123.458	126.411	122.195	120.094	121.947	115.366	141.685	122.494	126.956	125.645	130.729	124.677	126.545	132.054	126.894	125.518	256.52	261.781	258.329	249.329	245.083	242.955	246.973	236.908	227.047	237.111	263.166	255.936	251.891	260.454	260.628	232.049	902.335	1007.32	963.631	1030.91
sp|Q8N283|ANR35_HUMAN	sp	Q8N283	HUMAN	ANKRD35	Ankyrin repeat domain-containing protein 35	2	0	0	1	1	0	0	0	49.813	45.6192	37.3364	36.6298	38.6096	49.5258	40.0873	45.5916	43.6596	37.5062	35.9503	44.4226	38.6868	42.8359	34.1264	32.9563	0	0	0	0	0	0	0	0	0	0	0	0	0	0	0	0	77.1297	81.016	79.1865	77.2278
sp|Q8N8A2|ANR44_HUMAN	sp	Q8N8A2	HUMAN	ANKRD44	Serine/threonine-protein phosphatase 6 regulatory ankyrin repeat subunit B	5	5	1	0	12	13	6	12	675.171	662.765	638.109	605.335	598.989	621.302	643.616	605.771	635.924	628.88	657.807	656.504	660.449	648.235	649.417	653.255	340.935	304.497	282.39	299.299	292.489	317.865	316.514	346.54	319.981	303.411	336.769	329.346	310.719	327.985	333.438	321.539	2082.26	2098.73	2070.17	2089.97
sp|Q8WVL7|ANR49_HUMAN	sp	Q8WVL7	HUMAN	ANKRD49	Ankyrin repeat domain-containing protein 49	1	1	1	0	1	2	0	1	39.7485	47.4977	41.5954	37.3054	34.9777	34.0887	41.7349	41.8832	35.5678	44.206	43.0565	44.752	39.8549	37.3395	43.6351	35.6964	122.921	104.026	97.185	106.047	122.394	123.951	111.773	101.568	113.094	126.445	118.025	107.888	120.461	111.429	114.408	118.409	145.54	193.009	165.5	168.58
sp|Q9ULJ7|ANR50_HUMAN	sp	Q9ULJ7	HUMAN	ANKRD50	Ankyrin repeat domain-containing protein 50	2	0	0	1	7	6	7	11	117.316	158.992	167.49	128.436	120.889	102.643	248.356	143.086	124.195	191.667	145.266	153.694	133.321	128.746	151.684	137.987	0	0	0	0	0	0	0	0	0	0	0	0	0	0	0	0	668.01	732.645	665.435	662.681
sp|Q8NB46|ANR52_HUMAN	sp	Q8NB46	HUMAN	ANKRD52	Serine/threonine-protein phosphatase 6 regulatory ankyrin repeat subunit C	0	3	0	1	4	9	7	2	0	0	0	0	0	0	0	0	0	0	0	0	0	0	0	0	216.622	194.403	208.285	174.564	148.452	121.705	228.661	208.765	171.15	149.547	118.743	235.178	260.387	229.001	207.984	175.667	292.549	317.725	277.086	299.927
sp|Q6NXT1|ANR54_HUMAN	sp	Q6NXT1	HUMAN	ANKRD54	Ankyrin repeat domain-containing protein 54	3	3	1	0	5	3	5	6	65.9322	77.1538	74.2669	72.8865	71.4573	67.4405	72.813	73.6446	66.7892	62.6465	59.5905	65.4409	70.9108	66.7011	76.295	68.7248	56.1044	56.3539	63.6043	54.4585	58.4949	65.4465	56.679	57.9864	50.2447	54.6142	60.6485	57.2066	64.2338	66.251	65.4194	61.8797	701.222	742.947	738.818	610.952
sp|Q92625|ANS1A_HUMAN	sp	Q92625	HUMAN	ANKS1A	Ankyrin repeat and SAM domain-containing protein 1A	3	2	1	0	8	8	4	4	64.8419	66.8219	65.7611	66.8401	68.4231	65.3939	71.4214	63.0602	63.1972	75.757	63.3599	60.1254	65.792	61.716	78.5082	76.7835	48.4665	42.139	45.0839	41.587	38.3618	44.4154	46.2792	44.2193	40.863	43.3578	47.738	45.6933	54.4718	47.8317	42.8062	61.1207	900.481	932.058	986.908	891.183
sp|Q6ZW76|ANKS3_HUMAN	sp	Q6ZW76	HUMAN	ANKS3	Ankyrin repeat and SAM domain-containing protein 3	2	1	1	0	1	2	5	3	63.3874	77.8956	88.1826	94.2024	116.727	111.572	69.6523	97.674	99.9794	105.171	110.318	69.058	74.8269	81.5214	63.2508	67.4024	128.763	129.716	125.985	132.073	121.58	153.253	134.604	139.646	130.06	143.584	138.985	138.727	140.21	131.936	123.936	128.014	197.867	226.013	222.329	193.386
sp|Q68DC2-4|ANKS6_HUMAN	sp	Q68DC2-4	HUMAN	ANKS6	Isoform 3 of Ankyrin repeat and SAM domain-containing protein 6	0	1	0	1	3	0	0	3	0	0	0	0	0	0	0	0	0	0	0	0	0	0	0	0	75.1345	51.7715	64.9717	53.0509	58.873	64.6532	64.1307	55.0292	67.849	52.5251	61.4625	71.0752	72.9863	72.383	76.8617	66.5963	314.196	278.07	337.002	301.9
sp|Q9H8Y5|ANKZ1_HUMAN	sp	Q9H8Y5	HUMAN	ANKZF1	Ankyrin repeat and zinc finger domain-containing protein 1	7	6	1	0	8	14	11	9	355.715	341.166	328.609	312.573	297.275	328.542	350.464	323.78	323.958	333.167	356.421	340.03	354.965	312.454	307.214	310.754	196.145	178.026	181.625	179.811	170.856	169.46	178.287	169.627	193.754	170.349	168.774	192.282	194.589	182.167	190.654	155.707	1385.19	1277.49	1250.23	1231.4
sp|Q9NQW6|ANLN_HUMAN	sp	Q9NQW6	HUMAN	ANLN	Anillin	62	32	1	0	43	55	50	48	5036.39	6593.96	6434	6261.11	6754.05	5091	6671.65	6465.2	6559.05	6765.5	5537.61	6293.27	5540.95	4745.9	4473.71	3362.61	1653.87	2398.47	2162.11	2490.86	2195.28	1618.68	2421.02	2308.5	2236.38	1994.89	1388.63	2125.14	2093.47	1614.58	1556.31	2193.45	5514.8	6808.79	4304.35	5958.65
sp|Q9NQW6-2|ANLN_HUMAN	sp	Q9NQW6-2	HUMAN	ANLN	Isoform 2 of Anillin	3	0	0	1	0	1	2	0	81.3478	140.719	134.953	135.447	126.992	92.1416	157.272	130.095	131.928	131.019	104.524	109.027	106.506	92.4606	89.9813	69.0573	0	0	0	0	0	0	0	0	0	0	0	0	0	0	0	0	0	0	0	0
sp|Q9NW15|ANO10_HUMAN	sp	Q9NW15	HUMAN	ANO10	Anoctamin-10	24	16	1	0	28	22	14	22	1870.5	1895.55	1899.81	1917.64	1861.39	1918.31	1848.04	1955.48	1873.4	1842.51	1802.87	1486.42	1813.85	1970.68	1901.43	1900.06	993.469	916.848	952.587	1019.77	978.248	996.529	977.976	980.312	964.999	992.418	979.476	1003.18	1009.41	984.825	940.545	1015.65	5674.15	5324.9	6008.78	5385.82
sp|Q9BYT9|ANO3_HUMAN	sp	Q9BYT9	HUMAN	ANO3	Anoctamin-3	1	0	0	1	1	0	0	1	49.6254	41.6359	35.2624	40.7027	44.4034	40.4045	47.3012	38.7594	40.6404	46.851	43.4572	42.362	48.217	44.0103	45.4314	58.4915	0	0	0	0	0	0	0	0	0	0	0	0	0	0	0	0	195.572	158.935	158.746	221.396
sp|Q4KMQ2-2|ANO6_HUMAN	sp	Q4KMQ2-2	HUMAN	ANO6	Isoform 2 of Anoctamin-6	9	9	1	0	21	12	11	13	826.048	738.31	843.247	804.458	764.82	875.17	715.345	891.448	775.337	838.77	856.098	546.299	727.215	854.584	778.742	751.053	366.571	515.627	461.22	453.651	381.002	360.067	421.693	416.505	452.306	430.454	437.166	426.469	427.126	445.583	391.312	464.342	4321.95	3695.91	3858.49	3813.37
sp|P39687|AN32A_HUMAN	sp	P39687	HUMAN	ANP32A	Acidic leucine-rich nuclear phosphoprotein 32 family member A	19	20	1	0	10	14	12	17	1931	1772.42	1811.63	1826.09	1788.42	1646.65	1785.46	1759.38	1837.76	1782.93	1750.91	1833.43	1917.65	1976.59	2076.98	1989.66	1476.01	1303.96	1332.79	1357.24	1356.93	1213.3	1308.1	1331.84	1333.54	1257.81	1166.74	1367.77	1399.91	1429.31	1454.94	1327.16	1616.85	1398.89	1486.3	1410.69
sp|Q92688|AN32B_HUMAN	sp	Q92688	HUMAN	ANP32B	Acidic leucine-rich nuclear phosphoprotein 32 family member B	39	34	1	0	17	34	15	19	4526.49	4822.6	4587.42	4614.01	4686.3	4214.88	4762.88	4745.25	4612.15	4379.68	4354.98	4923.01	4998.88	4924.44	4942.75	4981.82	4917.09	4904.01	4963.15	5027.8	5142.63	4913.67	5016.54	5052.78	5101.82	4866.37	4245.93	5189.15	5148.22	5152.17	5009.79	4636.91	3029.72	3248.37	3002.95	2877.4
sp|Q9BTT0|AN32E_HUMAN	sp	Q9BTT0	HUMAN	ANP32E	Acidic leucine-rich nuclear phosphoprotein 32 family member E	14	13	1	0	13	21	9	11	1952.32	1995.4	1914.51	1957.85	1828.42	1749.98	1944.05	1986.84	1931.33	1878.83	1796.44	2087.17	2072.25	2053.55	2048.89	1958.78	1319.2	1422.64	1373.82	1368.77	1406.83	1228.36	1402.35	1439.35	1415.85	1352.6	1197.6	1436.3	1360.45	1341.88	1324.93	1208.06	1363.53	1380.24	1453.26	1324.35
sp|P15144|AMPN_HUMAN	sp	P15144	HUMAN	ANPEP	Aminopeptidase N	100	107	1	0	44	56	66	79	8516.15	8701.86	9218.04	9662.7	8688.79	10529	8452.31	9570.7	9074.6	9122.07	9805.11	7654.02	8474.53	9768.15	9157.27	9546.48	9340.63	11518.8	10762.3	10312.7	9644.01	9209.43	9685.02	9890.85	9920.6	10335.7	11272.3	9881.04	10006.7	10365.2	9853.07	12376.7	7491.59	7102.81	6851.4	7380.36
sp|Q9H6X2|ANTR1_HUMAN	sp	Q9H6X2	HUMAN	ANTXR1	Anthrax toxin receptor 1	1	5	1	0	6	7	8	5	72.5191	58.2101	58.9293	42.9575	47.7167	37.768	54.9111	69.8942	25.2319	50.09	42.0982	66.6246	62.6411	88.4878	29.0724	41.1772	394.869	383.763	416.039	357.957	287.048	304.64	449.006	384.382	333.505	294.906	323.02	483.517	438.914	539.154	428.089	387.295	961.9	925.075	765.593	919.587
sp|P58335|ANTR2_HUMAN	sp	P58335	HUMAN	ANTXR2	Anthrax toxin receptor 2	9	8	1	0	5	5	4	6	1141.75	1110.13	1182.93	1102.7	946.617	1049.77	1094.91	1190.61	1174.31	1225.21	1279.53	981.999	1012.69	993.992	988.447	1232.2	795.153	992.345	921.887	773.309	665.219	627.626	859.364	833.041	812.617	827.602	885.207	941.031	957.726	945.88	1122.75	1578.18	580.626	498.201	605.724	594.577
sp|P04083|ANXA1_HUMAN	sp	P04083	HUMAN	ANXA1	Annexin A1	119	105	1	0	101	85	69	76	13712.3	13084.3	12878.9	13135.8	13148.9	14015.6	13023.4	12926.6	13319.2	13616.1	14292.9	13420	13744	13624.6	14184.7	14255.2	10861	10521.5	9943.11	10130.5	10454.5	11649.3	10106.4	10262.4	10305.8	10604.4	11602	10400.3	10475.8	10342.8	10584.9	10556.9	15317.9	16614.7	15602.8	18924.7
sp|P50995|ANX11_HUMAN	sp	P50995	HUMAN	ANXA11	Annexin A11	43	53	1	0	37	38	28	34	3625.94	3420.81	3337.67	3511.5	3277.43	3745.05	3433.01	3376.64	3462.04	3283.16	3585.11	3627.02	3571.81	3715.59	3683.27	3782.12	4870.2	4299.1	4384.63	4300.54	4384.69	4781.2	4414.34	4303.75	4267.98	4371.53	4637.49	4512.57	4644.2	4675.31	4711.35	4441.98	6352.33	6051.14	6105.69	5868.67
sp|P07355-2|ANXA2_HUMAN	sp	P07355-2	HUMAN	ANXA2	Isoform 2 of Annexin A2	82	69	1	0	74	86	66	71	7238.33	7362.12	7183.68	7170.97	7110.06	7798.9	7413.56	7193.63	7164.43	6916.11	7369.35	7505.21	7605.23	7466.35	7499.18	7339.65	5529.29	4850.45	5278.81	5293.24	5446.09	5894.39	5415.03	5250.39	5368.97	5347.27	5907.77	5448.45	5414.68	5508.42	5443.83	5184.32	9830.9	9770.34	8829.54	9031.95
sp|P12429|ANXA3_HUMAN	sp	P12429	HUMAN	ANXA3	Annexin A3	1	2	1	0	10	6	4	9	170.815	165.738	172.625	188.059	170.165	185.42	188.89	160.941	176.027	182.927	177.084	192.571	185.333	191.961	202.387	193.516	150.389	204.738	195.007	209.445	193.592	260.45	191.556	190.557	199.285	192.147	250.039	187.132	219.281	209.014	185.154	179.492	1599.85	1584.34	1627.04	1518.41
sp|P09525|ANXA4_HUMAN	sp	P09525	HUMAN	ANXA4	Annexin A4	60	62	1	0	42	36	34	43	5107.81	4764.99	4799.65	4716.76	4869.31	5196.06	4872.24	4837.02	4799.4	4841.25	5262.17	4993.7	4852.65	5115.92	5346.09	5547.27	5217.29	4526.19	4489.21	4510.76	4687.75	5193.49	4555.9	4455.73	4453.98	4628.54	5403.41	4627.98	4743.85	4915.99	5243.21	5834.02	6191.26	6855.74	6629.5	7099.08
sp|P08758|ANXA5_HUMAN	sp	P08758	HUMAN	ANXA5	Annexin A5	179	148	1	0	139	130	97	132	20979.7	20818	20177.1	20490.5	21018.4	22134.9	20715.5	20203.7	20365	20460.6	20903.5	20844.6	21514	22020.1	22405.1	23067.5	17310.8	15834.3	15442.8	15624.9	15849.7	18837.3	15651.2	15893.4	16118.4	16103	18803.9	15640.9	16224.2	16589	16764.3	18142	25673.7	26377.3	26026.6	28272.7
sp|P08133|ANXA6_HUMAN	sp	P08133	HUMAN	ANXA6	Annexin A6	237	189	1	0	194	178	145	202	25648	25346.1	24969.8	25110.2	25215.5	26165.4	25227.1	25250.4	24785.9	24807	25543.3	25325.5	25915.4	26946.4	27436.7	27167.4	19511.5	18641.6	18550.6	18652.8	18878.2	19638.8	18391.5	18571	18596.3	18554.2	19821.4	18912.7	18900.8	18918.5	19124.3	19426.6	42905.2	44470.7	47370.3	47411.4
sp|P20073|ANXA7_HUMAN	sp	P20073	HUMAN	ANXA7	Annexin A7	44	53	1	0	39	38	41	43	4100.91	4097.84	3919.86	4006.98	4020.71	4141.76	4073.72	3966.68	3858.74	3989.87	4071.81	4256.98	4292.73	4346.31	4407.84	4161.14	4801.8	4545.31	4514.51	4495.84	4645.2	5049.79	4496.51	4490.88	4564.01	4736.56	5248.29	4707.38	4743.4	4738.86	4778.46	4894.3	6272.76	5897.41	6061.68	5700.15
sp|Q10567|AP1B1_HUMAN	sp	Q10567	HUMAN	AP1B1	AP-1 complex subunit beta-1	44	35	1	0	25	24	22	21	5057.27	4930.01	4905.21	4768.25	4661.75	4463.34	4985.64	4786.38	4659.13	4565.18	4353.86	5137.22	5028.31	5132.86	5040.14	4797.14	3468.44	3403.22	3416.12	3275.92	3313.43	3444.35	3413.21	3324.04	3452.37	3220.1	3504.48	3482.21	3493.5	3419.3	3487.37	3401.3	4002.17	4209.42	4149.91	3904.67
sp|O43747-2|AP1G1_HUMAN	sp	O43747-2	HUMAN	AP1G1	Isoform 2 of AP-1 complex subunit gamma-1	32	37	1	0	30	27	24	36	3999.05	3808.85	3904.25	3868.23	3793.85	3777.73	3947.71	3857.7	3868.22	4031.31	3926	4028.56	4018.94	4123.02	4192.92	4119.99	4010.1	3787.39	3842.89	3766.34	3665.15	3356.07	3773.15	3866.15	3858.69	3764.63	3577.49	3865.44	3799.94	3891.71	3943.51	3867.75	5405.77	5706.21	5210.39	5364.03
sp|O75843|AP1G2_HUMAN	sp	O75843	HUMAN	AP1G2	AP-1 complex subunit gamma-like 2	1	0	0	1	0	1	1	1	36.7158	32.1609	29.5521	37.6851	34.7538	30.1672	32.8912	32.1341	36.4832	36.656	33.5238	33.5208	35.71	33.1722	31.7185	34.0713	0	0	0	0	0	0	0	0	0	0	0	0	0	0	0	0	0	0	0	0
sp|Q9BXS5-2|AP1M1_HUMAN	sp	Q9BXS5-2	HUMAN	AP1M1	Isoform 2 of AP-1 complex subunit mu-1	29	26	1	0	15	22	14	18	2195.65	2017.98	2195.66	2066.52	1974.52	1839.1	2014.49	2030.84	1988.33	2003.67	1846.33	2173.35	2037.97	2134.86	2086.99	1976.49	1845.63	1593.17	1991.62	1652.16	1559.63	1258.27	1717.75	1810.34	1664.02	1675.96	1393.84	1778.77	1750.56	1737.61	1821.33	1692.13	1993.44	1965.38	1945.95	1788.22
sp|P61966|AP1S1_HUMAN	sp	P61966	HUMAN	AP1S1	AP-1 complex subunit sigma-1A	7	5	1	0	3	5	3	6	808.197	798.86	819.688	844.114	834.943	788.796	806.99	793.047	816.744	853.112	767.605	841.484	809.812	827.053	820.547	810.329	339.605	372.062	388.304	372.496	349.241	279.425	367.163	358.2	350.97	365.95	311.91	379.487	352.999	344.627	375.713	348.921	242.622	244.39	232.494	252.794
sp|P56377|AP1S2_HUMAN	sp	P56377	HUMAN	AP1S2	AP-1 complex subunit sigma-2	5	2	1	0	4	5	5	5	428.216	394.96	422.518	399.052	397.817	383.064	401.77	375.451	411.468	411.806	421.561	435.001	420.695	417.947	462.453	462.426	294.644	291.695	305.766	300.452	267.859	208.803	290.547	298.077	290.258	289.09	260.189	292.884	289.193	262.042	307.688	308.232	572.107	563.814	523.562	488.37
sp|O95782|AP2A1_HUMAN	sp	O95782	HUMAN	AP2A1	AP-2 complex subunit alpha-1	91	74	1	0	64	64	65	59	9898.11	9545.4	9742.26	9672.04	9802.43	9098.82	9765.4	9089.86	9136.62	9106.64	8797.09	10451.3	9642.14	10255.7	10385.5	9915.46	6304.7	6438.01	6174.22	6047.21	6056.62	5956.7	6423.24	6326.26	6102.15	6108.63	5580.86	6385.1	6301.12	6192.19	6332.91	5991.56	9780.43	10312	9810.3	9386.84
sp|O94973-2|AP2A2_HUMAN	sp	O94973-2	HUMAN	AP2A2	Isoform 2 of AP-2 complex subunit alpha-2	31	33	1	0	30	29	16	27	3268.93	3318.64	3282.21	3173.9	3274.17	3169.34	3401.23	3067	3024.04	3197.05	3023.69	3400.48	3219.07	3351.79	3539.34	3434.48	3051.33	3065.85	3060.28	3018.4	2979.53	2895.66	3070.56	3045.05	2993.17	3002.69	2746.74	3186.55	3087.78	3160.77	3124.32	2890.28	5905.8	6052.57	5738.9	5690.9
sp|P63010-2|AP2B1_HUMAN	sp	P63010-2	HUMAN	AP2B1	Isoform 2 of AP-2 complex subunit beta	105	82	1	0	69	60	51	68	15913.9	15369.2	15560.2	15072.5	14957	14114	15517.7	14857.5	14725.9	14849.5	14173.9	16149.5	15883.9	16183.1	16226.5	15616.6	11437.4	11147.7	11241.6	10835.1	10634.7	10161.3	11023.7	10988.8	11015.9	10483.8	10604.1	11266.8	11153.1	11283.5	11330.9	11133.5	12898	13264.9	13063.3	12873.3
sp|Q96CW1|AP2M1_HUMAN	sp	Q96CW1	HUMAN	AP2M1	AP-2 complex subunit mu	60	57	1	0	44	29	24	41	7278.26	6948.08	7090.6	6980.8	6854.79	6750.4	7196.4	6999.74	6596.59	6870.2	6553.74	7453.15	7265.95	7462.53	7288.6	7165.39	5700.59	5044.58	5622.5	5320.85	5285.56	4152.74	5482.3	5546.14	5505.58	5280.7	4780.92	5554.08	5432.98	5573.68	5644.74	5439.54	7940.35	7385.78	7777.76	7759.62
sp|P53680|AP2S1_HUMAN	sp	P53680	HUMAN	AP2S1	AP-2 complex subunit sigma	20	25	1	0	17	8	14	12	1907.86	1813.78	1809.6	1773.58	1740.71	1726.35	1847.39	1855.03	1720.85	1788.01	1796.66	1887.66	1860.93	1914.58	1903.72	1888.47	2011	1756.18	1946.36	1899.78	1854.64	1641.38	1993.17	1950.09	1889.96	1984.17	1777.03	2039.17	2063.24	1962.94	2036.36	1976.42	2800.57	2766.69	2870.01	2694.16
sp|O00203|AP3B1_HUMAN	sp	O00203	HUMAN	AP3B1	AP-3 complex subunit beta-1	61	62	1	0	41	50	38	49	7528.86	7321.45	7242.92	7234.08	7078.12	7695.99	7401.17	7289.58	7200.51	7213.68	7505.53	7406.2	7311.5	7660.03	7676.63	7801.76	6209.04	5621.5	5882.45	5784.84	5826.01	6358.88	5838.55	5840.91	5897.52	5970.11	6406.03	6085.84	5971.37	6056.71	6204.03	6140.99	9060.92	9418.29	8949.04	8746.11
sp|O14617-5|AP3D1_HUMAN	sp	O14617-5	HUMAN	AP3D1	Isoform 5 of AP-3 complex subunit delta-1	42	50	1	0	49	40	27	44	4647.04	4434.63	4553.78	4534.6	4406.2	4648.85	4423.52	4527.71	4382.21	4522.09	4481.82	4577.42	4666.27	4784.95	4812.82	4578.33	6002.2	5628.83	6168.69	5773.82	5731.81	5263.96	5744.91	5844.53	5768.23	5950.71	6088.57	6011.38	5891.64	5985.1	5830.77	5945.7	8451.31	8047.18	8183.48	8002.62
sp|Q9Y2T2|AP3M1_HUMAN	sp	Q9Y2T2	HUMAN	AP3M1	AP-3 complex subunit mu-1	26	23	1	0	16	14	10	9	2326.98	2312.09	2238.84	2322.9	2262.42	2328.41	2304.11	2233	2250.92	2271.38	2365.02	2424.12	2268.72	2406.14	2349.45	2454.62	1790.26	1743.76	1726.87	1734.99	1725.16	1824.3	1771.84	1765.97	1729.43	1774	1849.03	1783.31	1810.49	1772.64	1830.8	1786.61	2795.87	3109.47	2844.2	2916.83
sp|P53677|AP3M2_HUMAN	sp	P53677	HUMAN	AP3M2	AP-3 complex subunit mu-2	2	2	1	0	4	2	3	3	125.778	119.101	125.778	126.586	133.792	124.93	132.899	136.487	124.245	120.787	112.275	119.791	136.226	130.735	129.23	122.198	138.027	140.618	143.608	138.579	124.15	153.514	144.984	136.848	127.652	138.915	131.715	136.257	137.326	135.496	146.126	141.974	523.909	497.299	495.872	458.147
sp|Q92572|AP3S1_HUMAN	sp	Q92572	HUMAN	AP3S1	AP-3 complex subunit sigma-1	19	21	1	0	9	11	7	9	2454.53	2409.66	2370.78	2283.77	2303.61	2307.06	2419.73	2369.07	2307.96	2318.63	2266.48	2468.26	2496.71	2411.04	2327.69	2288.13	2059.4	1882.91	1855.22	1907.85	1896.51	2025.75	1870.71	1846.96	1870.3	1912.75	1913.61	1913.66	1956.06	1935.32	2045.87	1907.29	1065.93	1247.77	1328.74	1197.81
sp|Q9Y6B7|AP4B1_HUMAN	sp	Q9Y6B7	HUMAN	AP4B1	AP-4 complex subunit beta-1	0	1	0	1	1	6	3	4	0	0	0	0	0	0	0	0	0	0	0	0	0	0	0	0	36.4578	25.9106	30.3402	23.2573	24.1923	25.0863	24.5267	28.5038	31.0648	31.2624	19.6834	30.9641	25.6183	27.7024	29.553	29.4709	164.781	172.511	178.323	174.551
sp|Q9UPM8|AP4E1_HUMAN	sp	Q9UPM8	HUMAN	AP4E1	AP-4 complex subunit epsilon-1	6	2	1	0	8	6	6	14	448.366	412.904	438.991	394.109	380.587	417.428	414.772	398.149	431.984	404.846	409.253	428.401	410.055	482.625	464.057	445.772	220.15	209.343	223.377	205.292	201.719	200.23	216.124	225.855	213.176	223.955	205.697	211.437	236.834	216.808	225.788	218.937	1415.24	1443.76	1478.27	1411.22
sp|Q9Y587-2|AP4S1_HUMAN	sp	Q9Y587-2	HUMAN	AP4S1	Isoform 2 of AP-4 complex subunit sigma-1	1	0	0	1	0	2	1	0	15.103	13.9772	16.469	18.6252	15.4348	15.6508	13.4926	15.5816	15.9463	11.9818	18.4769	20.8703	15.4887	13.7741	16.7011	17.4937	0	0	0	0	0	0	0	0	0	0	0	0	0	0	0	0	0	0	0	0
sp|O43299|AP5Z1_HUMAN	sp	O43299	HUMAN	AP5Z1	AP-5 complex subunit zeta-1	1	2	1	0	2	4	4	6	89.2516	75.776	65.5727	52.5676	39.143	42.1442	67.0972	68.4886	52.8029	52.616	52.7639	87.448	82.1145	60.1433	49.2936	60.6005	173.507	154.058	156.181	117.793	114.536	86.9911	170.857	142.551	121.963	114.811	107.354	200.153	189.469	175.456	169.059	161.87	182.709	197.536	173.501	182.785
sp|O14727|APAF_HUMAN	sp	O14727	HUMAN	APAF1	Apoptotic protease-activating factor 1	5	7	1	0	16	22	13	12	365.469	355.628	354.518	344.34	360.72	357.775	345.769	359.396	356.311	354.621	366.984	359.128	342.715	380.329	367.344	367.235	551.781	491.313	551.272	548.27	531.197	568.691	541.097	546.368	547.494	564.207	579.726	553.288	558.661	565.792	572.242	606.804	1697.12	1831.62	1788.06	1656.79
sp|Q99767|APBA2_HUMAN	sp	Q99767	HUMAN	APBA2	Amyloid beta A4 precursor protein-binding family A member 2	1	0	0	1	0	5	1	4	41.8744	43.0091	33.2968	41.5112	28.9012	26.1635	42.5539	36.7905	39.1667	35.2673	27.2897	39.7793	32.6806	17.6065	9.30636	14.1592	0	0	0	0	0	0	0	0	0	0	0	0	0	0	0	0	0	0	0	0
sp|O00213|APBB1_HUMAN	sp	O00213	HUMAN	APBB1	Amyloid beta A4 precursor protein-binding family B member 1	1	1	1	0	2	3	1	2	42.8632	37.9072	34.9379	33.0869	21.5588	21.4894	41.4205	36.6052	32.343	28.6382	29.5722	44.9386	37.3824	29.2816	18.0086	17.6358	19.3701	16.3825	14.0447	14.0411	11.4598	12.2906	18.039	23.6808	14.1057	17.0196	10.5529	25.012	25.2548	17.9079	21.3301	18.9787	488.164	482.563	483.156	436.637
sp|Q7Z5R6|AB1IP_HUMAN	sp	Q7Z5R6	HUMAN	APBB1IP	Amyloid beta A4 precursor protein-binding family B member 1-interacting protein	2	3	1	0	5	2	3	10	35.7774	38.4355	36.4807	35.875	29.5053	33.8907	31.9169	36.7264	35.6746	33.7436	31.7741	34.5798	36.4101	41.1359	35.0059	39.0017	154.65	136.09	134.861	138.598	135.913	154.088	156.281	132.316	139.847	131.021	126.329	151.881	147.023	141.354	143.665	151.166	673.136	684.482	771.237	708.62
sp|Q92870-4|APBB2_HUMAN	sp	Q92870-4	HUMAN	APBB2	Isoform 4 of Amyloid beta A4 precursor protein-binding family B member 2	1	1	1	0	9	3	9	4	45.253	60.7526	47.0447	42.0558	45.6398	39.7712	57.2379	55.591	50.5984	43.8051	40.4844	56.8944	54.99	46.2813	49.2047	51.2637	80.5536	70.1419	72.1102	63.6024	67.5804	62.8274	76.4224	68.441	70.826	63.2396	49.0253	75.2362	76.5516	71.6765	85.566	93.1925	1438.28	1170.92	1235.94	1326.88
sp|P25054|APC_HUMAN	sp	P25054	HUMAN	APC	Adenomatous polyposis coli protein	0	1	0	1	16	8	6	10	0	0	0	0	0	0	0	0	0	0	0	0	0	0	0	0	34.4152	23.8199	34.6465	29.6309	34.4859	27.3179	29.7506	29.8021	28.5012	45.1009	36.9427	34.343	35.6234	31.3174	30.4276	27.9905	2103.44	1987.36	2287.42	2024.38
sp|Q8J025|APCD1_HUMAN	sp	Q8J025	HUMAN	APCDD1	Protein APCDD1	1	1	1	0	0	1	0	0	68.8139	44.5915	47.354	31.7919	31.6796	42.1835	40.9065	45.6291	51.5608	39.9063	41.1579	43.9887	45.574	49.5186	49.8018	55.9028	24.0348	18.8211	20.4987	12.1476	8.13981	9.59357	20.8084	15.2553	13.5736	9.51704	11.0272	26.6619	29.3273	23.9346	25.9334	15.5897	0	0	0	0
sp|P13798|ACPH_HUMAN	sp	P13798	HUMAN	APEH	Acylamino-acid-releasing enzyme	29	29	1	0	25	31	23	27	3169.75	3011.9	3000.52	3014.8	2963.14	2741.01	3013.9	3002.49	2997.83	2886.86	2876.86	3103	3125.67	3263.2	3210.51	3201.16	2414.06	2263.8	2305.62	2284.14	2264.4	2145.2	2359.85	2298.82	2254.35	2226.76	2082.72	2370.65	2359.77	2373.47	2356.46	2265.15	2859.09	3271.96	3111.47	3129.25
sp|P27695|APEX1_HUMAN	sp	P27695	HUMAN	APEX1	DNA-(apurinic or apyrimidinic site) lyase	31	29	1	0	23	21	26	19	3174.73	3034.7	3032.99	3122.03	3052.06	2902.3	2958.39	2963.94	3033.72	2959.1	2990.55	3130.62	3132.58	3219.33	3372.03	3347.94	2232.43	2145.47	2220.72	2224.43	2254.11	2189.04	2273.48	2236.21	2248.64	2146.54	1968.36	2260.37	2215.85	2244.8	2166.69	2165.26	3399.67	3510.95	3300.5	3214.32
sp|Q9BZZ5|API5_HUMAN	sp	Q9BZZ5	HUMAN	API5	Apoptosis inhibitor 5	31	26	1	0	29	30	21	24	3554.15	3498.59	3553.47	3434.89	3280.57	2993.43	3575.05	3448.45	3395.3	3387.82	3163.9	3657.54	3538.55	3552.96	3740.95	3553.38	3088.65	3103.75	3021.58	3040.54	2870.71	2705.64	2989.14	3017.56	2983.77	2829.05	2544.07	2966.36	3029.4	3067.3	3080.99	2840.03	4756.95	4680.99	4595.18	4366.84
sp|Q96GX9|MTNB_HUMAN	sp	Q96GX9	HUMAN	APIP	Methylthioribulose-1-phosphate dehydratase	7	9	1	0	7	5	5	6	710.788	705.495	701.851	666.315	631.392	612.645	708.161	704.611	676.315	665.501	598.178	767.947	723.679	807.585	745.64	725.361	747.034	685.596	743.92	723.945	725.658	678.616	718.979	722.068	722.239	696.82	585.823	697.056	724.991	693.815	732.117	671.923	1377.05	1110.45	1156.28	1130.5
sp|Q06481|APLP2_HUMAN	sp	Q06481	HUMAN	APLP2	Amyloid-like protein 2	0	1	0	1	8	8	4	6	0	0	0	0	0	0	0	0	0	0	0	0	0	0	0	0	50.2353	27.0549	26.9879	20.2153	17.5093	17.1227	31.1556	25.7627	22.8643	26.5155	31.7026	84.9595	68.9592	53.7549	44.8062	59.0971	2781.71	2358.61	2188.44	2834.56
sp|Q9HDC9|APMAP_HUMAN	sp	Q9HDC9	HUMAN	APMAP	Adipocyte plasma membrane-associated protein	32	31	1	0	20	22	26	21	3558.21	3471.29	3556.9	3488.19	3514.98	3907.46	3503	3400.02	3421.91	3535.23	3647.82	3544.06	3517.22	3645.25	3767.79	3736.93	3196.02	3063.82	3185.58	3124.9	3019.42	3019.38	3131.81	3124.29	3019.2	3191.28	3714.74	3184.98	3254.98	3188.23	3138.14	3278.94	2814.16	3011.98	3066.82	2881.34
sp|P04114|APOB_HUMAN	sp	P04114	HUMAN	APOB	Apolipoprotein B-100	6	7	1	0	7	7	5	5	542.647	489.64	454.781	480.37	510.998	683.554	490.623	479.466	450.858	441.161	579.899	644.263	567.381	433.91	355.86	310.313	535.243	814.749	637.929	603.45	542.569	656.622	729.774	622.703	560.967	567.889	674.212	722.831	701.052	573.246	512.299	510.614	1444.7	826.672	750.987	969.62
sp|Q9NRW3|ABC3C_HUMAN	sp	Q9NRW3	HUMAN	APOBEC3C	DNA dC->dU-editing enzyme APOBEC-3C	4	3	1	0	1	3	1	1	243.698	226.354	210.572	217.508	211.724	242.358	225.809	227.984	210.958	216.007	220.431	240.064	215.578	207.019	195.269	194.66	682.019	483.969	653.177	579.784	623.157	560.793	597.496	593.402	595.391	582.517	673.215	644.727	649.507	620.811	649.77	652.725	106.896	111.048	103.641	115.147
sp|Q8IUX4|ABC3F_HUMAN	sp	Q8IUX4	HUMAN	APOBEC3F	DNA dC->dU-editing enzyme APOBEC-3F	2	2	1	0	1	0	2	1	223.709	185.665	191.82	183.289	166.224	235.433	191.576	206.003	187.746	187.683	223.225	204.422	200.366	213.284	232.25	297.541	120.611	123.743	114.405	119.993	110.181	135.872	116.267	116.521	113.747	122.941	125.446	133.387	125.844	122.311	172.228	242.14	119.685	117.408	113.754	117.032
sp|Q9HC16|ABC3G_HUMAN	sp	Q9HC16	HUMAN	APOBEC3G	DNA dC->dU-editing enzyme APOBEC-3G	1	3	1	0	0	1	2	0	58.6043	49.6374	53.9982	52.7859	58.0636	59.7905	45.9844	56.6194	50.5874	55.905	54.4517	53.0406	55.1793	53.545	60.0392	59.71	280.843	227.762	259.637	247.56	229.374	256.745	261.71	240.033	239.589	242.661	268.484	259.209	268.607	272.358	495.335	723.563	0	0	0	0
sp|P02649|APOE_HUMAN	sp	P02649	HUMAN	APOE	Apolipoprotein E	3	1	1	0	3	1	1	1	141.754	199.752	207.309	230.884	376.791	339.627	196.715	263.882	261.045	248.777	285.769	196.461	249.456	194.14	231.603	208.528	16.9183	17.0686	21.6829	18.3875	27.6576	28.3766	20.5584	24.3945	22.7961	23.6183	34.1153	19.135	20.2884	21.8835	19.3235	21.5282	243.461	272.263	191.857	217.287
sp|P02749|APOH_HUMAN	sp	P02749	HUMAN	APOH	Beta-2-glycoprotein 1	1	1	1	0	2	1	2	2	210.443	287.53	278.492	295.645	464.03	549.574	262.133	297.311	286.092	359.445	540.865	274.313	326.414	281.782	281.287	355.729	54.4439	72.2142	61.2228	60.135	72.4203	149.956	54.1097	66.2213	78.2964	76.4155	181.039	44.6082	58.2518	58.9728	53.2673	68.9865	723.114	490.428	338.952	453.861
sp|Q9BQE5|APOL2_HUMAN	sp	Q9BQE5	HUMAN	APOL2	Apolipoprotein L2	8	3	1	0	9	8	8	13	786.569	742.217	776.931	757.548	665.553	890.5	703.697	753.952	814.942	806.822	925.503	782.366	754.74	871.556	1320.21	2704.19	267.148	259.781	296.465	252.908	244.496	276.493	262.316	243.178	258.609	277.166	296.083	244.21	260.583	315.306	769.616	1560.72	2066.7	1991.58	2123.31	1881.72
sp|Q9BWW8|APOL6_HUMAN	sp	Q9BWW8	HUMAN	APOL6	Apolipoprotein L6	1	2	1	0	0	1	0	2	103.725	75.6129	82.8869	64.6573	37.1863	53.5067	69.8932	162.444	246.675	245.32	226.035	64.9069	48.4077	318.491	589.711	593.494	75.8644	74.9329	47.4663	46.4727	35.6472	44.6353	72.4517	80.4878	121.552	134.413	124.514	72.7714	72.967	201.661	696.311	646.616	0	0	0	0
sp|Q9BUR5|MIC26_HUMAN	sp	Q9BUR5	HUMAN	APOO	MICOS complex subunit MIC26	2	1	1	0	5	3	2	1	92.2113	102.444	102.526	88.7605	106.079	111.994	103.708	103.556	95.9982	94.3152	99.8877	99.7183	97.2367	96.2324	99.4891	104.775	60.0738	78.3363	63.065	68.0591	65.997	65.5283	63.156	67.5716	65.4729	67.2563	61.6066	66.0741	71.9794	65.4999	66.7617	55.9	495.119	507.409	536.524	528.076
sp|Q6UXV4|MIC27_HUMAN	sp	Q6UXV4	HUMAN	APOOL	MICOS complex subunit MIC27	8	6	1	0	11	9	10	9	336.852	338.553	345.828	338.008	343.785	351.608	369.192	337.532	355.336	353.138	366.396	353.021	350.059	344.619	362.724	383.242	547.921	615	558.633	594.132	573.171	637.044	553.5	582.499	553.346	593.8	667.713	566.25	557.549	551.178	551.128	528.815	1778.23	1615.48	1693.61	1688.28
sp|P05067|A4_HUMAN	sp	P05067	HUMAN	APP	Amyloid beta A4 protein	5	5	1	0	12	14	15	14	559.4	482.805	245.078	176.628	142.697	160.267	489.577	236.739	255.024	253.25	267.868	732.839	425.102	246.585	265.889	356.242	699.703	645.905	328.827	190.935	120.674	122.103	621.049	339.037	246.248	208.67	237.956	1035.01	972.681	764.081	675.968	937.921	2659.75	2413.49	2313.04	3129.24
sp|Q92624|APBP2_HUMAN	sp	Q92624	HUMAN	APPBP2	Amyloid protein-binding protein 2	2	2	1	0	2	3	1	3	96.8537	95.214	69.1911	54.5427	36.3091	39.9491	91.0999	87.6896	83.6473	80.9213	82.6418	102.343	74.5057	52.4255	48.0665	71.5185	144.373	113.214	119.158	62.5515	46.4531	32.0359	132.481	105.571	98.5096	89.0214	84.5272	163.923	149.669	133.714	108.759	132.042	106.171	95.9091	133.84	135.76
sp|Q9UKG1|DP13A_HUMAN	sp	Q9UKG1	HUMAN	APPL1	DCC-interacting protein 13-alpha	2	3	1	0	18	14	19	21	69.1615	87.7909	71.3267	81.4147	71.2111	62.0666	70.1186	75.3875	63.8766	75.3356	79.7879	77.5046	78.0785	74.1474	66.6602	86.1368	316.112	327.091	300.058	294.66	283.815	302.996	310.177	290.113	277.883	276.774	291.658	312.366	319.176	293.585	298.646	270.97	2192.75	2170.98	2387.22	2124.63
sp|Q8NEU8|DP13B_HUMAN	sp	Q8NEU8	HUMAN	APPL2	DCC-interacting protein 13-beta	48	30	1	0	39	36	33	31	4234.88	4105.71	4034.64	3992.04	3796.04	3871.8	4202.46	4003.11	3915	3862.52	3817.07	4242.2	4376.66	4328.53	4103.13	4198.28	1971.98	1771.58	1851.72	1778.61	1772.17	1720.78	1818.76	1779.6	1770.73	1702.32	1734.34	1924.75	1939.41	1969.38	1882.49	1621.67	4314.9	3947.07	3812.87	3835.62
sp|P07741|APT_HUMAN	sp	P07741	HUMAN	APRT	Adenine phosphoribosyltransferase	27	27	1	0	20	17	16	20	2004.02	1905.21	1902.78	2032.68	2240.62	2327.14	1892.22	1907.28	1946.9	2191.17	2296.35	1957.84	1989.35	2128.38	2418.27	2438.36	3125.5	2352.62	2725.45	2696.33	2701.26	3067.99	2724.19	2695.16	2644.89	2619.25	2762.96	2825.01	2776.08	2937.99	2985.03	3119.03	2501.55	2551.47	2599.94	2581.01
sp|O60306|AQR_HUMAN	sp	O60306	HUMAN	AQR	Intron-binding protein aquarius	15	10	1	0	9	21	18	22	1614.86	1578.51	1543.25	1565.48	1464.49	1513.19	1593.48	1550.65	1470.16	1400.12	1379.83	1630.32	1619.63	1414.44	1278.37	1234.93	578.185	600.068	598.637	608.282	605.936	554.94	619.475	590.558	578.335	581.873	595.985	621.344	615.046	576.254	532.903	517.034	1786.81	1815.38	1696.42	1639.81
sp|P10398|ARAF_HUMAN	sp	P10398	HUMAN	ARAF	Serine/threonine-protein kinase A-Raf	3	2	1	0	8	7	8	3	93.4391	207.29	191.138	192.997	184.401	92.1857	202.51	156.956	193.323	129.632	86.0121	216.621	215.695	230.542	114.526	111.497	174.912	106.661	184.785	171.589	159.421	155.825	166.807	164.975	151.198	167.75	154.75	176.312	175.17	159.254	173.675	171.474	1075.21	1151.28	1086.5	1014.34
sp|Q96P48|ARAP1_HUMAN	sp	Q96P48	HUMAN	ARAP1	Arf-GAP with Rho-GAP domain, ANK repeat and PH domain-containing protein 1	8	14	1	0	13	24	16	16	689.448	687.003	660.321	630.153	648.572	677.938	686.651	680.262	664.425	651.821	669.037	676.198	707.093	698.406	657.772	658.027	1037.27	952.308	987.195	936.04	933.746	1038.92	1063.93	1019.54	1004.07	986.044	960.032	1047.5	1049.36	1049.74	1016.8	970.658	2081.68	1890.7	1914.34	1836.1
sp|P48444|COPD_HUMAN	sp	P48444	HUMAN	ARCN1	Coatomer subunit delta	86	73	1	0	57	50	52	63	11668.1	11798.9	11641.3	11505.2	11691.1	10907.7	11819.5	11650.8	11210.4	11722.2	10668.2	12337.5	12248.7	12810.9	12308.6	11940.8	8257.38	7888.71	8049.58	8089.67	8253.98	8252.58	7986.74	8024.84	8175.45	7862.88	7575.27	8142.94	8063.13	8043.78	8214.53	8170.29	15273.1	14586.9	14359	14186.3
sp|P84077|ARF1_HUMAN	sp	P84077	HUMAN	ARF1	ADP-ribosylation factor 1	42	36	1	0	17	16	21	22	6404.99	6549.14	6247.71	5961.89	6087.99	5775.25	5893.22	7014.91	6166.09	5903.47	6379.42	5717.78	6790.49	6838.68	6667.78	7011.46	5739.59	5628.55	5977.31	6251.78	5372.62	6513.02	5979.54	5592.83	6311.56	5893.34	7651.56	5586.62	5787.41	5870.24	5508.34	5534.67	4431.33	3547.79	3741.3	4228.14
sp|P18085|ARF4_HUMAN	sp	P18085	HUMAN	ARF4	ADP-ribosylation factor 4	24	20	1	0	9	21	15	10	1767.33	1950.8	1815.66	1735.84	1913.62	1972.16	1748.97	2097.85	1724.07	1714.45	1909.37	1728.96	1969.67	1988.03	2069.25	2022.48	1969.96	2081.8	1672.52	1986.28	1816.71	2512.99	1839.51	1755	2006.02	1758.39	2520.58	1826.85	1923.51	2098.3	1918.3	2138.17	1762.43	1284.13	1486.55	1743.81
sp|P84085|ARF5_HUMAN	sp	P84085	HUMAN	ARF5	ADP-ribosylation factor 5	8	4	1	0	3	6	4	4	724.692	728.023	672.592	684.69	669.573	677.464	693.196	771.511	641.626	591.389	717.226	669.195	813.444	752.403	790.515	785.984	709.257	611.998	660.169	724.642	648.731	811.958	649.895	634.266	721.928	591.373	811.692	680.627	751.012	761.214	711.162	662.554	354.873	339.586	763.936	469.6
sp|P62330|ARF6_HUMAN	sp	P62330	HUMAN	ARF6	ADP-ribosylation factor 6	8	11	1	0	4	8	8	6	1104.11	967.244	1092.74	1043.73	949.165	1095.91	911.045	1045.75	1005.57	1022.34	1101.69	951.445	1019.08	1018.07	1095.53	1266.02	1417.67	1407.36	1797.26	1565.2	1400.45	1806.38	1500.67	1419.72	1473.06	1646.16	1590.98	1524.55	1316.52	1301.42	1422.75	1425.43	1132.07	892.529	1288.17	1077.46
sp|Q8N6T3|ARFG1_HUMAN	sp	Q8N6T3	HUMAN	ARFGAP1	ADP-ribosylation factor GTPase-activating protein 1	21	12	1	0	15	17	16	15	1158.97	1171.32	1156.49	1111.42	1052.58	980.298	1162.91	1135.23	1114.68	1103.71	1096.29	1252.95	1201.63	1196.62	1161.43	1138.91	614.824	559.503	551.537	531.05	521.512	507.428	541.682	546.824	535.653	559.23	544.872	549.152	593.221	598.032	624.004	577.433	1401.68	1507.56	1489.16	1295.26
sp|Q8N6H7|ARFG2_HUMAN	sp	Q8N6H7	HUMAN	ARFGAP2	ADP-ribosylation factor GTPase-activating protein 2	15	17	1	0	15	24	19	21	1088.33	1014.88	954.417	952.681	904.556	790.208	1055.56	996.525	988.243	957.126	902.563	1076.15	1056.63	1036.18	1025.36	886.628	1225.29	1154.95	1090.22	1071.99	1041.03	932.09	1176.63	1125.35	1082.13	1049.31	934.262	1144.25	1165.63	1201.1	1168.78	1003.6	2249.97	2232.32	2289.65	2160.28
sp|Q9NP61|ARFG3_HUMAN	sp	Q9NP61	HUMAN	ARFGAP3	ADP-ribosylation factor GTPase-activating protein 3	26	22	1	0	25	24	21	34	2741.91	2701.21	2681.23	2615.17	2569.05	2515.28	2851.45	2740.5	2754.74	2854.08	3011.05	2709.07	2777.2	2601.67	2619.27	2476.08	1985.47	1822.53	1795.91	1732.17	1699.9	1602.14	1815.46	1738.77	1784.68	1782.82	1827.27	1916.06	1962.45	1917.96	1904.65	1810.77	4184.58	4541.88	4040.94	4262.08
sp|Q9Y6D6|BIG1_HUMAN	sp	Q9Y6D6	HUMAN	ARFGEF1	Brefeldin A-inhibited guanine nucleotide-exchange protein 1	22	23	1	0	32	25	30	30	1452.87	1416.73	1416.38	1461.59	1437.26	1440.23	1452.61	1428.47	1412.85	1382.74	1374.59	1520.37	1480.62	1494.87	1478.14	1472.39	1788.42	1701.66	1759.54	1694.31	1643.63	1635.88	1734.8	1768.47	1699.57	1684.74	1668.26	1785.72	1720.12	1822.57	1774.76	1746.59	5239.69	5595.1	5404.26	5229.77
sp|Q9Y6D5|BIG2_HUMAN	sp	Q9Y6D5	HUMAN	ARFGEF2	Brefeldin A-inhibited guanine nucleotide-exchange protein 2	6	10	1	0	19	19	18	16	676.948	633.467	685.978	660.068	641.848	654.409	672.524	637.748	650.741	620.173	619.834	683.91	660.466	690.695	694.324	667.139	733.307	666.137	686.574	692.146	675.282	669.317	667.592	685.7	703.253	708.773	704.352	689.59	700.417	719.776	709.06	673.699	2594.05	2825.74	2812.8	2567.49
sp|P53367|ARFP1_HUMAN	sp	P53367	HUMAN	ARFIP1	Arfaptin-1	12	20	1	0	14	17	16	19	1382.05	1372.19	1299.68	1348.95	1302.87	1301.82	1404.77	1398.54	1399.04	1375.44	1416.26	1391.81	1384.48	1400.2	1349.49	1423.89	1316.7	1316.51	1273.92	1319.26	1266.5	1320.71	1358.04	1355.98	1344.85	1283.68	1287.17	1286.25	1308.05	1289.38	1313.08	1260.34	1669.66	1446.61	1677.78	1516.59
sp|P53365|ARFP2_HUMAN	sp	P53365	HUMAN	ARFIP2	Arfaptin-2	8	2	1	0	3	6	7	11	403.021	396.748	376.78	385.794	335.704	358.313	379.719	391.979	367.998	344.544	330.881	399.953	406.526	414.488	346.222	372.507	419.035	408.526	397.004	394.146	385.186	407.272	411.019	400.024	374.021	387.042	376.351	421.761	433.911	436.557	405.05	383.45	260.956	250.961	237.921	230.503
sp|Q13795|ARFRP_HUMAN	sp	Q13795	HUMAN	ARFRP1	ADP-ribosylation factor-related protein 1	6	6	1	0	3	2	4	2	594.146	551.418	581.349	533.073	526.972	545.399	567.71	554.627	521.018	538.982	511.307	580.53	568.68	558.198	582.81	511.348	696.084	688.508	652.7	644.975	657.758	651.136	671.22	692.303	645.731	645.946	618.758	680.481	694.146	664.64	677.992	641.686	327.397	364.232	337.04	378.038
sp|Q9NWB6|ARGL1_HUMAN	sp	Q9NWB6	HUMAN	ARGLU1	Arginine and glutamate-rich protein 1	7	6	1	0	10	12	9	11	562.104	549.154	555.014	541.665	572.11	547.943	599.037	552.605	571.652	611.432	596.217	560.823	612.846	632.33	645.151	609.584	269.674	223.956	226.998	235.801	239.382	252.505	236.614	219.803	228.08	255.325	263.515	239.41	247.736	234.969	267.371	271.852	1954.23	1658.74	1945.26	1593.88
sp|Q07960|RHG01_HUMAN	sp	Q07960	HUMAN	ARHGAP1	Rho GTPase-activating protein 1	33	34	1	0	36	27	29	32	3857.35	3543.14	3467.38	3426.56	3353.1	3201.68	3589.81	3499.32	3356.78	3442.2	3349.62	3877.01	3801.76	3963.01	3734.79	3868.58	3023.65	2616.46	3018.61	2831.06	2795.05	2605.5	2838.92	2846.36	2841.75	2768.32	2730.39	2950.88	2848.94	3041.14	2938.58	2955.29	7395.73	7634.78	7818.6	7474.78
sp|A1A4S6|RHG10_HUMAN	sp	A1A4S6	HUMAN	ARHGAP10	Rho GTPase-activating protein 10	8	8	1	0	9	12	9	13	1172.16	1215.34	1190.46	1182.8	1162.36	1222.07	1200.59	1108.13	1163.02	1211.52	1180.35	1219.93	1192.65	1259.43	1246.48	1228.95	1071.57	1009.61	960.045	968.026	964.807	1008.58	1052.39	951.984	953.02	1001.44	1006.35	983.59	1053.48	1026.78	1013.31	1007.41	1195.79	1353.34	1311.94	1277.45
sp|Q6P4F7|RHGBA_HUMAN	sp	Q6P4F7	HUMAN	ARHGAP11A	Rho GTPase-activating protein 11A	0	1	0	1	2	3	1	0	0	0	0	0	0	0	0	0	0	0	0	0	0	0	0	0	272.969	86.8484	267.348	261.102	257.025	256.022	249.199	267.827	281.22	259.4	289.942	289.659	251.28	286.934	259.47	249.057	272.698	332.06	229.311	258.955
sp|Q8IWW6|RHG12_HUMAN	sp	Q8IWW6	HUMAN	ARHGAP12	Rho GTPase-activating protein 12	11	9	1	0	16	14	9	12	1193.12	1219.08	1137.31	1152.65	1119.16	1150.48	1172.39	1116.63	1127.18	1097.68	1197.91	1147.04	1141.08	1158.14	1086.91	1236.3	1102.72	992.815	977.8	984.519	977.281	1016.27	998.613	956.583	998.996	1025.34	1009.84	995.239	1024.64	1026.71	1088.8	1139.25	2195.62	2201.57	2058.78	2078.81
sp|Q68EM7|RHG17_HUMAN	sp	Q68EM7	HUMAN	ARHGAP17	Rho GTPase-activating protein 17	20	14	1	0	28	24	24	22	2009.18	2038.49	1990.81	1969.23	1873.63	1852.3	1976.49	1960.34	1937.58	1905.35	1865.93	2066.37	2107.16	2153.65	2121.5	2059.8	1118.55	1252.29	1355.83	1271.52	1240.09	1345.23	1234.87	1442.36	1471.68	1423.03	1454.66	1120.52	1093.21	1103.88	1142.05	1107.49	5737.68	5662.72	5435.03	5288.28
sp|Q8N392|RHG18_HUMAN	sp	Q8N392	HUMAN	ARHGAP18	Rho GTPase-activating protein 18	49	33	1	0	20	32	26	18	4766.77	4982.82	4668.74	4613.86	4727.07	4218.28	4861.92	4708.46	4575.06	4457.39	4266.33	4846.65	4895.71	4859.64	4788.56	4533.27	2846.21	2985.5	2924.38	2875.95	2947.82	2791.35	3069.6	2983.77	2931.77	2836.94	2455.37	2961.78	2993.25	2890.71	2811.85	2414.58	2994.53	3349.57	3338.75	3220.91
sp|Q5T5U3|RHG21_HUMAN	sp	Q5T5U3	HUMAN	ARHGAP21	Rho GTPase-activating protein 21	6	4	1	0	21	19	13	24	344.133	302.181	311.877	275.364	267.964	253.591	343.206	293.06	294.623	301.524	280.615	344.807	335.8	331.793	331.647	304.278	122.042	135.643	114.353	123.44	123.483	121.782	138.375	133.327	120.593	124.861	126.045	116.501	121.535	115.616	135.044	119.99	3717.19	3570.82	3694.65	3577.07
sp|Q5T5U3-3|RHG21_HUMAN	sp	Q5T5U3-3	HUMAN	ARHGAP21	Isoform 3 of Rho GTPase-activating protein 21	2	0	0	1	2	0	0	0	86.7675	76.4941	74.3288	79.7302	75.3934	82.9836	87.6107	79.2955	73.9887	81.3711	71.7216	75.3229	90.9661	86.5464	79.3533	69.6895	0	0	0	0	0	0	0	0	0	0	0	0	0	0	0	0	228.073	225.342	218.405	218.287
sp|Q7Z5H3-2|RHG22_HUMAN	sp	Q7Z5H3-2	HUMAN	ARHGAP22	Isoform 2 of Rho GTPase-activating protein 22	1	1	1	0	3	8	3	2	232.481	238.238	249.764	225.525	209.649	224.832	232.126	238.37	223.132	223.432	223.041	214.206	218.922	248.908	241.334	236.163	41.0869	65.8539	50.9742	41.3019	50.3024	56.1168	54.4181	47.732	45.3079	51.7013	40.8401	48.3491	45.9521	50.0042	48.5335	40.9937	336.977	356.851	378.212	389.184
sp|Q9P227|RHG23_HUMAN	sp	Q9P227	HUMAN	ARHGAP23	Rho GTPase-activating protein 23	1	3	1	0	5	6	8	11	119.829	113.117	119.054	110.377	90.1465	92.6242	114.691	108.346	107.171	101.253	95.1737	122.934	127.524	109.131	113.272	101.584	177.402	149.103	141.32	135.94	133.003	109.014	171.84	153.805	135.017	115.889	119.007	178.483	185.44	172.99	181.82	162.625	292.463	271.934	283.776	250.956
sp|Q8N264|RHG24_HUMAN	sp	Q8N264	HUMAN	ARHGAP24	Rho GTPase-activating protein 24	6	7	1	0	14	16	12	10	304.34	309.895	312.238	268.983	251.127	254.903	305.704	305.215	321.993	320.062	322.58	339.871	301.458	301.315	282.008	323.275	365.402	533.016	402.938	336.305	329.201	340.754	406.426	520.578	372.296	382.402	370.548	406.224	394.585	379.92	385.692	369.48	1824.58	1752.87	1777.13	1906.05
sp|Q9UNA1|RHG26_HUMAN	sp	Q9UNA1	HUMAN	ARHGAP26	Rho GTPase-activating protein 26	1	1	1	0	5	4	3	0	26.0571	17.3629	17.4357	19.1666	22.183	21.2735	16.1474	13.3145	12.4453	22.0628	20.6454	26.4373	20.0463	21.3133	19.8635	28.2008	23.5049	34.6575	27.5243	32.5626	24.708	34.183	32.1131	29.3291	29.2379	25.8108	23.903	28.7514	29.6716	31.6501	30.5035	32.1313	754.719	568.907	732.556	679.842
sp|Q52LW3|RHG29_HUMAN	sp	Q52LW3	HUMAN	ARHGAP29	Rho GTPase-activating protein 29	14	16	1	0	12	18	19	17	926.946	945.014	857.097	813.479	774.583	807.207	925.532	868.068	818.699	858.175	770.724	970.248	891.904	694.81	523.967	514.999	1242.13	1200.92	1202.31	1219.52	1196.25	1104.24	1332.31	1245.09	1244.23	1171.36	1070.65	1288.01	1267.68	1251.05	1187.55	1027.09	1866.11	1779.91	1791.3	1722.48
sp|Q2M1Z3|RHG31_HUMAN	sp	Q2M1Z3	HUMAN	ARHGAP31	Rho GTPase-activating protein 31	2	2	1	0	10	11	5	11	105.342	132.901	117.333	95.4991	109.294	95.0961	116.704	105.24	105.489	98.3036	87.574	133.263	109.354	111.288	103.571	96.053	82.0966	69.6136	55.9066	54.804	49.8035	51.473	71.7374	59.0601	54.8907	58.5703	52.2593	68.0649	75.5843	78.6111	71.5175	63.2174	1412.7	1487.68	1484.4	1516.5
sp|A7KAX9|RHG32_HUMAN	sp	A7KAX9	HUMAN	ARHGAP32	Rho GTPase-activating protein 32	1	1	1	0	0	1	0	2	41.1091	43.9559	39.4844	47.2904	48.216	41.9139	43.0633	38.6997	44.7298	41.0065	40.721	50.4113	47.4913	45.3559	44.5147	35.4541	23.1094	14.9785	16.1659	14.5489	13.692	14.0713	17.661	20.0765	19.7744	15.3183	14.3303	22.8788	23.2166	15.3771	21.9509	21.4055	0	0	0	0
sp|Q9NRY4|RHG35_HUMAN	sp	Q9NRY4	HUMAN	ARHGAP35	Rho GTPase-activating protein 35	38	35	1	0	40	46	37	33	2893.94	2806.38	2729.41	2815.75	2655.21	2772.22	2977.34	2789.09	2733.7	2663.06	2635.77	2860.42	2838.22	2863.43	2802.46	2800.68	2501.87	2458.75	2486.68	2485.18	2408.63	2496.09	2566.32	2455.77	2420.99	2395.61	2382.35	2552.29	2528.92	2484.28	2504.91	2174.09	8387.32	8070.58	7972.08	7811.12
sp|Q9C0H5-2|RHG39_HUMAN	sp	Q9C0H5-2	HUMAN	ARHGAP39	Isoform 2 of Rho GTPase-activating protein 39	1	2	1	0	4	1	0	1	29.846	32.9474	31.7351	34.4632	34.9095	31.2108	38.1658	40.1142	41.6285	35.2263	32.0321	38.2408	45.2958	41.6689	38.7093	39.9853	145.018	136.89	146.244	142.972	144.216	131.265	144.184	141.109	136.41	138.232	129.006	144.497	154.176	155.048	148.634	158.049	533.826	506.652	548.438	450.377
sp|A6NI28|RHG42_HUMAN	sp	A6NI28	HUMAN	ARHGAP42	Rho GTPase-activating protein 42	2	1	1	0	3	3	0	0	122.554	126.088	121.643	118.953	101.159	106.124	135.905	114.456	113.425	110.674	119.215	122.093	118.386	110.242	107.204	114.068	24.678	20.5983	19.3777	21.0567	19.96	20.5857	25.89	19.9106	19.7825	23.4787	18.8794	25.6806	17.6799	20.3281	19.9741	25.8624	1086.9	773.783	721.887	1044.47
sp|Q13017|RHG05_HUMAN	sp	Q13017	HUMAN	ARHGAP5	Rho GTPase-activating protein 5	7	12	1	0	33	23	18	26	587.813	553.978	548.593	524.857	513.044	537.186	543.395	570.735	543.878	531.78	524.982	585.082	567.033	531.861	552.525	508.95	750.525	680.369	714.245	683.128	674.456	687.761	693.872	676.197	690.361	695.466	696.057	734.349	722.967	710.302	771.659	725.499	4377.91	4519.53	4047.97	4338.03
sp|P52565|GDIR1_HUMAN	sp	P52565	HUMAN	ARHGDIA	Rho GDP-dissociation inhibitor 1	43	37	1	0	43	36	31	29	4887.95	4763.55	4484.68	4628.48	4744.08	4506.06	4708.21	4675.86	4494.88	4516.01	4435.53	4827.1	4866.57	5005.64	5377.11	5298.37	3193.27	2955.33	2872.08	2967.76	3139.27	3037.63	2947.97	2966.29	3100.26	2853.73	2735.82	3064.54	2996	3061.29	3069.82	3023.55	7280.01	6907.55	6964.66	6788.19
sp|P52566|GDIR2_HUMAN	sp	P52566	HUMAN	ARHGDIB	Rho GDP-dissociation inhibitor 2	1	0	0	1	10	5	5	6	25.4787	35.0401	24.0602	28.7973	23.2535	27.5311	26.1634	30.9138	22.7647	25.3869	29.9335	30.3454	26.9044	26.9009	23.5479	29.0351	0	0	0	0	0	0	0	0	0	0	0	0	0	0	0	0	1983.61	2021.55	1868.98	1994.67
sp|Q92888-3|ARHG1_HUMAN	sp	Q92888-3	HUMAN	ARHGEF1	Isoform 3 of Rho guanine nucleotide exchange factor 1	8	11	1	0	4	6	6	5	773.158	738.865	745.148	699.392	668.178	728.035	722.497	764.115	701.825	708.373	713.646	785.073	764.097	790.494	749.487	779.431	810.019	712.834	803.476	780.289	760.545	823.365	796.688	792.361	749.93	796.876	783.891	793.118	802.589	807.064	823.369	827.904	556.464	587.681	522.56	542.146
sp|Q92888-4|ARHG1_HUMAN	sp	Q92888-4	HUMAN	ARHGEF1	Isoform 4 of Rho guanine nucleotide exchange factor 1	30	35	1	0	26	25	23	23	2294.39	2294.33	2168.99	2144.64	2139.99	2163.03	2247.87	2162.98	2097.12	2182.49	2136.76	2267.06	2311.64	2332.65	2393.7	2313.22	2279.92	2213.24	2237.72	2146.67	2116.56	2292.18	2277.34	2159.06	2140.24	2175.72	2210.99	2308.24	2299.07	2286.04	2312.45	2289.68	4177	4297.73	4153.76	3965.47
sp|O15013|ARHGA_HUMAN	sp	O15013	HUMAN	ARHGEF10	Rho guanine nucleotide exchange factor 10	6	12	1	0	21	25	22	13	674.651	694.643	700.175	659.443	610.871	627.129	660.682	679.05	672.869	553.984	623.271	683.188	741.08	663.357	644.855	560.701	933.151	738.625	818.534	810.028	745.133	707.427	798.07	765.243	801.817	772.308	814.848	823.377	837.218	783.649	869.006	761.726	3380.16	3313.88	2764.44	3014.14
sp|Q9HCE6|ARGAL_HUMAN	sp	Q9HCE6	HUMAN	ARHGEF10L	Rho guanine nucleotide exchange factor 10-like protein	3	0	0	1	5	1	3	5	382.952	361.414	389.806	384.735	386.86	382.819	389.516	358.959	358.81	361.129	358.381	412.753	379.166	421.82	403.64	373.757	0	0	0	0	0	0	0	0	0	0	0	0	0	0	0	0	810.444	875.856	801.873	784.599
sp|O15085-2|ARHGB_HUMAN	sp	O15085-2	HUMAN	ARHGEF11	Isoform 2 of Rho guanine nucleotide exchange factor 11	8	3	1	0	9	13	8	10	623.184	653.344	624.874	624.218	617.639	599.836	661.021	625.344	619.15	614.025	583.374	662.987	639.316	661.985	627.458	636.174	182.73	173.814	151.061	169.775	165.955	193.887	170.55	156.617	170.469	168.727	178.82	159.031	171.729	173.33	187.72	177.936	1783.98	1732.22	1678.98	1736.22
sp|Q9NZN5|ARHGC_HUMAN	sp	Q9NZN5	HUMAN	ARHGEF12	Rho guanine nucleotide exchange factor 12	11	15	1	0	24	19	28	24	1354.8	1347.62	1254.05	1178.95	989.607	1051.13	1331.52	1249.28	1249.97	1229.56	1197.86	1386.07	1397.34	1388.86	1295.98	1255.23	830.91	766.567	724.424	760.202	695.528	680.083	785.802	762.602	792.589	740.799	712.571	810.423	814.468	813.194	800.077	761.17	3366.08	3659.76	3411.62	3420.22
sp|Q96PE2|ARHGH_HUMAN	sp	Q96PE2	HUMAN	ARHGEF17	Rho guanine nucleotide exchange factor 17	12	9	1	0	38	33	20	28	1857.79	1821.15	1824.51	1747.99	1789.94	1792.01	1868.62	1818.06	1722.92	1811.19	1784.36	1901.99	1802.37	1897.67	1882.25	1793.79	801.742	863.151	776.439	769.69	735.505	852.411	798.636	795.019	796.317	756.658	801.806	820.127	844.729	828.167	832.082	806.178	4549.79	4664.55	4532.21	4440.82
sp|Q6ZSZ5|ARHGI_HUMAN	sp	Q6ZSZ5	HUMAN	ARHGEF18	Rho guanine nucleotide exchange factor 18	2	10	1	0	14	14	17	25	103.518	84.9108	93.4459	94.0406	79.0428	98.1795	103.792	90.5837	96.9605	90.709	87.0058	99.6945	98.3375	101.355	90.8513	111.094	695.941	676.71	653.167	626.015	605.999	587.739	657.323	616.259	616.627	626.714	591.253	704.051	708.085	721.062	709.553	720.529	1733.41	1849.6	2125.2	1777.2
sp|Q92974|ARHG2_HUMAN	sp	Q92974	HUMAN	ARHGEF2	Rho guanine nucleotide exchange factor 2	29	45	1	0	52	55	63	58	1966.05	1780.78	1731.79	1621.05	1612.35	1761.36	1729.81	1663.61	1628.45	1713.48	1865.47	1790.15	1793.2	1462.03	1393.82	1556.73	2992.06	2720.68	2820.66	2720.34	2679.23	2730.11	2895.26	2789.86	2814.01	2965.17	3000.12	2961.73	2854.06	2961.3	3060.74	2640.81	6415.13	6462.99	6485.31	5942.87
sp|Q8N1W1-6|ARG28_HUMAN	sp	Q8N1W1-6	HUMAN	ARHGEF28	Isoform 6 of Rho guanine nucleotide exchange factor 28	0	3	0	1	14	7	5	5	0	0	0	0	0	0	0	0	0	0	0	0	0	0	0	0	123.725	136.763	141.945	145.154	123.263	116.242	142.962	131.681	121.877	121.338	112.081	129.039	131.364	130.662	123.86	128.174	1598.99	1548.17	1537.98	1605.34
sp|Q8TER5|ARH40_HUMAN	sp	Q8TER5	HUMAN	ARHGEF40	Rho guanine nucleotide exchange factor 40	10	9	1	0	15	16	9	13	815.203	836.519	752.987	771.8	728.856	665.324	803.909	785.759	724.439	703.473	555.698	828.384	795.029	810.292	686.661	591.414	444.477	375.707	401.375	378.196	342.611	343.081	422.245	396.737	393.928	352.866	331.224	439.777	444.013	445.852	472.002	428.759	2037.18	1975.66	1907.51	1915.54
sp|Q15052|ARHG6_HUMAN	sp	Q15052	HUMAN	ARHGEF6	Rho guanine nucleotide exchange factor 6	4	3	1	0	6	5	2	9	640.53	652.421	669.353	645.279	609.374	647.032	696.773	652.369	653.988	697.988	676.963	686.181	663.538	687.561	688.759	745.317	692.532	771.969	682.426	638.396	676.469	727.977	684.881	717.861	658.479	691.823	726.233	688.483	729.681	706.964	673.218	706.611	1343.36	1447.1	1344.39	1387.4
sp|Q14155|ARHG7_HUMAN	sp	Q14155	HUMAN	ARHGEF7	Rho guanine nucleotide exchange factor 7	11	7	1	0	19	13	16	18	820.705	885.784	897.009	891.991	839.729	807.864	901.636	894.053	884.545	851.746	899.144	951.863	929.402	944.709	924.839	948.225	904.192	1082.53	888.024	842.188	849.382	974.636	829.765	990.561	883.2	912.877	1030.71	860.305	845.758	874.961	943.448	951.308	3331.72	3623.37	3305.16	3347.24
sp|Q14155-5|ARHG7_HUMAN	sp	Q14155-5	HUMAN	ARHGEF7	Isoform 5 of Rho guanine nucleotide exchange factor 7	3	5	1	0	7	6	5	5	262.608	280.61	251.177	260.185	251.6	283.181	263.757	263.826	273.496	275.639	263.724	281.095	262.891	262.341	278.916	297.942	476.923	465.429	432.115	414.111	454.015	496.438	454.278	408.222	421.05	398.39	464.559	415.832	446.29	458.152	472.928	461.858	1025.47	876.408	867.72	851.928
sp|O14497|ARI1A_HUMAN	sp	O14497	HUMAN	ARID1A	AT-rich interactive domain-containing protein 1A	22	22	1	0	24	40	32	20	1275.99	1193.11	1246.04	1211.53	1122.96	1150.78	1201.4	1152.91	1143.85	1161.88	1017.94	1321.45	1223.88	1229.52	1163.91	1049.51	1330.58	1418.59	1353.89	1342.75	1281.79	1118.65	1363.53	1290.23	1238.02	1283.77	1132.61	1356.89	1395.99	1241.49	1259.57	1036.5	4897.55	5037.26	4556.19	4619.42
sp|Q8NFD5-3|ARI1B_HUMAN	sp	Q8NFD5-3	HUMAN	ARID1B	Isoform 3 of AT-rich interactive domain-containing protein 1B	11	11	1	0	17	19	17	17	863.298	950.418	893.234	881.123	849.577	795.866	959.494	941.575	818.425	816.077	769.571	864.21	845.493	796.389	777.242	750.301	516.263	521.856	538.907	511.78	484.124	490.489	544.79	504.199	503.121	504.199	503.045	542.202	527.964	490.435	515.737	488.303	2164.9	2262.17	2280.04	2240.26
sp|Q68CP9|ARID2_HUMAN	sp	Q68CP9	HUMAN	ARID2	AT-rich interactive domain-containing protein 2	4	5	1	0	9	14	8	12	205.524	228.705	208.709	203.839	214.588	211.838	238.211	231.955	217.355	219.891	211.065	234.988	222.264	203.897	187.327	208.273	337.096	353.982	328.652	357.46	352.232	358.054	355.99	350.918	318.863	356.618	336.443	331.113	365.882	339.848	329.566	265.608	1299.39	1431.44	1399.58	1343.45
sp|Q99856|ARI3A_HUMAN	sp	Q99856	HUMAN	ARID3A	AT-rich interactive domain-containing protein 3A	2	0	0	1	3	5	6	6	84.4806	87.6237	81.687	74.5194	86.1858	66.5076	79.6761	84.9262	74.1408	70.3089	59.3732	84.6052	90.5138	77.9305	74.1115	86.9125	0	0	0	0	0	0	0	0	0	0	0	0	0	0	0	0	463.1	394.421	375.696	405.291
sp|P29374|ARI4A_HUMAN	sp	P29374	HUMAN	ARID4A	AT-rich interactive domain-containing protein 4A	1	4	1	0	3	8	5	7	46.8609	38.5004	37.5466	43.8188	34.3793	37.677	46.5828	48.453	43.0301	41.4854	45.2492	45.102	50.3608	42.6091	45.8934	38.5027	148.601	165.109	179.834	178.735	165.78	159.426	176.544	180.937	186.821	165.741	185.756	146.953	155.578	141.81	125.954	110.986	334.418	339.709	343.444	289.353
sp|Q4LE39|ARI4B_HUMAN	sp	Q4LE39	HUMAN	ARID4B	AT-rich interactive domain-containing protein 4B	4	2	1	0	13	6	13	19	205.819	205.493	204.476	207.845	199.651	190.954	209.742	197.379	210.383	243.449	258.091	205.852	195.962	193.824	227.008	249.584	59.2675	61.0224	63.6902	64.594	67.056	62.2908	61.8416	67.1145	66.5382	62.8289	78.3238	62.9631	75.7808	68.77	64.0977	74.9352	2014.68	2111.13	2163.82	1964.62
sp|Q14865|ARI5B_HUMAN	sp	Q14865	HUMAN	ARID5B	AT-rich interactive domain-containing protein 5B	1	1	1	0	9	9	6	11	211.538	211.905	176.873	208.987	183.502	234.613	213.055	198.276	206.132	198.643	187.486	207.479	205.624	206.858	213.244	219.159	49.8237	15.6436	14.654	14.2793	12.076	5.70506	24.3388	14.4648	8.5368	7.61256	7.27718	44.1707	42.0945	35.6372	32.7269	28.7822	1452.38	1394.09	1389.55	1380.37
sp|Q9Y4X5|ARI1_HUMAN	sp	Q9Y4X5	HUMAN	ARIH1	E3 ubiquitin-protein ligase ARIH1	13	10	1	0	20	15	14	21	862.454	946.535	929.037	901.002	856.019	824.413	951.068	942.464	906.549	891.72	992.723	976.352	946.582	925.751	809.418	968.309	908.416	895.134	967.401	917.776	901.357	870.711	951.671	931.592	916.137	903.512	908.199	971.866	966.285	980.337	928.008	958.964	3886.67	3689.78	3808.51	3379.33
sp|O95376|ARI2_HUMAN	sp	O95376	HUMAN	ARIH2	E3 ubiquitin-protein ligase ARIH2	3	6	1	0	4	12	10	9	138.86	142.339	164.532	156.502	152.975	149.51	148.601	158.637	144.076	155.752	136.747	156.638	146.215	140.701	165.215	156.902	339.655	340.319	329.09	327.666	346.046	400.219	333.395	342.178	327.063	324.42	317.567	339.481	360.007	351.822	368.405	347.945	585.521	529.935	591.349	569.409
sp|P40616|ARL1_HUMAN	sp	P40616	HUMAN	ARL1	ADP-ribosylation factor-like protein 1	15	12	1	0	7	13	13	7	1748.89	1644.41	1804.04	1668.08	1646.6	1729.35	1657.04	1887.23	1545.46	1760.97	1779.74	1704.73	1806.72	2174.12	1795.19	1704.22	1297.7	1241.79	1217.15	1271.5	1156.59	1251.18	1186.74	1238.25	1273.93	1211.13	1450.73	1254.84	1272.79	1412.95	1252.68	1354.09	646.09	686.194	575.595	599.056
sp|Q8N8R7|AL14E_HUMAN	sp	Q8N8R7	HUMAN	ARL14EP	ARL14 effector protein	1	1	1	0	3	3	3	3	48.0266	45.0492	42.6408	42.3332	28.5768	40.1236	45.791	42.35	37.8113	43.0925	40.4673	37.8008	36.9413	34.36	47.2523	37.1782	34.5925	24.7448	26.4129	32.2963	24.9271	29.578	31.6475	36.7971	39.8188	36.0566	38.5892	28.437	39.8366	33.6225	30.6611	33.4042	387.253	333.591	318.759	308.158
sp|Q9NXU5|ARL15_HUMAN	sp	Q9NXU5	HUMAN	ARL15	ADP-ribosylation factor-like protein 15	3	4	1	0	5	6	4	3	106.216	100.417	99.0338	111.666	95.9086	119.748	93.2344	109.192	118.195	112.36	140.055	88.8986	85.4246	99.7492	93.1666	129.32	156.072	225.381	201.863	183.29	167.489	159.336	176.331	162.635	174.028	183.983	196.282	167.007	176.635	167.59	163.519	203.908	1033.91	926.265	1014.2	955.565
sp|P36404|ARL2_HUMAN	sp	P36404	HUMAN	ARL2	ADP-ribosylation factor-like protein 2	15	15	1	0	3	6	5	4	2727.07	2500.18	2333.02	2249.91	2186.31	2185.37	2543.5	2378.2	2217.09	2136.23	2120.31	2575.74	2458.18	2253.2	2099.84	2165.46	2545.73	2375.64	2355.58	2187.84	2148.75	2090.82	2392.9	2317.74	2143.28	2152.92	2101.25	2486.07	2536.33	2585.43	2377.8	2159.73	469.035	412.803	366.159	420.719
sp|Q9Y2Y0|AR2BP_HUMAN	sp	Q9Y2Y0	HUMAN	ARL2BP	ADP-ribosylation factor-like protein 2-binding protein	4	1	1	0	3	3	3	4	220.372	196.34	188.675	194.863	179.84	166.596	207.081	191.362	193.165	185.019	202.324	185.461	189.476	161.825	150.817	169.723	28.7459	16.0967	23.8894	23.0499	19.4976	18.3656	20.8993	21.8552	21.992	25.6018	23.6799	20.8371	24.23	27.2533	20.0954	17.9548	316.253	432.746	410.597	426.839
sp|P36405|ARL3_HUMAN	sp	P36405	HUMAN	ARL3	ADP-ribosylation factor-like protein 3	32	21	1	0	10	9	11	10	4910.81	4758.21	4626.56	4714.18	4620.51	4664.43	4707.17	4682.41	4756.24	4733.95	4957.72	4785.13	4779.16	4779.18	4593.07	4742.12	2561.36	2431.63	2415.64	2430.09	2395.24	2440.65	2442.21	2408.11	2342.54	2367.49	2266	2508.8	2464.7	2467.06	2405.27	2279.05	1852.25	1963.07	2021.85	1956.26
sp|Q96KC2|ARL5B_HUMAN	sp	Q96KC2	HUMAN	ARL5B	ADP-ribosylation factor-like protein 5B	1	0	0	1	2	0	0	0	192.076	214.625	208.177	206.316	192.493	194.595	204.787	254.39	310.044	358.177	398.85	203.391	231.761	215.163	232.343	270.66	0	0	0	0	0	0	0	0	0	0	0	0	0	0	0	0	350.825	329.855	294.066	321.376
sp|Q9H0F7-2|ARL6_HUMAN	sp	Q9H0F7-2	HUMAN	ARL6	Isoform 2 of ADP-ribosylation factor-like protein 6	3	0	0	1	2	3	5	1	478.821	469.099	449.198	446.013	442.869	458.248	489.17	461.418	467.38	465.305	469.87	461.614	463.259	468.47	448.06	446.561	0	0	0	0	0	0	0	0	0	0	0	0	0	0	0	0	195.511	216.84	188.831	195.301
sp|Q15041|AR6P1_HUMAN	sp	Q15041	HUMAN	ARL6IP1	ADP-ribosylation factor-like protein 6-interacting protein 1	3	3	1	0	1	2	2	4	314.268	437.232	405.038	385.068	397.401	291.154	391.301	421.192	377.009	325.761	279.674	290.852	360.666	379.945	315.454	306.942	199.601	267.395	216.184	219.489	217.611	232.296	246.733	243.695	246.117	233.545	200.623	222.685	214.27	219.903	195.151	209.65	88.6883	142.989	133.829	113.078
sp|Q66PJ3-2|AR6P4_HUMAN	sp	Q66PJ3-2	HUMAN	ARL6IP4	Isoform 2 of ADP-ribosylation factor-like protein 6-interacting protein 4	2	1	1	0	6	9	9	8	314.408	302.585	244.636	244.08	210.193	227.906	302.093	282.184	258.434	230.298	236.781	296.489	314.791	310.702	250.92	281.956	146.002	127.075	111.84	108.532	91.0078	112.624	121.008	120.553	97.9937	126.349	119.272	147.304	135.578	151.224	149.841	135.793	648.037	699.943	731.675	676.849
sp|O75915|PRAF3_HUMAN	sp	O75915	HUMAN	ARL6IP5	PRA1 family protein 3	9	4	1	0	5	9	6	10	573.872	533.52	574.505	572.622	596.082	658.457	545.879	587.113	607.916	567.97	653.276	476.468	548.2	589.818	553.857	565.819	372.003	337.805	373.825	380.64	357.562	403.692	391.365	380.229	347.921	390.083	391.507	398.799	383.769	383.361	370.595	367.927	806.795	820.622	752.38	744.379
sp|Q8N6S5|AR6P6_HUMAN	sp	Q8N6S5	HUMAN	ARL6IP6	ADP-ribosylation factor-like protein 6-interacting protein 6	0	2	0	1	1	4	3	4	0	0	0	0	0	0	0	0	0	0	0	0	0	0	0	0	46.5978	50.7542	39.3819	41.2471	34.6988	34.5007	48.2356	43.5767	35.5745	34.1469	31.8299	46.4214	51.2187	46.5287	48.6956	49.5021	89.5548	66.1277	77.7082	71.4503
sp|Q96BM9|ARL8A_HUMAN	sp	Q96BM9	HUMAN	ARL8A	ADP-ribosylation factor-like protein 8A	2	3	1	0	2	3	1	2	70.8551	64.3331	61.7653	58.9817	59.1776	55.4862	58.7372	69.467	63.9206	54.1143	56.4541	65.2061	68.0743	62.9662	61.0414	67.7279	282.691	258.887	257.367	260.806	242.202	224.755	282.24	260.098	250.394	266.81	269.09	271.616	264.135	256.063	264.243	285.974	317.169	295.489	303.5	303.581
sp|Q9NVJ2|ARL8B_HUMAN	sp	Q9NVJ2	HUMAN	ARL8B	ADP-ribosylation factor-like protein 8B	24	27	1	0	14	10	17	17	1737.83	1631.14	1603.78	1604.19	1484.85	1630.92	1632.49	1613.04	1582.56	1536.39	1695.7	1559.57	1676.74	1688.36	1695.93	1906.59	2070.78	1728.46	2047.59	2031	1921.79	1915.14	1963.95	1960.31	1956.07	2080.72	2179.65	1968.45	1960.38	2023.53	2049.35	2213.48	2914.91	2507.31	2055.14	2280.42
sp|Q9NVT9|ARMC1_HUMAN	sp	Q9NVT9	HUMAN	ARMC1	Armadillo repeat-containing protein 1	4	9	1	0	8	6	5	6	316.815	333.858	325.673	293.429	298.526	285.345	354.798	326.95	322.382	320.217	310.994	354.333	339.688	321.165	318.368	253.672	637.955	488.099	686.538	606.137	583.364	503.146	676.286	612.515	654.263	608.266	551.424	735.313	622.803	601.391	641.39	523.262	1530.19	1571.8	1807.1	1663.46
sp|Q8N2F6|ARM10_HUMAN	sp	Q8N2F6	HUMAN	ARMC10	Armadillo repeat-containing protein 10	3	2	1	0	7	3	3	3	216.6	204.642	222.571	211.492	214.296	211.668	213.022	220.058	229.615	235.032	228.33	193.73	200.815	224.093	225.503	225.035	49.191	52.9581	51.4908	61.6664	55.9162	53.2103	52.0233	47.6934	45.8613	57.3942	65.7326	47.8239	64.0508	47.3874	64.9291	55.6133	991.114	916.281	913.939	950.439
sp|Q6NXE6|ARMC6_HUMAN	sp	Q6NXE6	HUMAN	ARMC6	Armadillo repeat-containing protein 6	10	10	1	0	8	11	14	5	1122.3	1103.2	1008.54	926.73	862.42	850.335	1078.97	1052.37	966.945	863.455	823.564	1123.88	1116.54	1069.61	1021.33	962.684	741.392	765.17	710.101	661.86	630.285	574.415	764.403	729.439	665.658	610.711	524.294	739.147	746.449	750.64	724.934	635.553	1571.26	1817.63	1620.85	1664.4
sp|Q8IUR7|ARMC8_HUMAN	sp	Q8IUR7	HUMAN	ARMC8	Armadillo repeat-containing protein 8	4	5	1	0	7	13	10	16	427.293	436.808	421.32	412.35	422.975	442.274	438.729	404.344	439.154	449.374	413.414	476.662	448.45	458.184	444.11	447.265	259.097	205.996	251.81	243.762	230.105	191.875	255.896	226.129	237.325	270.132	217.906	292.53	236.171	224.489	272.058	232.344	1099.84	980.945	914.604	1022.55
sp|Q7Z3E5|ARMC9_HUMAN	sp	Q7Z3E5	HUMAN	ARMC9	LisH domain-containing protein ARMC9	3	15	1	0	7	4	5	7	488.517	364.338	372.909	344.855	343.273	370.294	380.168	348.967	350.656	354.776	369.365	437.397	404.6	376.111	342.52	391.926	1371.34	1115.65	1098.81	1055.11	971.899	1221.9	1099.64	1084.58	1048.92	1026.26	1102.22	1209.94	1249.51	1295.02	1335.27	1126.62	1110.81	906.484	914.697	873.897
sp|Q9P291|ARMX1_HUMAN	sp	Q9P291	HUMAN	ARMCX1	Armadillo repeat-containing X-linked protein 1	5	13	1	0	14	7	6	8	539.598	531.716	484.353	456.173	360.632	377.214	510.304	504.609	457.681	426.893	440.013	506.27	514.022	454.689	415.113	472.903	1331.14	1249.21	1245.14	1082.4	934.161	789.279	1252.96	1112.87	1082.12	1046.21	1062.38	1362.38	1324.51	1300.81	1532.98	1609.4	2406.09	2434.27	2605	2537.98
sp|Q7L311|ARMX2_HUMAN	sp	Q7L311	HUMAN	ARMCX2	Armadillo repeat-containing X-linked protein 2	5	4	1	0	18	10	4	9	409.406	369.717	380.224	320.122	260.494	264.775	377.949	339.999	327.084	317.483	338.592	392.035	353.287	318.488	239.434	291.169	309.952	341.201	328.368	303.777	276.929	209.857	342.705	324.351	279.859	291.261	295.519	347.508	338.879	338.718	338.431	335.569	2257.92	2283.32	2632.44	2321.1
sp|Q9UH62|ARMX3_HUMAN	sp	Q9UH62	HUMAN	ARMCX3	Armadillo repeat-containing X-linked protein 3	16	20	1	0	20	15	16	23	1288.82	1284.3	1216.13	1232.22	1196.21	1243.7	1243.4	1207.18	1215.74	1196.88	1284.67	1155.92	1236	1296.08	1266.76	1313.01	1371.55	1305.49	1246.49	1325.69	1240.65	1173.52	1238.71	1244.8	1289.09	1277.51	1347.49	1236.64	1369.72	1357.3	1375.61	1556.35	2238.28	2249.22	2251.07	2264.24
sp|Q6P1M9|ARMX5_HUMAN	sp	Q6P1M9	HUMAN	ARMCX5	Armadillo repeat-containing X-linked protein 5	1	0	0	1	0	0	0	0	88.0875	62.2526	56.6707	32.6907	25.0084	26.368	53.7705	48.2998	46.0311	61.7684	58.9975	71.7813	72.8391	50.7418	54.7066	48.5108	0	0	0	0	0	0	0	0	0	0	0	0	0	0	0	0	0	0	0	0
sp|Q9H993|ARMT1_HUMAN	sp	Q9H993	HUMAN	ARMT1	Protein-glutamate O-methyltransferase	26	19	1	0	11	13	12	12	2074.42	2038.37	2026.17	1967.07	1946.83	1840.02	1964.12	2043.9	1953.6	1950.93	2053.29	2061.35	2056.99	2203.62	2166.12	2165.16	1752.78	1583.12	1704.88	1697.16	1662.24	1478.38	1621.53	1675.83	1678.46	1613.1	1629.24	1674.75	1691.83	1711.01	1679.86	1638.89	2903.24	3092.52	3005.03	2961.43
sp|P27540|ARNT_HUMAN	sp	P27540	HUMAN	ARNT	Aryl hydrocarbon receptor nuclear translocator	2	5	1	0	5	11	6	6	36.6619	39.1437	37.045	36.2592	27.2988	25.919	38.729	31.4183	33.8322	31.4085	39.9308	45.5573	39.4756	37.2083	35.0026	31.5868	107.358	96.2751	115.055	106.93	97.5409	80.4524	111.047	107.575	102.405	109.07	109.318	121.444	113.593	110.521	106.623	91.3033	572.737	584.702	588.74	587.36
sp|O00327|BMAL1_HUMAN	sp	O00327	HUMAN	ARNTL	Aryl hydrocarbon receptor nuclear translocator-like protein 1	1	1	1	0	1	1	2	3	47.4399	46.2426	36.8806	48.2307	41.5315	38.6201	49.4437	41.4265	46.2439	42.3646	39.8887	48.2528	44.22	43.5971	40.4727	34.2284	71.5783	77.6613	70.609	69.4191	64.8557	62.7383	60.4612	69.3744	62.92	70.9599	59.0131	60.2629	68.8936	63.7134	63.5493	72.7258	85.9792	84.7214	87.4929	93.5081
sp|Q92747|ARC1A_HUMAN	sp	Q92747	HUMAN	ARPC1A	Actin-related protein 2/3 complex subunit 1A	14	9	1	0	28	27	16	18	1054.87	1021.86	1081.02	1037.2	1030.36	983.185	1057	1063.97	1049.67	1146.05	1026.13	1028.11	1120.16	1143.21	1210.43	1105.79	740.226	674.765	740.712	726.693	774.135	706.112	754.927	758.832	718.309	742.889	727.392	803.523	752.866	769.775	737.682	718.282	6273.06	5759.03	5698.32	6104.75
sp|O15143|ARC1B_HUMAN	sp	O15143	HUMAN	ARPC1B	Actin-related protein 2/3 complex subunit 1B	45	44	1	0	43	28	27	32	3605.82	3574.27	3507.35	3503.03	3672.33	3456.82	3595.05	3478.34	3609.48	3564.98	3352.43	3577.13	3584.69	3823.91	4084.68	3746.54	2755.53	2335.98	2406.37	2460	2558.51	2699.58	2400.53	2404.28	2478.17	2546.13	2543.99	2513.01	2556.22	2847.9	2785.67	2799.55	5317.77	5223.01	4917.95	5130.97
sp|O15144|ARPC2_HUMAN	sp	O15144	HUMAN	ARPC2	Actin-related protein 2/3 complex subunit 2	65	54	1	0	48	31	23	34	9490.56	9456.84	9305.83	9359.52	9682.48	9176.35	9473.94	9151.94	8934.71	9170.32	8956.8	9690.87	9714.54	10201.1	10029.6	10301.7	6940.45	6229.44	6444.09	6603.49	6826.1	6969.36	6640.41	6551.16	6532.43	6598.83	6583.18	6698.59	6644.1	7165.88	6840.72	7144.26	6974.72	7033.29	7710.3	6521.39
sp|O15145|ARPC3_HUMAN	sp	O15145	HUMAN	ARPC3	Actin-related protein 2/3 complex subunit 3	43	36	1	0	35	43	42	29	4266.89	4180.53	4098.87	4155.09	4094.95	4083.29	4233.26	4255.97	4091.98	4228.29	4154.8	4285.83	4313.41	4445.19	4639.48	4644.57	2575.18	2215.67	2543.17	2527.08	2510.2	2508.41	2420.01	2510.36	2576.32	2460.54	2435.35	2542.64	2473.51	2498.32	2584.34	2500.17	9056.48	8606	8510.82	8123.04
sp|P59998-3|ARPC4_HUMAN	sp	P59998-3	HUMAN	ARPC4	Isoform 3 of Actin-related protein 2/3 complex subunit 4	40	35	1	0	14	14	14	16	3957.79	4090.92	4024.04	4019.43	4197.19	3865.91	4111.77	4004.48	3942.84	3939.06	3827.63	4252.38	4293.19	4216.52	4302.92	4224.29	3314.01	2970.46	3091.85	3107.62	3211.89	3279.96	3257.09	3212.14	3175.77	3230.6	3115.28	3219.95	3286.49	3260.78	3313.62	3342.19	3028.12	2867.33	2865.16	2803.11
sp|O15511|ARPC5_HUMAN	sp	O15511	HUMAN	ARPC5	Actin-related protein 2/3 complex subunit 5	26	31	1	0	28	26	25	30	2737.04	2649.01	2594.93	2674	2710.61	2646.61	2567.38	2655.75	2687.76	2627.39	2624.6	2635.69	2747.8	2777.87	2944.98	2766.01	2236.43	2192.31	2086.32	2127.28	2222.38	2258.45	2138.15	2106.03	2093.62	2152.07	2156.36	2106.84	2117.93	2168.54	2238.73	2248.78	4083.94	3782.33	3613.23	3727.59
sp|Q9BPX5|ARP5L_HUMAN	sp	Q9BPX5	HUMAN	ARPC5L	Actin-related protein 2/3 complex subunit 5-like protein	23	26	1	0	9	15	16	8	1369.44	1286.44	1304.55	1320.64	1290.05	1280.41	1296.22	1329.05	1384.77	1359.83	1346.67	1259.19	1365.5	1383.39	1552.66	1448.18	1479.67	1391.95	1483.98	1461.81	1468.51	1477.1	1403.38	1439.71	1435.66	1421.91	1456.2	1477.18	1449.23	1437.44	1505.22	1388.57	1423	1398.21	1352.84	1475.71
sp|Q7Z6K5-2|ARPIN_HUMAN	sp	Q7Z6K5-2	HUMAN	ARPIN	Isoform C15orf38-AP3S2 of Arpin	7	8	1	0	8	9	13	10	658.595	615.895	580.777	579.961	575.142	541.736	599.344	583.112	575.306	589.602	558.144	628.452	638.499	603.303	637.052	564.478	313.289	290.522	256.277	302.172	281.901	306.079	285.723	284.147	288.115	274.642	264.14	266.904	282.03	280.293	303.924	285.973	1488.9	1559.55	1423.09	1483.26
sp|Q7Z6K5|ARPIN_HUMAN	sp	Q7Z6K5	HUMAN	ARPIN	Arpin	1	0	0	1	1	1	1	0	129.072	105.442	126.079	118.012	110.995	98.5169	115.69	115.729	124.809	115.45	110.765	133.464	116.732	125.753	126.643	123.599	0	0	0	0	0	0	0	0	0	0	0	0	0	0	0	0	99.3063	107.071	100.422	92.5422
sp|P56211|ARP19_HUMAN	sp	P56211	HUMAN	ARPP19	cAMP-regulated phosphoprotein 19	2	3	1	0	2	5	3	4	352.099	397.468	351.159	325.221	332.581	281.22	378.94	350.538	348.254	347.634	338.461	391.35	350.248	337.819	311.851	295.449	337.584	335.084	318.886	294.967	294.343	277.698	322.806	310.435	319.35	308.345	277.5	337.509	351.993	340.178	328.853	270.111	1384.97	1295.05	1173.61	985.309
sp|P49407-2|ARRB1_HUMAN	sp	P49407-2	HUMAN	ARRB1	Isoform 1B of Beta-arrestin-1	10	12	1	0	14	9	7	13	1318.44	1242.84	1225.84	1259.76	1210.18	1306.93	1251.6	1223.03	1275.31	1236.9	1332.93	1334.19	1351.36	1387.15	1320.9	1516.8	1086.62	743.994	896.297	911.088	869.882	1087.07	880.363	844.27	882.017	870.423	913.755	1005.28	1035.69	1007.96	1062.63	1053.16	1911.39	2022.4	1816.42	1829.93
sp|P32121-4|ARRB2_HUMAN	sp	P32121-4	HUMAN	ARRB2	Isoform 4 of Beta-arrestin-2	2	2	1	0	2	4	3	3	92.2931	83.1057	87.1083	93.1406	86.8756	112.803	89.2105	88.1288	86.8149	96.0004	96.4464	93.7155	97.9407	101.545	99.4457	106.705	144.713	125.88	150.575	138.389	145.619	154.194	155.89	155.857	139.116	148.11	139.874	134.605	148.055	151.789	142.161	121.209	631.258	540.954	557.726	532.949
sp|Q8N5I2|ARRD1_HUMAN	sp	Q8N5I2	HUMAN	ARRDC1	Arrestin domain-containing protein 1	1	0	0	1	2	1	0	2	71.4518	75.9492	76.0943	72.6295	77.7662	71.9484	71.0751	67.2156	65.1084	60.2853	66.397	77.4083	74.339	74.6808	65.0224	64.4156	0	0	0	0	0	0	0	0	0	0	0	0	0	0	0	0	682.092	633.785	602.511	596.401
sp|P15289|ARSA_HUMAN	sp	P15289	HUMAN	ARSA	Arylsulfatase A	0	1	0	1	2	3	1	5	0	0	0	0	0	0	0	0	0	0	0	0	0	0	0	0	52.0785	35.8929	36.2567	29.1871	35.7743	45.8218	37.7952	37.7625	32.8604	35.1958	44.1733	40.0028	43.1075	51.1918	43.5988	54.5745	235.758	234.799	225.958	200.446
sp|P15848|ARSB_HUMAN	sp	P15848	HUMAN	ARSB	Arylsulfatase B	5	2	1	0	15	14	9	13	562.19	527.125	548.639	500.046	414.828	479.551	535.407	506.453	460.811	450.462	422.394	572.263	540.817	542.423	520.776	467.229	296.993	263.482	248.238	235.277	250.703	237.313	253.361	231.165	233.33	229.943	228.05	269.51	282.117	260.404	273.33	240.739	2930.01	2787.52	3151.76	2856
sp|Q5FYB0|ARSJ_HUMAN	sp	Q5FYB0	HUMAN	ARSJ	Arylsulfatase J	1	0	0	1	2	0	1	1	155.808	131.922	106.818	113.298	86.6736	85.6787	143.22	132.986	118.343	117.054	105.5	140.297	157.077	148.189	132.525	146.123	0	0	0	0	0	0	0	0	0	0	0	0	0	0	0	0	451.487	454.708	345.624	422.783
sp|Q6UWY0|ARSK_HUMAN	sp	Q6UWY0	HUMAN	ARSK	Arylsulfatase K	2	2	1	0	4	3	0	0	293.385	249.481	227.993	210.156	162.856	198.214	268.321	265.742	205.14	204.584	202.978	287.024	287.989	252.082	224.926	222.468	464.584	300.192	273.498	234.547	202.39	212.68	317.002	257.522	237.489	246.115	233.271	430.36	397.67	387.244	496.897	400.073	796.645	862.661	1002.42	855.881
sp|O00192|ARVC_HUMAN	sp	O00192	HUMAN	ARVCF	Armadillo repeat protein deleted in velo-cardio-facial syndrome	0	1	0	1	1	1	1	0	0	0	0	0	0	0	0	0	0	0	0	0	0	0	0	0	16.4238	29.1881	76.6601	73.1565	122.843	68.8162	39.6967	63.4697	64.4834	68.523	73.6844	28.7616	36.3508	36.5628	31.5042	21.7756	85.272	67.4862	60.8423	75.585
sp|Q9HBK9|AS3MT_HUMAN	sp	Q9HBK9	HUMAN	AS3MT	Arsenite methyltransferase	1	1	1	0	2	2	2	4	189.094	172.944	199.009	176.402	162.564	164.592	180.843	167.267	177.249	180.875	179.729	207.848	177.55	197.557	199.31	183.274	56.3946	41.4686	54.2031	54.9609	55.3108	48.5779	60.0055	50.4659	44.0352	54.003	42.4532	60.1952	59.1143	60.5802	58.3495	43.196	183.749	164.324	273.825	201.077
sp|Q13510-2|ASAH1_HUMAN	sp	Q13510-2	HUMAN	ASAH1	Isoform 2 of Acid ceramidase	7	9	1	0	21	10	12	13	474.369	431.961	413.626	411.94	359.538	433.397	419.352	428.558	394.669	393.096	397.636	444.191	450.522	461.068	433.756	417.763	1310.33	816.293	889.027	887.728	826.756	882.191	873.405	870.49	872.369	903.959	960.444	1013.65	1049.53	1130.65	1213.93	1029.51	3828.52	3382.94	3323.01	3389.02
sp|Q9ULH1-2|ASAP1_HUMAN	sp	Q9ULH1-2	HUMAN	ASAP1	Isoform 1 of Arf-GAP with SH3 domain, ANK repeat and PH domain-containing protein 1	36	32	1	0	27	17	20	26	3429.84	3381.15	3287.19	3302.3	3282.37	3440.88	3418.9	3343.47	3301.27	3178.78	3195.97	3432.88	3425.31	3483.36	3489.67	3815.27	2683.43	2588.5	2507.57	2535.22	2512.94	2646.01	2564.84	2469.62	2437.9	2548.97	2572.49	2628.12	2699.46	2606.22	2688.51	2698.08	3187.02	3515.84	3390.23	3228.45
sp|O43150|ASAP2_HUMAN	sp	O43150	HUMAN	ASAP2	Arf-GAP with SH3 domain, ANK repeat and PH domain-containing protein 2	6	8	1	0	14	10	12	14	223.527	249.309	263.22	236.093	232.821	252.409	258.355	249.005	253.89	246.806	247.972	258.608	249.174	271.052	249.153	264.369	298.653	281.453	295.317	286.425	305.414	305.973	291.535	297.115	292.307	311.999	319.493	300.281	311.001	304.278	318.502	288.213	1796.38	1699.43	1601.13	1559.66
sp|Q8TDY4|ASAP3_HUMAN	sp	Q8TDY4	HUMAN	ASAP3	Arf-GAP with SH3 domain, ANK repeat and PH domain-containing protein 3	2	4	1	0	6	3	3	2	539.659	424.238	436.379	420.555	396.582	478.161	453.272	410.616	417.875	423.544	470.943	503.824	447.596	474.25	461.448	475.521	686.394	619.603	583.677	601.967	521.683	612.396	594.896	564.477	555.7	577	570.991	592.804	617.407	629.566	674.488	596.782	1246.44	1212.9	1143.02	1136.63
sp|Q9Y576|ASB1_HUMAN	sp	Q9Y576	HUMAN	ASB1	Ankyrin repeat and SOCS box protein 1	1	0	0	1	2	0	0	0	34.291	31.3703	18.8251	19.9963	19.7129	18.9521	22.1942	10.3586	7.34323	6.11839	8.27971	31.57	33.1054	25.5522	18.2921	18.4838	0	0	0	0	0	0	0	0	0	0	0	0	0	0	0	0	263.105	218.877	243.585	237.921
sp|Q9NWX5|ASB6_HUMAN	sp	Q9NWX5	HUMAN	ASB6	Ankyrin repeat and SOCS box protein 6	4	2	1	0	4	2	0	0	294.45	298.711	276.24	250.93	225.519	205.999	291.853	271.512	281.824	290.934	278.198	325.064	285.472	251.393	209.499	246.414	111.534	267.754	241.061	203.699	104.882	75.0344	248.989	227.6	134.312	94.9172	92.7202	275.8	254.132	180.468	123.216	98.1669	734.84	759.104	753.115	675.007
sp|Q96DX5|ASB9_HUMAN	sp	Q96DX5	HUMAN	ASB9	Ankyrin repeat and SOCS box protein 9	1	1	1	0	0	2	3	1	82.3661	66.4074	71.4504	76.6449	69.278	82.6281	71.254	64.515	72.3609	77.2281	63.2215	84.9876	65.9294	75.9204	80.0053	82.9747	53.8371	55.8837	57.3489	54.7867	48.9004	52.9709	57.4995	52.9074	45.1281	52.7481	49.0111	49.4101	51.3143	43.4536	54.2488	47.2566	0	0	0	0
sp|Q8N9N2-2|ASCC1_HUMAN	sp	Q8N9N2-2	HUMAN	ASCC1	Isoform 2 of Activating signal cointegrator 1 complex subunit 1	4	4	1	0	11	7	4	7	1137.24	1035.24	1051.37	1024.71	1065.9	973.565	1036.14	978.987	1029.68	1016.28	960.281	1118.73	1099.67	1078.15	1112.74	1028.46	508.702	524.475	461.009	488.314	491.479	492.264	488.965	493.533	503.157	469.101	440.737	498.453	514.483	497.159	523.475	482.281	1412.04	1519.75	1457.32	1531.26
sp|Q9H1I8|ASCC2_HUMAN	sp	Q9H1I8	HUMAN	ASCC2	Activating signal cointegrator 1 complex subunit 2	9	5	1	0	11	15	7	11	801.809	768.82	779.189	770.058	802.728	732.512	832.482	724.534	733.793	758.255	736.88	878.383	793.674	798.165	873.463	749.09	289.893	262.675	302.537	285.068	263.878	236.835	295.768	287.288	274.538	260.651	246.517	277.768	279.751	287.61	297.833	238.868	1329.6	1544.47	1479.32	1434.11
sp|Q8N3C0|ASCC3_HUMAN	sp	Q8N3C0	HUMAN	ASCC3	Activating signal cointegrator 1 complex subunit 3	41	27	1	0	42	35	30	45	3525.31	3223.23	3346.1	3229.31	2794.23	3389.98	3289.17	3541.8	3189.79	3259.32	3015.51	3460.94	3511.63	3336.45	3236.3	2990.08	2362.64	2238.04	2254.57	2210.05	2007.25	2162.42	2320.07	2371.61	2153.15	2205.5	2126.57	2266.81	2302.91	2229.74	2245.25	2241.36	8242.6	8626.25	7859.42	8224.65
sp|Q9Y294|ASF1A_HUMAN	sp	Q9Y294	HUMAN	ASF1A	Histone chaperone ASF1A	7	4	1	0	2	3	1	5	287.621	223.921	222.881	207.556	164.155	142.953	252.171	220.411	218.142	209.651	210.469	245.534	213.625	160.532	129.133	131.329	298.283	251.851	243.672	221.657	217.883	184.976	275.81	257.654	250.229	218.826	202.41	269.165	274.523	268.428	243.798	169.696	170.161	191.389	159.507	166.915
sp|Q9UBL3|ASH2L_HUMAN	sp	Q9UBL3	HUMAN	ASH2L	Set1/Ash2 histone methyltransferase complex subunit ASH2	17	12	1	0	13	19	18	7	1466.7	1479.82	1430.25	1446.22	1418.14	1350.48	1451.38	1379.42	1372.25	1356.54	1300.49	1492.09	1434.49	1450.32	1440.01	1367.82	750.574	709.131	720.066	761.966	707.339	751.394	721.059	739.989	708.916	724.938	674.394	733.761	776.837	736.503	723.413	654.857	1767.86	1897.91	1994.91	1790.79
sp|P04424|ARLY_HUMAN	sp	P04424	HUMAN	ASL	Argininosuccinate lyase	11	12	1	0	9	7	7	11	1439.91	1341.35	1350.81	1334.25	1421.35	1324.4	1318.6	1296.25	1375.85	1345.21	1338.56	1462.56	1417.01	1474.67	1472	1396.8	805.737	850.928	804.561	761.584	787.958	767.497	810.689	773.211	805.777	753.255	729.031	836.577	805.27	824.115	804.395	786.674	1640.79	1478.07	1405.53	1423.2
sp|O95671|ASML_HUMAN	sp	O95671	HUMAN	ASMTL	N-acetylserotonin O-methyltransferase-like protein	7	12	1	0	15	16	13	14	376.418	371	387.981	363.696	365.17	386.213	364.131	361.623	365.254	355.966	363.041	378.355	360.216	390.36	385.725	435.613	1091.31	900.937	972.253	966.409	977.612	1036.38	1016.65	1024.12	990.877	935.443	1022.02	1065.54	1020.98	1114.56	1091.85	1139.66	2137.15	2096.26	2223.02	2074.31
sp|O43681|ASNA_HUMAN	sp	O43681	HUMAN	ASNA1	ATPase ASNA1	26	27	1	0	19	27	18	21	2899.48	2796.86	2739.01	2723.57	2618.66	2660.18	2761.46	2666.35	2693.49	2655.28	2632.84	2855.92	2791.87	3011.17	3003.58	3024.13	2101.23	2001.89	2077.79	2099.11	2136.02	2086.23	2120.23	2093.42	2044.07	2044.51	2001.16	2149.63	2097.82	2101.25	2113.23	2111.73	3541.35	3491.57	3594.24	3431.56
sp|P08243|ASNS_HUMAN	sp	P08243	HUMAN	ASNS	Asparagine synthetase [glutamine-hydrolyzing]	41	52	1	0	52	43	42	38	5365.99	4716.97	4641.97	4444.73	4443.51	4269.51	4734.99	4446.29	4357.17	4322.46	4118.4	4895.47	4795.47	4678.76	4683.57	4720.07	4692.1	4365.44	4658.29	4467.83	4265.44	4385.34	4595.08	4484.55	4417.67	4332.44	3941.39	4687.88	4668.58	4805.7	4653.36	4034.82	8885.29	9063.92	8985.34	8655.88
sp|Q12797|ASPH_HUMAN	sp	Q12797	HUMAN	ASPH	Aspartyl/asparaginyl beta-hydroxylase	56	48	1	0	51	45	53	71	6447.74	6156.59	6231.25	6132.81	5730.64	6014.04	6039.26	6145.71	6102.64	5924.93	6065.34	4770.19	5989.88	6536.9	6259.2	6173.72	6137.66	6399.18	5900.71	5953.17	5628.68	5762.77	6171.15	5976.03	5767.64	5919.49	6225.76	6324.99	6256.97	6240.54	5972.66	6735.13	8246.32	7913.05	7861.34	8271.66
sp|Q8IZT6|ASPM_HUMAN	sp	Q8IZT6	HUMAN	ASPM	Abnormal spindle-like microcephaly-associated protein	3	2	1	0	9	7	8	6	106.731	112.037	132.161	104.394	74.9758	60.0666	121.209	118.717	117.749	133.512	93.2723	106.979	97.3585	77.4637	60.92	46.1175	405.078	538.669	440.795	419.753	364.044	258.346	499.075	468.119	418.59	390.914	320.669	460.61	452.75	383.21	396.209	376.083	1519.73	1154.6	1442.08	1487.72
sp|Q9BZE9-2|ASPC1_HUMAN	sp	Q9BZE9-2	HUMAN	ASPSCR1	Isoform 2 of Tether containing UBX domain for GLUT4	3	5	1	0	13	15	9	14	168.839	177.324	168.202	146.069	169.507	161.853	186.71	168.874	174.582	177.761	165.771	185.791	175.164	169.3	183.235	168.481	150.296	129.245	138.319	138.423	144.81	154.511	143.58	143.515	134.813	129.514	125.854	148.506	135.754	141.791	157.581	129.938	2206.28	1999.37	1891.71	1831.6
sp|P00966|ASSY_HUMAN	sp	P00966	HUMAN	ASS1	Argininosuccinate synthase	2	7	1	0	13	15	16	10	177.231	178.608	162.242	168.216	180.912	190.671	168.258	175.837	163.581	158.17	188.813	177.142	173.709	181.444	181.949	194.417	314.412	219.823	237.874	211.454	203.483	301.716	225.552	211.232	223.966	258.756	292.673	236.86	238.019	295.309	297.685	286.339	2414.48	2632.65	2810.72	2274.34
sp|Q9NVM9|ASUN_HUMAN	sp	Q9NVM9	HUMAN	ASUN	Protein asunder homolog	9	4	1	0	22	12	14	12	738.03	698.546	654.866	610.887	635.265	633.524	697.644	638.468	635.065	673.535	625.577	729.707	704.924	650.337	677.018	670.214	218.452	195.43	207.571	196.596	204.578	241.411	205.38	194.758	189.124	191.653	221.551	231.402	199.037	228.062	221.357	196.676	3122.5	3263.8	3269.42	3205.05
sp|Q76L83|ASXL2_HUMAN	sp	Q76L83	HUMAN	ASXL2	Putative Polycomb group protein ASXL2	1	0	0	1	6	3	3	5	18.5363	24.4132	23.7575	18.5252	12.0761	18.2989	16.2632	21.531	15.7717	17.8495	18.8257	18.5126	19.7398	19.1876	15.2261	19.5075	0	0	0	0	0	0	0	0	0	0	0	0	0	0	0	0	740.585	760.051	764.508	744.772
sp|Q8NBU5|ATAD1_HUMAN	sp	Q8NBU5	HUMAN	ATAD1	ATPase family AAA domain-containing protein 1	11	6	1	0	9	6	4	6	1146.23	1070.56	1068.21	1104.43	1015.92	1061.63	1066.49	1061.76	1103.76	1149.59	1275.45	1035.57	1039.81	978.602	874.765	807.699	430.309	429.165	454.517	458.544	434.452	345.386	433.957	450.534	441.41	485.912	444.789	427.578	453.161	430.645	420.434	407.153	1723.86	1654.4	1539.91	1698.65
sp|Q6PL18|ATAD2_HUMAN	sp	Q6PL18	HUMAN	ATAD2	ATPase family AAA domain-containing protein 2	5	0	0	1	9	16	9	8	462.525	357.546	142.122	114.367	122.835	120.788	360.74	157.133	107.022	129.777	130.285	761.202	620.635	469.992	443.099	289.402	0	0	0	0	0	0	0	0	0	0	0	0	0	0	0	0	1373.07	1404.23	1054.28	1439.67
sp|Q9NVI7-2|ATD3A_HUMAN	sp	Q9NVI7-2	HUMAN	ATAD3A	Isoform 2 of ATPase family AAA domain-containing protein 3A	21	21	1	0	12	16	15	13	1991.51	1848.74	1915.88	1794.5	1718.3	1929.24	1887.86	1977.25	1836.7	1819.56	1874.95	1806.18	2017.01	2059.57	2064.61	2040.71	1331.64	1597.85	1503.88	1361.03	1288.05	1336.15	1512.85	1431.66	1305.55	1378.39	1485.68	1538.51	1484.47	1452.66	1355.49	1353.03	1762.41	1829.48	1757.09	1827.56
sp|Q5T9A4|ATD3B_HUMAN	sp	Q5T9A4	HUMAN	ATAD3B	ATPase family AAA domain-containing protein 3B	21	22	1	0	18	40	33	36	1737.31	1570.06	1682.58	1693.15	1575.8	1726.67	1610.18	1759.99	1653.46	1674.52	1707.01	1622.03	1782.74	1806.18	1893.33	1816.81	1429.16	1714.73	1521.93	1450.09	1329.84	1290.85	1477.91	1421.48	1369.2	1440.1	1527.28	1530.76	1534.8	1456.32	1402.13	1391.34	2750.12	2564.36	2681.71	2529.17
sp|Q96QE3|ATAD5_HUMAN	sp	Q96QE3	HUMAN	ATAD5	ATPase family AAA domain-containing protein 5	1	1	1	0	1	4	4	1	17.7461	24.3455	25.834	18.0592	11.9565	8.71281	20.7084	28.2547	25.8248	14.0746	11.5812	19.2242	25.9249	16.0932	12.5666	8.5601	57.3886	39.5175	50.3361	31.0977	35.6686	22.2396	36.8641	32.5563	38.0725	38.0968	36.7024	57.247	42.614	62.9814	47.9918	57.1582	75.5227	64.6148	56.7538	70.2528
sp|Q5SQI0|ATAT_HUMAN	sp	Q5SQI0	HUMAN	ATAT1	Alpha-tubulin N-acetyltransferase 1	1	0	0	1	2	1	4	1	85.9011	80.0263	78.8698	78.7729	74.0613	70.5706	76.5916	80.7721	69.4193	69.2998	71.5519	74.3135	72.3548	76.6125	78.3371	79.8065	0	0	0	0	0	0	0	0	0	0	0	0	0	0	0	0	487.688	580.783	793.237	583.941
sp|O95260|ATE1_HUMAN	sp	O95260	HUMAN	ATE1	Arginyl-tRNA--protein transferase 1	6	4	1	0	15	13	4	8	432.653	327.452	345.65	349.43	332.395	361.471	368.369	345.545	369.148	372.178	413.252	345.901	364.274	351.574	387.316	407.612	367.092	332.284	317.069	317.254	302.906	313.128	327.996	316.196	329.87	318.392	338.283	336.867	314.768	317.731	326.283	376.386	1738.89	1659.92	1699.1	1488.02
sp|O95260-2|ATE1_HUMAN	sp	O95260-2	HUMAN	ATE1	Isoform ATE1-2 of Arginyl-tRNA--protein transferase 1	2	2	1	0	1	1	0	1	70.31	78.7432	75.0703	72.9711	85.8444	70.1573	72.6602	69.5069	65.9514	64.2885	72.0044	84.5826	78.3722	72.1779	80.7488	79.718	111.343	96.9785	111.622	115.371	102.938	86.1826	99.9355	97.2321	96.7403	112.393	101.178	103.008	111.135	100.211	113.243	118.091	168.879	204.85	171.848	164.168
sp|P18846|ATF1_HUMAN	sp	P18846	HUMAN	ATF1	Cyclic AMP-dependent transcription factor ATF-1	3	0	0	1	3	5	5	1	214.174	214.091	175.558	172.181	156.42	150.491	223.632	199.47	188.164	170.305	188.793	224.779	212.081	179.78	187.18	188.669	0	0	0	0	0	0	0	0	0	0	0	0	0	0	0	0	342.692	341.931	291.593	354.633
sp|P15336|ATF2_HUMAN	sp	P15336	HUMAN	ATF2	Cyclic AMP-dependent transcription factor ATF-2	1	1	1	0	3	3	9	4	45.2628	35.0969	39.31	33.4958	38.6121	35.1693	33.0047	36.2937	38.0047	37.2104	44.1634	37.5485	32.4887	35.9228	34.6001	37.9375	61.1416	26.9596	28.4677	29.3572	30.7303	26.3252	29.595	31.0021	38.4368	58.2721	56.5016	59.2531	58.3716	59.8306	63.9587	59.9154	555.922	422.453	517.793	431.246
sp|P17544|ATF7_HUMAN	sp	P17544	HUMAN	ATF7	Cyclic AMP-dependent transcription factor ATF-7	0	2	0	1	5	5	3	6	0	0	0	0	0	0	0	0	0	0	0	0	0	0	0	0	110.661	114.264	98.8644	107.784	111.117	82.8351	105.96	92.774	87.3769	94.7653	83.8105	102.967	113.941	120.843	120.771	123.486	655.913	738.489	719.199	694.516
sp|Q6VMQ6-4|MCAF1_HUMAN	sp	Q6VMQ6-4	HUMAN	ATF7IP	Isoform 3 of Activating transcription factor 7-interacting protein 1	5	6	1	0	15	15	12	10	347.736	331.73	314.882	292.293	277.589	260.698	322.634	297.332	284.583	275.948	249.414	351.277	307.016	250	252.721	239.37	417.43	404.387	363.592	369.568	359.149	313.898	398.641	351.091	342.892	364.289	300.898	406.988	411.164	412.537	408.339	338.345	1959.25	1989.94	2024.47	2008.32
sp|Q9BSB4|ATGA1_HUMAN	sp	Q9BSB4	HUMAN	ATG101	Autophagy-related protein 101	5	2	1	0	1	5	4	6	345.426	340.141	307.718	272.818	237.168	236.604	324.647	279.727	315.299	344.084	333.659	367.129	322.101	246.285	200.724	236.604	65.6868	38.6572	44.7272	46.3234	34.6606	42.2678	56.5778	50.4195	58.0816	45.8837	52.3784	64.2947	65.0913	60.5285	55.5161	45.4836	84.3773	93.6042	86.2271	85.9714
sp|O94817|ATG12_HUMAN	sp	O94817	HUMAN	ATG12	Ubiquitin-like protein ATG12	4	1	1	0	1	2	2	3	820.401	804.146	729.446	711.059	648.999	701.44	798.42	721.979	691.483	734.106	830.032	858.947	777.451	691.017	703.724	727.618	40.9118	35.1351	36.0371	30.9313	31.7263	28.497	40.9716	37.833	30.732	41.8114	44.4524	44.213	43.5788	33.1389	39.1544	36.5876	427.247	458.418	412.004	445.635
sp|Q676U5|A16L1_HUMAN	sp	Q676U5	HUMAN	ATG16L1	Autophagy-related protein 16-1	11	15	1	0	13	14	14	16	621.069	606.265	644.865	635.195	612.937	593.935	606.777	638.079	651.61	632.103	635.311	602.714	587.957	632.475	607.061	637.939	970.928	901.053	914.111	887.329	910.129	927.787	879.265	882.44	888.502	919.042	912.836	928.928	930.303	900.614	944.001	886.805	2198.97	2094.92	2148.49	1991.25
sp|Q2TAZ0-3|ATG2A_HUMAN	sp	Q2TAZ0-3	HUMAN	ATG2A	Isoform 2 of Autophagy-related protein 2 homolog A	0	1	0	1	3	5	2	1	0	0	0	0	0	0	0	0	0	0	0	0	0	0	0	0	22.6281	14.8697	11.707	14.0814	17.8804	12.682	16.0787	16.118	14.0917	21.0101	17.2603	16.3014	18.6104	16.5042	17.661	21.2883	301.413	190.548	327.078	311.972
sp|Q96BY7|ATG2B_HUMAN	sp	Q96BY7	HUMAN	ATG2B	Autophagy-related protein 2 homolog B	8	2	1	0	13	12	8	13	1349.88	1400.42	1364.52	1314.79	1297.35	1234.96	1354.45	1383	1310.56	1261.46	1259.76	1379.58	1410.65	1347.01	1221.24	1210.52	114.682	98.6282	114.297	112.979	113.156	99.659	104.057	112.179	104.549	109.649	111.89	111.212	118.595	112.772	118.21	104.387	2347.13	2368.14	2380.16	2294.15
sp|Q9NT62|ATG3_HUMAN	sp	Q9NT62	HUMAN	ATG3	Ubiquitin-like-conjugating enzyme ATG3	13	12	1	0	7	7	4	4	813.454	774.48	791.818	731.407	772.766	705.482	774.951	804.653	788.378	736.346	774.301	818.181	819.366	796.204	715.553	698.12	1042.28	1111.01	1079.95	1047.76	1034.47	895.826	1058.33	1103.29	1107.72	999.274	951.993	1095.61	1078.46	1059.31	957.304	931.227	1284.79	1245.28	1177.87	1154.59
sp|Q8WYN0|ATG4A_HUMAN	sp	Q8WYN0	HUMAN	ATG4A	Cysteine protease ATG4A	3	3	1	0	6	2	1	3	361.048	408.014	398.306	408.071	360.627	351.475	413.057	419.249	404.589	355.557	362.673	410.693	416.75	395.323	331.43	322.97	170.685	182.579	191.931	192.713	184.289	173.801	205.927	192.661	173.236	179.189	205.546	192.649	202.609	189.563	187.683	156.523	426.284	424.937	449.551	407.825
sp|Q9Y4P1-2|ATG4B_HUMAN	sp	Q9Y4P1-2	HUMAN	ATG4B	Isoform 2 of Cysteine protease ATG4B	10	10	1	0	11	3	3	3	588.624	576.805	580.602	501.23	466.057	440.731	578.925	539.354	499.493	495.325	443.965	585.467	581.046	568.329	506.468	470.623	611.272	535.805	600.702	542.317	551.173	456.511	592.031	558.63	522.733	520.65	466.222	610.056	614.62	587.576	559.136	525.043	1025.44	1014.68	1013.27	1014.21
sp|Q96DT6|ATG4C_HUMAN	sp	Q96DT6	HUMAN	ATG4C	Cysteine protease ATG4C	1	1	1	0	6	1	1	1	85.4519	81.4525	65.2819	68.2388	61.574	60.734	97.8347	72.531	66.1148	63.9294	65.3853	80.8713	75.2111	31.4822	25.1276	24.4404	41.5392	38.9708	33.0803	34.0471	38.9205	30.7242	44.0692	31.7364	41.9472	38.6307	31.2791	43.5956	41.0081	34.5491	34.3819	22.1088	610.607	597.665	677.966	563.532
sp|Q9H1Y0|ATG5_HUMAN	sp	Q9H1Y0	HUMAN	ATG5	Autophagy protein 5	3	4	1	0	7	7	5	8	483.373	419.095	413.629	432.523	425.927	442.258	431.423	414.368	414.674	437.389	439.848	424.134	449.003	452.792	450.448	431.797	426.587	401.771	462.812	447.919	438.042	448.955	468.624	424.168	445.382	423.629	435.165	464.088	450.115	425.376	406.33	375.857	1326.82	1151.82	1190.78	1094.36
sp|O95352|ATG7_HUMAN	sp	O95352	HUMAN	ATG7	Ubiquitin-like modifier-activating enzyme ATG7	22	28	1	0	13	10	20	16	2148.29	2166.85	2275.4	2260.06	2232.37	2320.02	2141.69	2213.82	2168.45	2366.89	2291.09	2181.23	2160.84	2248.17	2245.95	2258.83	2632.94	2469.98	2686.4	2612.01	2558.55	2245.68	2616.32	2585.56	2624.91	2645.24	2510.32	2721.69	2586.81	2648.79	2618.25	2571.91	3565.31	3743.96	3367.9	3530.85
sp|Q7Z3C6|ATG9A_HUMAN	sp	Q7Z3C6	HUMAN	ATG9A	Autophagy-related protein 9A	1	2	1	0	2	7	5	0	146.333	147.429	130.202	130.571	124.834	137.158	151.202	174.991	119.622	127.891	122.643	132.379	138.677	143.089	132.913	130.049	275.835	371.888	339.177	293.006	261.12	210.208	314.074	276.461	279.367	275.646	227.258	307.768	332.768	290.348	248.856	285.051	96.3078	98.2408	127.44	76.176
sp|P31939|PUR9_HUMAN	sp	P31939	HUMAN	ATIC	Bifunctional purine biosynthesis protein PURH	100	98	1	0	62	60	53	56	12161.8	11722.7	11580.6	11800.1	11460.9	11383.7	11742.1	11576.4	11627.4	11566.2	11431	12103	12127.2	12557.5	12776.7	12712.3	9744.04	9351.33	9538.64	9476.03	9630.74	9719.5	9571.02	9516.85	9403.46	9344.07	8822.77	9420.1	9501.36	9618.48	9623.77	9342.85	9172.11	9238.82	9382.86	8692.2
sp|Q8WXF7|ATLA1_HUMAN	sp	Q8WXF7	HUMAN	ATL1	Atlastin-1	8	9	1	0	10	5	11	9	948.961	969.694	909.768	909.311	897.207	999.09	923.661	943.493	918.696	867.47	919.437	726.576	892.628	932.014	932.442	948.042	781.087	823.39	754.951	784.449	717.429	724.291	813.41	757.866	757.282	778.742	817.857	768.633	775.737	759.99	725.562	770.194	1270.88	1314.15	1297.38	1227.37
sp|Q8NHH9|ATLA2_HUMAN	sp	Q8NHH9	HUMAN	ATL2	Atlastin-2	9	6	1	0	10	8	6	9	694.027	694.726	719.348	726.963	754.404	711.454	700.406	679.252	674.896	719.585	662.296	576.708	676.608	720.05	709.55	626.946	485.879	259.255	563.354	505.232	458.239	263.988	506.675	520.433	491.824	528.04	414.67	534.235	473.145	471.47	496.933	471.61	1142.29	1207.03	1137.16	1073.63
sp|Q6DD88|ATLA3_HUMAN	sp	Q6DD88	HUMAN	ATL3	Atlastin-3	47	50	1	0	49	48	37	48	5952.07	6000.75	6081.4	6020.17	5877.29	6059.98	5799.74	6315.05	5989.33	5691.29	5874.61	4757.9	6021.4	6383.05	6184.44	5925.43	4491.44	4741.92	4524.79	4646.59	4547.97	4130.52	4680.31	4738.82	4729.29	4665.5	4568.51	4756.33	4632.83	4585.62	4375.76	4568.24	8052.03	8118.69	7853.15	7661.53
sp|Q13315|ATM_HUMAN	sp	Q13315	HUMAN	ATM	Serine-protein kinase ATM	8	6	1	0	22	20	15	25	366.487	350.118	353.511	368.31	324.83	345.538	348.751	336.677	374.377	342.09	328.894	392.686	368.108	363.021	325.637	307.183	286.071	247.243	290.567	264.148	260.623	205.776	278.801	268.995	263.656	297.303	256.891	329.439	302.098	284.038	288.256	231.575	2843.16	2805.16	3071.51	2855.91
sp|P54259|ATN1_HUMAN	sp	P54259	HUMAN	ATN1	Atrophin-1	0	3	0	1	5	3	0	3	0	0	0	0	0	0	0	0	0	0	0	0	0	0	0	0	281.395	260.121	256.11	258.63	265.323	233.177	274.551	240.186	232.475	198.265	186.947	298.434	298.182	282.904	264.551	277.471	569.902	570.019	598.767	593.934
sp|O00244|ATOX1_HUMAN	sp	O00244	HUMAN	ATOX1	Copper transport protein ATOX1	4	5	1	0	14	9	5	7	1232.11	1203.33	1089.31	1133.7	1111.37	989.736	1185.23	1143.49	1141.69	1098.65	1067.97	1269.3	1202.38	1279.26	1185.91	1278.14	638.697	663.431	578.331	583.662	641.363	601.271	587.245	570.166	559.42	571.88	540.636	611.828	604.34	619.434	616.995	614.922	1855.46	1709.82	1851.8	1643.95
sp|Q9P241|AT10D_HUMAN	sp	Q9P241	HUMAN	ATP10D	Probable phospholipid-transporting ATPase VD	2	0	0	1	3	2	0	2	260.779	162.237	189.144	198.019	224.155	216.573	194.056	192.335	206.132	220.29	243.21	201.568	237.425	226.223	208.624	217.891	0	0	0	0	0	0	0	0	0	0	0	0	0	0	0	0	232.323	197.161	206.528	214.912
sp|Q9Y2G3|AT11B_HUMAN	sp	Q9Y2G3	HUMAN	ATP11B	Probable phospholipid-transporting ATPase IF	2	3	1	0	7	6	6	8	161.044	143.916	154.759	164.629	154.666	174.623	152.136	172.569	141.853	148.968	164.034	136.611	172.154	152.725	154.201	148.759	137.001	180.658	171.935	155.839	135.86	127.413	160.631	148.135	145.792	146.756	152.803	163.5	154.355	156.99	135.762	138.219	1106.55	995.824	1121.79	1177.55
sp|Q8NB49|AT11C_HUMAN	sp	Q8NB49	HUMAN	ATP11C	Phospholipid-transporting ATPase IG	6	3	1	0	15	17	13	20	734.605	732.239	761.99	797.826	711.713	798.104	686.871	835.71	778.554	792.646	809.321	563.778	706.901	788.079	679.225	688.288	316.103	541.405	465.676	407.702	351.829	285.001	379.71	387.596	407.068	405.337	374.515	404.61	385.498	380.396	326.504	337.847	2524	2060.56	2228.1	2315.7
sp|P54707-2|AT12A_HUMAN	sp	P54707-2	HUMAN	ATP12A	Isoform 2 of Potassium-transporting ATPase alpha chain 2	4	5	1	0	5	8	9	8	380.644	263.48	326.545	310.208	384.089	437.252	242.484	327.037	318.464	390.122	417.048	242.122	280.419	351.253	407.806	392.539	255.727	484.491	382.733	362.155	331.995	303.145	327.482	308.322	332.562	335.028	306.828	313.932	298.113	317.713	278.939	320.468	1199.64	1089.86	1168.58	1203.27
sp|Q9HD20|AT131_HUMAN	sp	Q9HD20	HUMAN	ATP13A1	Manganese-transporting ATPase 13A1	28	23	1	0	30	40	29	33	1678.96	1681.77	1789.71	1762.62	1846.48	1808.61	1772.02	1872.83	1729.76	1727.34	1722.14	1384.23	1644.25	1773.72	1687.7	1716.99	1614.14	1729.44	1627.02	1588.84	1552.17	1589.74	1633.93	1668.73	1633.21	1630.91	1649.76	1632.3	1660.63	1692.24	1528.2	1713.27	4826.51	4778.19	4949.39	4615.27
sp|Q9H7F0|AT133_HUMAN	sp	Q9H7F0	HUMAN	ATP13A3	Probable cation-transporting ATPase 13A3	0	1	0	1	7	9	7	9	0	0	0	0	0	0	0	0	0	0	0	0	0	0	0	0	21.7865	22.5727	24.0145	29.702	22.6097	14.1447	18.1824	22.8202	26.0084	22.6201	25.2779	25.7001	27.75	23.6672	24.0307	18.7148	1459.16	1087.73	1104.37	1313.63
sp|P05023|AT1A1_HUMAN	sp	P05023	HUMAN	ATP1A1	Sodium/potassium-transporting ATPase subunit alpha-1	50	42	1	0	45	39	36	37	5023.41	4538.11	5228.24	5267.16	4819.26	5778.64	4401.96	5431.29	5132.15	4889.53	5607.7	3746.62	4501.98	5211.78	4898.26	5451.77	3697.04	6900.86	5363.8	4945.29	4322.47	3553.16	4668.02	4775.51	4602.52	4623.94	4583.02	4518.91	4389.71	4559.58	3999.17	4560.06	6894.61	6344.78	7050.78	6864.24
sp|P13637-3|AT1A3_HUMAN	sp	P13637-3	HUMAN	ATP1A3	Isoform 3 of Sodium/potassium-transporting ATPase subunit alpha-3	10	16	1	0	20	16	12	14	1554.3	1588.33	1805.13	1708.02	1708.17	2046.21	1488.2	1875.24	1673.71	1688.63	1853.12	1178.25	1495.15	1796.7	1663.07	1747.58	1098.68	1877.67	1519.91	1457.26	1296.6	1048.61	1377.83	1319.88	1301.98	1326.55	1292.19	1306.37	1297.15	1318.2	1127.13	1277.54	2801.58	2275.02	2318.89	2409
sp|P05026|AT1B1_HUMAN	sp	P05026	HUMAN	ATP1B1	Sodium/potassium-transporting ATPase subunit beta-1	6	3	1	0	8	12	10	11	683.155	544.68	633.964	674.84	628.647	743.01	540.879	640.834	621.817	648.365	765.89	461.384	528.652	656.956	640.076	720.61	85.4456	156.486	145.319	124.933	102.265	96.2688	110.413	108.844	117.941	110.261	121.63	109.557	95.8356	102.324	96.5663	103.984	1413.92	1303.14	1411	1343
sp|P54709|AT1B3_HUMAN	sp	P54709	HUMAN	ATP1B3	Sodium/potassium-transporting ATPase subunit beta-3	30	21	1	0	14	20	19	12	2931.66	2889.8	3225.98	3233.25	2794.6	3413.98	2744.27	3322.72	3131.23	3016.28	3294.98	2384.84	2803.36	3064.24	3047.66	3410.67	1369.99	2299.29	1878.01	1834.3	1603.54	1399.45	1645.68	1686.97	1648.17	1630.75	1613.38	1612.98	1597.25	1611.86	1466.48	1720.48	2811.46	2315.09	2250.57	2411.28
sp|P16615|AT2A2_HUMAN	sp	P16615	HUMAN	ATP2A2	Sarcoplasmic/endoplasmic reticulum calcium ATPase 2	58	57	1	0	83	106	82	99	6791.52	6133.24	5954.99	5377.57	4956.7	4820.2	6062.97	6117.36	5942.11	5741	5894.81	5132.28	6270.28	5831.23	5206.15	5190.01	4929.86	4848.35	4398.6	4372.82	4121.03	3944.39	4675.67	4633.83	4500.73	4428.81	4452.08	4796.13	4874.71	4979.72	4581.73	4833.91	18044.2	16705.2	16477	16864.6
sp|P20020|AT2B1_HUMAN	sp	P20020	HUMAN	ATP2B1	Plasma membrane calcium-transporting ATPase 1	27	32	1	0	59	54	50	59	3159.93	2776.81	3172.3	3151.6	3006.75	3665.53	2654.59	3331.06	3155.77	3070.5	3446.11	2217.43	2844.21	3302.66	3063.93	3246.62	2220.1	3609.5	3112.32	2874.68	2600.28	2141.99	2747.59	2798	2789.6	2764.88	2663.62	2687.69	2705.23	2820.22	2366.26	2581.59	12939.7	10700.6	12861.7	12499.9
sp|P23634|AT2B4_HUMAN	sp	P23634	HUMAN	ATP2B4	Plasma membrane calcium-transporting ATPase 4	19	21	1	0	50	36	35	41	2530.04	2289.91	2591.41	2700.6	2473.6	3084.97	2228.29	2747.84	2590.69	2573.49	2802.23	1870.03	2279.38	2652.76	2512.21	2567.11	2277.23	3490.8	3061.49	2690.08	2462.94	1917.79	2530.17	2582.39	2547.11	2673.85	2604.67	2632.03	2465.17	2643.11	2355.04	2553.69	8434.92	7441.45	8075.13	8391.06
sp|P98194-7|AT2C1_HUMAN	sp	P98194-7	HUMAN	ATP2C1	Isoform 7 of Calcium-transporting ATPase type 2C member 1	5	7	1	0	18	20	15	15	345.048	304.579	320.035	297.316	281.061	304.661	326.554	315.532	275.022	268.027	279.75	266.272	298.542	311.69	279.135	297.579	266.058	368.546	303.502	290.607	265.938	250.39	338.508	300.628	270.716	253.82	270.814	314.948	322.059	295.022	293.186	298.987	2123.31	2176.58	2015.36	2141.42
sp|P25705|ATPA_HUMAN	sp	P25705	HUMAN	ATP5A1	ATP synthase subunit alpha, mitochondrial	133	110	1	0	93	125	95	126	13805.2	13382.8	13650.8	13348.3	13402.7	15517.3	13671.3	14000.8	13406.8	14016	14632.6	13566.8	13875.4	14546.7	15178.3	15437.7	10488.4	10295.1	10658.8	10558	10669.2	12755.5	10455.5	10227.1	10471.9	10850	12729.4	11135.2	10901.5	10866.1	10752.2	10603.6	15466.1	14136.1	15749.9	15276.8
sp|P06576|ATPB_HUMAN	sp	P06576	HUMAN	ATP5B	ATP synthase subunit beta, mitochondrial	101	90	1	0	78	87	66	67	9867.6	10144.2	10008.5	9949.38	9733.07	10932.8	10053.7	10290.4	9921.57	9863.11	10538.6	9962.87	10276.4	10590.1	10614.6	11274.6	6787.17	7175.07	6822.55	6815.54	6935.78	8147.57	6967.38	6925.29	6687.94	7177.81	8335.03	6958.62	7127.53	7035.91	6703.22	7005.92	10998	10204.8	11335.2	10754.8
sp|P36542|ATPG_HUMAN	sp	P36542	HUMAN	ATP5C1	ATP synthase subunit gamma, mitochondrial	44	38	1	0	19	26	22	27	6758.54	6770.96	6862.7	6809.21	6856.73	7451	6861.83	6530.03	6502.83	6961.66	6928.56	6773.16	6742.33	7137.21	7441.44	7449.45	4876.45	4682.16	4862.98	4851.39	5072.06	5671.38	4796.63	4856.82	4770.91	5166.07	5903.75	4859.55	4887.33	4902.36	4905.32	4765.75	4827.05	5118.16	5103.22	5409.8
sp|P30049|ATPD_HUMAN	sp	P30049	HUMAN	ATP5D	ATP synthase subunit delta, mitochondrial	3	5	1	0	2	3	3	3	459.319	448.753	465.405	429.797	458.48	461.849	443.964	425.846	436.547	500.349	471.371	479.205	459.563	449.946	492.412	452.335	243.662	179.582	235.137	240.23	256.406	313.037	219.24	237.547	249.654	256.08	280.605	245.356	231.559	254.624	257.233	249.492	113.415	114.072	104.67	97.7711
sp|P56381|ATP5E_HUMAN	sp	P56381	HUMAN	ATP5E	ATP synthase subunit epsilon, mitochondrial	4	8	1	0	1	4	4	5	211.219	212.7	214.282	203.407	211.428	242.943	222.809	197.056	205.797	225.125	214.765	218.133	222.051	221.362	223.353	208.527	556.732	576.673	509.887	508.703	546.477	643.333	542.871	506.544	518.436	560.532	663.796	553.364	565.451	564.895	563.712	570.059	147.469	121.966	114.136	118.902
sp|P24539|AT5F1_HUMAN	sp	P24539	HUMAN	ATP5F1	ATP synthase F(0) complex subunit B1, mitochondrial	19	16	1	0	23	12	12	12	3126.16	2843.72	2870.02	2665.67	2566.16	3090.99	2875.88	2888.35	2754.01	2763.54	3040.81	3038.19	3030.99	3114.89	3121.84	3200.14	2728.46	2923.58	2740.05	2532.58	2310.85	2085.18	2582.78	2553.17	2396.62	2541.11	2857.16	2744.93	2661.68	2686.26	2492.25	2714.68	6321.2	6200.49	6425.78	6176.04
sp|O75947|ATP5H_HUMAN	sp	O75947	HUMAN	ATP5H	ATP synthase subunit d, mitochondrial	36	29	1	0	15	25	18	22	3794.08	3682.86	3656.57	3711.1	3662.5	4163.45	3675.34	3686.26	3711.59	3723.75	3885.84	3807.46	3914.37	3894.86	4058.51	4149.64	3682.01	3585.33	3493.24	3459.33	3641.65	3972.85	3466.35	3351.85	3440.2	3635.02	4070.3	3596.24	3546.52	3633.62	3628.18	3505.66	2997.4	2879.38	2828.57	2752.94
sp|P56385|ATP5I_HUMAN	sp	P56385	HUMAN	ATP5I	ATP synthase subunit e, mitochondrial	11	9	1	0	9	4	4	5	1874.86	1869.05	1837.34	1797.61	1701.39	2038.77	1814.82	1839.59	1779.02	1793.38	1899.09	1785.82	1888.51	1896.73	1790.7	1978.53	1156.68	1377.43	1162.99	1183.23	1189.89	1286.23	1209.03	1159.01	1181.37	1167.95	1323.05	1155.27	1210	1197.55	1168.55	1160.71	1607.86	1363.62	1450.01	1334.21
sp|P18859-2|ATP5J_HUMAN	sp	P18859-2	HUMAN	ATP5J	Isoform 2 of ATP synthase-coupling factor 6, mitochondrial	14	10	1	0	4	14	11	10	900.934	876.459	893.806	841.307	871.395	999.986	891.958	863.417	840.101	933.509	947.927	933.782	930.002	940.498	965.2	961.905	977.561	896.564	883.052	889.334	926.239	1008.69	837.452	874.787	867.381	928.719	1061.71	926.607	884.819	936.984	982.149	884.951	702.076	768.629	785.252	849.164
sp|P56134|ATPK_HUMAN	sp	P56134	HUMAN	ATP5J2	ATP synthase subunit f, mitochondrial	8	9	1	0	4	4	3	1	773.391	734.19	767.395	756.949	684.442	800.62	777.004	802.048	723.682	716.014	785.044	763.128	810.917	795.58	797.135	799.629	1089.97	1052.58	1152.88	1056.18	1005.54	1034.85	1088.51	1081.14	1073.88	1087.36	1226.64	1123.87	1108.72	1068.89	1059.88	1143.01	611.815	525.005	572.814	613.899
sp|O75964|ATP5L_HUMAN	sp	O75964	HUMAN	ATP5L	ATP synthase subunit g, mitochondrial	12	11	1	0	7	7	6	9	1670.25	1535.82	1592.79	1469.55	1479.09	1669.93	1436.44	1605.75	1328.59	1550.79	1564.76	1591.48	1574.73	1913.61	1511.66	1694.65	1154.28	1450.94	1251.76	1244.23	1132.95	1210.76	1183.08	1192.43	1196.9	1257.61	1354.18	1156.67	1224.49	1137.11	1112.14	1173.46	1095.52	946.68	924.414	1041.58
sp|P48047|ATPO_HUMAN	sp	P48047	HUMAN	ATP5O	ATP synthase subunit O, mitochondrial	35	39	1	0	9	17	14	13	3033.55	2992.66	3000.46	3132.11	3162.71	3551.63	2998.34	2995.86	3007.7	3028.88	3187.31	3095.86	3102.94	3158.83	3307.37	3350.71	3368.2	3512.87	3350.5	3390.3	3444.56	3739.61	3237.36	3322.9	3337.63	3451.89	3803.79	3315.19	3270.62	3285.72	3323.38	3337.05	1744.23	1741.47	1739.1	1868.26
sp|Q99766|ATP5S_HUMAN	sp	Q99766	HUMAN	ATP5S	ATP synthase subunit s, mitochondrial	2	2	1	0	1	0	1	1	852.539	726.793	779.973	774.744	731.919	822.893	731.601	782.09	790.889	790.97	777.594	748.658	757.739	807.504	858.102	730.787	49.1542	47.2318	58.9424	61.2281	50.2222	54.6566	50.9477	53.2269	55.6067	48.432	59.4717	59.8208	53.6368	49.688	51.8283	54.5489	135.539	97.9454	96.7082	115.891
sp|Q15904|VAS1_HUMAN	sp	Q15904	HUMAN	ATP6AP1	V-type proton ATPase subunit S1	13	9	1	0	7	5	4	7	1525.85	1383	1173.26	935.805	754.628	808.725	1323.82	1140.16	987.844	872.69	852.42	1194.42	1203.47	983.795	872.862	900.942	1078.32	1267.75	1059.37	949.047	866.643	698.277	1142.28	1043.89	941.223	916.889	858.83	1279.75	1229.6	1170.97	1091.33	1065.73	1499.87	1364.61	1384.81	1475.74
sp|O75787|RENR_HUMAN	sp	O75787	HUMAN	ATP6AP2	Renin receptor	4	2	1	0	5	5	2	3	156.735	144.45	125.063	82.7342	68.2979	63.718	149.689	110.784	82.7938	70.7301	68.6367	134.421	106.325	86.2692	67.2565	84.1994	68.9705	54.2547	46.8649	35.4009	24.7333	23.9084	67.4026	45.103	28.4009	23.0846	26.0887	81.6658	80.2439	69.0986	58.7411	57.7207	944.681	922.393	1052.59	1183.75
sp|Q93050|VPP1_HUMAN	sp	Q93050	HUMAN	ATP6V0A1	V-type proton ATPase 116 kDa subunit a isoform 1	3	8	1	0	9	5	5	12	163.899	143.359	173.387	157.745	131.821	174.079	147.34	167.283	161.507	155.811	159.929	112.076	143.018	167.579	146.83	154.858	657.326	679.784	739.908	636.501	636.159	642.021	679.471	711.943	661.618	689.074	702.255	703.334	656.748	728.201	633.558	718.839	1746.6	1698.91	1793.55	1819.77
sp|Q9Y487|VPP2_HUMAN	sp	Q9Y487	HUMAN	ATP6V0A2	V-type proton ATPase 116 kDa subunit a isoform 2	7	3	1	0	5	9	7	4	682.856	685.509	657.051	645.637	619.332	647.273	672.56	713.233	671.915	638.479	654.999	560.184	686.605	712.776	676.756	692.729	617.964	616.5	560.574	612.897	577.604	668.328	607.986	548.225	562.545	557.37	640.287	585.822	633.146	617.914	604.118	627.771	728.138	686.375	693.774	667.633
sp|P61421|VA0D1_HUMAN	sp	P61421	HUMAN	ATP6V0D1	V-type proton ATPase subunit d 1	11	20	1	0	11	10	9	9	1288.64	1316.43	1241.31	1228.4	1225.49	1170.18	1263.44	1226.32	1205.41	1275.5	1243.02	1305.43	1252.46	1162.13	1144.11	1274.42	2400.43	2385.43	2379.54	2248.08	2187.82	1889.01	2327.88	2406.21	2329.95	2319.1	2496.04	2344.46	2400.21	2297.89	2336.34	2324.12	1482.52	1313.82	1404.11	1298.82
sp|P38606|VATA_HUMAN	sp	P38606	HUMAN	ATP6V1A	V-type proton ATPase catalytic subunit A	31	36	1	0	33	33	34	39	2749.91	2649.51	2554.3	2584.26	2632.94	2663.31	2676.33	2521.28	2633.25	2695.75	2663.18	2768.89	2677.36	2791.62	2806.72	2800.85	3815.93	3550.11	3677.2	3575.72	3639.77	3787.85	3679.16	3791.71	3679.07	3619.4	3740.68	3816.09	3758.21	3826.62	3744.06	3805.14	5368.43	5482.49	5078.34	5183.31
sp|P21281|VATB2_HUMAN	sp	P21281	HUMAN	ATP6V1B2	V-type proton ATPase subunit B, brain isoform	41	41	1	0	37	33	38	29	2961.56	2793.52	2760.06	2894.98	3021.19	3046.18	2864.98	2726.16	2905.79	3138.98	3144.11	2825.71	2875.57	3048.95	3151.12	3313.35	2611.27	2237.47	2533.22	2494.85	2489.62	2673.77	2532.24	2543.42	2506.73	2611.91	2771.05	2596.29	2565.62	2640.02	2631.85	2764.06	5501.89	4950.4	5153.14	5054.65
sp|P21283|VATC1_HUMAN	sp	P21283	HUMAN	ATP6V1C1	V-type proton ATPase subunit C 1	30	31	1	0	22	22	22	22	4128.96	4035.68	4068.88	4008.3	4042.19	3984.87	4131.61	3876.86	4044.25	4210	4098.96	4208.29	4093.23	3926.54	4123.59	4369.31	3902.57	3802.66	3768.51	3689.72	3679.05	3713.98	3730	3689.82	3770.53	3789.55	3959.49	3854.18	3935.93	3854.85	3882.82	4039.1	3388.17	3929.53	3539.62	3846.29
sp|Q9Y5K8|VATD_HUMAN	sp	Q9Y5K8	HUMAN	ATP6V1D	V-type proton ATPase subunit D	6	12	1	0	16	12	9	15	630.856	598.381	552.778	510.496	478.564	473.504	617.319	566.324	541.094	578.899	546.303	650.334	618.741	588.724	570.915	576.16	562.438	500.249	470.304	509.071	482.241	527.062	543.556	517.197	507.249	506.054	563.506	563.246	575.449	553.433	528.859	547.737	3389.85	3180.15	3039.86	2977.41
sp|P36543|VATE1_HUMAN	sp	P36543	HUMAN	ATP6V1E1	V-type proton ATPase subunit E 1	20	25	1	0	22	17	18	19	1757.33	1647.07	1634.92	1653.71	1588.29	1627.22	1661.72	1619.24	1650.18	1752.44	1834.21	1716.59	1682.18	1736.65	1698.38	1808.91	2152.86	2041.82	2025.07	1985.39	1969.63	2115.79	2053.04	2012.06	2048.35	2164.59	2261.14	2077.17	2078.9	2120.09	2150.88	2213.76	3790.75	3451.98	3604.62	3524.66
sp|Q16864-2|VATF_HUMAN	sp	Q16864-2	HUMAN	ATP6V1F	Isoform 2 of V-type proton ATPase subunit F	0	1	0	1	2	4	4	4	0	0	0	0	0	0	0	0	0	0	0	0	0	0	0	0	46.1141	45.7697	42.0288	34.3534	32.9534	36.3673	50.0024	36.1206	45.815	44.559	44.8242	50.3036	43.5569	44.2182	43.2764	41.8616	774.189	698.407	698.457	692.628
sp|O75348|VATG1_HUMAN	sp	O75348	HUMAN	ATP6V1G1	V-type proton ATPase subunit G 1	11	7	1	0	8	4	6	5	659.198	625.081	633.604	620.109	638.351	632.145	641.27	633.836	639.841	679.371	707.973	640.222	647.958	650.306	677.729	718.415	340.628	309.923	292.029	290.071	309.892	379.379	312.585	309.787	320.038	321.957	356.552	326.943	331.162	302.259	319.257	361.694	767.75	788.975	829.859	790.843
sp|Q9UI12|VATH_HUMAN	sp	Q9UI12	HUMAN	ATP6V1H	V-type proton ATPase subunit H	17	16	1	0	13	14	14	22	990.905	991.068	928.708	891.016	877.543	886.901	979.145	944.138	934.59	913.462	949.872	1039.03	942.028	915.189	869.723	928.681	1375.76	1352.82	1355.56	1315	1287.7	1359.29	1395.5	1322.09	1335.92	1320.23	1428.09	1404.07	1392.5	1353.49	1301.09	1387.39	2227.16	2193.47	2069.26	2099.87
sp|Q04656-3|ATP7A_HUMAN	sp	Q04656-3	HUMAN	ATP7A	Isoform 2 of Copper-transporting ATPase 1	4	3	1	0	13	9	3	5	385.647	337.889	367.855	360.905	330.901	374.378	368.004	379.253	378.29	373.462	381.912	348.032	397.047	397.581	363.223	388.569	119.031	156.865	148.293	137.568	114.485	104.476	125.027	126.783	120.476	128.671	131.876	135.774	136.904	122.075	135.868	125.157	1463.2	1386.74	1942.05	1551.96
sp|O43520|AT8B1_HUMAN	sp	O43520	HUMAN	ATP8B1	Phospholipid-transporting ATPase IC	0	2	0	1	3	7	3	4	0	0	0	0	0	0	0	0	0	0	0	0	0	0	0	0	122.85	200.191	150.119	126.831	109.723	96.9536	194.703	174.141	127.683	123.743	109.431	185.879	198.233	167.947	133.285	88.7808	347.404	287	240.664	312.392
sp|P98198-3|AT8B2_HUMAN	sp	P98198-3	HUMAN	ATP8B2	Isoform 3 of Phospholipid-transporting ATPase ID	0	1	0	1	4	2	4	3	0	0	0	0	0	0	0	0	0	0	0	0	0	0	0	0	20.7231	41.0612	28.1373	22.2134	18.4052	15.6257	27.559	26.9191	20.9098	25.1496	21.004	24.9346	26.5037	23.78	21.0925	24.3442	379.378	357.78	445.118	422.706
sp|O75110|ATP9A_HUMAN	sp	O75110	HUMAN	ATP9A	Probable phospholipid-transporting ATPase IIA	0	3	0	1	7	6	5	8	0	0	0	0	0	0	0	0	0	0	0	0	0	0	0	0	124.951	141.629	146.471	131.648	129.667	109.315	133.449	129.846	138.82	147.486	137.254	153.347	150.589	148.822	144.414	140.89	986.566	918.086	1028.2	1029.79
sp|O43861|ATP9B_HUMAN	sp	O43861	HUMAN	ATP9B	Probable phospholipid-transporting ATPase IIB	1	1	1	0	5	2	3	3	84.1432	83.321	84.9934	84.5416	74.9314	76.8676	87.4294	92.728	74.9354	85.339	85.2792	77.8836	83.6297	86.617	71.6719	67.6187	38.1891	42.74	27.7596	32.6545	21.6061	34.5552	34.5374	33.8005	32.0938	35.4201	39.1685	38.7537	38.2515	36.4712	35.8659	38.3879	421.899	356.236	341.65	378.276
sp|Q5TC12|ATPF1_HUMAN	sp	Q5TC12	HUMAN	ATPAF1	ATP synthase mitochondrial F1 complex assembly factor 1	1	1	1	0	3	4	5	2	66.9615	67.9675	60.8826	68.911	68.8042	72.4901	67.9455	66.6959	64.3418	63.4542	68.7498	70.7208	65.1755	64.8608	63.1405	48.0254	51.6278	55.7036	45.4186	43.4411	35.5031	43.4048	60.9621	50.5067	41.4255	35.6507	33.3761	55.8312	57.748	50.9344	48.0034	32.482	725.105	790.03	849.803	871.089
sp|Q9UII2|ATIF1_HUMAN	sp	Q9UII2	HUMAN	ATPIF1	ATPase inhibitor, mitochondrial	14	8	1	0	8	7	9	6	1114.32	1177.21	1160.67	1035.49	1029.15	1136.97	1131.23	1168.03	1176.77	1102.92	1158.89	1299.29	1120.83	1209.02	1201.96	1304.24	625.293	558.716	559.015	552.324	558.14	718.828	575.152	541.558	594.633	598.972	646.719	654.041	620.46	609.055	603.789	591.582	1153.72	1237.31	1300.56	1185.71
sp|Q13535|ATR_HUMAN	sp	Q13535	HUMAN	ATR	Serine/threonine-protein kinase ATR	2	5	1	0	0	4	4	1	122.247	118.839	125.111	112.215	119.467	110.899	114.987	116.024	103.076	123.417	112.088	132.861	135.217	124.696	107.235	100.184	327.222	340.126	360.196	336.613	309.685	203.023	365.566	348.002	301.228	297.169	269.909	363.471	351.655	318.699	310.901	296.41	0	0	0	0
sp|O75882|ATRN_HUMAN	sp	O75882	HUMAN	ATRN	Attractin	1	2	1	0	4	10	5	7	30.6495	26.4048	28.064	27.7655	23.24	20.0243	28.3618	30.5649	26.3235	24.1473	27.1708	24.5122	27.3281	18.5598	22.0635	20.1955	67.2957	60.8825	72.6518	59.3319	53.482	47.2023	78.8034	63.0365	52.0777	56.9296	56.295	84.2748	80.2124	73.4666	74.3141	64.7001	387.314	397.046	368.988	392.712
sp|P46100|ATRX_HUMAN	sp	P46100	HUMAN	ATRX	Transcriptional regulator ATRX	7	11	1	0	34	27	33	35	611.495	588.142	567.827	498.643	478.122	450.729	610.588	550.007	547.857	521.717	476.33	604.317	593.35	541.737	526.872	520.528	1057.77	1007.51	1030.95	1035.92	948.727	997.312	1017.29	978.189	951.225	907.006	840.383	1055.03	1078.23	1032.85	1049.18	910.649	4758.84	4898.15	5142.04	4675.17
sp|P54253|ATX1_HUMAN	sp	P54253	HUMAN	ATXN1	Ataxin-1	4	3	1	0	8	5	4	6	833.014	792.996	773.604	798.259	732.491	779.84	787.605	776.576	792.794	711.738	751.269	840.376	848.661	822.573	833.716	793.567	190.055	165.557	167.484	160.055	171.496	195.419	150.952	153.274	152.346	169.798	186.621	165.984	173.912	181.896	208.983	171.372	1210.44	1168.26	1212.25	1143.85
sp|Q9UBB4|ATX10_HUMAN	sp	Q9UBB4	HUMAN	ATXN10	Ataxin-10	25	22	1	0	11	18	11	14	3698.2	4314.9	4200	4182.49	4079.26	3837.18	4218.58	4095.33	4081.39	4088.74	3877.12	4160.3	3646.84	2932.77	2416.04	2262.35	3100.12	3305.63	3100.54	3067.06	3073.29	2762.46	3284.11	3254.4	3052.51	3008.43	2543.68	3137.62	3182.34	3038.47	2920.51	2343.26	2322.61	2052.8	1917.72	2149.45
sp|P0C7T5|ATX1L_HUMAN	sp	P0C7T5	HUMAN	ATXN1L	Ataxin-1-like	1	0	0	1	7	5	4	2	95.3915	93.4872	92.3553	96.1026	73.5705	79.8973	95.7721	78.3734	88.867	74.4904	76.8687	92.241	91.7403	94.789	92.5603	93.3473	0	0	0	0	0	0	0	0	0	0	0	0	0	0	0	0	602.168	603.341	602.559	568.28
sp|Q99700|ATX2_HUMAN	sp	Q99700	HUMAN	ATXN2	Ataxin-2	15	15	1	0	34	34	25	27	1398.75	1334.64	1403.55	1309.94	1247.67	1166.75	1401.15	1347.37	1397.69	1442.85	1228.92	1429.7	1385.73	1287.6	1573.09	1305.69	1092.05	1078.49	1035	1027.17	1029.7	1064.74	1112.75	1090.54	1075.91	1097.61	1070.84	1126.52	1108.67	1161.91	1176.42	974.807	5673.8	5839.59	5554.24	5613.61
sp|Q8WWM7-3|ATX2L_HUMAN	sp	Q8WWM7-3	HUMAN	ATXN2L	Isoform 3 of Ataxin-2-like protein	28	16	1	0	43	42	45	38	3069.35	3137.83	3004.68	2721.99	2597.42	2439.66	3126.79	3002.15	2959.31	2962.99	2736.75	3157.4	3244.68	3217.83	3309.74	3207.62	1551.88	1527.49	1474.16	1426.66	1342.15	1263.31	1529.78	1531.55	1433.88	1451.46	1293.29	1589.18	1555.4	1577.38	1563.37	1436.08	5125.65	5019.24	4988.16	4775.05
sp|P54252|ATX3_HUMAN	sp	P54252	HUMAN	ATXN3	Ataxin-3	3	2	1	0	3	8	7	9	334.389	312.774	284.852	310.253	280.986	304.345	301.002	290.142	306.734	319.236	403.78	338.592	304.257	315.664	287.947	321.733	310.404	281.586	281.745	266.379	245.317	256.626	293.551	259.686	273.477	288.758	332.574	276.169	286.867	286.452	284.64	248.39	447.392	461.048	507.202	402.515
sp|Q14CW9-2|AT7L3_HUMAN	sp	Q14CW9-2	HUMAN	ATXN7L3	Isoform 2 of Ataxin-7-like protein 3	2	0	0	1	4	3	3	1	317.695	336.209	340.661	310.714	305.409	304.854	327.608	312.123	306.427	275.756	255.993	336.314	341.914	295.288	303.829	286.305	0	0	0	0	0	0	0	0	0	0	0	0	0	0	0	0	376.046	327.915	321.767	387.006
sp|Q96GX2|A7L3B_HUMAN	sp	Q96GX2	HUMAN	ATXN7L3B	Putative ataxin-7-like protein 3B	1	0	0	1	3	2	2	4	236.421	250.977	247.809	200.785	175.017	158.148	256.028	230.741	211.543	197.732	157.351	265.164	235.958	194.145	172.981	145.435	0	0	0	0	0	0	0	0	0	0	0	0	0	0	0	0	215.775	286.794	279.908	345.855
sp|Q13825|AUHM_HUMAN	sp	Q13825	HUMAN	AUH	Methylglutaconyl-CoA hydratase, mitochondrial	1	1	1	0	0	0	1	0	47.5765	55.8845	46.9258	41.7467	38.6875	42.5238	51.7668	52.754	46.1368	51.6346	44.5156	49.7321	48.4035	49.957	45.5514	58.2294	75.9831	59.0723	73.8364	69.4623	66.3922	72.58	67.4264	63.1256	73.8073	65.5879	72.6092	61.8428	68.4647	76.4894	69.5276	70.2143	0	0	0	0
sp|Q9Y679|AUP1_HUMAN	sp	Q9Y679	HUMAN	AUP1	Ancient ubiquitous protein 1	4	5	1	0	9	5	5	5	680.722	658.713	722.881	703.8	655.353	576.365	650.916	678.242	703.156	647.853	624.758	579.811	670.641	680.337	666.979	669.038	446.22	483.359	463.455	471.367	430.823	382.572	497.633	440.049	423.032	465.283	409.026	461.919	459.521	443.224	448.182	504.855	1229.4	1164.46	1129.9	1131.9
sp|O14965|AURKA_HUMAN	sp	O14965	HUMAN	AURKA	Aurora kinase A	1	0	0	1	9	6	6	3	74.9085	86.679	74.6794	75.6468	78.9619	55.4262	87.6678	73.6982	83.0646	82.8932	73.4833	100.711	75.1427	56.0176	55.1396	55.3612	0	0	0	0	0	0	0	0	0	0	0	0	0	0	0	0	937.48	1194.32	1105.58	1136.6
sp|Q96GD4-5|AURKB_HUMAN	sp	Q96GD4-5	HUMAN	AURKB	Isoform 5 of Aurora kinase B	2	0	0	1	2	3	6	2	248.974	260.902	226.946	197.476	194.494	169.089	251.074	215.54	207.434	172.793	160.022	315.46	246.347	185.101	168.024	144.778	0	0	0	0	0	0	0	0	0	0	0	0	0	0	0	0	98.3974	120.958	88.3881	116.374
sp|Q9NQS1|AVEN_HUMAN	sp	Q9NQS1	HUMAN	AVEN	Cell death regulator Aven	3	1	1	0	15	9	12	10	495.228	498.487	470.565	467.611	434.358	394.72	520.668	478.388	464.056	450.604	419.139	502.711	467.577	425.185	427.667	376.056	61.588	54.0464	44.707	66.5652	51.8803	42.9199	51.6175	46.6863	54.1982	59.1226	46.1	47.7442	51.0308	47.2174	61.4318	36.2815	2729.58	2586.72	2266.32	2465.21
sp|Q8NBF6|AVL9_HUMAN	sp	Q8NBF6	HUMAN	AVL9	Late secretory pathway protein AVL9 homolog	5	3	1	0	3	0	4	3	413.089	399.218	422.704	432.821	396.971	359.348	431.4	365.307	392.274	385.88	336.613	457.552	413.998	393.661	421.763	411.25	182.886	186.151	215.976	178.984	186.463	146.966	190.642	200.504	176.116	195.124	147.307	202.376	193.58	175.647	182.897	163.042	456.865	380.776	425.378	430.406
sp|O15169|AXIN1_HUMAN	sp	O15169	HUMAN	AXIN1	Axin-1	3	3	1	0	3	2	4	4	171.34	177.612	173.24	162.213	154.029	164.927	192.057	173.458	157.621	144.284	131.443	175.13	179.781	167.402	162.613	159.541	278.541	262.968	240.725	239.059	235.053	214.173	260.004	243.83	225.238	214.184	196.531	276.133	289.795	280.213	260.394	278.338	347.982	371.516	397.633	366.932
sp|P30530|UFO_HUMAN	sp	P30530	HUMAN	AXL	Tyrosine-protein kinase receptor UFO	7	21	1	0	7	19	14	13	809.113	545.018	381.515	215.948	151.331	158.475	564.914	388.642	201.996	172.421	155.972	723.808	556.905	299.839	194.796	256.481	1015.15	1573.21	1261.37	919.053	731.134	536	1716.66	1297.57	957.359	730.671	556.051	1746.84	1580.8	1241	974.821	831.788	874.079	848.577	1077.74	868.046
sp|Q9H6S1|AZI2_HUMAN	sp	Q9H6S1	HUMAN	AZI2	5-azacytidine-induced protein 2	2	0	0	1	2	1	2	4	261.919	273.662	189.708	152.651	123.514	135.201	266.192	210.699	177.34	164.888	186.266	286.856	280.025	134.983	92.0163	88.7076	0	0	0	0	0	0	0	0	0	0	0	0	0	0	0	0	329.469	435.939	460.08	332.085
sp|P61769|B2MG_HUMAN	sp	P61769	HUMAN	B2M	Beta-2-microglobulin	2	3	1	0	7	5	4	6	488.845	445.802	433.129	424.706	354.543	365.058	453.33	417.385	447.886	419.772	420.61	524.647	455.667	458.014	471.055	620.317	237.163	248.82	207.466	178.318	146.932	136.793	222.49	199.479	207.755	204.967	196.998	230.233	216.074	212.766	267.914	510.583	1634.37	1767.22	2288.55	1567.17
sp|O94766|B3GA3_HUMAN	sp	O94766	HUMAN	B3GAT3	Galactosylgalactosylxylosylprotein 3-beta-glucuronosyltransferase 3	1	0	0	1	0	5	2	1	125.07	129.838	132.273	128.831	122.202	138.624	136.14	135.041	120.453	124.725	125.673	103.937	134.596	153.944	118.267	131.301	0	0	0	0	0	0	0	0	0	0	0	0	0	0	0	0	0	0	0	0
sp|Q6Y288|B3GLT_HUMAN	sp	Q6Y288	HUMAN	B3GLCT	Beta-1,3-glucosyltransferase	8	8	1	0	8	3	4	7	626.069	624.039	631.095	641.786	650.421	578.532	652.663	619.94	607.896	583.237	582.392	640.988	650.829	671.767	672.392	662.424	332.664	343.026	355.691	378.065	342.666	367.436	385.144	352.337	353.371	391.499	364.338	347.326	340.911	346.01	348.454	351.555	1839.67	1753.76	1770.88	1662.62
sp|O60513|B4GT4_HUMAN	sp	O60513	HUMAN	B4GALT4	Beta-1,4-galactosyltransferase 4	1	6	1	0	5	6	6	8	162.894	175.35	133.84	111.922	96.8942	94.8795	163.039	145.327	112.526	108.901	107.659	157.03	155.713	142.754	109.569	114.776	199.854	271.42	216.266	160.396	152.135	134.132	244.533	202.972	174.808	165.768	164.304	245.96	235.019	222.916	205.551	192.294	827.93	779.186	703.546	860.237
sp|Q9UBV7|B4GT7_HUMAN	sp	Q9UBV7	HUMAN	B4GALT7	Beta-1,4-galactosyltransferase 7	1	1	1	0	2	3	3	3	59.4342	49.594	52.5827	49.3831	50.0014	49.9671	50.5709	54.0242	52.039	56.1435	50.6716	41.4065	53.3895	55.5985	44.1137	57.254	19.8236	18.0268	17.8098	14.3451	14.8041	15.9994	15.0492	13.8702	17.2762	11.7922	18.8724	12.6845	15.1709	14.6179	13.8176	16.4838	239.258	215.71	221.848	215.158
sp|O43505|B4GA1_HUMAN	sp	O43505	HUMAN	B4GAT1	Beta-1,4-glucuronyltransferase 1	1	2	1	0	2	2	1	3	94.1051	81.9143	83.8124	72.6999	73.1654	64.2324	67.3074	79.8397	73.7452	69.3314	63.3512	77.801	71.2401	87.4273	65.1951	60.3159	27.084	47.707	30.4918	26.3999	20.7677	23.2268	38.5884	31.3366	23.3499	29.6056	22.9434	35.6679	36.2912	28.2059	26.9189	34.4638	153.809	151.775	168.514	161.207
sp|Q9NWV8|BABA1_HUMAN	sp	Q9NWV8	HUMAN	BABAM1	BRISC and BRCA1-A complex member 1	3	7	1	0	12	10	12	9	180.819	174.219	160.44	165.516	166.369	159.497	168.092	162.23	162.56	171.65	159.045	177.085	181.023	186.524	173.766	164.438	575.629	524.606	572.72	529.031	509.432	491.437	557.478	535.744	542.411	541.609	501.52	567.764	579.15	575.948	535.342	509.831	1155.3	1274.49	1220.22	1120.85
sp|O14867|BACH1_HUMAN	sp	O14867	HUMAN	BACH1	Transcription regulator protein BACH1	4	2	1	0	10	16	11	11	233.748	220.395	191.345	233.127	214.156	203.48	243.936	224.676	238.399	251.206	299.502	265.749	235.013	249.69	207.267	296.062	85.9084	70.0301	83.622	88.8785	68.5012	76.0301	79.0585	86.1388	93.2316	101.151	105.536	84.381	96.321	94.9293	108.093	120.408	1139.67	1242.02	1120.09	1104.89
sp|Q92934|BAD_HUMAN	sp	Q92934	HUMAN	BAD	Bcl2-associated agonist of cell death	1	1	1	0	8	6	6	4	21.6161	21.2281	20.6058	22.5498	21.2027	19.7238	25.8804	19.9129	23.1585	26.078	25.8019	21.4089	17.8175	22.6377	24.2905	26.41	28.8803	28.1218	25.62	26.2459	24.1054	30.3382	25.3847	27.8608	25.465	25.4432	21.0623	26.7063	26.3333	32.7829	26.4813	25.4002	1314.32	1288.91	1255.69	1296.06
sp|Q99933|BAG1_HUMAN	sp	Q99933	HUMAN	BAG1	BAG family molecular chaperone regulator 1	5	2	1	0	2	4	3	0	787.951	768.762	715.237	735.255	722.697	690.035	808.216	748.661	729.743	713.58	754.404	821.586	834.242	751.031	818.626	909.152	134.077	125.928	120.39	123.183	127.213	130.231	126.753	124.931	125.386	130.588	127.228	138.488	128.188	144.006	148.304	192.813	306.37	324.852	305.962	307.528
sp|O95816|BAG2_HUMAN	sp	O95816	HUMAN	BAG2	BAG family molecular chaperone regulator 2	27	29	1	0	19	20	22	23	3654.98	3286.28	3306.3	3328.12	3275.69	3584.24	3357.34	3320.03	3413.89	3419.7	3615.55	3546.86	3566.67	3474.36	3706.5	3803.29	2501.16	2396.59	2286.01	2267.21	2382.02	2772.02	2310.14	2255.44	2254.16	2411.74	2624.07	2367.03	2381.54	2407.82	2425.9	2286.19	3117.03	3146.84	3556.92	2983.51
sp|O95817|BAG3_HUMAN	sp	O95817	HUMAN	BAG3	BAG family molecular chaperone regulator 3	22	27	1	0	36	37	38	43	2457.33	2416.84	2383.08	2310.86	2229.23	2152.19	2511.8	2391.64	2399.18	2454.57	2601.74	2540.01	2480.6	2450.39	2525.96	2582.46	2393.67	2209.45	2211.37	2101.21	2162.68	2221.85	2193.69	2194.97	2281.73	2258.74	2468.11	2400.17	2379.4	2391.29	2328.09	2122.71	5157.05	5676.93	5387.23	4837.17
sp|O95429|BAG4_HUMAN	sp	O95429	HUMAN	BAG4	BAG family molecular chaperone regulator 4	2	1	1	0	6	2	3	2	99.349	98.4231	91.2061	92.5809	89.4777	98.142	102.909	97.3743	107.002	101.367	115.867	108.538	101.808	108.72	94.2176	116.069	49.6058	43.4445	46.644	38.608	35.0495	37.3633	47.1404	44.696	40.8811	36.9402	37.2358	43.7915	46.9238	43.6712	51.1083	43.7914	955.857	835.149	926.179	794.071
sp|Q9UL15-2|BAG5_HUMAN	sp	Q9UL15-2	HUMAN	BAG5	Isoform 2 of BAG family molecular chaperone regulator 5	8	5	1	0	9	11	8	7	534.749	561.637	592.509	524.081	517.118	518.04	535.278	543.876	547.962	538.101	564.533	571.381	532.96	539.08	558.004	558.273	426.826	442.438	469.378	440.955	422.275	400.662	447.591	445.983	423.823	445.865	428.1	462.389	437.49	434.125	418.158	442.865	1899.18	1824.43	1780.9	1699.74
sp|P46379-3|BAG6_HUMAN	sp	P46379-3	HUMAN	BAG6	Isoform 3 of Large proline-rich protein BAG6	6	8	1	0	9	13	12	5	1143.34	1136.36	1011.6	919.2	868.15	830.497	1131.79	1004.6	881.529	858.078	809.973	1226.6	1098.16	974.157	913.617	996.182	1030.6	981.155	971.601	929.672	871.079	929.816	1074.34	935.56	922.362	913.112	854.635	1124.02	1089.38	1000.93	1015.08	967.841	1100.4	1116.02	1099.26	1112.26
sp|Q8TBE0|BAHD1_HUMAN	sp	Q8TBE0	HUMAN	BAHD1	Bromo adjacent homology domain-containing 1 protein	0	1	0	1	0	3	0	1	0	0	0	0	0	0	0	0	0	0	0	0	0	0	0	0	17.3175	12.7318	16.1988	13.7639	14.4967	12.7425	16.1489	14.8735	17.0204	10.5041	16.7325	15.0179	12.3173	13.3917	15.6934	16.3669	0	0	0	0
sp|Q9UQB8|BAIP2_HUMAN	sp	Q9UQB8	HUMAN	BAIAP2	Brain-specific angiogenesis inhibitor 1-associated protein 2	10	11	1	0	19	15	11	13	1375.56	1251.1	1262.83	1124.52	1071.13	1053.6	1293.43	1212.93	1188.48	1039.44	998.842	1356.19	1357.06	1326.08	1274.94	1235.91	806.153	774.933	728.221	684.518	650.62	555.701	828.779	752.67	629.852	614.657	544.898	811.366	805.655	798.918	758.602	640.728	3866.31	3784.9	3511.82	3809.33
sp|Q9UHR4|BI2L1_HUMAN	sp	Q9UHR4	HUMAN	BAIAP2L1	Brain-specific angiogenesis inhibitor 1-associated protein 2-like protein 1	7	2	1	0	5	10	9	9	1025.91	1010.91	1055.18	1012.23	1069.22	927.254	1005.17	1022.05	984.823	956.054	942.226	1055.34	1059.48	975.386	923.927	877.242	66.8566	108.533	88.4441	99.5511	104.676	93.8663	109.488	94.432	103.216	106.03	76.481	93.7785	83.0722	75.4786	80.1919	79.3326	1138.92	1292.53	1237.15	1333.68
sp|O75531|BAF_HUMAN	sp	O75531	HUMAN	BANF1	Barrier-to-autointegration factor	29	17	1	0	15	21	20	22	3401.54	3374.38	3337.96	3321.33	3306.82	3594.31	3177.2	3394.16	3216.78	3129.38	3385.73	3557.96	3490.79	3787.67	3426.3	3535.09	2101.84	1742.81	1978.78	2033.22	2061.67	2229.97	1853.28	2015.82	2018.36	1975.97	2092.78	2010.1	1934.53	2236.99	1958.64	1882.55	3310.17	3062.66	2589.86	3172.95
sp|Q92560|BAP1_HUMAN	sp	Q92560	HUMAN	BAP1	Ubiquitin carboxyl-terminal hydrolase BAP1	6	3	1	0	2	5	3	5	805.149	751.393	681.206	686.505	662.206	618.706	715.544	654.677	601.932	534.613	508.796	827.777	761.9	664.655	607.853	618.286	94.9876	87.689	68.2907	74.3771	83.093	78.6585	90.2518	83.5566	59.571	68.8835	56.1654	94.0499	87.6968	85.4608	89.6728	84.1868	211.544	144.398	168.991	151.463
sp|Q8IXM2-3|BAP18_HUMAN	sp	Q8IXM2-3	HUMAN	BAP18	Isoform 3 of Chromatin complexes subunit BAP18	7	7	1	0	9	2	4	5	585.342	578.833	580.959	538.047	525.469	490.585	593.099	565.414	537.119	546.749	469.976	609.3	597.525	598.169	571.043	562.069	463.498	462.598	422.882	397.313	392.164	383.893	433.245	423.715	410.27	407.509	409.342	470.314	450.963	474.543	469.985	434.132	1401.49	1320.13	1470.69	1267.24
sp|Q99728|BARD1_HUMAN	sp	Q99728	HUMAN	BARD1	BRCA1-associated RING domain protein 1	2	2	1	0	6	0	3	2	118.075	118.284	102.744	89.7793	92.2426	86.464	112.412	105.873	97.7537	88.3422	80.2659	113.214	112.541	107.21	88.6508	61.3551	54.3437	63.5427	51.1147	53.3403	44.8941	29.3918	62.0109	50.4143	55.3765	40.6318	37.2631	54.9186	53.6621	42.9199	58.9092	60.4683	637.507	639.539	518.11	635.112
sp|P80723|BASP1_HUMAN	sp	P80723	HUMAN	BASP1	Brain acid soluble protein 1	25	35	1	0	36	24	26	36	4741.76	4218.33	4375.95	4345.02	4260.13	4475.07	4242.98	4321.39	4313.05	4259.09	4558.99	4565.55	4628.71	4753.73	4942.02	5425.29	5756.6	5917.48	5430.46	5343.59	5241.05	5132.11	5294.4	5315.2	5300.95	5244.63	5265.14	5584.03	5486.42	5555.04	5446.15	5714.47	9046.99	8741.14	9297.85	9307.91
sp|Q07812-2|BAX_HUMAN	sp	Q07812-2	HUMAN	BAX	Isoform Beta of Apoptosis regulator BAX	12	12	1	0	8	9	8	5	1621.07	1407.56	1379.45	1415.65	1434.49	1419.09	1410.71	1385.16	1449.08	1530.06	1535.31	1337.58	1494.99	1442.54	1612.75	1452.71	830.263	818.129	814.516	826.661	842.72	764.842	813.106	816.012	806.94	801.792	715.33	855.548	867.018	824.882	802.905	778.687	1562.16	1433.41	1331.31	1373.3
sp|Q9NRL2|BAZ1A_HUMAN	sp	Q9NRL2	HUMAN	BAZ1A	Bromodomain adjacent to zinc finger domain protein 1A	15	9	1	0	8	14	19	13	1052.8	1269.43	1236.75	1200.66	1192.72	1058.24	1285.54	1189.82	1245.52	1282.59	1200.1	1256.06	1181.19	1057.83	1121.27	1107.72	595.365	662.764	584.983	659.623	633.286	678.647	684.99	665.174	674.64	679.276	710.465	640.658	660.677	627.818	892.83	999.839	1412.15	1463.33	1251.76	1483.92
sp|Q9UIG0|BAZ1B_HUMAN	sp	Q9UIG0	HUMAN	BAZ1B	Tyrosine-protein kinase BAZ1B	50	33	1	0	42	39	47	38	4393.29	4536.28	4394.21	4313.23	4231.75	3931.93	4499.89	4211.07	4261.37	4317.3	3972.08	4590.7	4519.96	3781.14	3599.51	3280.57	2418.34	2300.23	2266.35	2295.24	2215.51	2132.16	2421.68	2266.27	2280.22	2172.34	2180.29	2484.92	2415.49	2339.73	2220.72	2005.03	7949.14	8490.1	8150.61	8051.19
sp|Q9UIF9|BAZ2A_HUMAN	sp	Q9UIF9	HUMAN	BAZ2A	Bromodomain adjacent to zinc finger domain protein 2A	2	3	1	0	8	12	11	11	47.3485	46.4664	40.0794	31.4173	25.0995	29.4862	48.8666	44.7306	40.1175	31.8504	32.046	49.1186	50.0324	40.0465	34.0554	49.6749	119.239	102.203	88.2675	99.4379	93.3632	82.3303	112.959	93.3539	106.269	71.8463	68.9057	111.225	109.112	116.174	124.55	152.388	901.802	1049.79	985.496	925.754
sp|Q9UIF8|BAZ2B_HUMAN	sp	Q9UIF8	HUMAN	BAZ2B	Bromodomain adjacent to zinc finger domain protein 2B	1	0	0	1	1	1	2	1	252.754	284.041	246.639	267.413	266.74	268.463	236.431	294.135	312.054	233.955	277.13	263.216	277.605	286.088	246.985	282.62	0	0	0	0	0	0	0	0	0	0	0	0	0	0	0	0	82.4173	75.2078	92.8802	91.2138
sp|A8MTZ0|BBIP1_HUMAN	sp	A8MTZ0	HUMAN	BBIP1	BBSome-interacting protein 1	1	0	0	1	1	0	0	1	22.3833	20.6997	15.2026	13.0511	10.8096	10.5537	19.9036	23.6093	17.0368	9.25896	10.732	24.6057	22.0914	16.5221	11.4129	10.2524	0	0	0	0	0	0	0	0	0	0	0	0	0	0	0	0	187.566	189.891	177.7	181.064
sp|Q8IWZ6|BBS7_HUMAN	sp	Q8IWZ6	HUMAN	BBS7	Bardet-Biedl syndrome 7 protein	0	2	0	1	3	1	1	1	0	0	0	0	0	0	0	0	0	0	0	0	0	0	0	0	95.1545	66.1363	66.3986	56.8831	50.1593	69.8775	66.9933	69.4588	63.2547	56.2466	72.6344	89.4362	72.1044	89.2379	85.2502	71.1896	236.436	236.77	223.793	206.94
sp|Q8WY36|BBX_HUMAN	sp	Q8WY36	HUMAN	BBX	HMG box transcription factor BBX	3	6	1	0	11	11	10	8	113.12	104.738	101.826	80.5182	81.8712	78.8128	116.967	99.4604	89.2451	80.5986	75.9328	113.767	110.308	82.8967	75.0468	70.5216	240.525	190.912	180.763	172.912	161.82	139.257	206.567	184.592	181.941	165.709	147.496	229.165	214.829	205.597	254.911	226.174	1644.18	1573.89	1647.91	1596.26
sp|P50895|BCAM_HUMAN	sp	P50895	HUMAN	BCAM	Basal cell adhesion molecule	1	3	1	0	9	10	8	5	22.7738	22.1129	10.795	10.569	18.1802	17.3451	16.6559	14.1705	15.3261	14.5902	16.5703	13.7547	14.6133	15.247	19.1866	16.3727	134.674	224.836	184.849	183.124	170.641	178.32	150.998	176.784	192.809	221.449	215.813	141.039	155.149	160.476	152.292	139.865	1223.28	1018.18	1227.64	1189.51
sp|Q9UHQ4|BAP29_HUMAN	sp	Q9UHQ4	HUMAN	BCAP29	B-cell receptor-associated protein 29	8	3	1	0	12	14	16	14	886.665	899.756	852.997	805.401	782.047	829.09	867.034	911.304	855.87	797.309	760.909	700.591	864.317	933.579	864.095	787.646	480.335	542.508	436.067	464.127	423.73	425.346	487.034	492.489	457.152	453.951	442.1	477.613	487.395	449.336	473.269	519.281	1933.58	2033.78	2168.81	2162.97
sp|P51572-2|BAP31_HUMAN	sp	P51572-2	HUMAN	BCAP31	Isoform 2 of B-cell receptor-associated protein 31	29	25	1	0	34	23	28	40	4801.21	4467.46	4751.32	4484.56	4363.6	4669.38	4404.79	4630.16	4631.74	4353.65	4499.09	3502.56	4451.35	4738.55	4586.23	4606.55	2551.82	2447.57	2527.63	2552.75	2542.97	2500.48	2578.22	2463.06	2655.69	2641.51	2682.01	2661.6	2595.85	2604.2	2462.2	2654.23	8771.22	8043.08	8591.42	8972.21
sp|P56945-6|BCAR1_HUMAN	sp	P56945-6	HUMAN	BCAR1	Isoform 6 of Breast cancer anti-estrogen resistance protein 1	8	11	1	0	19	20	15	21	538.071	535.764	507.525	470.837	408.929	351.011	564.426	489.856	475.016	458.164	387.304	572.969	541.394	459.467	435.834	427.172	518.717	591.787	522.097	462.586	413.364	351.498	568.85	507.971	472.561	418.293	364.118	581.522	590.785	579.354	524.424	572.768	2473.03	2924.1	2526.49	2829.54
sp|O75815|BCAR3_HUMAN	sp	O75815	HUMAN	BCAR3	Breast cancer anti-estrogen resistance protein 3	5	5	1	0	4	10	8	11	480.654	505.248	447.162	359.409	317.705	246.707	499.346	456.691	403.516	402.996	358.448	539.693	503.402	433.146	418.033	471.001	178.784	102.831	118.74	104.997	101.774	99.3766	146.835	136.263	113.735	107.947	111.607	149.905	168.835	160.6	179.072	182.794	520.196	518.766	591.845	558.368
sp|O75934|SPF27_HUMAN	sp	O75934	HUMAN	BCAS2	Pre-mRNA-splicing factor SPF27	24	10	1	0	7	9	16	6	1311.24	1416.43	1392.56	1288.47	1368.47	1322.82	1379.5	1335.02	1329.48	1377.84	1394.06	1378.34	1363.04	1332.58	1350.14	1280.12	537.362	538.552	499.05	525.879	539.153	562.19	529.212	545.018	514.24	534.744	571.311	509.149	535.983	514.32	505.589	509.505	1754.43	1647.01	1551.27	1627.05
sp|Q9H6U6-7|BCAS3_HUMAN	sp	Q9H6U6-7	HUMAN	BCAS3	Isoform 5 of Breast carcinoma-amplified sequence 3	3	1	1	0	12	8	4	12	322.604	319.764	322.076	272.414	281.209	311.605	369.553	316.587	290.099	309.546	280.727	315.902	320.661	299.106	305.299	340.442	97.0343	103.848	76.4393	95.1084	65.6482	105.281	86.9258	88.5089	91.1248	78.4646	94.603	85.1894	94.7267	92.5355	102.207	90.024	1496.25	1622.09	1660.55	1574.87
sp|Q8TDM0|BCAS4_HUMAN	sp	Q8TDM0	HUMAN	BCAS4	Breast carcinoma-amplified sequence 4	0	1	0	1	1	2	0	2	0	0	0	0	0	0	0	0	0	0	0	0	0	0	0	0	16.4319	19.053	13.7847	15.8771	12.4324	17.4508	19.2219	17.3592	16.5514	13.5899	9.50599	18.5702	20.75	16.202	19.8648	11.455	63.1538	65.1175	73.6661	66.7783
sp|P54687-5|BCAT1_HUMAN	sp	P54687-5	HUMAN	BCAT1	Isoform 5 of Branched-chain-amino-acid aminotransferase, cytosolic	19	21	1	0	27	20	23	12	3071.59	2917.59	2884.38	2856.27	2777.74	2712.87	2910.59	2889.82	2861.21	2751.26	2722.55	2955.92	2988.72	3034.42	3069.38	3061.11	1689.63	1519.87	1589.56	1703.28	1747.15	1718.09	1592.65	1516.13	1566.3	1544.95	1466.53	1538.65	1658.41	1598.23	1646.15	1559.3	4215.5	4620.55	4379.21	4145.02
sp|P54687|BCAT1_HUMAN	sp	P54687	HUMAN	BCAT1	Branched-chain-amino-acid aminotransferase, cytosolic	0	1	0	1	1	1	1	2	0	0	0	0	0	0	0	0	0	0	0	0	0	0	0	0	225.514	246.651	187.148	167.354	149.916	124.871	176.045	185.927	166.523	133.765	112.559	225.743	203.926	236.286	204.901	165.54	84.2792	96.5597	84.5062	96.1411
sp|O15382|BCAT2_HUMAN	sp	O15382	HUMAN	BCAT2	Branched-chain-amino-acid aminotransferase, mitochondrial	3	7	1	0	8	15	13	9	162.486	171.449	164.882	150.347	139.856	160.531	154.057	159.52	142.123	161.814	146.602	165.452	163.374	165.042	166.191	172.14	375.193	387.289	406.548	407.504	388.049	385.067	395.19	383.512	396.853	419.023	459.921	369.591	395.039	365.479	363.913	381.142	1276.85	1369.43	1283.49	1225.5
sp|Q9P287|BCCIP_HUMAN	sp	Q9P287	HUMAN	BCCIP	BRCA2 and CDKN1A-interacting protein	4	3	1	0	5	2	3	2	303.255	328.046	321.314	306.6	306.272	272.835	334.689	347.165	321.027	337.737	325.758	333.022	337.523	320.325	320.658	300.901	321.672	326.366	330.418	317.084	337.21	327.347	340.643	359.216	361.939	339.761	309.951	355.71	340.723	336.306	314.729	242.654	623.21	669.377	595.381	617.192
sp|Q9P287-2|BCCIP_HUMAN	sp	Q9P287-2	HUMAN	BCCIP	Isoform 2 of BRCA2 and CDKN1A-interacting protein	23	15	1	0	13	9	11	12	3039.75	3191.6	3093.09	2954.39	3164.08	2820.19	3265.55	3138.37	2935.91	3020.51	2965.93	3308.21	3187.92	3137.37	3025.77	2771.26	2065.81	2023.21	2076.31	2063.56	2069.97	1925.29	2151.3	2152.91	2113.01	2033.75	1930.43	2130.51	2074.49	2030.74	1918.02	1602.08	2051.9	2009.79	1962.76	1893.01
sp|P12694|ODBA_HUMAN	sp	P12694	HUMAN	BCKDHA	2-oxoisovalerate dehydrogenase subunit alpha, mitochondrial	2	6	1	0	5	8	2	6	53.2621	57.5219	52.3766	51.1267	51.1678	50.0658	56.8394	49.4236	50.0311	51.4989	47.0025	51.0799	52.2869	54.6722	56.3198	56.6306	496.95	444.514	435.136	401.828	402.522	469.816	449.445	450.999	462.373	439.987	443.684	484.991	490.107	464.528	478.658	426.394	585.676	647.723	674.52	603.663
sp|P21953|ODBB_HUMAN	sp	P21953	HUMAN	BCKDHB	2-oxoisovalerate dehydrogenase subunit beta, mitochondrial	4	5	1	0	12	7	5	7	562.196	516.058	545.856	531.405	514.376	523.146	541.124	558.652	530.288	529.018	542.2	553.53	543.261	565.722	587.119	552.19	671.937	575.688	666.417	589.6	608.363	599.776	621.913	613.571	606.367	600.675	609.957	627.131	663.022	636.483	668.184	641.054	1214.5	1247.11	1338.18	1229.27
sp|O14874|BCKD_HUMAN	sp	O14874	HUMAN	BCKDK	[3-methyl-2-oxobutanoate dehydrogenase [lipoamide]] kinase, mitochondrial	1	2	1	0	2	1	2	1	29.9323	28.0125	26.2005	18.953	13.1635	13.6219	30.3343	27.4115	24.0839	22.4424	16.6286	41.6415	28.2385	31.5355	28.3452	20.6958	119.718	79.8927	96.8652	75.9649	65.5056	64.5471	89.567	93.8825	81.2056	86.5102	76.0031	110.135	103.24	119.276	108.301	106.945	400.14	401.472	410.387	383.199
sp|O95999|BCL10_HUMAN	sp	O95999	HUMAN	BCL10	B-cell lymphoma/leukemia 10	7	5	1	0	3	6	4	4	571.32	543.392	562.126	556.609	507.519	553.575	577.118	580.121	762.92	902.909	925.494	582.15	579.479	546.563	628.247	735.153	136.556	133.925	141.933	128.281	128.462	131.569	138.078	135.673	178.868	195.236	200.661	154.291	145.023	133.71	147.683	168.16	398.061	364.069	338.529	321.452
sp|Q07817|B2CL1_HUMAN	sp	Q07817	HUMAN	BCL2L1	Bcl-2-like protein 1	2	2	1	0	2	1	1	0	185.211	198.005	170.191	181.004	168.561	173.489	187.678	184.275	176.605	147.686	150.012	186.985	201.482	187.471	163.547	176.805	137.082	148.801	123.408	133.923	132.138	187.205	150.008	126.289	156.716	134.926	110.274	139.603	141.429	132.268	151.03	134.448	217.763	249.27	213.317	236.124
sp|Q9HB09|B2L12_HUMAN	sp	Q9HB09	HUMAN	BCL2L12	Bcl-2-like protein 12	2	1	1	0	2	3	2	0	53.0544	55.9792	66.0695	56.696	53.2198	52.483	59.3258	53.0636	60.5256	52.4238	48.3921	56.3454	53.8381	58.9281	50.5784	47.5067	85.5665	126.542	106.082	109.276	101.468	74.7146	119.039	109.765	104.961	99.9349	79.428	108.247	104.06	89.2741	81.0763	79.7869	407.871	350.557	371.736	376.183
sp|Q9BXK5|B2L13_HUMAN	sp	Q9BXK5	HUMAN	BCL2L13	Bcl-2-like protein 13	3	5	1	0	7	6	5	10	231.877	216.918	201.425	218.103	219.894	234.688	202.221	217.988	233.391	243.539	249.089	199.502	223.03	254.754	265.81	333.964	346.135	325.674	330.623	332.169	328.682	295.718	329.919	326.337	345.109	377.812	381.814	329.983	369.797	387.134	495.923	693.873	789.247	886.468	934.201	866.29
sp|Q92843-2|B2CL2_HUMAN	sp	Q92843-2	HUMAN	BCL2L2	Isoform 3 of Bcl-2-like protein 2	19	18	1	0	22	16	15	17	1801.56	1786.1	1690.81	1725.24	1836.88	1794.49	1771.61	1741.36	1711.15	1674.89	1733.41	1925.42	1829.23	1748.86	1754.54	1865.26	2354.34	2181.06	2138.53	2140.11	2251.16	2274.63	2205.49	2212.25	2142.76	2129.23	2027.16	2304.01	2309.06	2259.19	2199.28	2115.96	2354.67	2261.95	2491.47	2214.96
sp|Q9BQE9|BCL7B_HUMAN	sp	Q9BQE9	HUMAN	BCL7B	B-cell CLL/lymphoma 7 protein family member B	3	0	0	1	1	2	2	2	214.543	203.343	196.335	190.374	196.343	173.041	201.506	205.968	192.999	200.355	162.894	211.24	217.293	219.508	211.26	218.919	0	0	0	0	0	0	0	0	0	0	0	0	0	0	0	0	369.185	363.489	314.192	327.926
sp|Q8WUZ0|BCL7C_HUMAN	sp	Q8WUZ0	HUMAN	BCL7C	B-cell CLL/lymphoma 7 protein family member C	2	0	0	1	7	4	3	1	102.346	93.6148	101.519	94.2158	86.4846	91.4194	99.5474	84.0323	84.1093	87.3934	93.2572	110.177	99.1148	97.4791	97.9945	90.6628	0	0	0	0	0	0	0	0	0	0	0	0	0	0	0	0	789.837	746.713	772.41	645.083
sp|Q86UU0|BCL9L_HUMAN	sp	Q86UU0	HUMAN	BCL9L	B-cell CLL/lymphoma 9-like protein	5	3	1	0	14	10	15	9	226.442	144.008	191.014	202.82	198.062	183.36	132.993	147.337	202.91	206.16	181.965	227.356	187.803	159.224	193.921	222.081	103.69	105.583	96.7272	89.5592	77.5432	76.2854	95.4957	91.4109	83.0505	71.6787	67.0202	101.599	102.472	102.239	93.4885	80.4822	2702.74	2672.64	2496.94	2451.73
sp|Q9NYF8|BCLF1_HUMAN	sp	Q9NYF8	HUMAN	BCLAF1	Bcl-2-associated transcription factor 1	22	13	1	0	26	38	37	38	1791.37	1596.41	1595.33	1670.53	1761.15	1913.49	1563.28	1571.54	1742.86	1814.8	1880.38	1654.78	1710.74	1821.25	1848.61	1970.12	916.305	868.374	870.638	937.311	1052.16	1014.22	847.545	849.677	881.546	960.082	969.117	864.226	897.058	929.252	928.212	972.8	4610.29	4064.76	4322.55	4024.85
sp|Q6W2J9|BCOR_HUMAN	sp	Q6W2J9	HUMAN	BCOR	BCL-6 corepressor	1	0	0	1	3	2	1	4	48.869	47.3582	41.9214	27.1353	23.8242	23.3959	48.0378	32.6193	38.1395	29.4903	23.6972	69.3631	50.9169	34.9687	34.4251	41.177	0	0	0	0	0	0	0	0	0	0	0	0	0	0	0	0	443.492	426.602	463.051	423.475
sp|Q5H9F3-3|BCORL_HUMAN	sp	Q5H9F3-3	HUMAN	BCORL1	Isoform 3 of BCL-6 corepressor-like protein 1	0	1	0	1	3	0	0	1	0	0	0	0	0	0	0	0	0	0	0	0	0	0	0	0	60.887	73.3418	69.3328	55.9248	55.9597	52.9921	62.4965	70.6897	72.4445	64.2054	61.012	67.1805	62.8335	66.0113	66.6731	60.9575	989.401	856.209	943.819	893.512
sp|P11274|BCR_HUMAN	sp	P11274	HUMAN	BCR	Breakpoint cluster region protein	5	10	1	0	16	16	13	12	273.217	241.465	224.993	227.333	241.599	238.742	245.413	231.974	238.281	216.818	232.737	229.175	247.979	236.938	239.956	250.517	977.441	855.718	899.572	876.942	882.819	882.857	902.59	863.201	878.039	883.228	854.942	866.993	888.631	894.954	910.04	903.586	2515.92	2429.59	2576.86	2435.14
sp|Q9Y276|BCS1_HUMAN	sp	Q9Y276	HUMAN	BCS1L	Mitochondrial chaperone BCS1	1	2	1	0	3	7	2	2	53.854	56.8498	44.7978	44.2386	47.1706	53.9344	59.1675	59.7774	51.5468	58.3949	47.8504	61.2816	58.1591	59.0758	62.4132	64.5931	41.8111	38.5695	41.7329	38.1	35.3971	41.604	39.818	39.5681	46.0344	36.4351	45.7862	38.8356	36.6294	44.1957	34.5227	43.9309	276.297	279.429	282.68	277.542
sp|Q9BUT1|BDH2_HUMAN	sp	Q9BUT1	HUMAN	BDH2	3-hydroxybutyrate dehydrogenase type 2	4	3	1	0	7	6	8	7	371.983	343.834	330.629	350.823	316.475	339.819	346.871	329.216	340.169	322.281	356.349	346.551	355.95	394.599	393.611	387.581	187.826	173.303	171.492	167.384	153.729	179.333	169.524	169.757	160.225	177.32	180.343	171.923	180.834	200.972	195.316	238.377	963.771	946.464	954.649	932.664
sp|Q14457|BECN1_HUMAN	sp	Q14457	HUMAN	BECN1	Beclin-1	5	4	1	0	5	11	8	10	898.969	838.329	803.007	796.161	734.496	806.278	874.849	799.123	780.452	753.8	752.051	873.168	811.38	807.514	800.843	811.747	152.798	147.503	167.61	154.633	123.693	141.903	163.093	153.164	124.771	127.549	118.412	160.804	158.453	147.915	140.512	131.324	557.692	658.478	604.388	661.175
sp|Q5T5X7|BEND3_HUMAN	sp	Q5T5X7	HUMAN	BEND3	BEN domain-containing protein 3	5	2	1	0	2	3	2	3	189.834	207.782	185.269	194.67	187.877	179.332	199.067	178.827	174.046	166.272	149.808	200.949	197.509	193.162	185.898	153.544	47.4681	41.0854	50.5734	46.9729	47.9289	44.5329	46.9873	43.3222	45.069	39.3517	37.5462	46.9209	48.2341	42.0412	39.0656	32.898	209.308	233.295	197.772	204.708
sp|O15155|BET1_HUMAN	sp	O15155	HUMAN	BET1	BET1 homolog	4	4	1	0	2	4	3	5	686.14	642.228	683.852	655.106	625.032	655.736	635.153	675.532	688.718	679.473	718.72	590.389	640.698	700.953	680.313	727.567	372.221	354.143	392.516	383.617	373.399	331.631	456.154	385.577	371.527	393.789	358.382	398.29	382.913	411.459	389.165	463.861	218.557	225.332	283.801	199.191
sp|Q9NYM9|BET1L_HUMAN	sp	Q9NYM9	HUMAN	BET1L	BET1-like protein	1	1	1	0	1	2	3	4	30.8703	21.6735	16.1084	15.7277	15.4009	19.3093	25.2986	22.8922	19.2233	11.9815	20.3404	15.8516	27.5197	27.8623	26.3189	20.7693	59.7933	71.4642	62.4114	61.3649	47.3814	41.4381	68.0159	55.5488	60.1942	53.5778	40.7516	74.4514	59.2613	75.1788	57.4715	44.3048	213.874	201.898	206.255	176.219
sp|P21810|PGS1_HUMAN	sp	P21810	HUMAN	BGN	Biglycan	2	2	1	0	11	10	8	9	77.7734	60.8726	30.645	31.0081	17.4326	25.0033	57.9338	33.8775	36.3442	31.2159	26.2457	72.1651	48.3842	34.2374	32.6308	24.6895	218.891	127.18	79.7046	60.7569	40.003	58.8633	141.535	78.4658	63.6006	62.0549	63.4944	242.2	243.084	213.135	201.641	210.121	1847.24	1517.99	1556.15	1644.34
sp|Q9H694|BICC1_HUMAN	sp	Q9H694	HUMAN	BICC1	Protein bicaudal C homolog 1	5	7	1	0	18	13	11	13	979.402	868	786.964	646.529	520	478.391	881.623	761.257	684.14	596.833	526.694	984.075	863.932	739.275	673.399	807.085	590.004	517.342	489.473	418.722	339.893	361.978	512.744	480.589	415.653	386.943	364.467	526.565	571.838	577.155	581.034	447.301	2720.7	2764.93	2591.76	2647.81
sp|Q96G01|BICD1_HUMAN	sp	Q96G01	HUMAN	BICD1	Protein bicaudal D homolog 1	4	2	1	0	6	11	10	11	146.525	169.959	141.938	135.409	124.819	106.41	157.531	178.586	136.927	148.727	135.904	160.742	158.331	134.296	121.702	105.195	73.7867	90.6047	69.2027	69.8897	61.1489	60.6108	80.8127	73.9894	74.912	65.0431	65.1099	70.4441	89.4352	84.4518	76.298	62.7779	748.88	616.636	568.443	658.776
sp|Q8TD16-2|BICD2_HUMAN	sp	Q8TD16-2	HUMAN	BICD2	Isoform 2 of Protein bicaudal D homolog 2	15	15	1	0	21	23	25	29	2144.35	2307.23	2068.69	1994.47	1935.01	1738.52	2245.14	2168.52	2112.24	2029.62	2005.16	2391.86	2325.83	2015.19	1802.39	1600.87	1401.4	1431.13	1293.33	1294.85	1337.67	1245.81	1439.15	1363.02	1353.66	1279.07	1178.22	1414.62	1435.44	1399.57	1308.85	1031.25	3080.12	3145.07	2912.76	3107.8
sp|P55957-2|BID_HUMAN	sp	P55957-2	HUMAN	BID	Isoform 2 of BH3-interacting domain death agonist	2	4	1	0	5	9	4	9	113.702	118.737	114.269	109.498	117.952	97.4056	109.796	101.197	89.2463	98.702	92.3851	120.111	110.148	114.006	109.408	114.749	455.959	403.888	403.738	372.172	369.274	429.885	432.585	395.131	393.704	378.877	351.234	426.634	398.908	417.745	434.032	460.53	578.545	618.864	793.267	567.391
sp|O00499|BIN1_HUMAN	sp	O00499	HUMAN	BIN1	Myc box-dependent-interacting protein 1	3	6	1	0	20	21	18	14	102.348	116.303	111.834	115.37	102.948	99.3643	121.558	105.114	95.697	97.2555	108.164	118.938	118.804	120.355	117.683	141.73	395.677	333.24	370.071	343.412	368.445	312.137	363.466	357.527	350.467	358.053	317.699	405.205	363.291	381.396	399.26	400.115	3106.7	4037.11	4441.13	3875.95
sp|Q9NQY0|BIN3_HUMAN	sp	Q9NQY0	HUMAN	BIN3	Bridging integrator 3	4	7	1	0	3	5	2	6	321.866	312.627	320.662	322.499	285.993	318.784	320.376	330.126	346.383	330.781	308.427	350.732	346.009	346.826	312.073	347.434	460.087	443.412	416.276	409.437	429.955	451.334	461.921	460.482	434.422	431.321	423.739	437.802	456.067	449.984	442.703	405.906	429.589	412.756	410.165	438.862
sp|Q13490|BIRC2_HUMAN	sp	Q13490	HUMAN	BIRC2	Baculoviral IAP repeat-containing protein 2	1	5	1	0	8	10	7	10	496.94	425.645	102.534	54.8382	35.738	48.9167	457.7	323.75	271.997	246.966	235.27	510.421	521.347	453.165	380.871	370.116	819.501	592.707	205.086	132.012	115.423	134.858	668.987	559.882	416.11	380.771	453.277	776.096	874.201	833.904	894.907	837.414	1249.37	1176.1	1055.44	1079.44
sp|O15392|BIRC5_HUMAN	sp	O15392	HUMAN	BIRC5	Baculoviral IAP repeat-containing protein 5	2	3	1	0	2	1	1	5	96.7382	90.5559	71.5209	67.226	58.1644	56.5069	71.9479	70.01	66.5191	61.5713	49.738	99.3995	80.2954	66.0147	46.5982	45.3073	143.926	150.127	120.868	135.245	112.192	92.4803	158.025	138.914	114.266	113.287	91.9864	177.528	177.144	139.202	121.25	142.56	190.24	197.923	166.3	169.592
sp|Q9NR09|BIRC6_HUMAN	sp	Q9NR09	HUMAN	BIRC6	Baculoviral IAP repeat-containing protein 6	18	22	1	0	38	34	43	28	1299.57	1220.88	1181.6	1166.56	1023.65	1036.49	1228.66	1154.8	1150.86	1102.07	1129.27	1351.81	1324.29	1271.04	1127.66	1028.87	1297.66	1237.36	1169.21	1173.6	1127.01	1110.44	1222.71	1158.51	1141.19	1129.31	1158.13	1335.49	1354.12	1342.62	1319.89	1212.98	6092.51	6238.4	5882.15	5986.26
sp|P54132|BLM_HUMAN	sp	P54132	HUMAN	BLM	Bloom syndrome protein	5	2	1	0	5	1	6	1	587.44	612.432	618.342	615.546	596.063	570.999	589.351	622.882	613.616	598.764	600.613	632.848	602.649	614.866	617.253	573.538	193.132	212.617	193.929	204.744	192.787	194.466	216.524	190.296	213.833	194.344	194.099	191.586	210.715	188.159	182.867	209.977	678.734	490.665	458.266	514.703
sp|Q13867|BLMH_HUMAN	sp	Q13867	HUMAN	BLMH	Bleomycin hydrolase	21	7	1	0	17	17	14	11	1785.51	1741.63	1775.61	1757.46	1679.54	1581.72	1716.57	1732.42	1705.18	1727.14	1625.8	1831.38	1788.2	1876.2	1915.76	1974.05	534.977	516.575	524.34	501.795	502.443	516.629	520.34	518.068	512.045	527.628	479.207	527.524	523.486	536.046	553.363	564.622	2915.33	2901.77	2954.16	2776.13
sp|P78537|BL1S1_HUMAN	sp	P78537	HUMAN	BLOC1S1	Biogenesis of lysosome-related organelles complex 1 subunit 1	2	1	1	0	4	3	1	3	190.151	165.623	154.875	149.373	158.372	159.935	162.447	165.618	163.826	161.58	149.697	176.745	181.537	172.245	154.104	183.904	50.1792	41.0064	34.5362	37.7125	29.875	35.1618	37.0771	42.0406	36.3228	38.875	33.232	43.3419	44.2075	33.3463	46.6309	35.363	796.717	826.712	782.907	824.392
sp|Q6QNY1|BL1S2_HUMAN	sp	Q6QNY1	HUMAN	BLOC1S2	Biogenesis of lysosome-related organelles complex 1 subunit 2	1	3	1	0	4	2	2	2	41.8507	39.6591	42.7435	41.7104	29.3977	33.0513	41.6138	39.3557	44.3886	38.3208	40.9574	41.3822	38.1727	37.893	38.4057	38.0289	176.149	165.781	164.399	161.18	155.913	146.37	168.197	168.411	171.7	180.151	173.872	175.452	185.117	182.54	161.624	158.309	778.277	811.214	750.444	710.37
sp|Q6QNY0|BL1S3_HUMAN	sp	Q6QNY0	HUMAN	BLOC1S3	Biogenesis of lysosome-related organelles complex 1 subunit 3	1	2	1	0	6	3	5	11	21.4713	20.2	17.6784	21.131	17.0434	16.2404	18.135	19.4206	16.3548	18.2021	15.0212	16.7965	24.9283	21.8483	22.5798	22.8517	157.563	149.839	129.697	133.911	133.614	183.445	141.802	131.396	149.971	147.891	139.55	140.299	148.941	154.336	169.866	186.209	718.885	811.427	831.744	789.046
sp|Q9NUP1|BL1S4_HUMAN	sp	Q9NUP1	HUMAN	BLOC1S4	Biogenesis of lysosome-related organelles complex 1 subunit 4	4	4	1	0	1	0	4	2	296.566	283.95	290.547	267.507	244.415	245.834	300.394	258.499	293.571	265.819	276.551	322.124	279.355	277.404	249.951	322.343	192.311	192.986	188.31	170.839	168.658	181.134	198.63	176.715	175.753	173.646	178.303	204.588	192.99	190.939	186.516	200.681	119.477	95.5537	103.622	123.925
sp|Q8TDH9|BL1S5_HUMAN	sp	Q8TDH9	HUMAN	BLOC1S5	Biogenesis of lysosome-related organelles complex 1 subunit 5	0	1	0	1	1	0	4	3	0	0	0	0	0	0	0	0	0	0	0	0	0	0	0	0	19.7405	15.8453	25.0313	25.0707	19.6636	15.7805	24.4592	23.358	23.9707	22.5162	12.1133	28.3924	25.2643	16.1734	18.1284	14.7416	97.1975	110.459	107.004	110.836
sp|Q9UL45|BL1S6_HUMAN	sp	Q9UL45	HUMAN	BLOC1S6	Biogenesis of lysosome-related organelles complex 1 subunit 6	3	3	1	0	1	4	5	1	510.253	545.834	521.989	492.01	482.59	469.915	555.163	517.651	471.188	493.763	468.022	587.815	514.094	510.223	470.46	461.147	184.989	140.171	177.216	174.804	166.073	182.632	184.81	162.228	163.629	166.494	148.885	188.337	179.719	185.866	198.731	156.548	227.578	203.031	198.922	191.829
sp|P53004|BIEA_HUMAN	sp	P53004	HUMAN	BLVRA	Biliverdin reductase A	20	22	1	0	12	13	11	6	2371.83	2336.05	2319.88	2304.71	2223.81	2203.73	2332.89	2244.44	2295.65	2300.5	2387.82	2374.99	2368.13	2395.51	2403.57	2409.93	2513.66	2418.94	2365.34	2334.96	2398.23	2351.72	2394.96	2347.27	2310.38	2336.64	2332.93	2466.27	2426.06	2421.04	2515.02	2550.9	2056.19	2170.29	2016.87	1995.3
sp|P30043|BLVRB_HUMAN	sp	P30043	HUMAN	BLVRB	Flavin reductase (NADPH)	27	26	1	0	20	16	16	17	1667.07	1520.11	1535.33	1548.17	1558.1	1483.93	1588.5	1543.83	1515.97	1512.75	1528.27	1694.55	1659.67	1699.54	1750.46	1793.64	1861.58	1483.79	1589	1644.57	1675.62	1844.58	1611.7	1638.99	1679.63	1610.48	1643.63	1677.69	1693.26	1800.69	1841.89	1761.37	2547.72	2830.39	2743.45	2487.26
sp|Q9H2G9|GO45_HUMAN	sp	Q9H2G9	HUMAN	BLZF1	Golgin-45	2	1	1	0	4	7	1	5	48.524	48.2212	37.8779	35.5321	38.0976	34.4467	44.1984	42.3323	38.8386	38.8632	33.5298	50.9314	43.2196	49.167	69.0198	79.6882	91.1074	70.8748	87.4779	89.5971	98.8838	86.6224	78.457	78.6853	79.8979	72.9374	81.5989	94.7933	97.318	97.5267	87.8411	72.1615	960.794	851.694	962.84	926.331
sp|P35226|BMI1_HUMAN	sp	P35226	HUMAN	BMI1	Polycomb complex protein BMI-1	0	1	0	1	2	4	3	4	0	0	0	0	0	0	0	0	0	0	0	0	0	0	0	0	54.2351	6.89999	23.1209	17.9744	16.0638	14.0625	24.4048	22.793	13.2668	9.78683	19.8916	58.397	42.7124	48.8498	43.3918	25.0375	466.815	540.496	479.09	425.945
sp|P13497|BMP1_HUMAN	sp	P13497	HUMAN	BMP1	Bone morphogenetic protein 1	1	0	0	1	5	5	9	3	24.2293	21.8917	12.6422	17.5781	13.625	18.6702	20.6126	20.626	17.3289	13.8141	16.7357	29.1125	29.5497	26.3049	19.6455	19.1164	0	0	0	0	0	0	0	0	0	0	0	0	0	0	0	0	748.052	773.834	745.379	823.201
sp|Q9NSY1|BMP2K_HUMAN	sp	Q9NSY1	HUMAN	BMP2K	BMP-2-inducible protein kinase	7	10	1	0	10	9	13	10	1179.02	1063.53	1177.89	1172.82	1201.55	1081.5	1062.33	1087.91	1122.51	1113.64	1078.09	1193.81	1162.2	1230.58	1264.99	1223.55	1195.06	1019.02	1113.05	1091.88	1095.26	978.894	1115	1094.98	1049.36	1056.68	1039.17	1204.64	1162.24	1186.97	1154.52	1136.39	1082.93	980.836	992.537	1003.64
sp|Q8N8U9|BMPER_HUMAN	sp	Q8N8U9	HUMAN	BMPER	BMP-binding endothelial regulator protein	1	0	0	1	0	3	1	1	36.2181	45.0259	33.2882	39.4161	30.5059	26.6826	38.4425	37.8179	32.4492	44.3657	33.4583	42.7224	44.4963	36.1713	33.8489	23.9489	0	0	0	0	0	0	0	0	0	0	0	0	0	0	0	0	0	0	0	0
sp|Q13873|BMPR2_HUMAN	sp	Q13873	HUMAN	BMPR2	Bone morphogenetic protein receptor type-2	0	1	0	1	6	3	2	3	0	0	0	0	0	0	0	0	0	0	0	0	0	0	0	0	15.1424	28.5522	23.1023	17.3303	12.1874	8.61411	26.1806	19.3113	15.1265	12.9155	11.633	31.3123	24.0625	25.0226	19.773	17.937	1222.76	1066.56	1106.3	1183.35
sp|Q14692|BMS1_HUMAN	sp	Q14692	HUMAN	BMS1	Ribosome biogenesis protein BMS1 homolog	20	21	1	0	21	28	24	21	1439.64	1443.3	1396.42	1285.05	1210.63	1099.28	1390.98	1274.05	1144.57	1083.58	1076.35	1498.75	1424.84	1325.58	1333.32	1342.55	939.242	997.517	934.892	899.137	820.27	821.143	1001.39	936.387	837.133	808.077	858.219	953.454	997.531	937.593	942.86	910.489	3226.78	3247.78	3159.72	3212.86
sp|Q12981-1|SEC20_HUMAN	sp	Q12981-1	HUMAN	BNIP1	Isoform 3 of Vesicle transport protein SEC20	15	10	1	0	9	7	5	7	797.021	725.389	798.42	754.512	748.862	749.075	751.473	786.237	778.717	777.379	821.09	624.196	735.332	766.56	785.653	770.078	380.311	371.55	356.549	388.655	349.849	366.305	372.677	355.896	383.791	388.18	407.741	351.454	377.214	375.361	347.74	379.712	896.235	870.06	914.934	849.19
sp|Q12982-2|BNIP2_HUMAN	sp	Q12982-2	HUMAN	BNIP2	Isoform 2 of BCL2/adenovirus E1B 19 kDa protein-interacting protein 2	1	0	0	1	4	2	1	6	109.738	114.368	121.224	106.726	94.5727	92.0006	110.231	104.502	100.277	108.012	116.223	112.46	104.341	105.935	115.3	115.801	0	0	0	0	0	0	0	0	0	0	0	0	0	0	0	0	627.872	671.562	645.481	571.185
sp|Q12983|BNIP3_HUMAN	sp	Q12983	HUMAN	BNIP3	BCL2/adenovirus E1B 19 kDa protein-interacting protein 3	0	2	0	1	1	4	2	3	0	0	0	0	0	0	0	0	0	0	0	0	0	0	0	0	71.0808	104.185	89.2894	66.3863	59.6429	46.6774	104.561	77.9253	87.6051	70.416	72.7871	106.633	103.771	82.3646	75.9014	142.054	238.161	163.014	127.111	228.026
sp|O60238|BNI3L_HUMAN	sp	O60238	HUMAN	BNIP3L	BCL2/adenovirus E1B 19 kDa protein-interacting protein 3-like	0	1	0	1	2	2	5	3	0	0	0	0	0	0	0	0	0	0	0	0	0	0	0	0	107.653	82.9288	95.0649	80.6174	66.9192	57.766	89.0305	93.8921	80.2586	89.5496	123.996	106.376	112.397	101.627	112.079	137.072	417.086	367.612	385.503	311.242
sp|Q96IK1|BOD1_HUMAN	sp	Q96IK1	HUMAN	BOD1	Biorientation of chromosomes in cell division protein 1	1	0	0	1	2	3	0	5	152.825	128.555	113.445	104.953	97.9254	85.2647	136.628	107.444	100.521	87.7487	89.4872	130.334	126.222	97.8867	84.3642	82.8015	0	0	0	0	0	0	0	0	0	0	0	0	0	0	0	0	193.759	191.551	169.006	186.042
sp|Q8NFC6|BD1L1_HUMAN	sp	Q8NFC6	HUMAN	BOD1L1	Biorientation of chromosomes in cell division protein 1-like 1	15	18	1	0	41	51	48	39	1310.34	1278.56	1225.39	1181.66	1108.52	1105.33	1329.46	1230.5	1183.34	1175.7	1130	1364.87	1343.67	1206.4	1116.96	1064.48	1070.04	1041.51	950.092	959.897	910.701	934.289	1048.1	956.239	958.111	961.492	894.77	1065.14	1113.94	1049.36	1046.97	883.835	5814.26	5866.24	5718	5500.82
sp|Q9Y3E2|BOLA1_HUMAN	sp	Q9Y3E2	HUMAN	BOLA1	BolA-like protein 1	3	1	1	0	1	3	1	1	206.934	212.449	215.117	208.797	230.754	228.655	219.832	235.602	203.261	208.844	216.493	225.239	220.902	219.451	240.805	229.524	31.6737	30.6083	27.7541	29.7471	24.2561	27.4602	31.9731	31.3222	27.3922	27.1031	17.9958	34.2238	30.6724	31.6441	28.2307	21.7919	91.439	101.596	88.3053	89.1888
sp|Q9H3K6|BOLA2_HUMAN	sp	Q9H3K6	HUMAN	BOLA2	BolA-like protein 2	20	9	1	0	8	4	4	6	2645.62	2643.5	2479.31	2571.74	2550.19	2418.73	2617.64	2551.06	2499.5	2461.12	2410.83	2684.81	2743.38	2738.24	2718.95	2753.3	1384.69	1453.44	1290.43	1284.18	1328.4	1321.54	1375.82	1365.64	1304.86	1285.44	1196.35	1379.2	1382.41	1374.17	1345.66	1266.98	1197.2	1290.39	1214.18	1135.56
sp|Q14137|BOP1_HUMAN	sp	Q14137	HUMAN	BOP1	Ribosome biogenesis protein BOP1	9	1	1	0	9	24	16	16	427.973	438.729	470.856	439.034	423.388	382.251	460.762	420.901	465.044	443.885	402.14	488.643	469.228	455.335	428.592	374.579	217.857	214.984	199.715	184.605	193.917	177.493	205.065	197.636	197.753	198.948	218.982	206.998	189.896	188.464	199.173	177.7	1708.89	1733.47	1572.65	1555.65
sp|Q969J3|BORC5_HUMAN	sp	Q969J3	HUMAN	BORCS5	BLOC-1-related complex subunit 5	1	1	1	0	4	2	2	1	169.084	147.739	151.848	152.082	146.095	153.534	145.948	147.633	145.333	148.763	151.121	152.858	141.786	149.887	153.376	146.837	15.5945	27.0706	32.4081	20.9837	19.4148	19.7185	46.7744	33.4573	24.0267	16.0614	20.2566	43.0848	45.5343	23.4697	16.5692	13.2446	1086.38	1155.76	979.743	987.367
sp|Q96GS4|BORC6_HUMAN	sp	Q96GS4	HUMAN	BORCS6	BLOC-1-related complex subunit 6	3	4	1	0	6	4	3	5	670.556	551.591	539.255	540.477	528.6	547.407	567.147	546.893	576.171	578.323	599.995	551.55	574.714	584.936	573.106	637.575	591.741	573.414	545.286	575.685	549.595	565.806	537.361	532.15	541.918	534.28	530.334	565.047	572.261	580.656	555.774	569.377	747.071	722.309	765.668	689.547
sp|Q96B45|BORC7_HUMAN	sp	Q96B45	HUMAN	BORCS7	BLOC-1-related complex subunit 7	3	1	1	0	2	1	0	2	269.201	210.193	199.991	186.682	192.401	185.274	208.767	204.337	203.807	195.601	206.566	237.716	225.103	186.247	205.34	195.466	133.958	108.91	101.994	95.7759	97.9874	102.217	101.139	121.812	97.1394	87.8463	92.269	120.729	120.8	128.08	119.455	99.0569	138.19	178.261	141.372	154.976
sp|Q96FH0|BORC8_HUMAN	sp	Q96FH0	HUMAN	BORCS8	BLOC-1-related complex subunit 8	0	1	0	1	2	2	0	2	0	0	0	0	0	0	0	0	0	0	0	0	0	0	0	0	63.2096	44.2217	54.6402	55.436	45.3658	59.6255	53.608	53.0154	62.9977	62.6118	49.9916	54.062	59.3032	61.5009	52.3708	56.4841	166.961	155.316	166.999	174.982
sp|P07738|PMGE_HUMAN	sp	P07738	HUMAN	BPGM	Bisphosphoglycerate mutase	1	1	1	0	5	9	7	9	65.8123	55.6128	52.0426	52.3054	60.634	46.0515	59.0448	56.4071	49.5614	51.5635	49.7738	57.9058	58.2083	55.095	56.0895	55.1584	119.394	86.8192	110.618	104.052	116.859	110.805	108.688	102.49	101.837	109.466	102.03	110.925	110.364	110.827	128.01	108.309	812.234	795.791	862.497	761.581
sp|Q86WA6|BPHL_HUMAN	sp	Q86WA6	HUMAN	BPHL	Valacyclovir hydrolase	7	8	1	0	6	6	4	5	568.038	524.48	541.136	532.29	535.903	611.35	537.003	526.346	522.417	542.347	587.403	561.031	530.413	581.676	587.502	585.142	915.428	715.547	800.352	862.045	824.048	995.189	789.019	764.717	814.428	825.181	1023.87	814.715	828.106	893.146	887.187	902.326	616.104	634.886	608.627	614.943
sp|O95861-2|BPNT1_HUMAN	sp	O95861-2	HUMAN	BPNT1	Isoform 2 of 3'(2'),5'-bisphosphate nucleotidase 1	26	22	1	0	13	11	11	18	3734.97	3480.83	3455.24	3410.69	3337.4	3326.29	3491.29	3457.72	3554.56	3420.26	3524.77	3528.47	3627	3764.66	3841.04	3929.41	2249.38	2055.1	2082.55	2072.67	2022.04	2126.98	2042.67	2101.65	2085.87	2055.01	1967.8	2080.52	2151.88	2078.8	2146.95	2085.12	2728.36	2871.56	2762.41	2653.77
sp|Q12830|BPTF_HUMAN	sp	Q12830	HUMAN	BPTF	Nucleosome-remodeling factor subunit BPTF	14	13	1	0	30	30	32	30	1070.61	1112.8	1031.42	1025.86	973.257	983.903	1085.83	1000.54	1033.59	946.026	932.012	1077.5	1075.43	979.69	982.677	925.557	770.579	806.401	738.207	798.695	772.258	822.067	773.415	763.853	748.607	745.008	718.607	777.056	816.503	763.173	773.001	702.725	4573.44	4393.23	4663.69	4483.64
sp|P15056|BRAF_HUMAN	sp	P15056	HUMAN	BRAF	Serine/threonine-protein kinase B-raf	8	5	1	0	6	5	7	6	991.672	960.376	931.796	926.261	855.2	932.501	982.43	911.778	937.198	883.577	890.014	981.576	984.222	965.199	946.677	970.591	620.778	613.653	587.681	560.718	558.541	574.77	584.704	574.941	552.349	577.411	586.402	581.556	612.183	606.832	592.214	596.465	1376.42	1447.07	1346.92	1365.79
sp|Q7Z569|BRAP_HUMAN	sp	Q7Z569	HUMAN	BRAP	BRCA1-associated protein	2	5	1	0	9	17	10	6	199.554	204.497	195.716	196.562	166.149	179.647	220.728	199.611	195.391	217.607	232.904	225.884	190.572	174.018	158.967	152.996	216.416	226.564	208.618	190.676	201.242	196.864	215.898	197.893	214.695	219.734	239.59	216.174	238.561	212.567	214.936	209.502	1607.59	1663.37	1675.67	1586.52
sp|Q6PJG6|BRAT1_HUMAN	sp	Q6PJG6	HUMAN	BRAT1	BRCA1-associated ATM activator 1	1	1	1	0	1	8	5	4	44.1293	40.228	36.3874	33.2032	32.6915	26.6538	48.1599	45.6927	33.6007	35.9712	26.4711	42.73	39.4553	35.8947	30.101	21.6305	18.065	19.9887	17.816	18.5001	16.8866	11.2611	23.7624	21.6729	10.3051	14.9597	10.3461	17.7585	20.3076	21.4798	19.8079	12.1346	102.457	125.292	110.752	118.602
sp|P38398-7|BRCA1_HUMAN	sp	P38398-7	HUMAN	BRCA1	Isoform 7 of Breast cancer type 1 susceptibility protein	3	0	0	1	4	4	6	1	902.287	873.318	860.449	814.191	829.555	717.988	891.03	820.987	795.175	784.738	650.918	895.642	874.695	764.332	938.758	653.526	0	0	0	0	0	0	0	0	0	0	0	0	0	0	0	0	595.562	532.454	459.591	561.96
sp|P51587|BRCA2_HUMAN	sp	P51587	HUMAN	BRCA2	Breast cancer type 2 susceptibility protein	2	1	1	0	2	2	0	0	76.1282	81.0933	60.7559	51.8037	37.7447	23.2878	87.4439	63.7405	61.2189	49.6324	36.5164	97.9222	79.7474	51.8384	39.3176	26.4503	26.5212	20.2139	14.2501	13.4729	9.70303	4.71889	23.1886	15.3651	13.8734	8.25387	8.4188	23.6877	21.5292	22.9797	28.6928	18.574	385.441	444.182	297.145	422.685
sp|P46736-3|BRCC3_HUMAN	sp	P46736-3	HUMAN	BRCC3	Isoform 3 of Lys-63-specific deubiquitinase BRCC36	5	0	0	1	7	3	5	4	113.934	121.645	120.624	124.486	112.14	127.789	124.908	107.424	123.861	116.619	132.315	132.906	126.006	118.211	131.065	123.823	0	0	0	0	0	0	0	0	0	0	0	0	0	0	0	0	929.248	1068.37	1097.55	1077.5
sp|O95696-2|BRD1_HUMAN	sp	O95696-2	HUMAN	BRD1	Isoform 2 of Bromodomain-containing protein 1	1	2	1	0	6	5	6	4	75.7876	70.1287	72.6573	61.6088	69.1213	60.4452	80.1656	88.0212	63.905	70.571	91.124	77.0743	75.2952	68.1114	60.9598	60.6512	261.78	256.67	253.941	233.836	203.716	199.764	240.2	231.093	243.997	258.544	286.911	249.611	268.95	247.749	235.357	224.958	967.289	991.297	954.317	936.209
sp|P25440-2|BRD2_HUMAN	sp	P25440-2	HUMAN	BRD2	Isoform 2 of Bromodomain-containing protein 2	4	5	1	0	6	8	8	6	289.703	309.295	306.83	280.132	289.313	275.832	316.843	296.469	281.455	293.243	334.03	346.239	294.955	257.17	254.683	312.716	310.278	256.563	297.311	276.456	274.518	265.457	298.1	297.027	277.334	283.796	313.589	308.539	348.124	282.55	285.752	318.194	1183.21	1267.66	1136.83	1155.97
sp|Q15059|BRD3_HUMAN	sp	Q15059	HUMAN	BRD3	Bromodomain-containing protein 3	5	1	1	0	7	6	10	4	327.995	315.795	314.179	318.21	287.723	327.994	313.371	279.24	296.441	296.736	283.315	327.785	316.039	301.717	262.422	263.284	22.9722	16.4734	23.8853	23.2353	16.5417	24.5087	26.356	21.292	17.7776	14.4473	19.8835	21.4559	20.2602	24.8715	21.3225	12.8458	990.002	1008.97	1033.37	900.226
sp|O60885|BRD4_HUMAN	sp	O60885	HUMAN	BRD4	Bromodomain-containing protein 4	16	19	1	0	26	23	13	24	2380.35	2423.98	2252.97	2253.77	2281.42	2350.41	2385.49	2188.61	2124.72	1997.85	2004.79	2503.84	2420.17	2223.8	2149.27	2159.07	1441.67	1543.09	1432.64	1460.82	1400.99	1484.24	1492.11	1455.53	1295.05	1274.95	1272.97	1553.35	1561.61	1407.13	1357.92	1198.24	4745.25	5027.88	4856.55	4473.5
sp|Q9NPI1-2|BRD7_HUMAN	sp	Q9NPI1-2	HUMAN	BRD7	Isoform 2 of Bromodomain-containing protein 7	0	2	0	1	4	14	7	11	0	0	0	0	0	0	0	0	0	0	0	0	0	0	0	0	56.2489	49.8891	64.3663	53.6692	58.2311	51.4907	55.316	64.064	53.1027	51.731	55.4278	54.8688	61.0238	47.5402	50.2002	45.0448	374.436	459.176	420.798	458.478
sp|Q9H0E9-2|BRD8_HUMAN	sp	Q9H0E9-2	HUMAN	BRD8	Isoform 2 of Bromodomain-containing protein 8	3	3	1	0	10	14	8	14	294.962	268.723	269.999	255.078	252.747	239.408	248.802	226.462	232.751	256.611	263.217	284.382	275.5	238.936	244.202	228.815	208.711	178.325	172.761	188.217	175.462	173.276	181.714	180.501	180.685	167.968	196.845	206.243	191.825	208.383	206.271	168.653	1141.2	1190.18	1421.49	1103.84
sp|Q9H8M2|BRD9_HUMAN	sp	Q9H8M2	HUMAN	BRD9	Bromodomain-containing protein 9	1	1	1	0	5	6	8	4	177.054	238.947	218.771	202.996	236.319	290.745	214.123	261.308	239.839	230.753	328.92	211.358	278.701	300.822	233.349	340.311	223.983	245.086	247.519	251.036	241.946	420.931	285.679	236.745	288.707	248.852	417.175	270.414	287.652	230.538	217.45	212.897	1049.75	1085.67	1085.28	970.537
sp|Q9NXR7|BRE_HUMAN	sp	Q9NXR7	HUMAN	BRE	BRCA1-A complex subunit BRE	4	9	1	0	13	6	6	5	414.249	405.286	398.079	382.324	400.435	376.075	390.342	397.793	379.497	412.557	377.618	438.663	438.629	425.765	449.583	410.753	636.764	605.138	615.63	575.173	552.023	530.679	616.97	593.605	577.434	569.638	559.095	631.774	607.071	635.461	608.419	580.809	1499.36	1589.3	1591.11	1556.43
sp|O95415|BRI3_HUMAN	sp	O95415	HUMAN	BRI3	Brain protein I3	0	1	0	1	0	0	0	0	0	0	0	0	0	0	0	0	0	0	0	0	0	0	0	0	172.153	227.017	184.649	174.057	158.008	147.825	230.231	192.112	173.92	177.411	157.9	209.793	217.446	200.095	170.099	171.43	0	0	0	0
sp|Q8WY22|BRI3B_HUMAN	sp	Q8WY22	HUMAN	BRI3BP	BRI3-binding protein	1	1	1	0	0	1	2	2	81.6394	75.8703	70.4392	71.5822	66.2574	78.2026	77.6578	80.3366	75.7774	76.0381	63.5335	64.8389	77.0517	80.659	78.545	75.3321	69.292	75.0976	80.3192	78.1544	69.1014	62.8823	69.2193	73.2964	71.868	78.2375	63.612	77.8209	80.0617	67.3378	72.6743	73.3979	0	0	0	0
sp|Q9BX63|FANCJ_HUMAN	sp	Q9BX63	HUMAN	BRIP1	Fanconi anemia group J protein	1	1	1	0	8	4	4	2	25.9117	34.1679	39.9487	36.9145	26.9379	21.443	33.5189	33.6738	40.7626	30.3154	29.6992	39.0723	38.1668	32.1145	29.8548	23.2199	37.733	44.3703	38.4033	35.3747	33.3017	31.6695	44.7681	40.1733	37.6956	34.3855	25.0537	48.9404	45.3403	44.5325	68.5188	93.8803	1495.59	1285.25	1198.11	1251.17
sp|Q8TDN6|BRX1_HUMAN	sp	Q8TDN6	HUMAN	BRIX1	Ribosome biogenesis protein BRX1 homolog	29	21	1	0	14	18	10	13	2712.48	2541.72	2648.7	2411.76	2223.55	2083.38	2637.85	2521.18	2591.67	2656.17	2641.56	2723.3	2761.47	2473	2465.43	2411.62	1692.91	1574.39	1627.48	1473.34	1341.67	1246.05	1655.97	1636.92	1639.26	1730.63	1883.2	1714.87	1611.12	1698.52	1599.66	1537.6	2268.86	2261.02	2081.59	2084.06
sp|Q8WUW1-2|BRK1_HUMAN	sp	Q8WUW1-2	HUMAN	BRK1	Isoform 2 of Protein BRICK1	10	5	1	0	10	6	7	5	1335.36	1337.21	1296.8	1296.14	1250.16	1293.08	1293.62	1312.86	1329.58	1237.4	1367.02	1388.69	1302.9	1220.12	1138.23	1165.21	360.91	328.688	351.888	362.855	375.251	366.474	337.853	341.957	354.711	350.306	366.097	342.45	367.409	361.671	360.521	323.294	1135.22	1164.47	1120.61	1131.52
sp|Q9HCU9|BRMS1_HUMAN	sp	Q9HCU9	HUMAN	BRMS1	Breast cancer metastasis-suppressor 1	2	2	1	0	0	2	2	0	204.797	206.268	197.762	184.673	158.176	155.384	201.425	180.49	171.075	158.522	152.767	209.889	202.081	186.951	178.133	167.555	74.3411	62.494	70.4909	61.3063	64.1308	44.8398	71.3805	70.405	64.6026	73.5184	55.6711	73.2999	76.2493	69.0003	80.7358	76.0308	0	0	0	0
sp|Q5PSV4|BRM1L_HUMAN	sp	Q5PSV4	HUMAN	BRMS1L	Breast cancer metastasis-suppressor 1-like protein	3	3	1	0	2	4	1	3	258.46	249.871	230.251	232.669	216.293	233.182	247.567	238.568	230.73	249.564	222.405	250.54	243.314	242.107	252.175	255.226	326.409	317.656	271.31	289	279.9	297.501	308.829	308.709	277.186	312.894	315.281	298.06	300.156	311.755	313.036	325.308	276.63	366.016	358.789	375.048
sp|Q5VW32|BROX_HUMAN	sp	Q5VW32	HUMAN	BROX	BRO1 domain-containing protein BROX	16	18	1	0	6	8	7	11	1538.68	1405.77	1451.42	1412.42	1224.01	1306.45	1406.49	1399.64	1356.88	1344.8	1386.54	1555.26	1428.75	1427.38	1406.25	1421.44	1642.91	1554.28	1667.51	1525.66	1515.04	1393.03	1627.3	1593.74	1547.2	1540.61	1510.36	1638.84	1648.68	1577.87	1606.46	1489.57	863.677	740.769	771.506	796.132
sp|P55201-2|BRPF1_HUMAN	sp	P55201-2	HUMAN	BRPF1	Isoform 2 of Peregrin	1	0	0	1	5	9	8	6	57.0192	45.9079	62.7264	57.282	50.6394	51.7975	62.2989	63.7882	51.3278	54.31	51.4796	64.2646	67.6994	57.2479	59.1223	49.0869	0	0	0	0	0	0	0	0	0	0	0	0	0	0	0	0	798.878	888.07	835.019	894.289
sp|Q9NSI6|BRWD1_HUMAN	sp	Q9NSI6	HUMAN	BRWD1	Bromodomain and WD repeat-containing protein 1	6	5	1	0	3	3	2	3	272.191	296.474	277.488	244.236	256.434	264.238	292.865	290.021	274.729	305.092	313.763	306.639	277.26	242.963	272.255	202.723	445.355	385.595	438.581	436.925	415.477	473.6	473.438	475.179	479.563	495.647	562.314	459.593	455.78	440.517	463.29	443.852	359.897	363.867	407.902	352.241
sp|Q9NW68-7|BSDC1_HUMAN	sp	Q9NW68-7	HUMAN	BSDC1	Isoform 7 of BSD domain-containing protein 1	5	4	1	0	6	10	11	7	353.864	318.524	326.377	334.954	332.822	306.381	349.639	345.442	338.399	316.903	310.207	326.35	355.962	358.152	307.681	313.619	184.404	163.369	171.801	163.378	157.407	148.108	171.106	167.566	178.516	157.824	159.298	203.798	190.92	187.241	185.47	158.805	693.559	796.853	686.314	725.354
sp|P35613|BASI_HUMAN	sp	P35613	HUMAN	BSG	Basigin	18	17	1	0	13	14	13	15	1419.67	1355.81	1419.88	1403.46	1262.73	1657.44	1282.45	1461.81	1360.77	1325.2	1646.73	1153.53	1304.21	1462.75	1303.84	1634.34	1141.64	1892.87	1468.93	1418.75	1275.8	984.44	1370.83	1377.41	1315.54	1366.82	1303.14	1429.82	1346.32	1420.26	1191.67	1246.81	1932.37	1728.84	1921.9	1786.44
sp|Q10588|BST1_HUMAN	sp	Q10588	HUMAN	BST1	ADP-ribosyl cyclase/cyclic ADP-ribose hydrolase 2	4	4	1	0	12	5	6	7	100.088	93.3845	105.133	100.184	89.3812	116.735	94.59	120.786	108.362	100.582	104.745	96.8525	97.7305	102.812	90.987	111.76	240.025	288.981	265.395	255.093	230.59	233.012	252.092	240.791	246.382	260.041	246.58	218.626	242.002	222.463	215.616	251.957	1588.8	1434.89	1571.9	1426.5
sp|O14981|BTAF1_HUMAN	sp	O14981	HUMAN	BTAF1	TATA-binding protein-associated factor 172	14	10	1	0	14	20	15	24	1105.96	1121.6	1107.78	1093.19	1041.65	1029.41	1080.57	1092.14	1070.42	1096.04	1091.94	1137.9	1112.37	1112.54	1101.91	1040.57	608.707	533.811	583.515	587.181	574.202	569.842	574.101	583.831	588.211	603.674	608.598	588.653	610.707	596.378	627.415	563.885	1613.03	1615.75	1578.7	1489.86
sp|Q9H0C5|BTBD1_HUMAN	sp	Q9H0C5	HUMAN	BTBD1	BTB/POZ domain-containing protein 1	1	1	1	0	2	1	0	0	22.7575	21.1031	19.5914	11.4663	13.642	10.1529	18.5111	20.0895	15.5919	14.6061	10.9548	22.1124	21.3191	16.501	13.92	17.9908	65.7846	50.395	47.6624	64.1868	63.6625	69.4399	57.193	50.3256	43.1776	39.7609	42.1839	64.752	79.2675	64.7216	57.2934	51.4349	159.879	157.796	168.47	153.438
sp|Q9BSF8-2|BTBDA_HUMAN	sp	Q9BSF8-2	HUMAN	BTBD10	Isoform 2 of BTB/POZ domain-containing protein 10	1	1	1	0	1	0	1	2	29.5545	29.0819	26.8982	14.8386	14.8946	15.6042	28.4393	25.4066	23.7845	24.0038	24.5623	26.4113	23.483	19.0419	19.9908	17.2288	28.2081	22.084	19.4318	16.3608	13.1027	17.88	28.4916	22.7701	22.3342	19.6305	27.0728	25.8503	32.2311	32.0607	33.0574	23.9235	191.134	178.48	178.45	186.407
sp|Q9BX70|BTBD2_HUMAN	sp	Q9BX70	HUMAN	BTBD2	BTB/POZ domain-containing protein 2	1	3	1	0	3	3	3	4	40.9389	16.2486	15.9498	11.1195	10.8097	12.6392	15.938	11.2936	11.9983	14.9427	19.4072	16.5718	18.0692	15.324	12.921	18.6302	202.38	173.196	143.858	123.52	113.505	97.11	173.816	151.158	118.867	112.019	96.0316	194.244	205.077	180.975	148.874	96.825	349.783	446.186	444.773	405.995
sp|P43251-2|BTD_HUMAN	sp	P43251-2	HUMAN	BTD	Isoform 2 of Biotinidase	0	1	0	1	0	2	2	3	0	0	0	0	0	0	0	0	0	0	0	0	0	0	0	0	132.185	129.58	81.8374	72.7488	72.5658	62.2331	133.883	78.7244	64.4987	65.4362	49.3724	149.575	151.719	125.595	128.471	94.8892	0	0	0	0
sp|P20290|BTF3_HUMAN	sp	P20290	HUMAN	BTF3	Transcription factor BTF3	40	25	1	0	52	28	37	30	4146.66	4082.63	3884.17	3542.12	3339.38	2534.56	4128.95	3851.09	3571.77	3167.84	2792.85	4325.95	4088.96	3246.75	2683.93	2554.81	2685.46	2689.16	2416.56	2294.33	2198.73	1789.83	2648.94	2474.83	2298.65	1995.65	1595.22	2691.09	2713.66	2670.01	2509.9	1947.43	8115.08	7432.96	7354.23	7856.05
sp|Q96K17|BT3L4_HUMAN	sp	Q96K17	HUMAN	BTF3L4	Transcription factor BTF3 homolog 4	16	21	1	0	17	15	14	14	1774.73	1715.75	1731.35	1796.92	1663.74	1566.27	1709.75	1778.54	1826.36	1672.17	1706.87	1886.02	1804.84	1827.05	1804.32	1735.26	1731.41	1588.21	1614.64	1732.97	1695.42	1581.25	1657.32	1606.11	1652.07	1556.37	1470.54	1729.48	1703.48	1709.55	1715.39	1516.38	2058.26	2038.22	2108.59	2005.69
sp|Q14201-2|BTG3_HUMAN	sp	Q14201-2	HUMAN	BTG3	Isoform 2 of Protein BTG3	2	0	0	1	3	0	2	0	146.374	191.357	130.608	66.684	37.8022	32.768	176.683	134.947	111.795	117.978	141.307	232.009	121.549	58.4602	67.3591	86.5923	0	0	0	0	0	0	0	0	0	0	0	0	0	0	0	0	743.593	660.303	594.671	752.791
sp|Q7KYR7|BT2A1_HUMAN	sp	Q7KYR7	HUMAN	BTN2A1	Butyrophilin subfamily 2 member A1	4	2	1	0	9	9	9	6	268.747	267.797	308.347	293.266	272.241	315.239	261.022	309.168	307.866	281.928	311.155	217.167	256.136	301.961	283.845	377.725	131.934	193.244	175.282	157.269	138.824	124.73	163.584	164.9	143.115	152.857	155.989	158.101	157.916	152.578	154.348	206.718	1494.72	1262.89	1400.91	1513.37
sp|O43683|BUB1_HUMAN	sp	O43683	HUMAN	BUB1	Mitotic checkpoint serine/threonine-protein kinase BUB1	2	0	0	1	3	2	3	1	79.1806	95.8141	74.8646	54.2542	58.0275	51.559	96.3852	83.0011	84.2707	80.315	52.6981	93.7027	64.4579	39.3371	39.0199	37.8976	0	0	0	0	0	0	0	0	0	0	0	0	0	0	0	0	609.994	438.699	458.576	524.292
sp|O60566-3|BUB1B_HUMAN	sp	O60566-3	HUMAN	BUB1B	Isoform 3 of Mitotic checkpoint serine/threonine-protein kinase BUB1 beta	8	2	1	0	16	14	14	4	259.579	325.337	302.904	272.927	245.601	228.278	308.103	309.517	296.353	303.085	253.389	303.395	268.803	211.808	200.65	160.867	183.714	215.209	181.289	193.055	173.65	163.278	205.658	181.026	196.996	193.607	153.954	171.929	178.255	134.944	153.875	162.285	1828.38	2127.07	1589.29	1986.99
sp|O43684|BUB3_HUMAN	sp	O43684	HUMAN	BUB3	Mitotic checkpoint protein BUB3	17	14	1	0	14	25	22	26	1595.03	1533.51	1493.78	1451.87	1389.5	1314.22	1525.66	1485.36	1573.4	1548.75	1528.85	1563.53	1592.11	1534.44	1521.3	1485.07	1107.13	1099.97	1001.44	982.04	1021.84	988.544	1026.71	1037.07	1088.67	1071.64	1054.63	1028.47	1065.17	1114.04	1084.97	1039.17	3013.83	2764.16	2665.19	2854.44
sp|Q9BRD0|BUD13_HUMAN	sp	Q9BRD0	HUMAN	BUD13	BUD13 homolog	2	1	1	0	5	5	6	2	55.7207	51.7115	43.9915	51.1182	46.8557	49.0659	46.2712	49.5685	42.3982	43.036	41.8926	59.3847	49.0417	45.8999	56.6665	52.9625	23.757	20.7754	24.2589	20.501	21.2214	18.4879	18.9834	24.3297	14.4595	22.2411	16.3509	17.4302	19.2798	21.0925	16.7914	16.7725	641.342	585.223	532.479	569.022
sp|P41223|BUD31_HUMAN	sp	P41223	HUMAN	BUD31	Protein BUD31 homolog	7	12	1	0	8	15	11	15	557.527	524.932	486.904	432.573	420.511	365.574	583.907	488.98	502.455	477.584	466.94	573.003	522.372	454.879	431.378	457.248	807.68	854.346	837.95	752.407	723.341	668.034	862.173	831.577	808.714	775.698	664.325	871.373	908.467	830.46	777.987	654.133	1009.38	989.8	943.407	933.23
sp|Q13895|BYST_HUMAN	sp	Q13895	HUMAN	BYSL	Bystin	9	9	1	0	13	17	13	10	1427.28	1563.99	1510.21	1441.36	1421.62	1274.83	1552.65	1344.25	1301.67	1196.77	1168.8	1639.68	1553.18	1317.89	1256.89	1322.11	800.711	773.936	762.634	768.966	760.898	601.173	804.729	699.553	662.272	621.903	549.028	783.914	784.151	794.065	736.079	751.694	2670.35	2492.89	2341.07	2400.84
sp|Q7L1Q6-3|BZW1_HUMAN	sp	Q7L1Q6-3	HUMAN	BZW1	Isoform 3 of Basic leucine zipper and W2 domain-containing protein 1	66	50	1	0	31	53	31	40	8886.81	8825.59	8645.69	8618.4	8672.52	8457.48	8718.69	8751.02	8679.13	9088.42	9462.58	8977.57	8904.22	8474.09	7763.13	7428.19	4772	5117.61	4966.39	4962.31	5070.99	4636.75	4965.08	5035.95	5124.54	5092.71	5051.98	5037.76	5060.58	5018.5	4823.94	4543.53	8211.82	8646.86	7915.38	8094.49
sp|Q9Y6E2|BZW2_HUMAN	sp	Q9Y6E2	HUMAN	BZW2	Basic leucine zipper and W2 domain-containing protein 2	26	23	1	0	17	20	17	22	3797.37	3631.42	3609.12	3676.11	3612.08	3482.71	3661.06	3688.87	3739.37	3606.29	3450.18	3711.18	3715.72	3653.14	3407.33	3298.13	2262.78	2181.87	2194.37	2162.17	2085.13	2003.86	2199.55	2178.89	2163.48	2094.9	1874.81	2167.94	2202.57	2205.42	2182.57	1917.41	2670.13	2935.19	2814.59	2852.19
sp|Q8N655|CJ012_HUMAN	sp	Q8N655	HUMAN	C10orf12	Uncharacterized protein C10orf12	1	0	0	1	4	5	4	6	80.483	105.524	91.949	83.0268	78.8581	76.8765	97.5526	89.2824	81.1352	78.3957	58.8512	97.9071	90.8214	81.9551	84.9249	67.2454	0	0	0	0	0	0	0	0	0	0	0	0	0	0	0	0	560.449	430.269	486.076	538.361
sp|Q9H7M9|VISTA_HUMAN	sp	Q9H7M9	HUMAN	C10orf54	V-type immunoglobulin domain-containing suppressor of T-cell activation	0	2	0	1	3	5	7	7	0	0	0	0	0	0	0	0	0	0	0	0	0	0	0	0	59.1027	75.2069	68.3205	63.1048	50.7702	51.9773	91.2425	70.4989	46.1629	63.5918	53.4007	84.8656	72.3546	70.2894	66.7929	51.7824	606.562	508.031	495.367	578.624
sp|Q5T2E6|CJ076_HUMAN	sp	Q5T2E6	HUMAN	C10orf76	UPF0668 protein C10orf76	1	3	1	0	2	4	7	6	50.9562	42.2489	48.3317	60.7575	47.7506	43.6772	50.5153	43.2838	45.8208	49.3569	48.4771	44.2738	48.5609	43.383	44.4771	52.0437	56.4178	54.3522	58.7123	60.0069	56.2835	59.7158	62.5051	58.753	74.7409	67.8054	58.4113	56.5852	54.2173	51.5516	51.4113	55.49	327.772	342.988	307.569	337.239
sp|Q9H8K7|CJ088_HUMAN	sp	Q9H8K7	HUMAN	C10orf88	Uncharacterized protein C10orf88	1	0	0	1	4	3	3	9	192.854	219.667	207.984	173.676	164.768	122.496	230.794	221.634	186.66	190.349	180.8	233.403	223.556	182.023	155.116	158.293	0	0	0	0	0	0	0	0	0	0	0	0	0	0	0	0	389.104	394.669	336.142	379.853
sp|Q9H0W9|CK054_HUMAN	sp	Q9H0W9	HUMAN	C11orf54	Ester hydrolase C11orf54	12	9	1	0	6	9	5	6	700.531	725.136	742.338	703.642	715.123	714.184	654.178	679.674	697.829	730.986	760.362	700.408	698.34	752.703	772.99	800.644	684.763	526.432	630.44	588.458	562.232	631.084	595.675	582.591	591.416	583.105	603.16	633.528	633.953	630.192	700.935	697.448	1000.2	1265.02	1144.78	1137.1
sp|Q9H3H3-3|CK068_HUMAN	sp	Q9H3H3-3	HUMAN	C11orf68	Isoform 3 of UPF0696 protein C11orf68	6	5	1	0	6	10	14	8	583.954	548.553	560.973	530.202	479.871	467.189	581.39	573.234	528.621	539.795	493.584	568.118	573.989	563.492	578.475	557.825	408.25	320.261	400.151	354.378	349.526	357.713	397.868	353.912	357.574	360.213	330.833	394.602	397.375	400.313	411.481	393.559	984.989	919.645	955.548	863.515
sp|Q86VG3|CK074_HUMAN	sp	Q86VG3	HUMAN	C11orf74	Uncharacterized protein C11orf74	1	0	0	1	0	0	1	1	130.642	100.411	97.5445	71.0974	62.5426	61.4789	108.049	86.4879	83.8902	77.3083	70.4532	130.013	100.566	50.1681	41.4344	39.4439	0	0	0	0	0	0	0	0	0	0	0	0	0	0	0	0	0	0	0	0
sp|Q9BUA3|CK084_HUMAN	sp	Q9BUA3	HUMAN	C11orf84	Uncharacterized protein C11orf84	1	2	1	0	3	4	3	4	271.891	311.665	276.366	249.602	265.32	177.119	303.851	275.108	253.365	238.52	188.437	312.629	290.222	245.099	238.03	179.097	151.714	121.66	135.454	142.077	135.074	132.739	149.93	137.674	138.302	129.228	104.282	149.33	150.441	147.573	139.287	107.23	234.632	265.173	278.447	257.717
sp|E9PRG8|CK098_HUMAN	sp	E9PRG8	HUMAN	C11orf98	Uncharacterized protein C11orf98	3	2	1	0	3	4	4	1	414.658	419.249	380.622	358.859	369.721	365.706	399.306	351.824	370.185	332.786	355.853	431.83	432.82	356.073	327.592	321.297	221.008	261.218	230.593	234.692	223.394	223.39	246.941	244.398	209.537	202.199	174.854	243.887	240.902	240.852	214.042	192.902	598.771	713.341	760.517	731.001
sp|Q9HB07|MYG1_HUMAN	sp	Q9HB07	HUMAN	C12orf10	UPF0160 protein MYG1, mitochondrial	16	14	1	0	13	9	12	9	1469.3	1400.14	1410	1394.41	1372.65	1271.37	1433.66	1383.16	1327.4	1340.4	1295.53	1550.34	1489.5	1574.67	1514.89	1527.46	1414.46	1350.43	1390.26	1340.82	1358.9	1301.17	1409.84	1352.05	1352.81	1255.08	1163.58	1461.75	1425.98	1383.76	1402.87	1313.34	1607.11	1767.27	1805.18	1695.85
sp|Q8N999|CL029_HUMAN	sp	Q8N999	HUMAN	C12orf29	Uncharacterized protein C12orf29	4	3	1	0	3	5	7	5	410.667	422.53	394.1	386.976	398.764	375.139	415.61	404.29	404.76	414.714	461.197	396.838	401.61	357.955	321.902	307.27	68.9437	108.921	73.5497	69.1787	93.2593	66.8574	74.6665	115.222	83.2195	69.0225	68.5529	80.6685	77.6884	65.6627	75.2833	62.3551	668.177	667.233	567.527	646.073
sp|Q9NQ89|CL004_HUMAN	sp	Q9NQ89	HUMAN	C12orf4	Protein C12orf4	1	1	1	0	2	6	4	4	35.3312	34.3605	35.6872	44.6542	37.4767	47.6354	43.6067	41.4304	39.5126	41.4284	41.7364	42.7536	41.9987	40.2799	45.4044	44.2659	36.9525	28.259	39.158	35.381	43.3248	42.0934	33.4797	33.0443	29.1175	39.0405	45.5288	37.9319	30.3096	41.6425	42.3851	34.9871	335.318	184.055	310.11	269.208
sp|Q96C57|CL043_HUMAN	sp	Q96C57	HUMAN	C12orf43	Uncharacterized protein C12orf43	4	1	1	0	3	4	3	6	280.166	261.956	283.988	252.208	243.987	234.064	269.548	254.48	267.632	248.36	235.949	303.218	280.767	287.435	278.148	279.802	67.3286	70.6769	60.5028	61.2033	59.9985	60.2299	59.8496	63.7263	54.9785	57.8899	57.8222	67.87	66.7227	60.4686	65.3509	54.6693	358.077	378.089	400.077	428.456
sp|Q8N5I9|CL045_HUMAN	sp	Q8N5I9	HUMAN	C12orf45	Uncharacterized protein C12orf45	2	1	1	0	2	1	1	1	122.067	160.594	138.375	131.742	128.246	109.08	163.716	139.475	143.736	141.399	126.19	151.83	135.698	121.17	112.506	94.3552	27.2714	37.7711	36.1516	27.9208	31.5631	23.2571	34.1141	32.1805	29.8682	27.576	28.0786	33.4392	27.2339	28.8169	34.1884	26.5558	160.362	171.176	183.561	166.125
sp|Q99622|C10_HUMAN	sp	Q99622	HUMAN	C12orf57	Protein C10	5	3	1	0	7	11	11	3	483.466	549.739	425.072	354.292	290.072	200.287	515.18	433.688	368.096	313.699	254.968	565.121	501.509	360.218	251.094	224.032	163.626	139.256	144.935	125.555	120.236	93.0202	153.888	140.054	117.117	108.229	101.323	171.776	164.576	164.03	161.4	126.325	1333.6	1689.98	1391.06	1429.68
sp|Q9NWQ9|CN119_HUMAN	sp	Q9NWQ9	HUMAN	C14orf119	Uncharacterized protein C14orf119	2	3	1	0	0	1	2	1	580.828	491.808	351.958	224.521	126.062	116.199	475.954	367.438	307.572	237.951	256.9	577.906	455.19	248.383	184.64	337.096	385.7	329.445	231.47	163.81	110.707	78.4148	334.239	272.102	188.1	154.497	157.613	424.332	456.481	412.327	350.431	334.426	0	0	0	0
sp|Q9BXV9|CN142_HUMAN	sp	Q9BXV9	HUMAN	C14orf142	Uncharacterized protein C14orf142	1	1	1	0	6	4	2	5	41.3873	35.0074	47.95	41.8191	45.7433	36.6989	39.3193	45.201	40.79	36.9478	41.6233	46.8866	36.2305	40.9365	44.2468	40.7852	55.7816	47.6367	51.0311	44.6478	45.9685	43.9378	41.2813	40.9326	53.8231	40.203	41.3913	50.0857	50.3306	50.1775	59.1612	52.6075	529.218	558.384	533.94	489.978
sp|Q9Y224|CN166_HUMAN	sp	Q9Y224	HUMAN	C14orf166	UPF0568 protein C14orf166	43	29	1	0	18	26	21	24	7821.68	7932.92	7840.66	7676.09	8020.35	7686.18	8070.31	7852.89	7754.42	7844.91	7939.54	8172.81	7949.9	7773.83	8143.45	7849.6	3308.97	3103.33	3160.85	3264.88	3270.87	3550.75	3301.39	3289.78	3331.38	3272.06	3343.7	3269.29	3271.62	3327.06	3294.19	3134.97	4302.88	4004.67	3533.55	4191.61
sp|Q8WUR7|CO040_HUMAN	sp	Q8WUR7	HUMAN	C15orf40	UPF0235 protein C15orf40	2	1	1	0	3	0	2	4	302.24	265.672	245.547	264.165	266.146	274.68	246.46	276.479	262.288	263.483	254.384	272.838	280.442	281.493	261.862	261.819	104.437	91.7111	87.4856	86.9333	88.1877	87.5431	90.9858	82.2375	84.9678	91.025	83.5424	88.3834	102.163	87.5952	90.1035	79.0731	504.704	456.255	461.759	403.048
sp|Q9Y2V0|CO041_HUMAN	sp	Q9Y2V0	HUMAN	C15orf41	Uncharacterized protein C15orf41	0	1	0	1	1	0	0	1	0	0	0	0	0	0	0	0	0	0	0	0	0	0	0	0	21.356	4.8717	5.97303	9.32232	8.22594	8.81563	16.111	21.5979	8.87203	20.0922	9.35954	35.8254	39.1685	26.4315	33.067	16.6159	110.534	90.8517	102.885	118.72
sp|Q6ZUT6|CO052_HUMAN	sp	Q6ZUT6	HUMAN	C15orf52	Uncharacterized protein C15orf52	2	1	1	0	14	10	10	8	58.7549	51.6837	65.2455	52.5205	53.5768	63.455	63.174	60.3147	61.1874	55.0457	59.4274	68.4534	60.4042	61.4448	58.8132	55.2563	36.8115	34.4457	38.4605	36.8578	30.8328	27.1855	35.4856	32.069	29.4572	38.4926	35.9349	40.6221	39.4798	30.3424	29.261	29.3604	1274.2	1216.1	1172.82	1335.44
sp|Q9BV29-2|CO057_HUMAN	sp	Q9BV29-2	HUMAN	C15orf57	Isoform 2 of Uncharacterized protein C15orf57	1	0	0	1	1	5	2	4	34.1482	27.4308	27.0602	25.1051	22.5416	21.6479	33.027	25.7363	27.9778	23.0743	23.8285	33.6694	27.898	23.5504	21.3221	19.5056	0	0	0	0	0	0	0	0	0	0	0	0	0	0	0	0	75.7857	82.2299	85.8863	96.9992
sp|Q96S19|CP013_HUMAN	sp	Q96S19	HUMAN	C16orf13	UPF0585 protein C16orf13	2	5	1	0	6	3	6	4	168.076	156.105	153.335	161.015	164.411	159.577	158.768	163.688	159.388	167.557	148.674	170.787	172.064	170.563	175.453	159.145	364.13	340.59	315.303	338.972	338.408	327.329	312.175	345.643	337.736	339.994	322.688	337.482	342.36	355.738	373.491	323.426	865.573	922.518	938.166	890.222
sp|Q96GQ5|RUS1_HUMAN	sp	Q96GQ5	HUMAN	C16orf58	RUS1 family protein C16orf58	1	3	1	0	5	13	10	4	248.422	250.299	246.748	236.732	232.427	247.892	258.288	278.324	245.43	222.563	235.239	189.877	240.375	285.685	242.739	222.839	292.514	261.763	251.376	267.938	260.256	282.223	262.869	285.088	289.412	269.968	277.59	291.902	289.487	292.175	273.155	272.528	1243.07	1252.76	1152.66	1176.8
sp|Q7Z3J2|CP062_HUMAN	sp	Q7Z3J2	HUMAN	C16orf62	UPF0505 protein C16orf62	19	23	1	0	13	14	17	18	1256.85	1115.64	1180.76	1148.53	1077.01	1167.22	1175.54	1123.13	1122.42	1138.55	1125.56	1246.64	1203.12	1271.77	1243.16	1215.44	2086.89	1781.8	2086.37	1933.85	1815.82	1534.04	1979.33	1991.36	1885.59	1949.19	1814.55	2142.76	1990.43	2020.88	2115.45	1994.23	1638.67	1680.07	1554.27	1539.23
sp|Q9BSU1|CP070_HUMAN	sp	Q9BSU1	HUMAN	C16orf70	UPF0183 protein C16orf70	1	3	1	0	2	1	0	5	21.6388	23.7079	23.148	16.2839	15.8192	23.2435	18.2295	18.4937	16.2354	16.6596	20.5201	18.1574	18.513	19.3963	15.3972	24.9117	95.9167	107.737	89.4985	86.9097	91.1234	90.2761	79.8102	89.2431	85.6344	92.823	96.6071	86.0826	86.8429	92.7788	95.2674	90.105	192.548	192.51	199.213	182.723
sp|Q6PH81|CP087_HUMAN	sp	Q6PH81	HUMAN	C16orf87	UPF0547 protein C16orf87	0	1	0	1	0	1	0	0	0	0	0	0	0	0	0	0	0	0	0	0	0	0	0	0	65.0413	76.7317	74.4097	76.9013	55.3598	52.218	85.0353	80.3252	85.1722	115.246	126.553	85.7074	81.5767	73.9766	75.5331	85.4011	0	0	0	0
sp|Q9BQA9|CQ062_HUMAN	sp	Q9BQA9	HUMAN	C17orf62	Uncharacterized protein C17orf62	1	0	0	1	1	3	2	0	53.5566	58.2395	60.7672	57.5132	68.7518	73.5933	61.6846	58.4944	61.6369	58.3928	65.9927	70.0097	66.8813	68.347	66.4441	72.4941	0	0	0	0	0	0	0	0	0	0	0	0	0	0	0	0	244.929	285.793	262.83	276.078
sp|Q9HAS0|NJMU_HUMAN	sp	Q9HAS0	HUMAN	C17orf75	Protein Njmu-R1	8	13	1	0	7	10	5	12	598.86	589.92	582.972	594.781	623.082	602.37	569.668	576.594	560.526	594.13	608.355	615.732	580.783	636.053	617.668	601.564	1613.03	1502.14	1576.97	1577.02	1565.36	1455.37	1534.39	1585.82	1576.9	1570.91	1675.23	1626.99	1570.67	1536.17	1604.83	1456.2	888.148	1060.38	1033.13	1031.65
sp|Q32NC0|CR021_HUMAN	sp	Q32NC0	HUMAN	C18orf21	UPF0711 protein C18orf21	1	2	1	0	7	2	4	4	186.442	177.231	169.088	185.164	174.683	184.949	173.907	167.92	173.737	201.142	185.855	187.014	169.044	195.725	187.408	199.248	49.3861	36.5982	36.9644	42.0056	36.437	52.0558	40.7121	40.3245	46.6439	47.3071	46.3801	39.8096	48.0689	43.4773	44.4518	39.1054	1076.23	1075.43	1158.77	1067.69
sp|Q96B23|CR025_HUMAN	sp	Q96B23	HUMAN	C18orf25	Uncharacterized protein C18orf25	4	4	1	0	12	7	8	5	522.744	538.09	530.362	507.981	492.443	443.941	566.027	529.264	529.466	547.75	504.406	553.417	543.466	552.489	525.545	535.792	447.728	476.568	438.254	478.264	435.252	433.856	458.212	468.364	491.032	493.44	445.265	479.842	471.667	459.378	482.867	463.483	2126.43	2035.68	2179.12	1873.75
sp|Q96B23-2|CR025_HUMAN	sp	Q96B23-2	HUMAN	C18orf25	Isoform 2 of Uncharacterized protein C18orf25	2	0	0	1	0	0	1	3	95.077	86.7633	80.7574	76.9194	72.7379	65.9672	85.8305	70.7659	77.6191	85.6615	72.1317	78.6866	96.9846	77.8678	77.2766	77.1363	0	0	0	0	0	0	0	0	0	0	0	0	0	0	0	0	0	0	0	0
sp|Q96DM3|MIC1_HUMAN	sp	Q96DM3	HUMAN	C18orf8	Uncharacterized protein C18orf8	3	7	1	0	9	2	0	2	373.042	317.009	312.966	333.747	330.254	321.515	327.774	318.022	324.709	359.847	325.182	321.913	344.308	363.19	369.49	354.362	537.352	555.33	538.931	556.077	514.425	461.606	542.468	551.373	527.319	545.391	493.935	513.574	507.394	491.547	535.219	557.222	1550.77	1272.72	1332.17	1315.16
sp|Q9UFG5|CS025_HUMAN	sp	Q9UFG5	HUMAN	C19orf25	UPF0449 protein C19orf25	2	3	1	0	4	4	4	6	69.1588	125.282	112.388	108.881	109.441	72.7588	122.847	110.065	113.624	98.1951	58.6278	129.662	128.168	117.058	73.9608	81.4595	68.9158	72.0835	76.5524	68.6305	66.2299	88.1494	72.8337	79.4952	78.7543	67.8172	79.1347	71.4954	80.086	73.5507	82.0096	71.1151	566.856	535.905	512.787	491.002
sp|Q9BQ61|CS043_HUMAN	sp	Q9BQ61	HUMAN	C19orf43	Uncharacterized protein C19orf43	8	4	1	0	8	9	9	6	1469.7	1623.31	1421.24	1304.7	1215.9	1051.21	1516.31	1377.25	1298.06	1179.03	1089.46	1612.01	1578.58	1391.82	1356.46	1319.19	201.681	211.921	165.849	179.114	170.435	170.644	182.293	175.617	170.422	161.486	137.098	196.264	200.186	203.586	194.855	165.133	1375.7	1491.71	1280.66	1552.78
sp|Q8N9M1|CS047_HUMAN	sp	Q8N9M1	HUMAN	C19orf47	Uncharacterized protein C19orf47	0	1	0	1	5	3	4	4	0	0	0	0	0	0	0	0	0	0	0	0	0	0	0	0	51.7527	63.4247	66.5132	55.1179	40.5639	38.9051	59.2963	52.1252	59.1716	53.9117	50.6138	68.0186	58.2218	61.606	50.2099	43.4009	808.651	905.936	884.64	848.665
sp|Q9UNZ5|L10K_HUMAN	sp	Q9UNZ5	HUMAN	C19orf53	Leydig cell tumor 10 kDa protein homolog	3	3	1	0	6	7	7	8	681.483	557.208	484.43	393.821	295.287	213.727	552.695	444.883	435.307	434.241	367.782	611.034	626.462	511.834	491.922	521.35	321.417	320.317	264.392	207.316	146.45	100.52	286.035	245.289	232.421	207.46	179.01	314.14	297.596	299.756	306.014	253.438	1876.52	1988.07	2122.08	2027.14
sp|Q13901|C1D_HUMAN	sp	Q13901	HUMAN	C1D	Nuclear nucleic acid-binding protein C1D	3	1	1	0	2	3	3	2	197.655	200.201	185.379	164.131	161.046	153.295	189.537	180.396	157.572	192.667	174.001	194.652	203.8	177.588	184.739	160.422	14.777	15.4397	19.2596	16.2627	13.5361	14.1484	25.3244	14.7903	16.5435	20.4344	14.3255	23.5772	16.6977	16.6957	16.8392	16.0116	391.239	326.432	323.624	363.409
sp|Q9NS00|C1GLT_HUMAN	sp	Q9NS00	HUMAN	C1GALT1	Glycoprotein-N-acetylgalactosamine 3-beta-galactosyltransferase 1	1	3	1	0	1	4	1	4	17.8461	20.4376	22.5277	14.555	12.731	20.2889	19.4899	17.4123	14.0785	20.1722	17.8121	16.8561	14.0126	19.4187	24.5853	17.5318	92.2784	147.61	153.83	114.321	114.172	87.1471	147.706	139.539	121.936	132.531	129.489	128.123	118.598	121.633	104.094	129.716	52.2872	52.2873	51.0534	63.5606
sp|Q96EU7|C1GLC_HUMAN	sp	Q96EU7	HUMAN	C1GALT1C1	C1GALT1-specific chaperone 1	2	2	1	0	1	3	3	5	205.791	247.779	235.138	205.284	182.557	200.529	219.077	234.954	195.72	216.514	205.207	190.802	224.49	233.565	206.438	198.231	87.3538	131.489	113.384	86.652	84.581	78.8236	124.985	116.503	87.9748	105.073	101.148	108.365	111.41	100.04	96.7016	110.228	170.462	143.098	138.15	125.725
sp|Q9NX04|CA109_HUMAN	sp	Q9NX04	HUMAN	C1orf109	Uncharacterized protein C1orf109	1	2	1	0	0	2	0	2	120.073	118.072	115.651	107.736	104.206	121.254	101.151	102.519	112.029	117.648	105.417	122.905	110.986	118.321	125.41	121.646	192.915	209.593	205.567	204.806	194.023	226.95	209.378	209.599	217.464	217.999	234.395	206.452	189.543	209.864	209.448	197.097	0	0	0	0
sp|Q9NSG2|CA112_HUMAN	sp	Q9NSG2	HUMAN	C1orf112	Uncharacterized protein C1orf112	2	1	1	0	0	1	0	0	78.349	86.4097	81.471	79.9027	81.3143	75.7614	89.9662	65.7192	63.8422	58.8898	42.1559	84.5436	81.4837	50.0148	52.8737	36.3036	38.1611	42.4264	37.3192	33.7735	37.2744	28.5035	46.2547	40.3891	34.8934	31.3093	22.916	44.4139	45.4594	37.8291	26.2027	26.7972	0	0	0	0
sp|Q6ZSJ8|CA122_HUMAN	sp	Q6ZSJ8	HUMAN	C1orf122	Uncharacterized protein C1orf122	3	2	1	0	2	3	3	4	122.462	137.06	133.883	111.06	106.97	96.1893	132.206	117.793	113.457	101.202	98.6186	146.084	141.446	131.163	127.218	109.902	49.1624	60.9497	36.8523	42.5671	40.4841	52.3071	47.1489	38.483	42.217	45.1851	34.8855	44.6276	47.2084	51.7218	51.9663	48.5262	135.257	123.05	68.735	102.514
sp|Q9NWV4|CA123_HUMAN	sp	Q9NWV4	HUMAN	C1orf123	UPF0587 protein C1orf123	18	14	1	0	10	7	6	17	1220.26	1182.15	1151.62	1137.14	1122.86	1050.82	1177.23	1117.76	1126.2	1055.36	1068.29	1194.61	1256.84	1236.1	1196.05	1208.76	1223.34	1060.73	1049.86	1070.3	1126.3	1109.85	1129.96	1061.24	1106.29	1026.88	915.011	1106.91	1131.27	1153.34	1183.41	1132.1	1606.25	1759.2	1503.69	1573.78
sp|Q8IYL3|CA174_HUMAN	sp	Q8IYL3	HUMAN	C1orf174	UPF0688 protein C1orf174	1	0	0	1	5	5	5	4	177.25	177.237	176.358	163.46	145.664	129.208	194.973	180.234	199.332	200.78	217.355	188.663	185.372	184.036	189.648	199.404	0	0	0	0	0	0	0	0	0	0	0	0	0	0	0	0	578.935	497.89	590.115	532.935
sp|Q9H425|CA198_HUMAN	sp	Q9H425	HUMAN	C1orf198	Uncharacterized protein C1orf198	9	7	1	0	23	12	13	33	1185.06	1104.91	934.926	769.373	664.984	533.416	1109.34	977.844	854.888	824.804	716.671	1199.73	1136.88	932.767	862.505	767.657	812.498	596.566	549.147	476.316	435.374	420.507	634.119	564.715	541.347	521.108	546.164	719.164	790.244	783.295	751.095	686.322	2817.9	2928.59	2759.93	2695.65
sp|Q9H246|CA021_HUMAN	sp	Q9H246	HUMAN	C1orf21	Uncharacterized protein C1orf21	0	1	0	1	0	1	0	0	0	0	0	0	0	0	0	0	0	0	0	0	0	0	0	0	22.7944	28.4286	28.27	18.1357	18.9467	17.6411	21.0081	20.813	25.4781	26.7616	15.0081	18.7429	23.8157	23.2301	28.4706	29.3847	0	0	0	0
sp|Q9BV19|CA050_HUMAN	sp	Q9BV19	HUMAN	C1orf50	Uncharacterized protein C1orf50	3	0	0	1	4	4	2	3	213.78	188.206	185.451	179.809	171.739	170.503	201.001	167.61	176.375	178.218	173.974	212.514	191.806	178.222	166.029	179.088	0	0	0	0	0	0	0	0	0	0	0	0	0	0	0	0	697.109	781.867	794.979	704.142
sp|Q8N6N3|CA052_HUMAN	sp	Q8N6N3	HUMAN	C1orf52	UPF0690 protein C1orf52	2	1	1	0	6	8	6	4	36.2665	36.1943	45.4308	39.7789	39.9727	41.8623	45.1061	45.1375	39.7269	48.0516	46.0317	45.3153	42.8785	49.3444	39.8124	46.9681	39.4939	33.593	38.6429	32.884	36.2795	39.4448	38.5888	39.7811	38.979	34.3818	31.2078	33.0771	34.0857	32.6934	39.2839	40.6455	1041.83	995.7	950.708	945.473
sp|Q07021|C1QBP_HUMAN	sp	Q07021	HUMAN	C1QBP	Complement component 1 Q subcomponent-binding protein, mitochondrial	17	19	1	0	14	21	16	12	1887.37	2041.83	1886.61	1885.47	1928.78	2040.59	1992.85	1945.02	1961.1	1870.52	2008.23	2016.17	1904.54	1997.48	2077.79	2085.69	2333.7	2361.63	2179.17	2349.73	2309.88	2730.34	2256.46	2305.86	2313.24	2361.78	2805.15	2211.27	2229.02	2204.29	2220.97	2328.79	1455.19	1602.49	1576.73	1576.46
sp|Q9BXJ4-3|C1QT3_HUMAN	sp	Q9BXJ4-3	HUMAN	C1QTNF3	Isoform 3 of Complement C1q tumor necrosis factor-related protein 3	0	1	0	1	0	0	1	0	0	0	0	0	0	0	0	0	0	0	0	0	0	0	0	0	196.48	114.922	210.719	219.464	191.283	160.222	178.447	194.196	185.788	197.93	187.852	214.909	158.022	248.294	147.148	171.85	0	0	0	0
sp|P00736|C1R_HUMAN	sp	P00736	HUMAN	C1R	Complement C1r subcomponent	4	2	1	0	3	5	3	3	654.4	329.81	207.697	171.668	107.703	138.332	338.939	179.62	220.568	219.346	364.99	670.508	327.55	256.145	263.635	784.651	500.88	177.17	110.952	75.7938	38.6919	47.394	177.965	82.0666	75.3365	76.4208	115.634	503.124	489.213	486.786	640.04	1035.3	683.418	552.852	521.385	725.869
sp|Q5TEA3|CT194_HUMAN	sp	Q5TEA3	HUMAN	C20orf194	Uncharacterized protein C20orf194	0	1	0	1	1	0	0	1	0	0	0	0	0	0	0	0	0	0	0	0	0	0	0	0	154.161	147.295	143.108	66.1273	50.4116	54.1591	133.238	151.184	71.5596	55.2524	66.0276	146.755	154.8	157.589	137.534	106.475	89.4387	80.8289	71.8176	74.8994
sp|Q9GZN8-2|CT027_HUMAN	sp	Q9GZN8-2	HUMAN	C20orf27	Isoform 2 of UPF0687 protein C20orf27	5	4	1	0	1	2	1	1	856.769	775.294	725.641	765.514	730.995	718.061	756.889	749.658	766.16	704.641	695.195	816.71	811.582	791.69	802.661	807.145	290.46	271.02	255.846	256.382	265.529	278.453	276.987	252.551	287.967	257.168	241.703	285.654	266.11	276.249	257.784	239.109	382.167	264.188	287.432	279.72
sp|O43822-4|CU002_HUMAN	sp	O43822-4	HUMAN	C21orf2	Isoform 4 of Protein C21orf2	1	1	1	0	2	3	2	1	42.4241	37.9229	36.4669	32.7277	31.1438	35.9135	39.7962	36.8233	33.0023	41.8397	38.5804	38.4678	37.9234	38.2372	39.0818	31.2937	36.8566	30.9618	35.1089	28.8831	27.859	31.5726	32.1251	37.8745	34.9183	31.0497	38.3093	39.5185	37.2533	35.5615	43.7112	41.2005	343.482	418.791	449.949	382.666
sp|P30042|ES1_HUMAN	sp	P30042	HUMAN	C21orf33	ES1 protein homolog, mitochondrial	12	10	1	0	13	10	12	7	2220.57	2026.66	2120.39	2103.9	2085.56	2414.73	2087.82	2007.71	2028.27	2131.99	2227.13	2131.79	2192.32	2119.66	2285.12	2267.57	1794.33	1565.34	1563.25	1594.95	1650.73	1949.91	1588.66	1537.61	1592.02	1713.09	1976.93	1513.68	1622.56	1642.74	1748.99	1629.36	1678.36	2200.87	2067.29	2545.38
sp|P57076|CU059_HUMAN	sp	P57076	HUMAN	C21orf59	UPF0769 protein C21orf59	1	2	1	0	6	6	2	4	129.543	126.354	100.681	90.9693	89.0674	82.5743	121.331	109.58	100.946	93.0529	91.3069	110.359	115.78	71.3969	59.7924	78.4151	105.299	93.4581	91.7498	84.5839	76.0956	72.2387	84.2449	85.9569	78.8508	62.7524	59.3241	83.8904	77.9845	99.7486	84.3144	86.1403	624.197	654.882	621.026	596.522
sp|Q86YS7-4|C2CD5_HUMAN	sp	Q86YS7-4	HUMAN	C2CD5	Isoform 4 of C2 domain-containing protein 5	3	5	1	0	7	14	15	13	262.929	229.949	241.875	235.483	254.042	239.452	226.711	241.23	227.533	232.257	263.597	241.777	246.532	232.112	244.16	250.728	218.54	207.99	210.135	195.607	195.294	206.104	221.115	208.036	214.118	201.295	236.638	209.965	195.144	201.747	224.052	221.383	631.737	643.383	574.141	540.267
sp|Q8WWC4|MAIP1_HUMAN	sp	Q8WWC4	HUMAN	C2orf47	m-AAA protease-interacting protein 1, mitochondrial	7	5	1	0	2	6	5	5	856.166	768.207	835.618	814.868	753.607	818.723	778.32	778.782	803.326	847.322	820.959	837.993	770.324	851.141	884.287	784.941	804.351	777.276	862.031	849.386	752.842	711.586	786.996	794.264	809.541	896.648	867.984	837.265	783.434	781.518	883.186	762.055	384.607	342.155	303.383	314.625
sp|Q9BVC5|ASHWN_HUMAN	sp	Q9BVC5	HUMAN	C2orf49	Ashwin	6	2	1	0	6	4	4	7	605.676	498.285	495.975	499.105	457.115	445.89	512.463	493.549	544.637	590.706	632.271	567.112	591.079	513.137	552.391	621.011	60.8703	65.4737	54.3844	43.827	50.5187	47.4036	60.7885	58.3686	55.8465	51.5161	57.031	63.2241	60.587	65.5741	58.2901	63.8459	914.711	866.189	971.519	877.717
sp|Q8N8R5|CB069_HUMAN	sp	Q8N8R5	HUMAN	C2orf69	UPF0565 protein C2orf69	1	0	0	1	1	5	4	1	89.1611	95.1129	95.8872	77.8281	84.9151	89.2433	88.1107	92.44	87.2468	98.9785	84.1151	102.856	91.073	79.6207	88.0237	90.4958	0	0	0	0	0	0	0	0	0	0	0	0	0	0	0	0	289.718	270.091	284.548	248.501
sp|Q3KRA6|CB076_HUMAN	sp	Q3KRA6	HUMAN	C2orf76	UPF0538 protein C2orf76	1	3	1	0	1	1	0	1	39.2323	36.779	40.7325	34.8276	39.985	39.0605	40.4926	37.8109	40.466	35.9164	32.5461	34.3894	34.1682	37.5036	40.6394	40.1043	252.025	223.9	214.495	201.853	234.824	236.285	220.617	214.897	223.857	214.232	217.105	208.155	236.061	238.046	243.007	210.472	79.0557	81.2783	73.6817	69.4221
sp|P01024|CO3_HUMAN	sp	P01024	HUMAN	C3	Complement C3	9	8	1	0	10	11	9	8	591.172	661.137	685.864	705.934	1043.89	1087.89	644.287	749.927	726.114	817.046	968.256	649.656	749.429	659.926	762.397	744.657	226.322	212.172	236.735	250.782	270.229	475.584	244.536	235.945	282.049	253.653	543.536	252.782	289.838	248.983	233.837	302.935	1360.01	1335.22	1028.14	1216.13
sp|Q5JPI3|CC038_HUMAN	sp	Q5JPI3	HUMAN	C3orf38	Uncharacterized protein C3orf38	2	1	1	0	3	4	7	2	272.231	267.449	138.403	69.5947	60.1304	58.5206	264.169	105.778	117.922	105.764	107.43	275.026	286.981	237.17	230.111	242.187	90.1619	47.3729	29.2054	19.455	22.4482	26.9989	68.3575	30.6396	32.275	29.8299	30.3018	81.4646	100.991	87.8167	114.159	78.7888	616.503	678.148	607.208	617.89
sp|Q8NDZ4|DIA1_HUMAN	sp	Q8NDZ4	HUMAN	C3orf58	Deleted in autism protein 1	4	2	1	0	7	5	3	3	173.732	187.904	203.781	215.216	196.508	199.486	207.63	226.038	221.45	241.67	230.273	166.648	196.926	207.983	199.124	266.336	105.982	167.516	126.93	125.24	114.284	122.9	137.438	124.482	144.082	144.673	155.123	138.685	133.396	127.226	129.423	196.546	1340.21	1376.71	1392.78	1422.48
sp|P0C0L4|CO4A_HUMAN	sp	P0C0L4	HUMAN	C4A	Complement C4-A	4	3	1	0	4	3	3	4	296.949	367.809	288.881	321.357	350.909	480.673	389.945	333.814	359.284	363.1	523.717	411.754	401.923	355.859	291.023	470.95	233.489	781.289	409.179	237.376	209.065	254.785	779.45	336.089	277.589	220.592	270.84	846.987	517.255	309.118	214.799	172.149	988.306	504.79	489.769	727.644
sp|Q8N8J7|CD032_HUMAN	sp	Q8N8J7	HUMAN	C4orf32	Uncharacterized protein C4orf32	2	0	0	1	1	0	1	1	163.261	152.047	166.415	167.14	172.704	165.428	176.41	180.056	156.325	169.378	176.362	137.004	149.624	157.753	158.665	184.665	0	0	0	0	0	0	0	0	0	0	0	0	0	0	0	0	224.614	227.375	240.044	215.075
sp|Q49AR2|CE022_HUMAN	sp	Q49AR2	HUMAN	C5orf22	UPF0489 protein C5orf22	2	4	1	0	6	9	7	6	450.999	510.734	470.79	439.382	429.908	323.794	460.697	468.105	434.198	387.474	397.01	488.289	486.447	440.949	401.084	352.391	232.572	251.68	242.383	242.374	214.008	191.83	263.999	244.145	234.846	234.377	186.443	245.047	228.78	225.636	223.473	216.742	615.514	682.917	652.016	627.493
sp|Q96GV9|CE030_HUMAN	sp	Q96GV9	HUMAN	C5orf30	UNC119-binding protein C5orf30	2	0	0	1	0	1	3	2	404.898	497.157	342.657	308.367	279.715	213.769	460.586	364.554	281.541	275.064	288.582	657.914	477.367	350.671	323.631	414.432	0	0	0	0	0	0	0	0	0	0	0	0	0	0	0	0	0	0	0	0
sp|A6NDU8|CE051_HUMAN	sp	A6NDU8	HUMAN	C5orf51	UPF0600 protein C5orf51	4	4	1	0	11	8	8	6	425.367	398.2	400.134	373.706	379.769	402.599	388.627	377.255	380.004	372.431	406.796	417.699	401.615	372.289	359.323	381.34	197.862	167.83	188.048	185.037	185.071	211.779	202.013	176.742	190.663	191.009	203.563	202.906	186.65	181.683	195.58	193.429	1964.46	2095.85	2064.09	1957.02
sp|Q9H6K1|CF106_HUMAN	sp	Q9H6K1	HUMAN	C6orf106	Uncharacterized protein C6orf106	2	2	1	0	3	1	0	1	97.3224	75.092	67.6387	66.1932	69.4219	67.8121	91.2725	76.843	69.3443	78.7802	80.6297	83.6639	91.9101	74.3637	83.6807	98.9796	38.7038	43.3644	33.9872	35.9201	36.3584	38.8442	42.7994	41.2052	43.7636	42.0005	40.4751	47.4289	47.9729	36.1516	49.1465	75.5801	367.074	352.635	331.914	347.055
sp|Q7Z4R8|CF120_HUMAN	sp	Q7Z4R8	HUMAN	C6orf120	UPF0669 protein C6orf120	2	0	0	1	1	1	0	1	127.858	155.91	149.081	145.519	124.884	118.924	168.591	132.926	134.747	122.447	126.627	143.127	134.517	129.77	134.463	143.775	0	0	0	0	0	0	0	0	0	0	0	0	0	0	0	0	195.739	189.743	206.79	182.731
sp|Q9P0P8|CF203_HUMAN	sp	Q9P0P8	HUMAN	C6orf203	Uncharacterized protein C6orf203	2	3	1	0	8	4	5	4	144.168	142.059	162.047	148.585	114.228	152.481	136.704	145.301	133.952	140.829	116.824	160.354	142.522	131.695	135.954	142.88	139.797	120.442	123.185	117.018	130.47	145.062	127.289	116.001	135.889	142.022	150.15	125.475	136.34	147.4	134.393	141.869	2267.09	2081.44	2378.5	2151.59
sp|Q6UWU4-2|CF089_HUMAN	sp	Q6UWU4-2	HUMAN	C6orf89	Isoform 2 of Bombesin receptor-activated protein C6orf89	0	1	0	1	2	1	1	0	0	0	0	0	0	0	0	0	0	0	0	0	0	0	0	0	79.0671	58.9441	60.6005	41.9792	35.484	37.0619	69.8796	62.3166	51.1803	42.1193	34.912	94.6683	75.0269	74.0692	69.0275	57.528	254.635	232.579	219.242	247.485
sp|P10643|CO7_HUMAN	sp	P10643	HUMAN	C7	Complement component C7	0	1	0	1	2	2	1	0	0	0	0	0	0	0	0	0	0	0	0	0	0	0	0	0	161.002	179.274	172.963	147.851	146.704	137.993	148.992	149.532	150.302	153.017	169.624	174.075	160.572	167.125	173.374	166.041	281.001	334.312	329.594	366.469
sp|Q9BPX7-2|CG025_HUMAN	sp	Q9BPX7-2	HUMAN	C7orf25	Isoform 2 of UPF0415 protein C7orf25	1	1	1	0	4	5	6	4	87.792	94.3007	89.829	87.2638	87.7851	93.3881	87.747	100.888	90.8961	98.1711	85.2584	98.2143	91.897	81.9502	91.8647	87.6193	21.8841	19.2481	16.4568	24.2969	20.1647	18.1875	18.8289	17.1839	18.3425	20.3329	22.0592	19.7659	22.8655	18.99	20.2641	20.1687	900.643	819.349	930.735	897.168
sp|Q96N11|CG026_HUMAN	sp	Q96N11	HUMAN	C7orf26	Uncharacterized protein C7orf26	0	3	0	1	1	2	1	0	0	0	0	0	0	0	0	0	0	0	0	0	0	0	0	0	109.783	92.4966	95.8339	100.988	89.3518	93.9558	88.7512	86.5894	101.562	94.1984	85.916	102.074	101.131	98.5204	106.287	95.959	163.611	205.291	213.656	197.256
sp|Q9BRJ6|CG050_HUMAN	sp	Q9BRJ6	HUMAN	C7orf50	Uncharacterized protein C7orf50	6	7	1	0	12	7	7	8	401.471	423.545	385.023	369.864	310.175	288.49	417.787	396.719	365.794	346.498	293.891	395.039	407.451	396.156	422.251	386.84	344.7	356.398	326.48	306.018	294.191	275.227	340.134	340.439	329.776	314.388	262.4	368.473	336.862	352.612	339.88	313.84	2329.43	2543.35	2513.1	2340.46
sp|Q96HJ9-2|CG055_HUMAN	sp	Q96HJ9-2	HUMAN	C7orf55	Isoform 2 of UPF0562 protein C7orf55	25	19	1	0	14	21	17	23	2929.55	3056.87	2958.27	2921.92	3042.36	2890.75	2994.18	2912.63	3105.48	3172.73	3274.24	3090.71	3020.92	3044.16	3180.42	3171.88	2211.21	2063.52	2033.71	2082.46	2152.13	2282.64	2084.27	2088.88	2220.52	2295.75	2341.37	2049.07	2078.34	2135.2	2215.27	2100.74	3387.9	3261.69	3281.01	3425.75
sp|Q9H7E9-2|CH033_HUMAN	sp	Q9H7E9-2	HUMAN	C8orf33	Isoform 2 of UPF0488 protein C8orf33	2	1	1	0	1	8	4	5	128.532	135	119.415	136.792	127.323	112.676	367.205	140.826	111.98	121.71	113.133	144.511	132.789	107.997	118.33	87.3967	25.7419	30.6853	24.4571	25.7113	24.3627	24.9963	26.8077	23.2004	22.1276	21.0307	17.684	26.5231	23.4436	23.4976	22.9245	17.8177	167.176	183.236	178.803	165.358
sp|Q6P1X6|CH082_HUMAN	sp	Q6P1X6	HUMAN	C8orf82	UPF0598 protein C8orf82	0	1	0	1	1	2	0	0	0	0	0	0	0	0	0	0	0	0	0	0	0	0	0	0	46.6899	34.529	41.2704	39.9316	32.7718	40.5068	44.287	41.6147	38.8868	40.4806	40.2823	36.0455	34.7636	38.9753	45.5658	47.0956	72.6728	69.1903	85.3429	71.885
sp|P0DMB2|CH088_HUMAN	sp	P0DMB2	HUMAN	C8orf88	Uncharacterized protein C8orf88	0	1	0	1	2	1	0	1	0	0	0	0	0	0	0	0	0	0	0	0	0	0	0	0	87.2101	77.5737	67.9891	90.9883	69.511	51.1976	81.8597	81.3046	79.2241	65.8732	52.3947	88.617	95.8159	74.8356	74.6306	36.7199	235.312	175.796	184.774	190.663
sp|P02748|CO9_HUMAN	sp	P02748	HUMAN	C9	Complement component C9	1	0	0	1	1	1	2	1	47.8241	55.6768	50.48	43.5228	45.3765	50.6163	52.1763	37.7758	50.7933	48.4581	45.4953	55.0489	40.4124	46.0995	39.3026	47.5873	0	0	0	0	0	0	0	0	0	0	0	0	0	0	0	0	95.9464	113.824	69.872	76.561
sp|Q5T280|CI114_HUMAN	sp	Q5T280	HUMAN	C9orf114	Putative methyltransferase C9orf114	4	1	1	0	1	4	6	5	216.603	195.96	190.834	167.746	199.007	182.12	188.638	177.502	172.714	201.131	175.53	202.983	198.385	170.201	186.851	176.911	47.215	35.1973	54.1771	48.551	48.0844	39.0689	44.9205	41.5808	41.4843	45.4084	42.433	51.7397	46.3518	47.8201	40.3121	44.0332	199.508	207.781	196.811	199.35
sp|Q9BUH6|PAXX_HUMAN	sp	Q9BUH6	HUMAN	C9orf142	Protein PAXX	2	0	0	1	8	4	4	8	116.719	117.881	118.131	122.795	120.161	107.681	124.647	119.824	114.966	105.358	115.825	128.83	127.485	132.488	124.54	130.156	0	0	0	0	0	0	0	0	0	0	0	0	0	0	0	0	1376.94	1429.32	1516.76	1335.88
sp|Q9NZ63|CI078_HUMAN	sp	Q9NZ63	HUMAN	C9orf78	Uncharacterized protein C9orf78	7	11	1	0	11	7	4	7	587.584	595.042	594.612	532.468	532.232	434.053	621.246	538.169	536.99	517.508	430.252	604.017	600.359	524.916	492.935	417.228	572.97	564.528	544.731	556.575	498.397	461.195	582.551	546.23	526.95	478.399	429.092	581.69	571.18	530.92	531.764	448.382	1695.32	2192.36	2075.91	2157.9
sp|Q8N1Q1|CAH13_HUMAN	sp	Q8N1Q1	HUMAN	CA13	Carbonic anhydrase 13	0	1	0	1	3	1	0	1	0	0	0	0	0	0	0	0	0	0	0	0	0	0	0	0	103.078	95.6205	109.25	90.8658	100.192	96.8332	98.9408	98.3738	102.691	105.727	88.1888	106.11	93.1335	100.781	118.17	124.905	394.116	351.029	331.887	335.088
sp|Q9Y2D0|CAH5B_HUMAN	sp	Q9Y2D0	HUMAN	CA5B	Carbonic anhydrase 5B, mitochondrial	1	2	1	0	0	0	0	1	126.699	114.726	98.126	87.766	98.0355	98.0364	102.71	96.9757	91.8626	93.7906	91.9251	110.313	115.531	101.608	102.032	80.3865	92.231	85.3099	94.9492	81.7295	83.7322	90.3443	98.3794	78.9105	81.0448	87.1762	88.3902	99.4475	84.4725	89.4504	75.2435	85.3137	0	0	0	0
sp|P35219|CAH8_HUMAN	sp	P35219	HUMAN	CA8	Carbonic anhydrase-related protein	2	3	1	0	1	1	0	1	104.49	89.1889	94.3829	89.5072	87.1565	84.1485	87.8713	94.6487	91.925	100.634	93.7519	84.791	94.0744	83.5511	85.2578	111.617	91.295	112.177	103.521	97.2369	99.8326	88.8199	118.826	96.8413	110.168	106.155	90.8689	105.19	90.6529	94.0149	104.136	167.39	284.579	287.111	287.457	242.133
sp|Q9H8G2|CAAP1_HUMAN	sp	Q9H8G2	HUMAN	CAAP1	Caspase activity and apoptosis inhibitor 1	3	3	1	0	6	4	5	3	273.229	274.294	280.065	267.141	222.344	265.676	277.443	245.843	282.518	267.959	253.464	291.683	263.078	275.168	283.782	278.315	180.166	181.166	161.918	173.894	151.659	170.246	183.703	165.263	155.755	182.707	180.143	159.175	182.939	183.103	181.228	180.764	1062.18	1067.53	969.007	941.864
sp|Q9Y376|CAB39_HUMAN	sp	Q9Y376	HUMAN	CAB39	Calcium-binding protein 39	27	21	1	0	10	11	14	16	2643.47	2718.53	2752.2	2740.01	2625.51	2482.61	2695.24	2763.03	2811.68	2869.92	2983.5	2780.72	2713.68	2717.56	2657.58	2595.5	1645.49	1556.91	1636.67	1601.14	1523.77	1220.73	1575.42	1660.58	1607.26	1647	1652.2	1621.29	1619.4	1620.61	1668.55	1615.37	1383.19	1313.02	1185.57	1251.48
sp|Q9H9S4|CB39L_HUMAN	sp	Q9H9S4	HUMAN	CAB39L	Calcium-binding protein 39-like	6	7	1	0	4	2	1	1	264.425	257.055	247.338	250.573	236.453	243.435	244.621	247.228	256.196	259.74	251.985	262.89	239.399	247.347	241.277	265.864	473.904	405.291	459.442	439.188	502.741	469.357	444.184	445.782	503.145	490.78	489.47	440.967	479.392	493.968	525.34	611.014	486.365	513.934	493.589	497.737
sp|Q9Y6J0|CABIN_HUMAN	sp	Q9Y6J0	HUMAN	CABIN1	Calcineurin-binding protein cabin-1	1	0	0	1	7	7	9	11	151.816	148.283	131.509	121.056	125.652	112.756	142.69	123.048	120.336	108.716	108.614	157.721	135.398	119.355	120.038	125.568	0	0	0	0	0	0	0	0	0	0	0	0	0	0	0	0	830.51	865.88	814.275	838.725
sp|Q8TDN4|CABL1_HUMAN	sp	Q8TDN4	HUMAN	CABLES1	CDK5 and ABL1 enzyme substrate 1	1	0	0	1	3	0	1	1	104.901	74.984	86.8047	91.0568	94.4922	95.0336	87.3114	76.8699	81.1992	90.5166	101.668	80.904	96.9998	93.1858	94.8807	103.253	0	0	0	0	0	0	0	0	0	0	0	0	0	0	0	0	573.082	534.041	551.446	508.782
sp|Q9BTV7|CABL2_HUMAN	sp	Q9BTV7	HUMAN	CABLES2	CDK5 and ABL1 enzyme substrate 2	2	1	1	0	1	0	1	1	178.914	183.563	177.382	164.273	168.424	181.914	169.633	171.069	151.151	169.943	178.235	184.412	172.418	179.237	176.146	181.898	30.5645	28.2492	33.3554	30.504	24.9268	23.1796	30.8548	33.963	30.2876	29.0687	27.7565	31.8932	33.4937	25.9945	32.8907	26.7212	49.1443	60.6491	67.2944	64.5845
sp|P54289|CA2D1_HUMAN	sp	P54289	HUMAN	CACNA2D1	Voltage-dependent calcium channel subunit alpha-2/delta-1	6	6	1	0	23	24	20	16	229.751	235.461	239.963	258.447	255.002	269.357	245.466	236.778	237.787	244.99	283.188	225.342	230.752	277.571	236.563	265.091	179.082	244.635	217.272	200.469	193.107	198.157	257.157	193.904	180.529	213.997	211.505	206.472	208.314	207.096	204.695	230.862	3956.01	4360.79	4611.47	4501.76
sp|P54289-3|CA2D1_HUMAN	sp	P54289-3	HUMAN	CACNA2D1	Isoform 3 of Voltage-dependent calcium channel subunit alpha-2/delta-1	0	1	0	1	0	0	1	1	0	0	0	0	0	0	0	0	0	0	0	0	0	0	0	0	91.9747	83.7295	100.866	89.193	93.2486	86.795	88.2806	90.8368	76.3395	84.4997	73.8331	95.4909	96.3887	105.586	89.9324	87.04	0	0	0	0
sp|P54284|CACB3_HUMAN	sp	P54284	HUMAN	CACNB3	Voltage-dependent L-type calcium channel subunit beta-3	1	0	0	1	3	2	1	4	39.1574	21.6214	28.3695	26.9046	25.0082	36.0681	31.9751	26.6273	32.3021	30.7174	29.9184	32.5095	27.5249	31.1012	33.2458	36.5845	0	0	0	0	0	0	0	0	0	0	0	0	0	0	0	0	432.888	470.087	431.208	469.829
sp|Q8WUQ7-2|CATIN_HUMAN	sp	Q8WUQ7-2	HUMAN	CACTIN	Isoform 2 of Cactin	8	4	1	0	9	7	10	11	744.88	743.123	735.377	678.775	680.616	640.762	736.304	704.177	717.29	718.008	749.463	762.92	727.978	718.075	741.62	724.502	130.899	131.669	117.919	124.046	130.592	139.102	131.662	134.048	119.552	126.336	148.8	137.983	128.374	129.286	128.204	120.198	1512.75	1528.43	1516.55	1407.84
sp|Q86Y37|CACL1_HUMAN	sp	Q86Y37	HUMAN	CACUL1	CDK2-associated and cullin domain-containing protein 1	2	2	1	0	4	6	3	6	122.829	135.618	112.66	118.034	115.37	113.159	147.332	130.609	119.245	132.854	112.517	131.073	123.843	125.405	119.518	120.376	84.6179	61.1592	74.7645	70.3526	73.9455	60.0163	86.7695	66.6483	67.9452	62.4821	69.8094	82.6888	79.0198	67.3683	78.0038	75.3735	844.991	1005.19	851.143	892.001
sp|Q9HB71|CYBP_HUMAN	sp	Q9HB71	HUMAN	CACYBP	Calcyclin-binding protein	44	35	1	0	32	26	32	26	5530.95	5326.64	5371.52	5232.91	5282.99	4961.07	5317.35	5257.24	5411.68	5255.54	5054.24	5451.42	5591.31	5117.16	5275.76	4839.68	4126.39	4345.32	4147.85	4154.12	4151.18	3827.44	4107.98	4095.47	4155.33	4047.1	3483.55	4208.51	4167.69	4084.78	3965.3	3692.74	6288.39	6445.34	5807.96	6229.15
sp|P27708|PYR1_HUMAN	sp	P27708	HUMAN	CAD	CAD protein	89	75	1	0	52	67	55	60	8698.98	8708.6	8500.42	8471.29	8575.17	8824.17	8630.52	8526.71	8385.55	8736.78	8456.85	8709.17	8753.43	9103.96	9278.94	8903	6490.63	6052.42	6360.12	6149.51	6217.12	6465.95	6253.15	6141.93	6119.31	6308.47	6528.73	6427.28	6214.63	6421.09	6368.06	6183.6	7002.99	7436.45	8106.02	7298.84
sp|Q9P1Z2|CACO1_HUMAN	sp	Q9P1Z2	HUMAN	CALCOCO1	Calcium-binding and coiled-coil domain-containing protein 1	2	3	1	0	5	5	7	5	288.864	296.966	251.211	232.813	211.449	197.999	295.783	236.069	226.755	216.457	181.905	306.057	279.489	232.996	198.504	203.876	197.519	288.113	259.43	212.193	223.012	180.84	292.332	277.297	239.205	226.617	179.576	301.287	286.021	232.097	216.823	202.085	567.742	563.813	577.626	592.263
sp|Q13137-4|CACO2_HUMAN	sp	Q13137-4	HUMAN	CALCOCO2	Isoform 4 of Calcium-binding and coiled-coil domain-containing protein 2	3	10	1	0	6	8	12	4	452.056	336.855	218.877	132.961	115.214	134.281	370.67	215.655	203.466	220.661	272.223	479.85	316.765	223.197	213.892	263.998	779.968	1179.81	1025.4	876.199	783.63	643.927	1191.23	1064.88	907.556	871.108	767.115	1189.93	1110.84	901.073	915.862	820.159	1078.13	1026.54	1022.12	1011.62
sp|Q05682|CALD1_HUMAN	sp	Q05682	HUMAN	CALD1	Caldesmon	116	98	1	0	236	138	106	204	15815.2	15362.1	15229	15116	15425.9	14009.6	15211.7	15595	15557.1	14956	14646.5	15474.1	16125.5	16134.5	16385.3	15256.1	11553.8	10953	10334.9	10462.7	10334	10058.1	10146.2	10436.4	10519.3	9901.88	9628.43	10696.9	10679.7	11169.8	11103.1	11413.1	51233.5	46717.5	51516.3	49327.9
sp|Q05682-4|CALD1_HUMAN	sp	Q05682-4	HUMAN	CALD1	Isoform 4 of Caldesmon	4	2	1	0	4	4	4	5	641.819	535.234	565.594	567.984	543.5	353.094	550.973	588.812	474.305	226.796	309.166	520.959	581.742	615.735	572.601	406.78	156.511	112.881	118.221	118.338	98.7662	99.6567	129.141	124.081	96.1214	66.5618	68.421	130.153	131.491	125.735	140.719	91.4879	795.311	737.899	717.83	609.909
sp|Q05682-3|CALD1_HUMAN	sp	Q05682-3	HUMAN	CALD1	Isoform 3 of Caldesmon	0	1	0	1	1	0	1	3	0	0	0	0	0	0	0	0	0	0	0	0	0	0	0	0	154.075	149.44	125.492	143.332	129.012	158.12	139.694	137.898	126.688	131.331	143.295	123.618	146.719	146.173	154.856	156.285	113.288	105.481	110.812	93.3161
sp|Q9HA72|CAHM2_HUMAN	sp	Q9HA72	HUMAN	CALHM2	Calcium homeostasis modulator protein 2	1	1	1	0	1	3	0	1	28.1319	28.1092	29.3507	22.9957	29.6408	21.6184	27.4532	37.7039	18.9451	37.7684	29.3513	35.5522	31.3713	45.8457	27.3445	29.7128	18.6337	26.9071	22.7799	24.5431	18.1368	16.9211	22.3464	18.8946	16.1361	19.2414	12.4592	23.5411	18.6097	15.9152	20.9342	18.3407	108.22	99.5504	105.902	108.248
sp|P62158|CALM_HUMAN	sp	P62158	HUMAN	CALM1	Calmodulin	35	38	1	0	81	95	71	53	3217.76	3143.14	3103.21	3035.77	3096.81	2884.51	3088.44	3143.36	3250.95	3066.68	3005.91	3251.65	3213.85	3279.83	3416.22	3252.66	2078.5	1834.98	1927.51	1977.97	2142	2118.51	2050.04	1996.44	2041.29	2003.63	2055.87	2087	2020.81	2082.45	2109.5	2053.52	7086.94	7751.36	8056.89	9261.68
sp|P27797|CALR_HUMAN	sp	P27797	HUMAN	CALR	Calreticulin	177	134	1	0	172	142	129	209	19592.5	18127	18380.8	18276.8	17990.7	18207.9	18301.1	18326.4	18255.7	17444.3	18394.4	18553.3	18951.9	19729	20066	20707	15587.5	14120	14225	14509.1	14406.9	15202.7	14249.1	14623.2	14058.9	13763.6	14332.5	14683.8	14645.5	14966.6	14637.2	15693	32626.9	34347.6	32154	39698.3
sp|O43852-3|CALU_HUMAN	sp	O43852-3	HUMAN	CALU	Isoform 3 of Calumenin	18	11	1	0	11	12	6	15	2486.72	2287.78	2376.37	2218.65	2095.92	2121.61	2318.68	2346.94	2302.81	2147.02	2302.84	2330.67	2449.82	2388.96	2415.33	2359.55	1120.8	1065.81	1053.69	1018.7	1044.59	1013.15	1027.35	1048.59	950.625	951.348	943.752	1035.13	1051.15	1113.02	1091.14	1026.52	1527.94	1721.02	1747.49	2279.08
sp|O43852-4|CALU_HUMAN	sp	O43852-4	HUMAN	CALU	Isoform 4 of Calumenin	57	51	1	0	107	107	97	107	6564.71	6616.4	6621.62	6232.49	5870.07	5890.29	6542.43	6516.19	6266.02	5806.47	6014.78	6840.26	6789.88	6912.74	6782.73	6602.37	4026.17	3936.22	3692	3753.25	3571.86	3765.72	3783.96	3826.81	3611.68	3430.86	3301.22	3865.36	3925.14	3861.07	4001.03	3722.36	17887.5	18685.3	19563.2	18111.5
sp|Q14012|KCC1A_HUMAN	sp	Q14012	HUMAN	CAMK1	Calcium/calmodulin-dependent protein kinase type 1	2	6	1	0	3	2	2	4	131.702	129.114	124.661	138.51	129.323	117.414	137.606	117.103	117.808	128.706	121.913	136.605	138.777	124.837	132.105	138.938	434.036	435.172	409.16	381.838	390.944	473.115	431.097	402.09	384.787	378.596	414.485	436.964	433.503	426.917	431.668	376.586	541.856	622.698	637.985	565.353
sp|Q8IU85|KCC1D_HUMAN	sp	Q8IU85	HUMAN	CAMK1D	Calcium/calmodulin-dependent protein kinase type 1D	5	10	1	0	2	1	2	1	550.441	554.149	548.818	577.506	596.9	660.745	578.875	543.094	529.579	526.517	553.726	568.447	552.956	580.382	538.563	552.454	1104.52	1090.66	1048.01	1053.6	1036.25	1016.99	1108.02	1076.74	1034.99	1018.85	1013.85	1078.16	1131	1084.87	1025.93	1009.7	243.939	203.814	223.19	221.983
sp|Q13557-11|KCC2D_HUMAN	sp	Q13557-11	HUMAN	CAMK2D	Isoform Delta 11 of Calcium/calmodulin-dependent protein kinase type II subunit delta	16	15	1	0	31	28	22	35	1745.34	1783.67	1734.46	1735.97	1779.23	1775.04	1761.03	1754.62	1712.6	1767.91	1774.43	1832.39	1791.45	1789.75	1882.38	1898.98	1252.45	1273.88	1206.09	1200.33	1258.4	1390.66	1228.45	1236.59	1225.36	1240.92	1328.51	1283.86	1234.74	1245.43	1319.04	1409.63	5428.4	4799.92	4595.98	4641.27
sp|Q13555-6|KCC2G_HUMAN	sp	Q13555-6	HUMAN	CAMK2G	Isoform 6 of Calcium/calmodulin-dependent protein kinase type II subunit gamma	12	11	1	0	22	12	8	16	1513.45	1356.78	1339.27	1329.35	1431.12	1507.88	1358.31	1341.77	1366.55	1434.44	1485.89	1371.7	1413	1502.79	1613.76	1605.62	1474.87	1380.06	1445.9	1476.21	1498.07	1592.7	1499.57	1400.69	1389.29	1487.44	1563.02	1446.55	1401.66	1459.62	1467.42	1509.09	3445.56	3741.53	3433.06	3459.22
sp|Q16566|KCC4_HUMAN	sp	Q16566	HUMAN	CAMK4	Calcium/calmodulin-dependent protein kinase type IV	2	1	1	0	8	4	7	3	123.502	110.804	112.848	94.8827	92.3677	90.9471	112.357	102.523	111.747	104.939	94.33	114.111	128.839	108.826	96.4687	96.8465	18.5625	15.5691	20.5179	14.8708	17.702	12.4824	13.4556	16.933	16.4311	11.2272	9.87591	15.8273	16.3975	19.0071	16.674	15.5626	999.271	934.211	948.094	912.452
sp|Q8N5S9-2|KKCC1_HUMAN	sp	Q8N5S9-2	HUMAN	CAMKK1	Isoform 2 of Calcium/calmodulin-dependent protein kinase kinase 1	1	0	0	1	4	0	0	2	46.9646	41.0475	34.7682	42.6808	33.6787	37.3071	46.2802	41.0776	41.423	37.2987	37.4319	45.1604	46.3468	41.4644	43.2265	38.844	0	0	0	0	0	0	0	0	0	0	0	0	0	0	0	0	485.455	484.109	487.018	597.725
sp|Q96RR4|KKCC2_HUMAN	sp	Q96RR4	HUMAN	CAMKK2	Calcium/calmodulin-dependent protein kinase kinase 2	2	3	1	0	11	4	2	6	284.318	252.915	234.023	231.757	194.643	218.421	262.028	244.457	234.004	215.251	229.703	265.358	270.462	242.971	213.973	228.988	404.102	333.642	321.261	316.461	312.834	342.196	311.251	335.186	299.013	300.316	296.347	359.309	374.889	390.665	390.737	442.295	1483.84	1694.21	1518.45	1532.53
sp|Q7Z624|CMKMT_HUMAN	sp	Q7Z624	HUMAN	CAMKMT	Calmodulin-lysine N-methyltransferase	0	1	0	1	1	2	1	2	0	0	0	0	0	0	0	0	0	0	0	0	0	0	0	0	56.2395	45.7693	42.2764	39.2396	39.3023	36.6099	46.7861	36.8934	38.3021	35.6804	30.4195	46.253	53.2211	46.5649	50.8368	38.9738	90.4899	83.5276	99.2761	78.1617
sp|P49069|CAMLG_HUMAN	sp	P49069	HUMAN	CAMLG	Calcium signal-modulating cyclophilin ligand	4	6	1	0	2	5	4	1	260.259	248.713	247.529	242.883	208.547	205.417	255.7	269.853	234.035	216.772	236.487	203.69	237.405	257.306	218.077	241.793	206.19	214.887	190.493	191.485	176.102	188.881	260.312	185.478	190.291	193.326	202.566	206.785	213.002	184.8	221.896	183.977	432.016	376.824	357.201	443.383
sp|Q5T5Y3-3|CAMP1_HUMAN	sp	Q5T5Y3-3	HUMAN	CAMSAP1	Isoform 3 of Calmodulin-regulated spectrin-associated protein 1	2	2	1	0	21	19	15	16	200.553	200.944	180.596	179.947	186.988	177.101	206.438	206.86	191.264	209.933	180.644	184.014	207.176	197.476	183.235	181.954	147.906	149.617	145.778	142.323	155.151	140.132	147.102	162.187	136.059	149.942	134.468	144.365	147.512	146.774	143.703	128.1	2998.51	3294.69	2961.61	3122.26
sp|Q08AD1|CAMP2_HUMAN	sp	Q08AD1	HUMAN	CAMSAP2	Calmodulin-regulated spectrin-associated protein 2	16	12	1	0	26	23	26	25	726.548	779.813	710.382	718.14	660.403	627.272	777.504	761.993	742.942	712.06	679.668	753.119	767.724	753.935	746.645	708.612	837.044	835.447	833.464	801.631	828.09	781.337	859.679	859.298	834.191	810.731	755.757	868.016	887.03	860.083	858.18	888.996	4120.68	4269.01	3815.03	4104.18
sp|Q86VP6|CAND1_HUMAN	sp	Q86VP6	HUMAN	CAND1	Cullin-associated NEDD8-dissociated protein 1	114	104	1	0	86	88	74	71	13483.9	12805.2	13220.7	13247	12921.4	12465.8	12976	13137.7	13145.9	12900.9	12919.3	13792.7	13362.8	13848.2	14391.6	14366.1	10379.6	10352.1	10623	10408.4	10233.1	9333.11	10434	10383.1	10200	10065.9	9452.94	10388.5	10347.6	10649.7	10607.7	10902.8	15364.4	16620	16345.9	15762
sp|O75155|CAND2_HUMAN	sp	O75155	HUMAN	CAND2	Cullin-associated NEDD8-dissociated protein 2	8	7	1	0	13	9	7	9	887.656	842.8	825.099	821.816	826.004	847.545	854.315	777.913	793.519	806.94	843.477	869.638	799.257	829.467	879.474	852.347	360.365	343.169	324.294	307.433	311.731	303.664	351.693	334.507	301.468	315.976	292.494	400.139	368.503	356.12	365.38	308.692	2010.45	2135.27	2121.07	2103.18
sp|Q8WVQ1|CANT1_HUMAN	sp	Q8WVQ1	HUMAN	CANT1	Soluble calcium-activated nucleotidase 1	9	6	1	0	9	6	9	9	596.361	722.507	675.531	636.013	615.59	634.348	683.426	719.159	632.714	624.955	557.865	492.381	660.307	685.202	585.732	553.097	239.354	445.035	326.994	281.655	240.091	208.087	325.348	311.946	270.177	270.006	250.988	322.236	282.629	281.03	269.886	272.144	1126.58	1061.11	1065.43	1065.69
sp|P27824-2|CALX_HUMAN	sp	P27824-2	HUMAN	CANX	Isoform 2 of Calnexin	100	84	1	0	91	68	73	83	12797.2	11929.1	12810.6	12573.8	12690.5	12586.6	11410	12177.4	12558.4	11964.1	12379.1	9500.84	12016.5	12736.9	13461.1	12398.2	7870.21	8199.3	7635.4	7949.42	7639.74	7698.42	7806.17	7922.68	7853.02	7921.56	8052.14	8071.99	8040.86	8015.81	7405.06	8296.53	17384.6	16343	16999.4	17333.8
sp|Q01518|CAP1_HUMAN	sp	Q01518	HUMAN	CAP1	Adenylyl cyclase-associated protein 1	133	99	1	0	129	119	116	100	17788.5	17577.5	17507	17703.3	17901.2	17005.6	17574.2	17721.4	17803	17208.2	17093.7	17892.6	18365.3	19119.7	19776.7	19180.8	10732.7	9873.82	10108.7	10302.4	10498.8	10502.6	10061.6	10269.9	10268.8	9804.81	9607.99	10369.6	10451	10582	10548.8	10464.2	26464	28531	28702.3	30313.7
sp|P40123|CAP2_HUMAN	sp	P40123	HUMAN	CAP2	Adenylyl cyclase-associated protein 2	34	29	1	0	21	25	24	26	3938.01	3885.77	3892.44	3843.68	3825.27	3628.81	3851.21	3810.59	3857.05	3741.77	3724.3	3995.22	4030.22	4195.37	4223.18	4113.8	2816.34	2715.01	2752.76	2737.98	2783.17	2762	2731.26	2778.13	2709.37	2729.09	2550.38	2790.46	2787.99	2844.61	2837.65	2779.8	3721.79	3574.64	3873.11	3572.05
sp|P40121|CAPG_HUMAN	sp	P40121	HUMAN	CAPG	Macrophage-capping protein	29	29	1	0	41	13	18	15	2121.29	2032.74	2046.66	2024.72	1993.74	1851.45	2039.77	1990.25	2000.57	1995.3	1896.51	2137.8	2151.37	2239.4	2338.23	2305.16	2300.58	2107.11	2012.78	2015.97	2079.72	2146.33	2000.33	1999.57	1931.89	1967.82	1996.57	2086.88	2146.87	2208.91	2361.63	2470.39	6635.3	6451.61	6320.76	6401.89
sp|P07384|CAN1_HUMAN	sp	P07384	HUMAN	CAPN1	Calpain-1 catalytic subunit	58	59	1	0	45	56	47	50	5185.3	4696.79	4865.05	4862.49	4771.92	4686.04	4763.44	4819.55	4863.67	4918.9	4820.99	4964.31	5123.29	4988.13	4889.8	4865.87	5200.61	4660.18	5031.57	4821.81	4754.31	4163.23	4851.76	4900.92	4885.08	4710.83	4529.08	5143.64	4920.15	5180.9	5182.94	5191.24	6641.86	6935.67	6350.8	6307.43
sp|P17655|CAN2_HUMAN	sp	P17655	HUMAN	CAPN2	Calpain-2 catalytic subunit	93	85	1	0	62	71	67	76	6702.21	6289.35	6509.88	6365.33	6432.25	6175.89	6151.03	6339.3	6225.78	6347.01	6150.75	6588.72	6574.73	6856.94	7303.96	6870.7	7003.39	6452.21	6758.64	6554.36	6316.32	5790.47	6721.16	6691.54	6530.6	6152.97	5884.84	6973.68	6847.14	6743.61	6873.11	6948.92	8180.21	8089.02	7860.51	8186.35
sp|O15484|CAN5_HUMAN	sp	O15484	HUMAN	CAPN5	Calpain-5	1	5	1	0	10	9	11	12	74.8856	73.517	78.6399	64.6965	53.4928	68.6647	66.9585	83.1678	63.7312	65.69	72.9709	68.9282	69.4206	84.4672	66.6445	68.1999	197.681	187.573	229.719	204.691	185.255	159.237	216.291	209.055	198.768	186.705	198.38	237.673	228.476	198.386	198.279	197.766	1800.12	1530.34	1596.67	1632.79
sp|Q9Y6W3|CAN7_HUMAN	sp	Q9Y6W3	HUMAN	CAPN7	Calpain-7	4	6	1	0	7	13	10	6	281.717	294.516	251.775	256.516	235.329	245.454	292.457	245.327	273.4	277.64	273.222	300.387	279.15	254.566	233.342	254.646	246.362	179.855	227.081	238.417	202.768	217.156	230.418	229.707	227.135	231.45	229.159	267.51	242.554	222.591	237.677	208.661	940.169	998.046	972.002	959.716
sp|P04632|CPNS1_HUMAN	sp	P04632	HUMAN	CAPNS1	Calpain small subunit 1	41	36	1	0	27	29	28	27	3941.33	3413.69	3636.88	3616.32	3465.18	3489.58	3416.46	3539.69	3626.5	3480.37	3500.97	3698.86	3702.36	3740.16	4048.56	3759.36	3001.18	2743.67	2772.07	2657.96	2744.94	2663.8	2774.42	2779.77	2709.64	2617.46	2530.49	2836.94	2828.56	2847.39	3005.61	2909.76	5437.65	4650.74	4716.36	4811.07
sp|Q14444|CAPR1_HUMAN	sp	Q14444	HUMAN	CAPRIN1	Caprin-1	39	42	1	0	25	29	33	20	6055.4	6327.17	5875.82	5173.15	4768.28	4007.44	6440.33	6018.76	5608.74	5051.97	4253.73	6481.69	6280.56	5027.54	4509.52	3831.65	5939.72	6169.11	5693.31	5364.79	5003.51	4204.48	5994.92	5796.19	5452.6	4754.6	3612.51	6047.9	6136.27	6002.35	5480.57	4538.98	4182.79	4361.06	4315.31	4263.21
sp|Q13938|CAYP1_HUMAN	sp	Q13938	HUMAN	CAPS	Calcyphosin	3	0	0	1	3	0	1	1	389.746	312.463	319.628	333.624	289.306	319.603	337.462	294.778	320.416	315.791	326.631	379.231	355.251	360.425	354.877	395.408	0	0	0	0	0	0	0	0	0	0	0	0	0	0	0	0	344.71	330.503	304.476	318.501
sp|P52907|CAZA1_HUMAN	sp	P52907	HUMAN	CAPZA1	F-actin-capping protein subunit alpha-1	56	46	1	0	26	32	30	35	4945.18	5066.69	4986.59	4981.31	4790.63	4495.74	4988.43	4928.61	4995.78	4829.7	4768.7	5258.21	5244.22	5227.34	5362.78	5358.16	3201.94	3322.29	3114.91	3109.04	3205.09	3319.23	3131.95	3174.22	3158.75	3084.4	3022.76	3173.26	3155.32	3293.73	3239.16	3355.26	4074.85	4214.77	4087.12	3973.48
sp|P47755|CAZA2_HUMAN	sp	P47755	HUMAN	CAPZA2	F-actin-capping protein subunit alpha-2	30	33	1	0	27	17	15	22	2369.21	2486.43	2380.73	2379.59	2310.54	2174.53	2392.02	2385.63	2401.01	2337.96	2316.67	2476.2	2462.04	2485.6	2567.58	2549.7	2163.7	2003.65	2046.97	2060.19	2093.53	2085.46	2011.91	2059	2067.67	2041.69	2047.99	2142.56	2144.15	2113.41	2160.32	2219.41	3372.75	3716.2	3436.03	3591.39
sp|P47756|CAPZB_HUMAN	sp	P47756	HUMAN	CAPZB	F-actin-capping protein subunit beta	39	32	1	0	46	40	44	51	3982.16	4037.61	3780.46	3848.49	3869.18	3678.85	3893.57	3907.07	3769.68	3750.74	3767.66	4150.08	4088.67	4335.19	4127.83	4497.14	2332.85	2243.68	2232.33	2308.09	2361.22	2610.95	2232.9	2253.46	2236.12	2243.44	2158.94	2305.04	2354.96	2383.36	2319.59	2371.83	7420.11	7825.9	8530.86	7655.09
sp|P47756-2|CAPZB_HUMAN	sp	P47756-2	HUMAN	CAPZB	Isoform 2 of F-actin-capping protein subunit beta	12	9	1	0	7	3	4	5	2470.52	2207.42	2298.97	2273.91	2232.49	2148.44	2341.64	2190.02	2342.92	2322.38	2207.64	2234.68	2294.05	2315.12	2814.09	2378.72	1342.67	1449.54	1318.06	1281.86	1340.66	1350.46	1316.57	1361.86	1280.32	1289.03	1236.45	1360.31	1361.34	1387.03	1452.67	1239.05	1194.71	905.379	862.388	934.442
sp|Q96LW7-2|CAR19_HUMAN	sp	Q96LW7-2	HUMAN	CARD19	Isoform 2 of Caspase recruitment domain-containing protein 19	3	4	1	0	2	5	0	1	245.513	292.16	269.009	264.577	276.186	263.829	264.463	267.771	261.626	267.397	264.392	244.648	254.289	266.312	270.977	291.4	114.598	135.91	123.274	137.107	130.364	159.793	141.159	126.749	124.99	140.285	143.469	118.007	123.279	130.314	128.848	139.152	169.451	161.783	162.887	163.599
sp|Q9Y2G2-5|CARD8_HUMAN	sp	Q9Y2G2-5	HUMAN	CARD8	Isoform 5 of Caspase recruitment domain-containing protein 8	0	2	0	1	1	1	0	0	0	0	0	0	0	0	0	0	0	0	0	0	0	0	0	0	89.718	93.1179	98.9424	84.1372	89.3382	87.4128	82.8633	74.5385	91.0707	91.2919	89.235	82.8766	84.1324	82.5652	86.8938	93.8523	105.131	75.2263	104.267	152.937
sp|Q9H257|CARD9_HUMAN	sp	Q9H257	HUMAN	CARD9	Caspase recruitment domain-containing protein 9	2	0	0	1	2	3	0	4	49.7582	42.2783	44.0623	35.4792	38.8466	35.1642	51.9552	49.1758	42.3622	41.8598	36.6261	48.8466	43.3509	47.6127	40.4833	42.4763	0	0	0	0	0	0	0	0	0	0	0	0	0	0	0	0	164.055	184.511	205.807	188.663
sp|Q9Y2V2|CHSP1_HUMAN	sp	Q9Y2V2	HUMAN	CARHSP1	Calcium-regulated heat-stable protein 1	3	3	1	0	8	5	10	9	200.934	206.373	216.271	223.598	216.84	200.505	201.449	211.06	194.888	207.122	218.57	209.718	228.652	223.713	206.387	204.685	649.679	705.089	628.572	588.121	665.852	751.708	679.835	644.468	680.765	634.047	679.964	641.669	645.243	665.985	665.462	624.046	1310.09	1458.76	1463.84	1429.2
sp|Q86X55|CARM1_HUMAN	sp	Q86X55	HUMAN	CARM1	Histone-arginine methyltransferase CARM1	18	25	1	0	12	15	14	21	1756.05	1823.24	1772.8	1740.72	1714.3	1788.87	1774.19	1722.74	1686.13	1752.21	1684.7	1833.83	1729.92	1849.54	1898.78	1799.92	1910.14	1660.11	1878.43	1782	1749.04	1650.58	1727.13	1786.96	1770.29	1802.52	1841.27	1832.02	1831.81	1871.88	1903.64	1872.46	2125.46	2096.12	2033.92	1865.23
sp|Q5VZK9|CARL1_HUMAN	sp	Q5VZK9	HUMAN	CARMIL1	F-actin-uncapping protein LRRC16A	17	12	1	0	29	23	20	13	1153.45	1021.5	1078.89	1074.65	982.855	1157.54	1050.41	1019.89	1072.42	1069.49	1116.9	1055.63	1066.92	1105.42	1159.27	1224	480.985	402.571	457.165	456.398	443.474	452.194	491.352	486.857	451.5	454.884	447.445	492.583	470.707	500.301	458.46	509.263	5430.91	5455.03	5509.21	5081.37
sp|Q8N4J0|CARME_HUMAN	sp	Q8N4J0	HUMAN	CARNMT1	Carnosine N-methyltransferase	3	2	1	0	0	1	1	0	150.852	153.574	148.939	151.163	133.23	139.172	142.147	149.66	127.007	132.552	123.576	150.833	149.213	140.487	124.705	113.682	132.827	99.9592	120.66	116.287	118.924	119.109	139.334	123.89	109.004	125.965	102.404	143.046	136.133	132.571	123.485	120.751	0	0	0	0
sp|P49589-3|SYCC_HUMAN	sp	P49589-3	HUMAN	CARS	Isoform 3 of Cysteine--tRNA ligase, cytoplasmic	44	48	1	0	57	50	41	44	4268.85	3877.85	3923.33	3836.97	3821.77	3940.9	3910.88	3815.98	3822.96	3927.7	3956.39	4096.63	4023.14	4136.3	4232.09	4551.48	4806.41	4283.02	4638.96	4554.31	4463.51	4596.24	4450.34	4569.31	4437.87	4476.68	4387.74	4617.46	4624.82	4923.99	4802.1	4438.95	8157	9088.82	8756.75	8279.29
sp|Q9HA77|SYCM_HUMAN	sp	Q9HA77	HUMAN	CARS2	Probable cysteine--tRNA ligase, mitochondrial	8	10	1	0	7	8	6	6	539.768	541.41	559.413	516.256	545.183	590.07	544.514	529.04	509.556	498.629	547.971	546.465	513.159	548.149	529.073	604.836	430.574	400.096	447.382	407.572	386.124	408.704	422.721	389.965	394.32	445.319	456.383	394.683	408.229	427.448	429.59	412.573	1200.83	1192.43	1090.49	1130.29
sp|O15234|CASC3_HUMAN	sp	O15234	HUMAN	CASC3	Protein CASC3	1	2	1	0	7	10	8	8	81.6682	91.1494	102.5	94.0752	81.5527	66.0074	95.0047	89.2774	89.0528	92.3089	76.0328	88.8497	99.3869	106.211	105.372	90.736	32.8289	35.0724	34.277	36.4452	29.9183	27.5068	27.6023	25.4731	31.1424	29.5576	27.4984	28.6366	30.6882	36.2813	29.1205	30.6776	1122.64	1127.22	1145.07	1077.74
sp|Q6P4E1-4|CASC4_HUMAN	sp	Q6P4E1-4	HUMAN	CASC4	Isoform 4 of Protein CASC4	2	6	1	0	11	8	5	4	512.83	487.556	503.945	461.383	422.72	490.255	470.069	518.503	453.305	437.296	460.696	399.117	542.004	488.729	419.993	379.892	582.396	908.101	667.157	543.756	466.454	469.777	693.318	627.98	561.202	540.979	563.016	639.655	666.277	679.095	602.005	606.274	1281.37	1324.11	1390.21	1320.77
sp|Q8NG31|CASC5_HUMAN	sp	Q8NG31	HUMAN	CASC5	Protein CASC5	2	2	1	0	12	5	5	4	266.327	272.919	266.321	227.255	222.794	184.536	286.983	275.238	254.332	256.924	209.457	284.844	227.009	178.88	155.957	111.76	147.612	148.415	141.558	176.396	163.035	116.932	173.877	162.621	162.791	142	98.5152	151.749	166.352	120.199	120.716	122.57	1494.28	1824.19	1584.8	1678.36
sp|O14936|CSKP_HUMAN	sp	O14936	HUMAN	CASK	Peripheral plasma membrane protein CASK	5	4	1	0	10	15	13	9	611.448	552.762	561.716	546.077	522.074	620.328	563.722	600.959	580.538	636.385	708.414	564.991	551.259	589.21	627.88	651.796	141.905	133.047	147.956	139.13	139.569	149.917	153.585	141.308	149.48	150.534	153.315	132.966	137.531	155.981	148.569	158.293	1394.07	1404.98	1438.67	1353.58
sp|Q8WXD9|CSKI1_HUMAN	sp	Q8WXD9	HUMAN	CASKIN1	Caskin-1	1	1	1	0	0	1	1	0	89.1533	78.9452	83.7732	80.6376	79.4028	82.6921	84.119	75.4081	76.5873	79.5254	77.8093	87.9395	83.1986	96.4812	78.3156	86.1582	128.39	143.105	117.921	121.261	108.503	121.745	115.647	125.057	123.673	127.991	111.143	111.657	110.182	119.311	111.914	116.043	0	0	0	0
sp|Q8WXE0|CSKI2_HUMAN	sp	Q8WXE0	HUMAN	CASKIN2	Caskin-2	4	3	1	0	13	10	6	11	219.806	213.443	215.284	214.722	208.124	201.37	216.773	200.718	197.908	195.557	168.348	212.584	213.745	215.806	207.888	190.319	143.132	154.057	137.736	140.557	149.19	164.306	154.653	146.581	155.762	146.004	139.041	158.415	149.529	156.2	144.729	135.817	1513.15	1415.35	1347.31	1423.7
sp|P29466|CASP1_HUMAN	sp	P29466	HUMAN	CASP1	Caspase-1	16	22	1	0	6	8	7	9	965.177	838.198	869.528	911.814	815.956	942.007	863.927	846.458	900.32	856.994	1073.63	915.406	933.763	997.785	921.285	1215.6	1854.58	1158.74	1411.8	1391.6	1440	1702.76	1356.9	1341.73	1402.8	1452.56	1701.3	1449.07	1520.88	1695.11	2053.36	2669.39	1241.86	1626.46	1367.64	1406.75
sp|P42575|CASP2_HUMAN	sp	P42575	HUMAN	CASP2	Caspase-2	0	2	0	1	5	9	5	4	0	0	0	0	0	0	0	0	0	0	0	0	0	0	0	0	764.733	654.377	581.485	572.415	507.789	365.602	679.849	495.709	352.619	249.173	202.887	752.882	726.286	687.329	664.119	633.894	775.794	816.042	631.917	731.82
sp|P42574|CASP3_HUMAN	sp	P42574	HUMAN	CASP3	Caspase-3	25	20	1	0	20	7	6	10	1830.87	1777.63	1849.08	1792.47	1821.95	1656.9	1799.66	1858.36	1832.53	1826.98	1883.83	1920.63	1847.02	1996.65	2072.69	2105.28	1266.02	1246	1321.15	1236.55	1208	1128.2	1243.1	1396.95	1256.78	1294.59	1176.41	1296.75	1261.48	1306.55	1290.39	1353.77	2059	2207.38	2280.39	2191.96
sp|P49662|CASP4_HUMAN	sp	P49662	HUMAN	CASP4	Caspase-4	5	10	1	0	4	7	10	14	411.109	410.533	369.1	381.798	350.934	317.748	409.713	374.617	392.009	370.078	422.28	426.468	391.118	372.66	351.428	436.58	695.323	581.925	615.354	576.37	563.457	694.853	652.981	598.672	635.983	643.273	755.797	669.809	656.75	714.058	745.368	943.234	631.75	682.895	613.745	595.873
sp|P55212|CASP6_HUMAN	sp	P55212	HUMAN	CASP6	Caspase-6	6	2	1	0	3	7	2	5	507.764	491.117	488.344	501.999	447.823	500.826	498.263	491.255	497.1	505.069	489.408	509.048	512.119	518.738	503.625	501.601	466.044	577.504	560.5	482.894	460.972	330.701	504.727	547.324	486.317	499.366	454.637	536.294	522.269	459.182	476.414	427.681	317.472	313.455	347.854	301.424
sp|P55210-3|CASP7_HUMAN	sp	P55210-3	HUMAN	CASP7	Isoform Alpha' of Caspase-7	7	9	1	0	10	7	3	10	387.59	357.518	379.619	375.755	345.69	374.825	404.766	389.545	398.976	422.814	475.518	386.611	389.983	400.497	449.903	552.614	1127.57	1033.61	973.247	993.442	995.973	1171.16	1015.88	1003.15	1076.84	1073.14	1188.25	994.726	1114.88	1119.1	1385.45	1673.43	1157.9	1211.91	1308.73	1121.48
sp|Q14790-9|CASP8_HUMAN	sp	Q14790-9	HUMAN	CASP8	Isoform 9 of Caspase-8	1	2	1	0	2	5	4	3	50.755	53.6924	47.81	42.1601	41.7294	44.224	51.8087	54.5193	50.306	50.9019	48.2674	49.3643	55.5311	51.0762	54.5446	48.7133	134.604	118.799	113.401	109.465	106.671	95.3711	121.916	126.913	116.846	116.035	108.324	134.705	131.247	123.97	128.48	137.205	416.658	470.141	467.442	489.774
sp|Q9UKL3|C8AP2_HUMAN	sp	Q9UKL3	HUMAN	CASP8AP2	CASP8-associated protein 2	1	2	1	0	3	0	1	3	13.7911	15.5657	16.3825	15.9914	6.30416	8.11295	21.622	15.0528	21.445	17.71	16.1806	25.6391	15.3267	18.1562	14.4215	12.7348	92.6483	62.1339	88.5066	72.7437	75.7132	74.3489	91.6817	91.4602	71.8588	80.943	81.6364	103.098	105.238	106.331	108.788	88.7342	250.281	205.764	260.212	286.387
sp|P20810-6|ICAL_HUMAN	sp	P20810-6	HUMAN	CAST	Isoform 6 of Calpastatin	64	59	1	0	146	99	89	103	7669.09	6949.79	7093.21	7000.42	7350.03	6994.47	6855.75	6995.07	7203.12	7224.77	7372.81	7219.38	7504.96	7878.54	8319.6	7911.33	7051.16	6033.02	6252.35	6130.12	6631.11	6932.57	6218.22	6148.21	6444.17	6307.22	6356.12	6779.12	6606.69	6767.03	6920.62	7278.76	27112.2	26303	26516.6	26976.3
sp|P04040|CATA_HUMAN	sp	P04040	HUMAN	CAT	Catalase	16	15	1	0	18	26	23	23	1510.28	1438.01	1383.69	1390.6	1348.85	1514.07	1426.08	1302.11	1317.57	1312.36	1319.22	1479.71	1408.07	1436.98	1417.22	1455.37	1415.67	1313.35	1264.41	1272.09	1241.37	1457.31	1281.91	1251.14	1239.61	1316.81	1420.08	1317.85	1287	1307.94	1320.06	1253.59	4108.52	4041.47	4119.68	3714.81
sp|Q03135|CAV1_HUMAN	sp	Q03135	HUMAN	CAV1	Caveolin-1	30	22	1	0	44	26	26	50	5967.06	5689.52	6034.94	6104.78	5501.65	7152.65	5266.02	6949.29	6214.1	5940.65	6599.39	4046.25	5644.52	6534.43	5451.82	6236.89	2551.62	4366.21	3426.7	3265.83	3038.56	2397	2941.1	3059.11	3156.42	3270.48	3502.8	2784.69	2874.06	2841.22	2536.22	3013.1	11247.7	7058.73	9398.07	9873.58
sp|P51636|CAV2_HUMAN	sp	P51636	HUMAN	CAV2	Caveolin-2	5	4	1	0	6	3	1	2	397.714	523.466	453.236	423.672	364.875	471.072	482.865	579.12	411.785	449.45	458.402	340.088	428.836	522.639	394.171	458.261	184.562	376.344	311.133	286.435	283.805	183.447	247.822	263.28	258.165	312.262	268.474	221.759	247.528	222.802	204.099	256.447	1411.49	962.41	1552.36	1202.29
sp|O43439-4|MTG8R_HUMAN	sp	O43439-4	HUMAN	CBFA2T2	Isoform 4 of Protein CBFA2T2	0	1	0	1	0	1	2	0	0	0	0	0	0	0	0	0	0	0	0	0	0	0	0	0	32.7802	30.6016	23.2327	20.9902	14.8964	12.5033	27.2225	21.829	24.7717	23.4321	17.1716	38.0583	31.0032	41.4265	35.8788	45.6142	0	0	0	0
sp|Q13951|PEBB_HUMAN	sp	Q13951	HUMAN	CBFB	Core-binding factor subunit beta	7	3	1	0	1	1	0	1	688.669	876.701	782.277	728.77	774.714	623.779	805.613	739.33	760.615	709.311	681.08	794.318	758.109	683.788	667.755	603.909	418.325	452.016	395.063	397.275	377.652	435.106	407.55	408.693	400.153	382.904	377.049	422.648	436.053	424.139	400.48	410.307	240.804	225.155	192.166	218.705
sp|Q13951-2|PEBB_HUMAN	sp	Q13951-2	HUMAN	CBFB	Isoform 2 of Core-binding factor subunit beta	8	4	1	0	9	11	12	11	711.726	707.204	674.03	682.279	735.585	644.371	701.428	682.791	711.036	752.535	697.599	730.196	723.984	682.712	736.699	666.048	312.855	282.163	345.079	338.337	306.462	331.693	330.621	338.372	326.424	331.801	296.155	322.92	321.987	316.947	350.934	314.955	1225.6	1155.68	1005.31	1009.51
sp|P22681|CBL_HUMAN	sp	P22681	HUMAN	CBL	E3 ubiquitin-protein ligase CBL	8	10	1	0	14	13	5	8	720.947	699.021	672.488	680.534	671.563	609.862	719.868	671.718	692.937	658.797	637.594	693.242	747.744	728.215	720.993	720.484	574.066	570.814	558.237	568.567	511.862	549.041	583.624	566.107	580.243	562.527	516.116	588.018	606.41	558.664	583.17	576.124	1379.48	1531.94	1501.66	1413.87
sp|Q13191|CBLB_HUMAN	sp	Q13191	HUMAN	CBLB	E3 ubiquitin-protein ligase CBL-B	3	2	1	0	5	3	3	7	123.316	123.731	115.121	99.1401	96.0796	91.4167	109.83	104.795	101.399	99.8492	108.388	108.153	118.376	126.052	102.694	122.935	47.4308	39.1643	46.7473	48.2627	42.5103	46.6967	43.1788	44.0542	53.8866	47.3816	56.8484	51.8536	48.7418	52.2028	49.6522	39.4245	431.603	425.216	429.107	408.564
sp|Q75N03|HAKAI_HUMAN	sp	Q75N03	HUMAN	CBLL1	E3 ubiquitin-protein ligase Hakai	2	0	0	1	4	2	6	1	60.4073	68.7062	65.4711	61.8778	64.5987	48.4571	58.8432	65.3094	55.9778	61.9269	65.7269	69.498	70.3764	70.3421	61.7842	80.8312	0	0	0	0	0	0	0	0	0	0	0	0	0	0	0	0	190.386	268.962	246.872	242.217
sp|P16152|CBR1_HUMAN	sp	P16152	HUMAN	CBR1	Carbonyl reductase [NADPH] 1	65	59	1	0	31	39	37	34	7603.27	7155.87	7037.86	7097.78	7013.67	6685.51	7087.56	7026.16	7191.07	6820.71	7066.89	7393.33	7462.83	7677.41	7843.58	8264.21	4236.42	3790.56	3889.31	3824.49	3808.01	3931.33	3916.83	3903.02	3772.97	3699.15	3723.54	3988.62	3904.21	4090.35	4348.32	4687.55	6119.48	7031.2	7193.98	7274.88
sp|O75828|CBR3_HUMAN	sp	O75828	HUMAN	CBR3	Carbonyl reductase [NADPH] 3	35	35	1	0	23	28	25	21	2178.42	2146.62	2171.88	2141.14	2162.91	2033.02	2144.1	2169.86	2188.65	2005.54	2047.36	2271.43	2189.14	2316.27	2336.07	2397.01	2729.02	2651.73	2558.31	2553.13	2550.71	2481.91	2521.57	2525.12	2553.84	2483.65	2305.73	2640.88	2618.68	2638.16	2891.4	3046.63	3293.09	3503.99	3505.28	3334.26
sp|P35520-2|CBS_HUMAN	sp	P35520-2	HUMAN	CBS	Isoform 2 of Cystathionine beta-synthase	10	12	1	0	16	25	20	19	422.523	396.351	387.441	379.249	346.548	361.609	393.131	394.427	363.243	356.722	335.402	409.182	404.519	375.94	396.199	366.335	597.362	581.12	587.827	570.315	524.756	530.294	583.748	561.767	554.036	553.64	503.03	627.494	601.519	610.796	614.645	530.016	3087.08	3057.77	3130.29	3059.16
sp|Q9BRT8|CBWD1_HUMAN	sp	Q9BRT8	HUMAN	CBWD1	COBW domain-containing protein 1	3	1	1	0	5	3	1	2	253.021	259.011	237.817	221.942	206.988	206.512	256.565	248.085	237.999	212.355	220.664	258.457	246.703	219.586	233.041	196.66	85.7331	91.0045	78.987	81.7064	87.1923	90.0201	88.4703	91.3782	74.8907	66.0959	70.1866	87.7913	88.8076	93.6305	92.5293	127.066	676.931	801.789	740.947	768.432
sp|Q4V339|CBWD6_HUMAN	sp	Q4V339	HUMAN	CBWD6	COBW domain-containing protein 6	1	1	1	0	4	4	2	3	41.0049	39.2221	32.5139	34.4456	34.303	27.844	40.8044	40.812	32.0976	28.0024	30.7104	36.0413	40.6436	32.6957	26.7832	24.7286	34.8055	36.2896	43.0732	46.7751	43.2708	45.2584	38.4493	43.5656	46.3326	47.6557	46.1971	33.1556	34.6979	29.6331	32.87	28.4074	407.012	380.633	391.286	393.42
sp|P83916|CBX1_HUMAN	sp	P83916	HUMAN	CBX1	Chromobox protein homolog 1	19	17	1	0	19	12	14	18	1950.99	1944.45	1978.33	1944.86	1957.36	1854.8	1875.9	1926.92	1866.52	1826.54	1883.87	2045.95	1985.04	1957.58	2023.14	1988.57	1739.68	1506.82	1535.31	1624.44	1662.65	1595.48	1593.54	1645.35	1592.09	1559.95	1428.86	1716.17	1664.47	1713.71	1645.97	1614.84	2931.74	2614.54	2803.12	2574.82
sp|Q13185|CBX3_HUMAN	sp	Q13185	HUMAN	CBX3	Chromobox protein homolog 3	23	15	1	0	13	16	12	24	3225.44	3111.53	3176.8	3272.6	3217.21	3005.23	3154.06	3278.81	3290.73	3179.49	3022.24	3325.2	3438.43	3370.68	3359.92	3089.7	1299.04	1220.8	1209.02	1255.55	1247.57	1165.63	1264.12	1253.88	1209.23	1169.91	1137.45	1296.04	1301.11	1223.03	1236.89	1175.61	2677.38	2221.94	2458.53	2363.16
sp|P45973|CBX5_HUMAN	sp	P45973	HUMAN	CBX5	Chromobox protein homolog 5	25	16	1	0	15	29	23	20	2469.88	2375.24	2311.76	2189.1	2101.78	1897.94	2429.91	2392.98	2226.36	2150.53	2005.44	2577.29	2483.25	2442.99	2468.56	2247.55	1814.53	1893.12	1837.22	1776.94	1696.75	1486.48	1914.21	1914.17	1781.69	1667.38	1438.58	1982.82	1917.79	1847.72	1857.73	1635.17	2373.06	2604.21	2570.6	2542.2
sp|Q9HC52|CBX8_HUMAN	sp	Q9HC52	HUMAN	CBX8	Chromobox protein homolog 8	5	5	1	0	4	7	7	4	612.441	575.163	462.216	425.615	432.159	487.351	538.818	457.536	444.52	445.126	478.482	607.342	588.283	608.92	578.936	645.491	515.414	477.209	409.607	388.835	405.23	467.368	451.054	419.601	394.415	412.204	451.143	474.741	481.626	510.37	473.176	425.865	990.768	970.044	962.972	865.055
sp|Q9Y3M2|CBY1_HUMAN	sp	Q9Y3M2	HUMAN	CBY1	Protein chibby homolog 1	1	1	1	0	1	0	0	0	32.9528	33.0552	18.4204	21.8423	20.5235	22.4319	33.0399	29.2495	24.5307	24.6688	15.514	29.3173	32.1961	22.7755	21.2883	22.5306	72.3937	49.9872	47.8057	45.6141	35.7258	29.7321	60.6817	45.5053	42.3232	25.7878	23.706	58.6437	57.9951	64.685	58.2446	54.1626	87.091	80.6444	60.8206	63.9019
sp|Q6P1N0|C2D1A_HUMAN	sp	Q6P1N0	HUMAN	CC2D1A	Coiled-coil and C2 domain-containing protein 1A	14	15	1	0	32	28	23	24	866.081	819.018	801.174	734.324	708.366	772.048	824.242	763.378	769.573	749.854	768.288	854.499	800.619	763.222	722.732	720.266	1037.51	1081.95	999.986	959.657	981.357	1001.13	1037.92	1011.31	981.965	1012.08	976.562	1066.01	1052.68	1044.47	1021.5	947.431	4156.09	4403.65	4343.96	4203.51
sp|Q5T0F9-2|C2D1B_HUMAN	sp	Q5T0F9-2	HUMAN	CC2D1B	Isoform 2 of Coiled-coil and C2 domain-containing protein 1B	8	12	1	0	14	16	13	9	532.844	517.449	461.783	456.529	431.926	458.556	534.61	464.014	498.078	468.019	455.922	513.949	498.878	481.554	482.588	477.378	703.313	604.334	644.227	621.139	616.786	637.998	633.985	630.435	627.181	611.681	579.851	642.455	673.398	657.904	650.319	608.956	2095.74	2220.71	2080.65	2138.85
sp|Q8IX12|CCAR1_HUMAN	sp	Q8IX12	HUMAN	CCAR1	Cell division cycle and apoptosis regulator protein 1	22	23	1	0	36	26	29	30	2471.58	2411.48	2394.82	2347.62	2350.2	2463.68	2424.23	2353.66	2295.62	2397.55	2407.43	2427.3	2366.1	2496.95	2533.26	2550.48	2525.52	2395.71	2444.3	2550.38	2590.51	2772.25	2579.12	2459.23	2616.67	2646.96	2713.1	2605.29	2615.14	2671.33	2554.09	2483.9	5044.7	5225.34	5540.05	4880.7
sp|Q8N163|CCAR2_HUMAN	sp	Q8N163	HUMAN	CCAR2	Cell cycle and apoptosis regulator protein 2	51	40	1	0	44	52	51	51	5026.36	4752.95	4820.39	4821.75	4819.19	4931.41	4805.1	4730.31	4745.49	4834.47	4732.26	4972.12	4970.67	5068.52	5272.6	5104.95	3570.5	3435.72	3377.05	3189.32	3414.14	3447.39	3407.15	3400.85	3286.28	3397.8	3515.5	3489.9	3468.62	3490.29	3509.99	3273.81	5811.22	6081.46	6550.6	6134.6
sp|Q96A19|C102A_HUMAN	sp	Q96A19	HUMAN	CCDC102A	Coiled-coil domain-containing protein 102A	2	0	0	1	9	3	1	2	606.394	503.509	483.911	458.294	411.92	434.628	512.407	477.792	440.636	422.425	439.686	540.484	532.813	475.469	427.017	457.049	0	0	0	0	0	0	0	0	0	0	0	0	0	0	0	0	931.426	934.355	920.514	888.329
sp|Q96NT0|CC115_HUMAN	sp	Q96NT0	HUMAN	CCDC115	Coiled-coil domain-containing protein 115	1	0	0	1	0	1	1	2	154.232	143.529	139.753	137.835	116.866	117.326	158.028	137.174	141.622	113.297	110.012	144.059	144.306	147.168	122.227	132.939	0	0	0	0	0	0	0	0	0	0	0	0	0	0	0	0	0	0	0	0
sp|Q96NT0-2|CC115_HUMAN	sp	Q96NT0-2	HUMAN	CCDC115	Isoform 2 of Coiled-coil domain-containing protein 115	0	1	0	1	1	2	3	1	0	0	0	0	0	0	0	0	0	0	0	0	0	0	0	0	99.8261	81.7698	80.0848	98.8014	91.8089	106.747	97.7166	89.2477	95.068	84.6277	84.2156	86.7902	86.4267	105.528	99.244	94.9165	29.0779	39.3968	40.2619	30.2542
sp|Q8WUD4|CCD12_HUMAN	sp	Q8WUD4	HUMAN	CCDC12	Coiled-coil domain-containing protein 12	2	2	1	0	5	4	5	7	372.722	324.166	325.205	311.812	310.102	278.395	344.994	316.313	338.415	368.977	349.309	368.509	344.201	307.038	337.927	301.657	105.935	56.3775	69	77.8543	103.47	84.6219	69.8388	62.0097	95.3632	85.4204	89.0379	70.8988	93.7212	95.1779	103.145	90.3273	675.589	692.535	495.931	642.953
sp|Q96CT7|CC124_HUMAN	sp	Q96CT7	HUMAN	CCDC124	Coiled-coil domain-containing protein 124	23	12	1	0	19	15	13	15	1915.96	1817.4	1830.17	1835.55	1761.33	1743.42	1805.15	1780.88	1826.6	1767.63	1725.3	1871.94	1890	1859.51	1991.62	1854.1	725	758.295	744.326	739.351	794.503	852.42	799.424	749.257	752.205	731.453	723.697	749.308	748.024	750.775	750.819	654.045	3025.19	3034.4	3230.15	2892.56
sp|Q96BQ5|CC127_HUMAN	sp	Q96BQ5	HUMAN	CCDC127	Coiled-coil domain-containing protein 127	1	1	1	0	0	4	3	2	181.963	172.542	179.342	176.652	182.158	194.93	188.079	164.888	179.121	171.049	194.994	176.98	182.391	205.526	182.167	200.006	61.5576	45.4924	60.6566	52.8745	58.0952	46.7036	51.2572	51.1487	47.0576	59.7184	67.0495	57.1221	49.1531	45.6738	65.1201	68.2642	0	0	0	0
sp|P13994|CC130_HUMAN	sp	P13994	HUMAN	CCDC130	Coiled-coil domain-containing protein 130	1	2	1	0	2	4	0	0	27.7402	24.5162	16.9025	16.221	11.8133	18.8513	23.6696	16.1267	20.2116	15.6417	16.3746	27.096	22.2222	20.6837	25.3015	29.9879	102.901	83.2818	77.3457	80.2542	62.461	64.082	74.3904	69.4509	57.3462	50.5584	51.4796	94.4295	89.2828	95.8965	102.023	120.988	250.309	175.541	200.382	222.283
sp|Q9H6E4|CC134_HUMAN	sp	Q9H6E4	HUMAN	CCDC134	Coiled-coil domain-containing protein 134	5	3	1	0	6	4	7	3	320.067	338.516	329.902	297.541	300.493	308.305	330.029	295.27	287.469	284.897	287.374	331.072	331.735	335.29	318.423	288.823	86.6689	85.0963	89.5868	86.1663	76.7123	68.5954	95.7029	87.7231	82.3533	80.5574	77.4483	83.5562	91.2272	79.4563	83.4595	80.4509	1303.47	1271.12	1332.7	1251.37
sp|Q6PK04|CC137_HUMAN	sp	Q6PK04	HUMAN	CCDC137	Coiled-coil domain-containing protein 137	1	4	1	0	6	9	6	5	49.0729	56.2028	46.8037	40.4771	16.9217	19.7997	60.1696	45.893	45.8059	40.3195	46.3412	66.4714	54.8755	37.5243	37.1012	38.272	177.433	142.577	128.496	87.2926	67.9689	47.3141	158.189	140.975	125.401	119.365	138.169	157.197	163.419	161.364	158.475	159.664	1155.77	1069.92	1016.29	1064.73
sp|Q6PII3|CC174_HUMAN	sp	Q6PII3	HUMAN	CCDC174	Coiled-coil domain-containing protein 174	1	1	1	0	5	6	4	5	120.624	102.885	106.702	105.206	92.8695	99.1303	119.129	112.437	111.786	129.857	126.008	113.709	113.634	93.5272	102.378	124.018	22.2149	15.8973	18.4398	15.4113	12.6505	12.8139	13.5161	17.5735	16.3829	20.7046	19.8398	18.6728	16.2269	20.4007	17.817	19.618	656.331	619.991	668.353	632.26
sp|Q5T9S5|CCD18_HUMAN	sp	Q5T9S5	HUMAN	CCDC18	Coiled-coil domain-containing protein 18	1	1	1	0	0	2	1	0	23.872	26.5243	24.1007	24.2011	22.6241	21.2768	20.6231	29.2592	21.5354	24.6007	19.3792	28.4156	27.1626	22.1628	16.725	18.5578	46.4138	52.3555	45.0011	43.5348	43.8942	31.5636	55.8397	54.0313	49.0557	47.5959	43.723	54.894	48.6525	48.5489	47.128	43.1974	0	0	0	0
sp|Q7Z3E2|CC186_HUMAN	sp	Q7Z3E2	HUMAN	CCDC186	Coiled-coil domain-containing protein 186	2	3	1	0	8	7	10	12	49.7332	47.1447	50.2799	44.3201	33.1529	36.0332	46.6315	52.087	47.99	48.6038	55.5138	46.485	44.4065	43.4465	34.2481	47.867	83.7324	90.4506	81.0081	78.0191	65.7324	67.6375	85.8289	84.4897	77.3342	79.0448	95.4687	84.4651	94.6534	98.8396	76.2287	80.4541	923.336	922.312	1009.83	920.162
sp|O60826|CCD22_HUMAN	sp	O60826	HUMAN	CCDC22	Coiled-coil domain-containing protein 22	16	16	1	0	23	11	17	19	1273.29	1233.67	1208.79	1221.13	1147.41	1192.74	1283.57	1173.14	1182.91	1148.86	1195.23	1315.29	1218.32	1260.06	1241.18	1290.89	1097.16	944.491	1005.96	1010.58	976.438	1084.19	1029.08	988.911	990.207	1011.05	982.338	1020.95	1048.91	1000.85	1088.76	1071.12	3084.88	3373.24	3304.87	2991.79
sp|Q86WR0|CCD25_HUMAN	sp	Q86WR0	HUMAN	CCDC25	Coiled-coil domain-containing protein 25	8	10	1	0	9	5	8	6	599.735	547.363	553.183	546.145	541.841	542.061	558.29	558.283	557.11	494.358	560.854	560.724	564.564	557.328	544.276	546.926	1199.93	1080.71	1102.07	1104.18	1082.86	1130.13	1119.95	1075.74	1109.53	1078.67	1003.87	1148.31	1154.72	1130.98	1091.04	900.312	1354.17	1366.09	1412.62	1376.79
sp|Q96MW1|CCD43_HUMAN	sp	Q96MW1	HUMAN	CCDC43	Coiled-coil domain-containing protein 43	6	4	1	0	13	5	5	7	521.43	484.597	496.848	472.553	491.187	465.944	507.444	505.405	501.044	506.058	540.512	517.046	515.741	520.344	549.323	556.792	488.525	439.97	474.707	470.57	453.144	441.907	479.248	469.694	488.706	486.13	460.357	475.261	462.287	469.269	470.971	446.215	2844.58	2636.81	2627.1	2425.73
sp|Q96A33|CCD47_HUMAN	sp	Q96A33	HUMAN	CCDC47	Coiled-coil domain-containing protein 47	31	23	1	0	23	35	31	40	2675.23	2684.9	2773.53	2671.53	2571.48	2739.24	2689.84	2695.46	2747.56	2752.85	2795.74	2548.06	2719.36	2762.15	2715.78	2671.8	1250.65	1291.72	1274.67	1244.7	1186.75	1200.62	1277.54	1236.77	1226.53	1348.17	1294.66	1345.03	1293.31	1235.13	1283.52	1294.46	4387.42	3557.75	4370.49	4045.91
sp|Q8IVM0-2|CCD50_HUMAN	sp	Q8IVM0-2	HUMAN	CCDC50	Isoform 2 of Coiled-coil domain-containing protein 50	10	6	1	0	13	4	5	11	860.321	806.72	777.779	673.666	632.943	585.668	801.801	746.222	733.289	710.27	680.722	892.277	838.713	738.863	738.383	674.066	821.83	703.163	636.064	622	589.096	573.141	734.282	624.768	607.954	604.938	565.541	821.96	792.638	781.933	808.798	678.451	1782.38	1855.28	1901.84	1819.07
sp|Q96ER9|CCD51_HUMAN	sp	Q96ER9	HUMAN	CCDC51	Coiled-coil domain-containing protein 51	5	2	1	0	2	6	3	3	244.582	267.115	252.769	246.135	223.822	270.396	260.609	266.477	227.266	229.049	261.805	242.541	263.526	285.533	250.349	265.817	265.605	315.307	263.837	256.758	213.138	225.698	262.706	250.173	233.675	223.185	286.952	241.274	270.707	247.972	260.891	256.89	241.176	248.752	242.062	267.018
sp|Q9Y3C0|CCD53_HUMAN	sp	Q9Y3C0	HUMAN	CCDC53	WASH complex subunit CCDC53	6	11	1	0	8	6	5	4	482.348	473.869	456.995	442.4	450.924	453.983	485.646	464.284	443.236	439.719	439.825	473.796	452.887	420.859	396.823	410.918	548.494	563.676	539.314	532.175	533.408	547.283	556.314	537.501	540.735	501.881	502.891	549.498	534.414	568.581	560.163	497.75	1847.42	1799.21	1694.75	1728.06
sp|Q2TAC2|CCD57_HUMAN	sp	Q2TAC2	HUMAN	CCDC57	Coiled-coil domain-containing protein 57	0	2	0	1	2	2	3	2	0	0	0	0	0	0	0	0	0	0	0	0	0	0	0	0	218.399	201.69	202.34	212.684	207.483	227.739	196.284	190.524	201.633	209.137	214.164	212.669	204.956	215.945	218.106	215.309	365.799	389.625	343.056	323.388
sp|Q4VC31|CCD58_HUMAN	sp	Q4VC31	HUMAN	CCDC58	Coiled-coil domain-containing protein 58	8	4	1	0	6	6	6	7	1078.48	1022.04	1058.37	1050.23	1054.21	1204.54	1060.2	1014.7	1074.63	1123.69	1124.83	1059.79	1047.82	1083.64	1186.39	1139.93	285.603	281.413	260.445	273.477	280.375	320.508	256.503	267.686	272.702	310.781	351.57	254.813	271.591	263.991	278.407	282.55	1931.3	1749.39	1747.81	1573.46
sp|Q9P031|TAP26_HUMAN	sp	Q9P031	HUMAN	CCDC59	Thyroid transcription factor 1-associated protein 26	1	1	1	0	2	3	4	2	54.6793	54.2119	48.9502	34.7205	31.6445	31.5297	47.988	48.9647	36.9936	41.9132	47.2892	58.2367	57.1706	47.4288	41.0572	50.6192	126.314	113.389	93.9196	71.2261	64.6267	52.8916	120.032	108.78	89.444	102.412	145.873	117.314	123.782	127.075	109.885	120.58	230.316	218.008	227.2	209.312
sp|Q16204|CCDC6_HUMAN	sp	Q16204	HUMAN	CCDC6	Coiled-coil domain-containing protein 6	10	13	1	0	15	17	14	25	819.7	740.746	781.633	781.349	818.166	781.992	782.581	763.75	786.728	781.229	787.997	812.811	793.639	801.272	898.33	896.985	1364.71	1277.64	1298.22	1231.2	1300.71	1411.14	1263.82	1211.7	1255.87	1292.97	1299.07	1352.78	1289.65	1333.46	1438.89	1443.61	2941.58	3217.86	3037.95	3053.51
sp|Q9Y6R9|CCD61_HUMAN	sp	Q9Y6R9	HUMAN	CCDC61	Coiled-coil domain-containing protein 61	1	0	0	1	1	2	2	1	39.3955	44.8082	23.2707	24.4553	26.8763	19.1981	38.2834	33.5414	31.2369	28.9124	26.9365	36.841	37.9506	35.624	32.5733	26.3482	0	0	0	0	0	0	0	0	0	0	0	0	0	0	0	0	110.302	48.6806	69.3604	84.5409
sp|Q8N9Z2|CC71L_HUMAN	sp	Q8N9Z2	HUMAN	CCDC71L	Coiled-coil domain-containing protein 71L	3	1	1	0	5	5	6	0	161.502	163.058	124.529	103.307	96.184	89.0473	139.098	117.484	129.398	119.086	121.389	175.386	152.483	135.054	136.854	130.401	78.1302	61.1664	52.5576	47.6789	41.8122	39.4999	53.551	58.9813	51.0314	60.7164	68.9248	66.4543	85.1663	86.9379	89.5205	89.585	488.288	461.553	424.842	435.744
sp|Q9BR77|CCD77_HUMAN	sp	Q9BR77	HUMAN	CCDC77	Coiled-coil domain-containing protein 77	0	2	0	1	1	3	1	1	0	0	0	0	0	0	0	0	0	0	0	0	0	0	0	0	45.9775	49.956	41.2273	35.5885	29.4062	20.5843	54.408	44.4263	35.1917	32.1108	25.4603	60.6351	53.5445	49.3322	51.2906	56.6418	83.1213	94.5353	82.8204	81.665
sp|Q76M96-2|CCD80_HUMAN	sp	Q76M96-2	HUMAN	CCDC80	Isoform 2 of Coiled-coil domain-containing protein 80	5	4	1	0	15	29	21	15	704.548	518.61	450.19	418.747	327.141	396.913	534.743	516.324	477.436	406.352	485.638	604.038	653.604	605.526	452.652	469.965	862.878	607.005	513.309	439.858	350.388	502.816	582.469	455.485	512.042	381.51	399.297	750.902	780.141	750.445	698.155	611.525	1789.83	2120.7	2325.37	1618.84
sp|Q96PX6|CC85A_HUMAN	sp	Q96PX6	HUMAN	CCDC85A	Coiled-coil domain-containing protein 85A	1	1	1	0	2	1	1	3	26.3748	26.2531	27.1978	22.2606	27.4168	24.0212	26.3974	23.0446	15.9689	18.2847	20.872	38.233	21.9895	24.607	19.4474	19.3322	6.38907	23.0692	30.6843	34.1677	40.837	43.0153	19.4333	37.6906	62.9236	66.9943	69.7943	6.99737	7.06918	8.52172	6.60988	7.71625	104.084	82.1533	80.1277	76.5534
sp|Q9H6F5|CCD86_HUMAN	sp	Q9H6F5	HUMAN	CCDC86	Coiled-coil domain-containing protein 86	2	3	1	0	11	13	10	11	108.178	128.398	104.207	82.3759	81.1173	70.1771	114.416	109.033	95.7664	105.667	68.9646	130.527	117.162	112.403	119.219	117.429	291.143	264.482	219.076	200.66	188.784	168.259	253.663	242.258	263.05	261.25	243.297	276.226	275.117	284.414	294.83	278.671	2995.22	3014.18	2708.48	3112.36
sp|Q3V6T2|GRDN_HUMAN	sp	Q3V6T2	HUMAN	CCDC88A	Girdin	15	23	1	0	35	30	33	40	1252.87	1268.82	1247.49	1229.67	1177.29	1186.88	1248.54	1230.59	1207.25	1232.11	1183.08	1266.11	1266.96	1256.04	1241.63	1160.91	1630.12	1702.33	1609.31	1660.58	1537.87	1551.83	1675.34	1657.32	1614.35	1629.75	1551.96	1652.83	1707.73	1614.39	1603.97	1405.4	4942.37	5101.04	4854.67	4713.84
sp|Q9Y3X0|CCDC9_HUMAN	sp	Q9Y3X0	HUMAN	CCDC9	Coiled-coil domain-containing protein 9	4	4	1	0	10	11	10	13	217.555	206.472	229.686	205.289	205.934	201.663	232.375	209.362	209.731	225.388	187.42	227.809	230.76	205.946	240.369	215.876	269.643	215.011	241.866	258.549	263.117	227.685	214.464	228.807	236.75	269.285	234.347	242.123	250.818	242.83	278.081	276.061	1663.06	1773.28	1727.42	1626.75
sp|Q9GZT6|CC90B_HUMAN	sp	Q9GZT6	HUMAN	CCDC90B	Coiled-coil domain-containing protein 90B, mitochondrial	10	6	1	0	2	4	5	5	1455.8	1240.6	1298.69	1281.82	1234.03	1421.79	1365.63	1336.71	1286.47	1344.47	1464.65	1358.45	1366.41	1352.09	1370.75	1387.51	554.056	612.959	531.427	524.075	505.538	550.705	528.349	480.801	496.461	506.336	607.588	541.011	570.613	527.309	536.878	528.648	405.706	385.71	322.874	373.929
sp|Q7Z6B0|CCD91_HUMAN	sp	Q7Z6B0	HUMAN	CCDC91	Coiled-coil domain-containing protein 91	4	4	1	0	10	4	7	8	483.737	462.859	429.13	436.726	420.404	404.783	461.001	417.112	429.957	444.731	412.47	501.392	483.361	468.176	461.072	460.053	636.947	627.962	574.817	594.032	536.097	553.471	623.445	601.141	586.342	579.664	550.524	648.038	630.966	657.678	655.489	642.839	1745.3	1820.24	1734.32	1758.58
sp|Q53HC0|CCD92_HUMAN	sp	Q53HC0	HUMAN	CCDC92	Coiled-coil domain-containing protein 92	3	2	1	0	1	2	2	3	381.567	336.901	321.534	286.981	282.478	288.605	325.635	317.169	299.68	272.312	250.829	345.84	327.039	291.611	292.071	240.446	284.862	238.763	197.345	208.782	187.629	219.622	233.277	223.359	193.04	198.505	224.035	238.294	262.76	288.229	277.134	211.285	166.079	152.312	175.162	149.337
sp|Q567U6|CCD93_HUMAN	sp	Q567U6	HUMAN	CCDC93	Coiled-coil domain-containing protein 93	14	20	1	0	19	19	16	22	1538.54	1480.71	1467.99	1461.68	1420.51	1533.32	1470.8	1460.45	1499.14	1463.58	1565.1	1539.83	1543.58	1629.68	1601.92	1727.71	2401.18	2302.01	2169.61	2184.85	2191.54	2543.51	2265.62	2198.58	2234.75	2263.59	2359.78	2205.82	2276.41	2264.36	2358.41	2401.42	3036.85	2961	3029.25	2903.69
sp|Q9BW85|CCD94_HUMAN	sp	Q9BW85	HUMAN	CCDC94	Coiled-coil domain-containing protein 94	3	3	1	0	6	10	9	12	273.491	254.088	253.139	253.135	242.777	208.701	259.384	250.966	241.852	240.744	229.812	282.442	255.625	254.519	253.77	234.397	359.107	308.826	315.987	323.287	338.518	317.582	338.361	329.164	327.529	336.623	293.897	349.457	332.667	363.013	341.884	306.382	805.181	892.083	1000	850.545
sp|Q96F63|CCD97_HUMAN	sp	Q96F63	HUMAN	CCDC97	Coiled-coil domain-containing protein 97	1	1	1	0	0	2	1	1	70.4031	76.3042	70.3758	64.7383	54.1615	60.2228	71.7784	63.4972	54.8983	59.2226	57.3086	74.6516	74.6568	72.2673	48.9171	53.5302	80.6325	77.7102	83.0835	71.1927	75.8816	59.0856	77.321	86.6565	81.8844	67.9392	69.6277	70.765	75.6142	80.39	79.7756	74.4048	0	0	0	0
sp|Q8TD31-2|CCHCR_HUMAN	sp	Q8TD31-2	HUMAN	CCHCR1	Isoform 2 of Coiled-coil alpha-helical rod protein 1	1	1	1	0	2	2	0	0	137.336	124.619	63.6428	64.3828	52.431	38.7003	102.581	85.8799	60.794	50.1493	58.5814	141.688	104.634	79.169	47.5282	70.691	98.1958	66.5938	67.1561	56.2927	41.0778	41.1478	88.7456	69.1301	57.779	49.9838	38.8876	98.5558	96.9389	84.0165	90.255	53.91	181.198	203.667	202.067	237.516
sp|Q9BSQ5-2|CCM2_HUMAN	sp	Q9BSQ5-2	HUMAN	CCM2	Isoform 2 of Cerebral cavernous malformations 2 protein	3	2	1	0	3	2	1	0	239.455	243.769	237.561	238.061	233.323	248.501	253.668	235.724	226.113	223.326	224.767	240.751	254.676	231.629	261.885	258.153	383.657	405.725	333.159	321.145	341.389	379.405	368.62	378.008	337.503	343.335	381.755	369.374	371.26	376.841	371.455	350.207	251.328	144.124	196.298	203.83
sp|P20248|CCNA2_HUMAN	sp	P20248	HUMAN	CCNA2	Cyclin-A2	1	1	1	0	7	2	7	5	135.38	155.747	142.338	125.913	128.007	97.0727	142.716	131.24	130.861	124.406	123.411	157.73	136.749	125.977	105.457	93.6598	20.5198	13.0218	12.2845	14.6115	12.2655	17.0898	19.2832	19.1131	14.0706	12.2677	11.8987	19.5008	18.952	14.1377	15.1819	17.9327	942.185	1062.53	634.457	993.583
sp|P14635|CCNB1_HUMAN	sp	P14635	HUMAN	CCNB1	G2/mitotic-specific cyclin-B1	7	1	1	0	6	4	10	4	555.758	652.906	620.227	546.255	575.924	436.652	628.606	620.635	671.081	689.096	575.283	672.702	484.566	442.145	456.961	407.524	32.7209	41.9237	34.5947	49.9832	43.3431	25.9876	54.2039	40.7778	35.867	49.2153	25.9916	56.5368	56.771	39.5872	45.6125	77.6001	740.744	1127.97	641.18	952.066
sp|O95067|CCNB2_HUMAN	sp	O95067	HUMAN	CCNB2	G2/mitotic-specific cyclin-B2	7	2	1	0	5	1	3	1	320.658	388.131	368.746	313.929	292.278	245.933	357.285	371.558	361.054	368.612	326.938	406.509	308.303	241.131	180.912	147.745	79.9006	94.7657	83.5826	75.6059	83.9574	57.0489	106.008	94.1435	82.8919	76.279	50.3261	109.815	104.51	85.4407	77.9172	78.9088	442.014	548.127	361.717	479.217
sp|Q8WWL7|CCNB3_HUMAN	sp	Q8WWL7	HUMAN	CCNB3	G2/mitotic-specific cyclin-B3	2	0	0	1	0	0	1	1	184.257	176.631	182.682	157.084	185.269	199.271	175.884	174.704	164.224	177.499	177.569	180.499	171.969	194.645	181.422	179.491	0	0	0	0	0	0	0	0	0	0	0	0	0	0	0	0	0	0	0	0
sp|P24863|CCNC_HUMAN	sp	P24863	HUMAN	CCNC	Cyclin-C	0	1	0	1	1	1	1	2	0	0	0	0	0	0	0	0	0	0	0	0	0	0	0	0	186.628	203.753	210.052	193.245	175.738	132.836	218.753	176.094	170.669	195.597	169.29	219.536	202.705	175.107	176.99	183.025	59.1922	74.2563	65.0266	53.8784
sp|O95273|CCDB1_HUMAN	sp	O95273	HUMAN	CCNDBP1	Cyclin-D1-binding protein 1	3	0	0	1	1	3	0	2	452.266	455.26	433.864	340.24	282.831	213.634	503.394	407.163	416.532	437.808	412.913	525.708	429.727	291.278	295.149	289.223	0	0	0	0	0	0	0	0	0	0	0	0	0	0	0	0	132.97	221.527	179.777	194.441
sp|P51946|CCNH_HUMAN	sp	P51946	HUMAN	CCNH	Cyclin-H	1	2	1	0	5	4	4	6	33.0134	36.3637	32.4122	31.3786	31.6583	29.8072	41.3537	27.1636	37.0402	33.9334	35.6833	38.175	37.9346	34.4493	32.3886	30.7943	106.644	120.804	105.811	109.53	112.709	98.4274	106.738	120.538	102.329	110.912	120.615	121.998	120.502	114.935	113.37	94.7784	569.302	588.865	543.289	575.298
sp|O75909|CCNK_HUMAN	sp	O75909	HUMAN	CCNK	Cyclin-K	6	4	1	0	3	6	4	8	237.194	208.881	229.218	210.728	190.257	181.298	198.67	179.874	203.24	202.615	173.768	224.25	211.037	230.437	207.243	208.971	278.935	268.537	269.852	289.225	252.513	181.383	272.595	276.436	254.153	254.051	198.856	281.324	279.966	261.843	263.323	241.793	481.863	513.017	548.842	520.037
sp|Q9UK58|CCNL1_HUMAN	sp	Q9UK58	HUMAN	CCNL1	Cyclin-L1	2	0	0	1	3	4	2	2	95.8241	87.8563	100.113	105.924	89.8628	99.5921	84.6108	96.0508	118.216	136.587	163.839	103.738	107.633	105.564	124.032	139.862	0	0	0	0	0	0	0	0	0	0	0	0	0	0	0	0	508.409	373.26	472.162	447.181
sp|O60563|CCNT1_HUMAN	sp	O60563	HUMAN	CCNT1	Cyclin-T1	1	1	1	0	3	8	5	7	91.4866	73.7427	85.8502	88.3531	87.3717	78.0978	81.819	79.4029	77.2892	84.8154	92.6959	89.0608	88.2433	79.737	83.2918	93.592	38.5943	45.6872	34.7331	36.7899	35.7937	33.816	38.7524	37.6494	38.1888	36.992	38.7374	32.9734	39.1135	41.0077	40.429	37.2891	254.67	264.516	259.042	260.127
sp|Q8ND76|CCNY_HUMAN	sp	Q8ND76	HUMAN	CCNY	Cyclin-Y	1	1	1	0	1	3	1	2	56.0161	59.4405	55.4449	61.6493	60.1605	71.467	60.1478	73.916	58.4269	63.2862	58.4568	52.781	54.0942	62.091	60.5785	55.6513	35.4679	37.9671	42.4967	36.3666	36.7604	30.9037	39.2361	31.1317	42.6397	38.4703	34.4054	34.8	39.4366	33.0202	37.8172	33.5117	254.435	145.092	201.952	234.048
sp|Q8N7R7|CCYL1_HUMAN	sp	Q8N7R7	HUMAN	CCNYL1	Cyclin-Y-like protein 1	1	1	1	0	9	5	2	4	68.5529	57.5769	72.074	79.4431	60.8097	78.7531	60.5968	75.5661	65.9368	69.3881	74.5304	54.6637	64.298	68.9419	73.7156	60.7957	154.227	356.946	256.675	239.835	231.85	204.855	238.14	240.919	252.055	252.299	249.747	175.649	188.503	188.823	188.064	245.016	1520.11	1422.25	1478.71	1469.78
sp|O43303|CP110_HUMAN	sp	O43303	HUMAN	CCP110	Centriolar coiled-coil protein of 110 kDa	5	3	1	0	5	8	5	1	609.787	593.912	589.36	555.031	513.949	449.35	628.987	573.727	520.12	478.092	413.628	686.292	601.44	605.742	614.595	538.065	258.737	228.493	218.39	213.16	200.132	198.161	250.005	233.884	226.548	208.315	185.489	248.641	259.14	256.747	251.608	244.45	473.12	463.666	444.525	498.538
sp|Q9ULG6-5|CCPG1_HUMAN	sp	Q9ULG6-5	HUMAN	CCPG1	Isoform 5 of Cell cycle progression protein 1	3	7	1	0	9	12	7	4	118.618	115.924	112.431	115.445	103.31	93.4808	113.453	118.181	100.971	103.254	105.802	98.3303	85.8798	78.6705	60.6793	71.257	409.647	471.865	439.373	417.763	396.449	370.395	497.907	448.978	434.542	428.562	427.731	514.689	500.152	464.17	404.792	456.044	1547.29	1206.54	1398.46	1508.02
sp|O14618|CCS_HUMAN	sp	O14618	HUMAN	CCS	Copper chaperone for superoxide dismutase	6	8	1	0	10	6	5	4	324.394	306.738	278.816	282.788	238.564	257.822	317.545	273.45	270.868	256.367	259.808	311.211	293.095	308.255	285.589	276.327	656.613	583.147	536.564	547.297	541.029	587.993	569.406	556.744	541.272	501.958	493.263	606.805	601.211	617.734	650.731	589.554	1392.56	1377.33	1391.46	1362.46
sp|Q9H7U1-3|CCSE2_HUMAN	sp	Q9H7U1-3	HUMAN	CCSER2	Isoform 3 of Serine-rich coiled-coil domain-containing protein 2	1	1	1	0	4	1	0	3	51.7821	50.7753	46.9174	45.609	36.9093	44.2532	43.528	43.4288	47.9459	43.986	35.5691	56.0991	49.8039	44.2125	47.1463	36.8428	75.3569	70.783	59.6117	66.8037	51.173	50.9631	60.8257	65.6675	62.4296	58.6324	39.6191	62.6398	77.6729	63.7715	80.3016	56.2825	666.467	716.039	644.138	702.713
sp|P78371|TCPB_HUMAN	sp	P78371	HUMAN	CCT2	T-complex protein 1 subunit beta	114	97	1	0	89	124	91	108	13079	12876.5	12644	12525	12800.9	12863.3	12761.8	12567.3	12600.3	12683.8	12995	12995.2	13113	13298.9	13841.8	14077.2	9983.47	9375.86	9672.21	9679.26	9858.68	10289.1	9904.42	9761.91	9716.51	9592.59	9608.78	9908.84	9912.39	10004.2	9920.57	9506.73	13483.4	14019.8	14404.2	14388.6
sp|P49368|TCPG_HUMAN	sp	P49368	HUMAN	CCT3	T-complex protein 1 subunit gamma	124	117	1	0	103	112	88	71	11988.2	11944.2	11928.5	11936.6	11856.3	11932.1	11997.3	11760.4	11865	11821.2	11936.3	12206.3	12159.4	12531.2	12898.9	12662.7	10939.3	11010.6	10802.1	10829.6	10957	11069.6	11321.6	11047.5	10928.6	10819.9	10759.1	10812.6	10868.7	10985.8	10938.6	10348.1	14515.6	14188.6	14160.1	14074.6
sp|P50991|TCPD_HUMAN	sp	P50991	HUMAN	CCT4	T-complex protein 1 subunit delta	112	102	1	0	90	97	76	96	11914.5	11343.6	11326.1	11521.3	11629.1	11862	11532	11478.1	11517.5	11797.6	12040.4	11887	11902.4	12189.8	12884.9	12705.5	9937.19	9484.47	9541.21	9679.22	9759.44	9788.61	9701.27	9663.67	9677.11	9734.92	9656.94	9924.79	9841.84	9974.86	9728.12	9587.96	14640.5	14910.4	15437.6	14552.2
sp|P48643|TCPE_HUMAN	sp	P48643	HUMAN	CCT5	T-complex protein 1 subunit epsilon	138	114	1	0	75	105	92	110	18667.3	17969.7	17900.8	17809.7	18275.7	18232.7	18059.9	17565.1	17687.8	17688.8	17894.4	18730.7	18693.9	18514	19444.3	18731.7	13315.6	13420.4	13034.5	13097.7	13217	13235.4	13383.1	13286.2	13061.8	12811.7	12621.7	13401.1	13297.3	13206.1	13070.1	12231.2	19173.2	18110.6	19108.8	18281.9
sp|P40227|TCPZ_HUMAN	sp	P40227	HUMAN	CCT6A	T-complex protein 1 subunit zeta	90	77	1	0	50	58	38	57	12514.7	12324.1	12321.4	12518.5	12609.1	12876	12352.6	12109	12380.2	12419.4	12565.4	12567.7	12685.7	12905.6	13251	13555.9	10138.7	9692.04	9733.33	9902.49	9891.86	9784.61	9842.53	10105.6	9845.75	9870.47	9737.07	9963.03	9883.23	10006.7	10028.9	9483.7	8013.28	8181.2	8417.24	7768.25
sp|Q99832|TCPH_HUMAN	sp	Q99832	HUMAN	CCT7	T-complex protein 1 subunit eta	116	88	1	0	63	84	64	70	12707.9	12506.5	12301.8	12223.7	12508.6	12744.2	12383.3	12243	12396.2	12361.4	12466.6	12891.4	12716.2	12952.1	13714.6	13264.7	8578.3	8293.12	8310.93	8403.57	8503.97	8757.91	8521.74	8544.07	8371.61	8442.23	8273.48	8621.86	8650.42	8567.46	8728.62	8098.7	9945.83	9757.93	9610.33	9515.33
sp|P50990|TCPQ_HUMAN	sp	P50990	HUMAN	CCT8	T-complex protein 1 subunit theta	147	131	1	0	70	81	71	88	21504.2	21146.7	21082.6	21118.3	21279.8	21539.3	21072	20746.3	21406.5	20909.5	21524.8	21425.1	21695.4	21554.9	22351.5	21865.7	16039.2	16461	15705.7	15866.2	15945.4	16154.9	15888.4	15908.9	15826.3	15725.2	15615.6	15645.7	15782.1	15772.3	15663	15065.8	16365.8	14891.4	15151.2	14904.1
sp|P86790|CCZ1B_HUMAN	sp	P86790	HUMAN	CCZ1B	Vacuolar fusion protein CCZ1 homolog B	3	4	1	0	12	8	10	8	110.969	104.969	84.994	93.9975	87.8043	83.7908	104.555	82.1759	87.0628	95.2709	93.7483	109.579	89.7093	84.5155	85.2662	86.0872	558.949	478.837	501.266	461.274	462.516	420.01	455.615	468.371	485.456	469.02	463.85	495.522	531.298	498.737	524.742	504.989	2383.44	2355.23	2339.78	2337.06
sp|Q6YHK3|CD109_HUMAN	sp	Q6YHK3	HUMAN	CD109	CD109 antigen	30	45	1	0	23	25	25	20	3309.02	2919.17	2815.29	2700.08	2352.45	2613.12	2916.68	2802.39	2631.26	2494.25	2542.91	3147.7	3134.37	3109.41	3069.64	2974.42	5624.16	4353.23	4444.08	4266.52	4042.66	4204.43	4564.73	4462.75	4208.38	3991.53	4284.62	5091.26	5146.9	5468.38	5502.04	5990.03	3249.86	3379.5	3133.21	3427.95
sp|P48509|CD151_HUMAN	sp	P48509	HUMAN	CD151	CD151 antigen	7	5	1	0	7	8	7	9	1382.95	1392.32	1311.42	1305.19	1230.65	1420.32	1272.43	1451.01	1303.71	1230.38	1360.82	1073.71	1297.75	1280.39	1142.85	1236.26	364.632	643.993	439.947	398.887	368.038	353.571	430.72	387.304	382.012	394.265	378.628	443.379	432.723	434.13	364.123	430.812	1346.13	1419.9	1351.8	1415.27
sp|Q9HCU0|CD248_HUMAN	sp	Q9HCU0	HUMAN	CD248	Endosialin	11	5	1	0	12	21	8	14	1050.25	1093.84	919.098	799.24	652.701	703.712	1020.34	1022.56	696.53	612.499	645.111	935.98	1017.02	988.194	768.245	760.796	573.331	735.097	452.509	378.533	294.815	262.636	522.598	437.491	342.395	290.458	216.864	639.344	662.173	658.657	511.587	516.099	1552.94	1609.82	1744.76	1515.38
sp|Q9NZQ7|PD1L1_HUMAN	sp	Q9NZQ7	HUMAN	CD274	Programmed cell death 1 ligand 1	2	0	0	1	0	1	1	2	181.636	203.4	229.94	224.199	209.508	219.926	185.635	256.811	275.037	314.853	331.853	159.693	192.984	332.491	482.998	651.55	0	0	0	0	0	0	0	0	0	0	0	0	0	0	0	0	0	0	0	0
sp|Q5ZPR3|CD276_HUMAN	sp	Q5ZPR3	HUMAN	CD276	CD276 antigen	3	6	1	0	8	8	2	8	192.182	176.511	215.834	208.181	177.37	239.263	165.375	203.22	200.42	177.782	190.695	143.314	185.075	184.186	205.041	232.882	400.74	657.018	544.168	500.553	479.914	428.25	460.181	474.507	440.3	443.526	477.203	491.079	474.872	507.847	452.581	559.235	891.125	665.069	668.679	813.337
sp|Q9Y5K6|CD2AP_HUMAN	sp	Q9Y5K6	HUMAN	CD2AP	CD2-associated protein	21	11	1	0	24	23	20	24	2186.64	2246.35	2220.3	2177.63	2214.5	2116.99	2287.17	2252.01	2339	2457.49	2560.71	2252.8	2260.31	2298.89	2399.72	2487.79	559.484	589.424	613.903	601.991	553.43	570.982	599.81	602	651.868	594.51	634.295	625.757	601.383	594.959	596.518	667.596	4669.78	5082.57	4649.05	4839.47
sp|O95400|CD2B2_HUMAN	sp	O95400	HUMAN	CD2BP2	CD2 antigen cytoplasmic tail-binding protein 2	9	7	1	0	10	11	12	11	401.615	449.376	402.961	430.115	420.146	387.898	437.402	427.582	370.164	366.566	350.606	442.831	447.892	420.971	377.496	354.329	482.277	496.905	467.595	495.373	495.212	454.407	525.456	500.188	475.294	438.335	362.709	510.916	530.781	480.737	434.404	418.999	1217.59	1262.62	1125.46	1151.1
sp|Q9NPF0|CD320_HUMAN	sp	Q9NPF0	HUMAN	CD320	CD320 antigen	1	2	1	0	3	0	1	2	42.091	40.8397	32.3481	31.8304	31.2747	29.1743	37.814	35.6732	29.2532	28.829	29.3917	41.6336	31.0064	27.5457	38.2486	33.8443	202.876	415.167	265.421	214.089	165.676	118.523	368.54	303.773	198.212	146.925	134.292	365.969	325.974	243.946	199.288	167.944	340.543	375.596	309.744	299.006
sp|O15446-2|RPA34_HUMAN	sp	O15446-2	HUMAN	CD3EAP	Isoform 2 of DNA-directed RNA polymerase I subunit RPA34	9	6	1	0	18	14	11	9	742.042	762.084	743.872	748.506	752.312	676.626	763.45	742.765	761.328	727.293	661.667	756.293	763.784	776.835	761.868	708.437	376.251	410.868	377.058	396.834	396.261	399.72	409.125	382.092	383.589	380.343	355.055	362.094	372.26	384.219	352.977	312.143	1983.15	2031.58	2107.86	2085.98
sp|P25942|TNR5_HUMAN	sp	P25942	HUMAN	CD40	Tumor necrosis factor receptor superfamily member 5	2	0	0	1	2	3	3	2	42.9205	45.8085	47.5836	43.7172	36.8722	44.2638	43.2726	56.1546	41.7946	42.4755	61.0295	31.1517	39.8894	47.9919	46.4725	46.0931	0	0	0	0	0	0	0	0	0	0	0	0	0	0	0	0	274.364	249.818	252.18	286.401
sp|P16070|CD44_HUMAN	sp	P16070	HUMAN	CD44	CD44 antigen	25	27	1	0	69	44	43	32	4449.49	4263.2	4678.38	4853.34	4359.7	5024.11	3996.02	4912.54	4757.81	4670.13	5115.06	3415.68	4147.43	4665.42	4555.05	4610.32	2870.04	5130.35	3789.21	3587.45	3324.39	2865.53	3596.98	3461.03	3502.22	3460.78	3398.06	3409.79	3418.27	3575.87	3027.7	3297.06	14420.7	11923.3	13000.6	13414.2
sp|P15529-2|MCP_HUMAN	sp	P15529-2	HUMAN	CD46	Isoform B of Membrane cofactor protein	1	2	1	0	11	8	7	6	197.754	158.732	173.17	174.68	156.594	198.208	154.613	187.486	171.151	168.904	201.302	119.589	151.631	169.065	147.917	161.854	29.1284	46.4174	47.1679	43.0446	28.9432	27.1737	44.9564	36.466	36.736	41.0038	29.0179	44.7278	36.9885	34.1195	32.9161	35.2559	1916.02	2044.23	1985.54	2159.29
sp|Q08722|CD47_HUMAN	sp	Q08722	HUMAN	CD47	Leukocyte surface antigen CD47	13	10	1	0	5	2	2	3	2364.41	2203.87	2377.78	2462.48	2122.05	2675.37	2125.86	2419.21	2385.69	2329.02	2613.46	1747.48	2080.32	2443.12	2310.86	2714.82	1226.01	1926.01	1503.86	1430.84	1314.46	1251.18	1373.88	1363.48	1372.42	1411	1429.26	1362.24	1358.68	1427.56	1363.4	1770.09	860.618	1006.56	967.813	1052.4
sp|P08174-7|DAF_HUMAN	sp	P08174-7	HUMAN	CD55	Isoform 7 of Complement decay-accelerating factor	3	2	1	0	13	10	7	10	351.453	366.326	383.25	387.468	361.547	389.414	356.754	382.323	383.758	405.852	555.387	321.477	333.562	389.936	457.065	798.775	345.445	547.069	437.315	401.4	336.844	332.589	424.922	402.38	415.426	405.358	480.338	405.181	433.824	389.953	369.028	817.502	1350.18	1273.12	1300.47	1394.92
sp|P13987|CD59_HUMAN	sp	P13987	HUMAN	CD59	CD59 glycoprotein	20	15	1	0	14	8	7	11	1514.07	1584.01	1623.63	1688.21	1505.43	1644.24	1502.96	1704.66	1617	1510.25	1598.13	1388.39	1450.98	1701.94	1512.65	1567.68	811.313	1262.69	1021.46	997.317	870.545	777.616	936.445	966.511	922.159	900.16	920.864	949.724	980.573	952.043	847.275	1062.95	1836.33	1730.45	1693.99	1839.43
sp|P08962|CD63_HUMAN	sp	P08962	HUMAN	CD63	CD63 antigen	12	15	1	0	12	13	15	12	1067.69	1068.58	1051.35	1015.85	1006.31	1006.85	1023.38	1068.63	971.752	928.704	943.123	1011.99	1065.03	1035.67	1053.03	976.876	812.281	879.792	794.861	847.175	801.885	848.303	848.629	837.995	824.866	796.335	888.71	899.003	902.376	896.885	814.379	927.311	3356.1	3799.16	2931.25	3329.22
sp|P60033|CD81_HUMAN	sp	P60033	HUMAN	CD81	CD81 antigen	14	15	1	0	8	10	8	11	1194.27	1023.64	1131.29	1107.32	910.201	1206.03	980.183	1103.45	1048.68	1047.4	1103.79	851.07	1019.5	1061.16	1129.79	1199.53	1482.09	1882.7	1568.17	1438.64	1198.36	1212.82	1379.5	1371.88	1302.6	1333.4	1486.81	1471.27	1559.55	1598.3	1575.27	1737.42	1019.99	1141.45	1217.86	1107.4
sp|P27701|CD82_HUMAN	sp	P27701	HUMAN	CD82	CD82 antigen	1	0	0	1	2	2	2	2	191.203	91.8071	103.369	118.535	162.858	181.341	92.7095	110.233	154.553	180.106	177.848	70.5147	124.724	166.941	179.007	175.642	0	0	0	0	0	0	0	0	0	0	0	0	0	0	0	0	741.767	510.264	510.75	513.995
sp|P21926|CD9_HUMAN	sp	P21926	HUMAN	CD9	CD9 antigen	14	15	1	0	8	7	6	10	2202.59	1938.16	2241.5	2376.81	1943.98	2489.72	1859.76	2373.8	2258.36	2173.17	2609.99	1584.7	1979.97	2359.57	2100.63	2401.01	1834.1	2742.46	2225.42	2158.06	1838.2	1930.86	1888.89	1983.79	2055.44	2026.03	2368.01	1860.39	2000.94	2136.75	1882.64	2461.53	1966.38	1917.91	1887.8	2056.14
sp|P48960|CD97_HUMAN	sp	P48960	HUMAN	CD97	CD97 antigen	25	21	1	0	20	19	14	13	2880.35	2756.67	2706.04	2717.94	2819.43	2942.84	2692.17	2786.62	2683.55	2685.08	3002.64	2781.26	2783.21	2759.49	2850.37	2776.58	1367.75	1280.22	1271.8	1287.55	1298.47	1423.76	1365.04	1276.25	1281.78	1346.35	1418.63	1400.24	1410.06	1387.69	1388.91	1312.23	2135.12	2159.09	2362.46	2152.95
sp|P14209|CD99_HUMAN	sp	P14209	HUMAN	CD99	CD99 antigen	9	11	1	0	25	8	7	21	925.499	905.765	852.505	821.597	715.013	863.129	880.847	915.414	847.529	796.593	856.481	840.493	857.608	853.791	884.965	895.518	1385.7	1481.82	1177.09	1217.74	1131.66	1444.83	1282.59	1216.56	1240.02	1140.86	1401.55	1366.24	1375.98	1388.51	1375.98	1523.5	2550.8	2380.68	3280.4	2786.45
sp|Q8TCZ2|C99L2_HUMAN	sp	Q8TCZ2	HUMAN	CD99L2	CD99 antigen-like protein 2	5	3	1	0	2	2	1	4	244.365	184.559	211.044	190.835	160.082	195.377	175.597	205.224	190.508	187.154	211.005	203.574	207.176	222.197	191.007	267.266	141.435	133.675	122.285	124.117	121.003	95.7425	130.309	126.864	129.885	105.217	126.222	124.596	132.391	125.543	135.553	143.774	667.63	552.432	584.836	519.034
sp|Q8IWY9|CDAN1_HUMAN	sp	Q8IWY9	HUMAN	CDAN1	Codanin-1	1	0	0	1	0	3	3	1	95.6431	86.273	90.5037	83.8297	87.5124	78.6233	70.5342	82.1774	81.8835	86.1182	78.2802	87.6012	87.1992	83.3525	79.4558	75.8561	0	0	0	0	0	0	0	0	0	0	0	0	0	0	0	0	0	0	0	0
sp|O75794|CD123_HUMAN	sp	O75794	HUMAN	CDC123	Cell division cycle protein 123 homolog	6	12	1	0	6	6	7	5	1114.87	1191.87	1090.99	1031.72	952.551	881.744	1200.78	1147.67	1122.01	1209.79	1267.58	1186.38	987.161	600.996	370.473	403.732	1273.49	1152	1251.78	1224.09	1135.23	1071.01	1389.09	1308.72	1296.88	1265.65	1354.95	1310.17	1296.23	1270	1055.63	773.406	1277.76	1181.33	978.591	1126.39
sp|Q13042|CDC16_HUMAN	sp	Q13042	HUMAN	CDC16	Cell division cycle protein 16 homolog	17	13	1	0	13	12	9	7	2196.63	2145.92	2172.18	2110.76	2059.94	2185.46	2097.76	2003.97	1984.39	2054.76	2051.29	2178.42	2159.92	2100.64	2114.98	1934.38	937.822	892.34	940.533	886.886	905.227	820.734	846.06	884.359	897.385	898.961	939.672	985.325	914.421	930.945	921.275	843.474	2344.56	2291.42	2388.4	2211.66
sp|Q12834|CDC20_HUMAN	sp	Q12834	HUMAN	CDC20	Cell division cycle protein 20 homolog	2	1	1	0	6	4	5	5	182.459	136.423	95.6424	74.0739	57.8945	36.8124	134.922	72.0075	65.9047	51.1926	46.8251	237.066	157.081	98.7579	82.9776	78.3335	90.5757	46.561	25.0932	26.1748	22.7239	14.2019	47.5071	27.4846	19.6514	17.8849	10.6744	123.819	124.536	83.8622	107.414	142.256	689.11	786.461	570.223	763.78
sp|Q9UJX2|CDC23_HUMAN	sp	Q9UJX2	HUMAN	CDC23	Cell division cycle protein 23 homolog	11	16	1	0	9	12	6	15	640.732	665.62	689.689	699.333	655.466	647.191	685.064	691.032	675.193	667.775	588.031	716.762	705.418	752.879	695.566	664.3	1295.16	1248.24	1320.02	1217.9	1200.2	915.421	1279.1	1277.03	1246.04	1271.41	1252.13	1337.9	1288.44	1324.25	1241.11	1265.89	1822.28	1668.97	1734.01	1545.5
sp|P30307|MPIP3_HUMAN	sp	P30307	HUMAN	CDC25C	M-phase inducer phosphatase 3	3	0	0	1	3	5	3	2	445.787	496.408	378.533	301.588	262.03	201.948	483.841	367.276	318.473	260.068	198.621	505.988	435.076	323.841	263.848	198.495	0	0	0	0	0	0	0	0	0	0	0	0	0	0	0	0	323.428	381.89	410.774	332.648
sp|Q8NHZ8|CDC26_HUMAN	sp	Q8NHZ8	HUMAN	CDC26	Anaphase-promoting complex subunit CDC26	3	3	1	0	6	4	2	4	651.136	739.663	694.628	666.88	756.594	772.372	734.675	660.265	651.696	620.549	670.626	678.907	688.29	595.846	603.673	577.716	442.529	395.054	340.343	341.123	337.135	366.173	369.008	374.049	344.934	329.502	368.813	362.979	409.106	390.982	425.262	328.738	1225.99	1156.27	1137.95	997.174
sp|P30260-2|CDC27_HUMAN	sp	P30260-2	HUMAN	CDC27	Isoform 2 of Cell division cycle protein 27 homolog	16	17	1	0	13	18	12	20	1690.96	1863.66	1749.49	1698.71	1634.57	1624.84	1810.63	1695.99	1722.33	1707.88	1636.74	1821.21	1703.48	1588.47	1587.42	1557.91	1559.37	1621.32	1620.66	1563.26	1551.82	1421.7	1640.15	1604.06	1570.35	1592.11	1621.84	1690.46	1600.23	1575.22	1626.67	1596.02	1961.32	2066.71	1971.54	2087.99
sp|P49427|UB2R1_HUMAN	sp	P49427	HUMAN	CDC34	Ubiquitin-conjugating enzyme E2 R1	1	3	1	0	3	3	3	4	110.556	118.079	108.072	106.623	117.164	90.1857	121.613	116.511	99.3733	102.436	90.8229	117.865	107.72	96.6448	76.8452	92.7866	256.886	293.186	247.618	235.55	260.346	204.778	265.25	263.702	246.549	244.305	225.549	272.147	294.064	265.299	260.019	215.065	507.001	592.152	484.678	512.142
sp|Q16543|CDC37_HUMAN	sp	Q16543	HUMAN	CDC37	Hsp90 co-chaperone Cdc37	53	44	1	0	26	34	33	46	6487.9	5767.48	5901.09	5931.58	5836.22	5526.22	5864.7	6027.89	6082.52	5843.16	5446.05	6105.15	6330	6282.18	6375.29	5963.12	5365.84	5206.56	5006.76	5035.35	5114.83	4609.55	4888.75	4969.17	4907.18	4726.34	4350.66	5077.08	5184.79	5216.88	5192.4	4920.03	5485.15	5518.75	5379.09	5347.73
sp|O60508|PRP17_HUMAN	sp	O60508	HUMAN	CDC40	Pre-mRNA-processing factor 17	5	2	1	0	12	11	11	13	416.298	389.308	393.978	381.79	355.732	317.57	407.445	371.171	403.009	406.486	407.452	423.123	396.962	367.567	330.969	338.507	118.321	107.074	121.927	118.848	96.3866	95.7527	136.926	118.137	114.084	115.775	108.921	120.731	127.168	108.619	103.991	89.3715	2659.08	2588.89	2431.48	2561.8
sp|P60953|CDC42_HUMAN	sp	P60953	HUMAN	CDC42	Cell division control protein 42 homolog	21	22	1	0	14	17	18	20	2472.67	2167.96	2454.49	2359.72	2141.31	2195.11	2105.46	2301.38	2334.48	2185.24	2260.65	2236.28	2231.6	2312.82	2411.99	2280.43	2931.76	3163.47	3231.37	3153.12	2957.86	2895.25	3090.33	3054.89	3036.69	2952.66	2954.21	3071.13	3052.21	2969.13	2983.35	2843.24	2972.84	2761.61	2912.92	3170.93
sp|Q5VT25-2|MRCKA_HUMAN	sp	Q5VT25-2	HUMAN	CDC42BPA	Isoform 2 of Serine/threonine-protein kinase MRCK alpha	12	8	1	0	44	31	31	46	1932.19	2033.69	1909.12	1834.72	1849.89	1844.85	1960.9	1912.48	1791.91	1819.62	1787.8	1969.38	1890.34	2013.41	1940.46	1908.38	413.884	422.633	376.232	373.279	385.687	426.017	406.582	397.627	406.574	399.038	417.479	389.048	410.511	413.44	401.318	402.965	6462.18	6349.54	6224.43	5832.19
sp|Q9Y5S2|MRCKB_HUMAN	sp	Q9Y5S2	HUMAN	CDC42BPB	Serine/threonine-protein kinase MRCK beta	25	24	1	0	29	33	35	29	2164.06	2176.3	2095.16	2084.73	2003.83	2160.45	2106.61	2085.36	2037.54	2042.95	2006.77	2228.18	2187.64	2260.6	2201.74	2214.35	1686.07	1505.79	1537.46	1473.11	1448.14	1588.22	1506.95	1499.12	1510.4	1526.86	1686.55	1587.41	1610.93	1612.42	1715.64	1691.26	5609.29	5302.68	5271.47	5048.53
sp|Q00587|BORG5_HUMAN	sp	Q00587	HUMAN	CDC42EP1	Cdc42 effector protein 1	8	5	1	0	9	10	7	11	504.957	481.172	426.981	441.252	394.997	408.473	458.671	442.872	461.236	449.13	382.365	520.965	485.988	477.426	510.508	421.452	277.571	229.861	219.623	229.595	234.225	241.939	251.861	238.217	258.251	239.987	225.162	275.949	279.406	258.921	234.698	222.986	819.806	955.923	888.56	815.294
sp|O14613|BORG1_HUMAN	sp	O14613	HUMAN	CDC42EP2	Cdc42 effector protein 2	2	3	1	0	2	4	4	7	104.106	97.0732	95.7106	82.6656	77.6147	103.036	85.5016	84.7007	93.842	82.7447	107.614	111.733	89.8954	94.6915	105.04	144.343	215.322	184.923	167.251	162.864	170.44	211.221	178.013	169.52	179.685	157.994	193.507	197.832	203.111	225.057	226.966	275.102	258.975	232.572	267.879	182.154
sp|Q9UKI2|BORG2_HUMAN	sp	Q9UKI2	HUMAN	CDC42EP3	Cdc42 effector protein 3	7	6	1	0	3	9	7	9	792.731	723.073	574.046	412.212	329.991	248.515	679.217	577.521	458.496	343.44	258.584	805.006	707.697	440.219	398.031	398.186	565.907	377.503	321.29	272.985	204.856	199.343	386.15	348.687	265.532	228.965	172.113	502.657	511.541	531.465	517.743	296.146	963.684	771.181	833.529	898.878
sp|Q9H3Q1|BORG4_HUMAN	sp	Q9H3Q1	HUMAN	CDC42EP4	Cdc42 effector protein 4	9	3	1	0	9	12	10	10	351.711	395.277	336.044	331.744	314.841	320.249	367.952	332.3	341.42	325.123	333.298	363.852	363.417	330.11	336.869	366.385	166.174	182.141	157.994	147.434	164.815	173.822	176.962	158.632	162.85	159.834	139.107	163.831	169.015	176.779	184.313	178.159	1168.95	1171.56	1239.61	1165.66
sp|Q6NZY7|BORG3_HUMAN	sp	Q6NZY7	HUMAN	CDC42EP5	Cdc42 effector protein 5	0	1	0	1	1	3	2	5	0	0	0	0	0	0	0	0	0	0	0	0	0	0	0	0	177.965	135.553	141.377	115.629	114.634	91.9254	139.94	120.559	122.372	109.279	71.3163	153.516	154.683	168.477	171.937	144.966	192.438	259.922	206.873	211.766
sp|O75419-3|CDC45_HUMAN	sp	O75419-3	HUMAN	CDC45	Isoform 3 of Cell division control protein 45 homolog	2	0	0	1	0	1	1	0	35.2472	41.6948	42.5282	38.9597	35.9978	26.7856	45.4255	37.8469	42.3797	36.5533	35.5732	52.336	46.9541	34.8469	33.8136	29.3161	0	0	0	0	0	0	0	0	0	0	0	0	0	0	0	0	0	0	0	0
sp|Q99459|CDC5L_HUMAN	sp	Q99459	HUMAN	CDC5L	Cell division cycle 5-like protein	35	25	1	0	30	45	32	39	3784.36	3827.32	3890.6	3765.91	3869.04	3789.33	3738.98	3949.34	3939.54	4029.86	4155.24	3850.94	3857.68	3726.14	3771.73	3659.61	1775.02	1800.5	1747.46	1776.81	1800.96	1780.35	1741.42	1782.05	1785.27	1790.2	1865.01	1766.81	1801.23	1763.18	1838.83	1712.48	4969.34	5299.05	5167.13	4889.61
sp|Q99741|CDC6_HUMAN	sp	Q99741	HUMAN	CDC6	Cell division control protein 6 homolog	1	0	0	1	1	1	0	0	56.2088	85.8482	23.9677	7.81643	0	1.8878	74.1246	96.0691	242.873	462.652	556.28	73.6226	36.9869	21.7202	21.541	32.7812	0	0	0	0	0	0	0	0	0	0	0	0	0	0	0	0	82.5757	52.4711	74.306	76.6941
sp|O00311|CDC7_HUMAN	sp	O00311	HUMAN	CDC7	Cell division cycle 7-related protein kinase	1	0	0	1	0	0	1	0	84.0041	100.46	88.6725	70.1159	63.4889	38.9952	87.6214	84.6565	74.5166	67.3614	62.5774	111.79	89.4743	66.0388	63.5626	53.0116	0	0	0	0	0	0	0	0	0	0	0	0	0	0	0	0	0	0	0	0
sp|Q6P1J9|CDC73_HUMAN	sp	Q6P1J9	HUMAN	CDC73	Parafibromin	10	14	1	0	15	20	17	17	2110.11	2069.84	2013.11	1865.2	1811.99	1756.81	2134.54	1903.13	1947.13	1922.72	1968.57	2151.23	1976.58	1684.48	1747.49	1648.37	1157.63	1015.16	1060.91	1102.74	1048.79	1043.64	1143.74	1078.9	1050.46	1124.02	1133.73	1164.28	1172.16	1191.55	1219.76	1193.32	2998.9	2846.47	2721.92	2877.83
sp|Q69YH5|CDCA2_HUMAN	sp	Q69YH5	HUMAN	CDCA2	Cell division cycle-associated protein 2	1	0	0	1	5	7	6	2	220.596	239.979	222.788	207.789	203.112	173.699	249.748	208.42	201.217	166.929	148.95	252.025	219.814	166.403	140.954	118.984	0	0	0	0	0	0	0	0	0	0	0	0	0	0	0	0	636.485	799.034	692.649	807.649
sp|Q99618|CDCA3_HUMAN	sp	Q99618	HUMAN	CDCA3	Cell division cycle-associated protein 3	2	0	0	1	5	5	4	3	74.8397	90.4688	74.695	75.1741	59.2412	51.7124	84.0573	85.0988	73.5562	58.3093	51.9575	85.7799	81.1241	70.7253	59.371	50.6531	0	0	0	0	0	0	0	0	0	0	0	0	0	0	0	0	805.96	927.348	693.593	867.1
sp|Q96FF9|CDCA5_HUMAN	sp	Q96FF9	HUMAN	CDCA5	Sororin	3	1	1	0	3	5	6	3	220.786	298.699	301.393	263.239	265.539	205.414	288.353	267.416	258.711	271.633	212.679	315.027	271.703	262.37	256.381	221.681	88.0782	94.8649	86.7569	93.1755	86.7061	60.2102	91.7148	82.3988	82.0785	75.5646	48.8003	88.7859	99.8528	76.4611	74.3709	147.204	273.502	325.684	226.348	301.459
sp|Q9BWT1-2|CDCA7_HUMAN	sp	Q9BWT1-2	HUMAN	CDCA7	Isoform 2 of Cell division cycle-associated protein 7	0	1	0	1	0	2	0	0	0	0	0	0	0	0	0	0	0	0	0	0	0	0	0	0	25.6943	36.4392	23.0023	23.6206	28.6013	27.2894	21.7178	26.1633	19.6721	28.0869	24.4134	27.4608	31.0688	29.7603	25.0841	19.4961	0	0	0	0
sp|Q53HL2|BOREA_HUMAN	sp	Q53HL2	HUMAN	CDCA8	Borealin	6	2	1	0	5	9	8	8	1025.84	983.404	925.603	813.491	797.52	636.82	979.074	856.367	791.761	755.451	596.642	1117.26	914.102	662.523	613.901	549.112	87.3615	86.5969	74.0686	87.4364	76.4274	63.6665	102.403	84.0839	76.9154	74.1227	50.7253	108.452	107.085	87.0463	71.6364	90.5786	839.789	1121.39	793.533	827.365
sp|P55287|CAD11_HUMAN	sp	P55287	HUMAN	CDH11	Cadherin-11	11	8	1	0	30	20	19	10	691.291	790.879	766.993	709.803	598.687	651.355	772.74	798.895	707.24	653.722	712.504	610.668	661.693	658.991	570.426	629.452	204.613	308.359	232.416	204.129	168.318	151.865	206.906	212.699	199.235	179.941	164.429	226.651	202.025	230.104	208.125	215.505	5062.29	4853.31	5134.92	4737.93
sp|P55290-4|CAD13_HUMAN	sp	P55290-4	HUMAN	CDH13	Isoform 4 of Cadherin-13	7	7	1	0	20	18	16	14	364.359	376.654	366.708	345.211	306.427	366.919	402.758	406.518	362.15	327.41	391.238	355.089	358.053	381.864	374.838	373.984	362.489	363.923	336.636	302.788	286.406	292.458	328.287	313.41	286.497	280.015	321.676	364.899	375.997	359.583	361.312	385.038	2256.8	2187.61	2470.09	2207.75
sp|P19022|CADH2_HUMAN	sp	P19022	HUMAN	CDH2	Cadherin-2	18	14	1	0	18	22	25	17	2130.72	2136.7	2144.74	2096.22	1872.82	1809.53	2025.56	2212.46	2093.49	1887.17	1960.84	1687.57	1873.63	2141.25	1909.71	1957.11	841.097	1240.57	1034.7	927.704	815.269	670.254	945.679	927.374	915.463	854.181	780.368	913.96	942.743	986.156	832.086	954.012	2608.94	2480.4	2350.29	2356.41
sp|P55285|CADH6_HUMAN	sp	P55285	HUMAN	CDH6	Cadherin-6	4	6	1	0	7	5	5	4	164.528	134.633	142.798	127.744	99.2829	117.658	131.189	162.143	141.652	118.793	126.38	125.046	142.799	151.746	105.616	121.735	199.574	257.988	214.15	194.667	151.714	138.914	203.558	196.664	187.028	159.198	160.591	203.539	206.93	216.36	205.419	214.664	941.728	869.363	859.606	856.554
sp|P06493|CDK1_HUMAN	sp	P06493	HUMAN	CDK1	Cyclin-dependent kinase 1	28	22	1	0	9	11	16	11	3554.1	4039.13	3747.13	3351.46	3308.27	2315.25	3886.64	3490.31	3234.55	2946.96	2274.74	4038.2	3741.45	3394.96	3226.4	2335.17	1802.38	2303.46	2045.58	1958.51	1766.85	1108.85	2241.59	2130.25	1940.72	1590.44	1136.42	2210.35	2187.3	1876	1742.13	1613.65	1775.31	1970.29	2070.2	1829.5
sp|Q9UQ88|CD11A_HUMAN	sp	Q9UQ88	HUMAN	CDK11A	Cyclin-dependent kinase 11A	1	1	1	0	0	2	1	0	98.1177	91.161	93.2879	77.2676	75.7306	79.3184	83.6256	73.3702	76.7978	68.0819	76.6518	105.973	89.6414	84.6676	88.7006	83.6117	105.257	107.822	99.3831	106.484	88.7595	81.3064	107.382	74.6404	78.9191	90.0848	88.7503	121.203	116.148	102.983	114.023	97.1372	0	0	0	0
sp|P21127|CD11B_HUMAN	sp	P21127	HUMAN	CDK11B	Cyclin-dependent kinase 11B	11	8	1	0	15	24	19	15	1448.77	1475.4	1381.81	1390.28	1316.88	1254.49	1532.62	1372.02	1319.35	1318.37	1309.34	1516.76	1451.61	1451.79	1383.21	1351.54	641.302	628.403	611.025	645.524	602.019	599.189	622.291	634.982	619.437	614.05	587.223	651.961	644.96	631.577	651.363	595.538	2369.8	2658.34	2447.1	2425.14
sp|Q9NYV4|CDK12_HUMAN	sp	Q9NYV4	HUMAN	CDK12	Cyclin-dependent kinase 12	3	4	1	0	8	16	13	13	308.308	317.988	312.014	319.676	275.118	263.894	321.191	305.883	311.665	302.662	291.891	318.442	319.953	311.621	304.261	298.739	503.822	509.351	515.386	494.175	502.769	491.38	499.45	487.238	493.308	558.129	546.508	525.205	538.258	494.685	525.339	490.733	1326.79	1196.85	1146.88	1122.53
sp|Q14004|CDK13_HUMAN	sp	Q14004	HUMAN	CDK13	Cyclin-dependent kinase 13	13	8	1	0	11	15	15	18	746.202	769.959	739.608	710.076	668.34	655.509	755.942	718.039	729.962	725.349	695.489	782.696	764.947	746	722.506	700.273	480.317	452.67	466.548	452.05	431.561	460.517	480.295	483.093	474.339	500.365	522.093	477.49	502.367	480.486	486.77	464.059	2220.7	2297.07	2220.61	2218.22
sp|O94921|CDK14_HUMAN	sp	O94921	HUMAN	CDK14	Cyclin-dependent kinase 14	0	1	0	1	1	1	0	1	0	0	0	0	0	0	0	0	0	0	0	0	0	0	0	0	30.7081	33.064	29.7981	28.1314	30.0721	25.5511	32.7757	31.4139	30.2725	30.7627	28.9203	31.5565	35.4425	27.1241	29.4549	27.4547	65.0758	76.1436	67.2217	77.2226
sp|Q00536-2|CDK16_HUMAN	sp	Q00536-2	HUMAN	CDK16	Isoform 2 of Cyclin-dependent kinase 16	4	3	1	0	7	9	6	6	283.397	298.985	288.763	273.376	273.837	274.372	293.635	271.395	271.113	282.805	276.644	313.149	287.134	320.583	275.637	312.334	385.531	385.14	375.591	374.797	385.621	352.486	407.124	394.207	377.738	408.243	356.028	403.842	379.394	385.134	383.708	399.995	624.002	801.176	815.848	807.958
sp|Q00537|CDK17_HUMAN	sp	Q00537	HUMAN	CDK17	Cyclin-dependent kinase 17	2	4	1	0	6	4	4	7	124.406	142.949	134.767	132.976	136.597	119.13	163.26	153.918	165.875	176.362	199.077	153.949	160.554	142.108	158.206	176.545	163.796	188.461	178.466	162.342	166.419	152.039	199.696	206.377	186.785	219.433	247.602	181.263	190.093	191.392	207.867	301.262	588.465	641.809	674.367	651.671
sp|Q9BWU1|CDK19_HUMAN	sp	Q9BWU1	HUMAN	CDK19	Cyclin-dependent kinase 19	2	3	1	0	3	5	2	5	141.144	140.118	131.778	125.633	137.112	114.701	147.02	142.18	121.101	131.108	112.787	144.01	128.995	136.565	123.072	112.462	151.693	146.042	140.229	142.879	152.904	160.302	142.204	138.876	144.074	134.882	125.42	145.016	161.25	149.982	152.628	121.908	375.634	384.902	419.659	372.931
sp|P24941|CDK2_HUMAN	sp	P24941	HUMAN	CDK2	Cyclin-dependent kinase 2	18	13	1	0	14	7	10	8	1955.24	1936.73	2000.58	1854.35	1665.63	1405.38	1892.14	1917.81	1834.07	1671.42	1446.91	2105.85	2038.16	1849.75	1714.32	1566.46	1277.84	1464.14	1502.67	1480.47	1414.7	998.469	1798.84	1543.47	1405.56	1341.52	1079.16	1423	1432.19	1276.66	1295.98	1309.26	1621.43	1584.18	1594.64	1554.7
sp|O75956|CDKA2_HUMAN	sp	O75956	HUMAN	CDK2AP2	Cyclin-dependent kinase 2-associated protein 2	2	0	0	1	1	4	2	4	131.913	119.726	112.708	121.416	115.218	116.253	123.402	110.754	119.494	103.849	102.074	128.857	128.208	127.082	107.66	112.145	0	0	0	0	0	0	0	0	0	0	0	0	0	0	0	0	155.906	166.714	146.563	144.534
sp|P11802|CDK4_HUMAN	sp	P11802	HUMAN	CDK4	Cyclin-dependent kinase 4	0	3	0	1	1	5	3	4	0	0	0	0	0	0	0	0	0	0	0	0	0	0	0	0	189.639	154.718	128.53	100.849	79.0689	84.4377	171.076	129.563	98.6306	92.5058	89.7331	201.326	210.946	203.23	176.031	185.631	108.642	93.8264	102.386	96.0131
sp|Q00535|CDK5_HUMAN	sp	Q00535	HUMAN	CDK5	Cyclin-dependent-like kinase 5	10	9	1	0	14	10	7	7	1529.31	1343.39	1308.08	1332.8	1310.25	1439.98	1301.22	1325.21	1283.11	1306.62	1423.11	1413.52	1355.17	1507.7	1459.64	1562.92	437.592	397.178	409.603	415.814	386.516	399.587	436.821	403.149	371.581	396.56	399.428	419.827	404.872	406.154	412.868	393.696	2892.24	3282.9	3211.77	2919.36
sp|Q96SZ6|CK5P1_HUMAN	sp	Q96SZ6	HUMAN	CDK5RAP1	CDK5 regulatory subunit-associated protein 1	1	2	1	0	1	4	3	2	191.301	202.964	189.207	179.546	194.378	182.836	186.894	186.26	156.574	194.316	206.761	202.896	203.746	224.875	188.114	200.067	144.939	169.44	117.638	102.212	80.9724	61.4346	149.175	121.714	86.6451	78.5449	58.9588	160.432	151.532	147.884	114.26	103.886	104.468	114.326	119.077	106.083
sp|Q96SN8|CK5P2_HUMAN	sp	Q96SN8	HUMAN	CDK5RAP2	CDK5 regulatory subunit-associated protein 2	6	9	1	0	14	15	9	11	511.866	637.666	563.007	472.166	462.799	398.67	615.173	548.987	556.783	559.551	463.567	597.686	512.112	367.102	269.681	270.831	748.524	752.43	533.388	490.014	383.754	234.084	739.166	546.088	463.155	373.234	291.777	784.856	812.458	724.136	638.006	594.457	1500.24	1585.79	1559.41	1550.58
sp|Q96JB5-4|CK5P3_HUMAN	sp	Q96JB5-4	HUMAN	CDK5RAP3	Isoform 4 of CDK5 regulatory subunit-associated protein 3	23	27	1	0	15	18	17	11	2598.56	2638.25	2631.5	2556.15	2539.44	2510.04	2548.33	2529.91	2490.85	2462.77	2465.98	2677.34	2654.8	2646.28	2728.51	2539.39	2767.77	2552.67	2528.17	2555.86	2569.17	2713.76	2701.36	2550.71	2533.63	2591.9	2684.86	2668.48	2564.2	2594.55	2643.75	2536.94	2142.04	2085.71	1900.75	1917.24
sp|Q00534|CDK6_HUMAN	sp	Q00534	HUMAN	CDK6	Cyclin-dependent kinase 6	5	2	1	0	9	6	6	7	414.531	438.697	421.498	417.142	380.247	383.491	432.45	421.575	436.043	442.118	446.377	442.81	424.3	463.597	398.707	404.801	271.288	250.11	253.924	267.323	255.07	247.727	257.486	260.262	257.487	244.608	277.312	250.918	266.075	261.359	251.708	212.435	1009.64	958.155	961.047	1005.7
sp|P50613|CDK7_HUMAN	sp	P50613	HUMAN	CDK7	Cyclin-dependent kinase 7	3	2	1	0	5	7	6	4	262.034	266.414	267.029	265.847	274.88	245.407	246.882	259.378	271.826	272.047	285.031	253.685	236.122	239.463	266.218	214.645	55.9237	55.7736	60.8932	55.0281	53.2487	52.586	54.4755	53.7262	69.3169	57.2543	65.5566	62.7118	50.0592	55.4008	58.7704	58.3047	893.735	868.828	925.483	921.626
sp|P49336|CDK8_HUMAN	sp	P49336	HUMAN	CDK8	Cyclin-dependent kinase 8	1	0	0	1	2	2	1	0	117.232	142.932	130.922	117.22	137.04	105.455	128.513	130.139	111.43	113.774	99.4659	130.535	128.517	122.939	111.533	118.166	0	0	0	0	0	0	0	0	0	0	0	0	0	0	0	0	430.827	471.344	490.053	443.145
sp|P50750-2|CDK9_HUMAN	sp	P50750-2	HUMAN	CDK9	Isoform 2 of Cyclin-dependent kinase 9	2	3	1	0	9	6	4	7	109.714	96.1085	87.9318	80.4189	87.9291	81.5754	102.026	86.6532	99.191	114.949	129.343	105.786	98.8522	97.7146	97.3977	95.1624	114.241	116.909	103.958	98.3972	83.7777	84.0291	112.588	95.1815	109.575	125.215	131.013	116.387	120.397	121.352	120.076	116.817	754.713	760.683	746.894	740.669
sp|Q5VV42|CDKAL_HUMAN	sp	Q5VV42	HUMAN	CDKAL1	Threonylcarbamoyladenosine tRNA methylthiotransferase	5	3	1	0	8	6	4	11	557.77	493.6	503.113	437.612	461.123	444.325	493.112	497.135	469.787	467.149	468.456	506.887	484.641	516.523	532.182	471.43	217.211	215.063	206.97	202.603	176.332	135.376	227.432	205.277	190.315	189.4	148.433	226.098	228.321	218.873	199.813	174.005	1283.17	1350.61	1286.34	1298.04
sp|P46527|CDN1B_HUMAN	sp	P46527	HUMAN	CDKN1B	Cyclin-dependent kinase inhibitor 1B	0	1	0	1	2	4	6	5	0	0	0	0	0	0	0	0	0	0	0	0	0	0	0	0	56.9907	36.718	49.8335	46.5819	43.5933	39.5741	47.9656	51.4044	67.693	99.033	174.301	61.9755	59.2717	47.3133	56.6337	37.2683	310.276	315.18	563.71	309.751
sp|Q9NXV6|CARF_HUMAN	sp	Q9NXV6	HUMAN	CDKN2AIP	CDKN2A-interacting protein	9	7	1	0	24	18	22	21	860.126	861.22	824.795	798.795	772.803	810.859	905.572	851.972	852.045	850.914	938.22	901.988	876.906	876.602	904.59	980.844	454.199	443.819	394.576	409.057	411.832	413.629	448.973	427.935	418.098	491.938	504.139	430.521	440.483	426.225	428.437	449.656	4240.5	4130.13	4329.1	4203.7
sp|Q96HQ2|C2AIL_HUMAN	sp	Q96HQ2	HUMAN	CDKN2AIPNL	CDKN2AIP N-terminal-like protein	1	0	0	1	2	3	2	3	29.6854	23.1924	32.7223	29.8109	19.9383	20.5384	29.4676	36.6717	32.6178	26.8651	21.1035	34.9943	24.3752	33.1172	31.7001	28.7074	0	0	0	0	0	0	0	0	0	0	0	0	0	0	0	0	165.961	179.161	152.445	174.88
sp|P42773|CDN2C_HUMAN	sp	P42773	HUMAN	CDKN2C	Cyclin-dependent kinase 4 inhibitor C	6	3	1	0	5	7	6	2	482.933	478.258	438.041	438.982	471.249	434.342	453.134	458.461	481.65	490.503	490.393	453.637	482.858	537.234	614.855	859.311	180.158	178.222	167.866	169.836	160.958	195.899	173.296	154.767	170.204	168.588	174.715	184.577	181.851	197.06	197.789	259.669	653.727	588.57	592.406	534.271
sp|Q01850|CDR2_HUMAN	sp	Q01850	HUMAN	CDR2	Cerebellar degeneration-related protein 2	2	3	1	0	10	9	7	12	308.537	261.816	197.548	130.743	112.511	110.262	268.752	209.611	185.255	169.23	232.353	366.438	320.436	221.463	174.535	149.603	594.069	452.527	388.55	296.352	260.591	241.499	518.478	375.252	384.385	332.39	429.757	609.085	629.661	577.218	457.133	505.834	1436.1	1337.36	1228.09	1344.89
sp|Q86X02|CDR2L_HUMAN	sp	Q86X02	HUMAN	CDR2L	Cerebellar degeneration-related protein 2-like	0	2	0	1	6	9	8	5	0	0	0	0	0	0	0	0	0	0	0	0	0	0	0	0	59.7752	70.1103	61.6667	47.3309	60.2419	67.1467	71.0037	59.6091	59.2383	60.3634	51.5092	76.9017	63.9724	64.6339	60.2564	54.8515	637.389	714.142	638.753	642.181
sp|O95674|CDS2_HUMAN	sp	O95674	HUMAN	CDS2	Phosphatidate cytidylyltransferase 2	2	1	1	0	5	3	3	3	140.744	143.855	146.579	139.439	126.658	135.469	129.535	147.176	146.705	138.683	138.275	110.316	145.489	164.65	147.756	157.999	17.4536	23.3879	18.6833	20.3096	18.7744	20.4934	21.3156	13.4242	20.062	17.6311	18.2698	15.8473	16.3791	18.5861	16.9554	20.6162	847.735	824.577	920.623	840.18
sp|Q9UKY7|CDV3_HUMAN	sp	Q9UKY7	HUMAN	CDV3	Protein CDV3 homolog	37	29	1	0	39	30	21	24	3838.11	3949.58	3717.51	3722.18	3717.43	3463.33	3909.88	3792.6	3768.59	3635.15	3654.54	3960.81	3997.67	3893.29	4045.56	4063.79	2507.93	2565.61	2304.37	2400.36	2467.36	2429.5	2427.29	2451.58	2400.61	2337.47	2169.18	2458.4	2458.62	2492.7	2349.38	2268.52	4882.62	4903.23	4664.42	4628.56
[truncated: 6,607 more rows]
[truncated: 42 more columns]

## Sheet: Plotter
Type the name of a protein in B3:
[truncated: 18 more rows]

## Sheet: Lookup
MVA																					VACV
[truncated: 37 more rows]
