# Supplementary material for: Quantitative temporal analysis of modified vaccinia Ankara, the monkeypox and smallpox vaccine
Source: Research Square preprint supplement (doi:10.21203/rs.3.rs-1850393/v1), 2022-07-13
Supplement: Supplementary file 2 [file 55970760dad165d2748e2006.xlsx]

## Sheet: A - MVA downregulated
383 Proteins downregulated > 2 fold by MVA
Uniprot	Gene Symbol	Description			Significantly enriched clusters and their components from DAVID analysis
P25963	NFKBIA	NF-kappa-B inhibitor alpha			Term:	Secreted, 4.9 fold enrichment, p=1.68e-36
Q13490	BIRC2	Baculoviral IAP repeat-containing protein 2			Uniprot-I	Gene	Description
Q96E35	ZMYND19	Zinc finger MYND domain-containing protein 19			P02452	COL1A1	Collagen alpha-1(I) chain
Q15361	TTF1	Transcription termination factor 1			P24043	LAMA2	Laminin subunit alpha-2
Q00839	HNRNPU	Heterogeneous nuclear ribonucleoprotein U			P55268	LAMB2	Laminin subunit beta-2
Q5JTW2	CEP78	Isoform 2 of Centrosomal protein of 78 kDa			P13747	HLA-E	HLA class I histocompatibility antigen, alpha chain E
Q8TAA5	GRPEL2	GrpE protein homolog 2, mitochondrial			P58215	LOXL3	Lysyl oxidase homolog 3
Q9BSJ6	FAM64A	Protein FAM64A			O00300	TNFRSF11B	Tumor necrosis factor receptor superfamily member 11B
Q9BY12	SCAPER	S phase cyclin A-associated protein in the endoplasmic reticulum			Q16270	IGFBP7	Insulin-like growth factor-binding protein 7
Q8TDD1	DDX54	Isoform 2 of ATP-dependent RNA helicase DDX54			P00749	PLAU	Urokinase-type plasminogen activator
Q9BVL2	NUP58	Nucleoporin p58/p45			O00391	QSOX1	Sulfhydryl oxidase 1
Q9UKT4	FBXO5	F-box only protein 5			P17948	FLT1	Vascular endothelial growth factor receptor 1
Q7Z3B4	NUP54	Nucleoporin p54			Q02818	NUCB1	Nucleobindin-1
O75326	SEMA7A	Semaphorin-7A			P08123	COL1A2	Collagen alpha-2(I) chain
P37198	NUP62	Nuclear pore glycoprotein p62			Q9UI42	CPA4	Carboxypeptidase A4
O75592	MYCBP2	E3 ubiquitin-protein ligase MYCBP2			P39060	COL18A1	Collagen alpha-1(XVIII) chain
Q9H9L3	ISG20L2	Interferon-stimulated 20 kDa exonuclease-like 2			P43235	CTSK	Cathepsin K
P35555	FBN1	Fibrillin-1			P21246	PTN	Pleiotrophin
Q9UNZ5	C19orf53	Leydig cell tumor 10 kDa protein homolog			P07996	THBS1	Thrombospondin-1
Q9NZJ5	EIF2AK3	Eukaryotic translation initiation factor 2-alpha kinase 3			P01034	CST3	Cystatin-C
P13196	ALAS1	5-aminolevulinate synthase, nonspecific, mitochondrial			P01033	TIMP1	Metalloproteinase inhibitor 1
Q9Y657	SPIN1	Spindlin-1			Q9UKU9	ANGPTL2	Angiopoietin-related protein 2
Q6PK04	CCDC137	Coiled-coil domain-containing protein 137			P07711	CTSL	Cathepsin L1
O95478	NSA2	Ribosome biogenesis protein NSA2 homolog			Q9NNX1	TUFT1	Tuftelin
Q15004	KIAA0101	PCNA-associated factor			P12109	COL6A1	Collagen alpha-1(VI) chain
Q96P11	NSUN5	Isoform 2 of Probable 28S rRNA (cytosine-C(5))-methyltransferase			Q6EMK4	VASN	Vasorin
Q5TEA3	C20orf194	Uncharacterized protein C20orf194			O95965	ITGBL1	Integrin beta-like protein 1
Q9H9Y2	RPF1	Ribosome production factor 1			P19021	PAM	Isoform 5 of Peptidyl-glycine alpha-amidating monooxygenase
Q13822	ENPP2	Isoform 2 of Ectonucleotide pyrophosphatase/phosphodiesterase family member 2			Q9BTY2	FUCA2	Plasma alpha-L-fucosidase
Q9H3C7	GGNBP2	Gametogenetin-binding protein 2			P12107	COL11A1	Collagen alpha-1(XI) chain
Q9GZX9	TWSG1	Twisted gastrulation protein homolog 1			P35052	GPC1	Glypican-1
O60318	MCM3AP	Germinal-center associated nuclear protein			Q9NS15	LTBP3	Latent-transforming growth factor beta-binding protein 3
Q9H8M1	COQ10B	Coenzyme Q-binding protein COQ10 homolog B, mitochondrial			P12110	COL6A2	Collagen alpha-2(VI) chain
P35556	FBN2	Fibrillin-2			P16035	TIMP2	Metalloproteinase inhibitor 2
Q9P0S2	COX16	Cytochrome c oxidase assembly protein COX16 homolog, mitochondrial			Q4LDE5	SVEP1	Sushi, von Willebrand factor type A, EGF and pentraxin domain-containing protein 1
O15460	P4HA2	Prolyl 4-hydroxylase subunit alpha-2			P21810	BGN	Biglycan
Q6DKI1	RPL7L1	60S ribosomal protein L7-like 1			P00736	C1R	Complement C1r subcomponent
Q8NFW8	CMAS	N-acylneuraminate cytidylyltransferase			P08572	COL4A2	Collagen alpha-2(IV) chain
Q96GQ7	DDX27	Probable ATP-dependent RNA helicase DDX27			P08253	MMP2	72 kDa type IV collagenase
Q8N137	CNTROB	Isoform 2 of Centrobin			Q99715	COL12A1	Collagen alpha-1(XII) chain
P16989	YBX3	Y-box-binding protein 3			P05067	APP	Amyloid beta A4 protein
Q9NQX5	NPDC1	Neural proliferation differentiation and control protein 1			Q15113	PCOLCE	Procollagen C-endopeptidase enhancer 1
Q9HC62	SENP2	Sentrin-specific protease 2			Q16363	LAMA4	Laminin subunit alpha-4
Q9Y2V0	C15orf41	Uncharacterized protein C15orf41			P07602	PSAP	Isoform Sap-mu-9 of Prosaposin
Q495W5	FUT11	Alpha-(1,3)-fucosyltransferase 11			Q13214	SEMA3B	Semaphorin-3B
O15079	SNPH	Isoform 2 of Syntaphilin			Q12841	FSTL1	Follistatin-related protein 1
P54274	TERF1	Telomeric repeat-binding factor 1			Q9Y287	ITM2B	Integral membrane protein 2B
Q86X95	CIR1	Corepressor interacting with RBPJ 1			P25391	LAMA1	Laminin subunit alpha-1
Q9BW61	DDA1	DET1- and DDB1-associated protein 1			Q08380	LGALS3BP	Galectin-3-binding protein
P53567	CEBPG	CCAAT/enhancer-binding protein gamma			O94964	SOGA1	Isoform 2 of Protein SOGA1
Q99567	NUP88	Nuclear pore complex protein Nup88			Q6UWY0	ARSK	Arylsulfatase K
Q96QE3	ATAD5	ATPase family AAA domain-containing protein 5			P35555	FBN1	Fibrillin-1
Q96MT8	CEP63	Centrosomal protein of 63 kDa			P17405	SMPD1	Sphingomyelin phosphodiesterase
O75319	DUSP11	RNA/RNP complex-1-interacting phosphatase			P12111	COL6A3	Collagen alpha-3(VI) chain
Q53EP0	FNDC3B	Fibronectin type III domain-containing protein 3B			P51884	LUM	Lumican
P14921	ETS1	Protein C-ets-1			P35556	FBN2	Fibrillin-2
Q9Y2J4	AMOTL2	Isoform 4 of Angiomotin-like protein 2			O75094	SLIT3	Isoform 4 of Slit homolog 3 protein
Q9NW13	RBM28	RNA-binding protein 28			P40189	IL6ST	Interleukin-6 receptor subunit beta
Q15653	NFKBIB	NF-kappa-B inhibitor beta			O76061	STC2	Stanniocalcin-2
Q15014	MORF4L2	Mortality factor 4-like protein 2			Q99985	SEMA3C	Semaphorin-3C
Q6ICL3	TANGO2	Isoform 4 of Transport and Golgi organization protein 2 homolog			Q8N6Y2	LRRC17	Leucine-rich repeat-containing protein 17
Q99640	PKMYT1	Membrane-associated tyrosine- and threonine-specific cdc2-inhibitory kinase			Q14393	GAS6	Growth arrest-specific protein 6
O15525	MAFG	Transcription factor MafG			P01137	TGFB1	Transforming growth factor beta-1
Q53GS7	GLE1	Nucleoporin GLE1			Q16610	ECM1	Isoform 4 of Extracellular matrix protein 1
Q9BYG3	NIFK	MKI67 FHA domain-interacting nucleolar phosphoprotein			Q14112	NID2	Nidogen-2
Q14135	VGLL4	Isoform 4 of Transcription cofactor vestigial-like protein 4			Q05707	COL14A1	Collagen alpha-1(XIV) chain
Q6P0N0	MIS18BP1	Mis18-binding protein 1			Q9GZX9	TWSG1	Twisted gastrulation protein homolog 1
A8MTZ0	BBIP1	BBSome-interacting protein 1			P02461	COL3A1	Collagen alpha-1(III) chain
Q8N4C6	NIN	Isoform 7 of Ninein			P23142	FBLN1	Fibulin-1
Q9BXS6	NUSAP1	Nucleolar and spindle-associated protein 1			P05997	COL5A2	Collagen alpha-2(V) chain
Q9UKA8	RCAN3	Calcipressin-3			Q92626	PXDN	Peroxidasin homolog
P24928	POLR2A	DNA-directed RNA polymerase II subunit RPB1			Q76M96	CCDC80	Isoform 2 of Coiled-coil domain-containing protein 80
O75683	SURF6	Surfeit locus protein 6			P48740	MASP1	Isoform 2 of Mannan-binding lectin serine protease 1
O14773	TPP1	Tripeptidyl-peptidase 1			Q13822	ENPP2	Isoform 2 of Ectonucleotide pyrophosphatase/phosphodiesterase family member 2
Q96Q89	KIF20B	Isoform 2 of Kinesin-like protein KIF20B			P43251	BTD	Isoform 2 of Biotinidase
P12814	ACTN1	Alpha-actinin-1			P20908	COL5A1	Collagen alpha-1(V) chain
P49746	THBS3	Thrombospondin-3			Q9NZV1	CRIM1	Cysteine-rich motor neuron 1 protein
P00749	PLAU	Urokinase-type plasminogen activator			P14543	NID1	Nidogen-1
Q02818	NUCB1	Nucleobindin-1			P19438	TNFRSF1A	Tumor necrosis factor receptor superfamily member 1A
Q9P031	CCDC59	Thyroid transcription factor 1-associated protein 26			Q9NRN5	OLFML3	Olfactomedin-like protein 3
P35658	NUP214	Isoform 5 of Nuclear pore complex protein Nup214			P02458	COL2A1	Collagen alpha-1(II) chain
Q1ED39	KNOP1	Lysine-rich nucleolar protein 1			O94813	SLIT2	Slit homolog 2 protein
Q13214	SEMA3B	Semaphorin-3B			P07585	DCN	Decorin
Q9UKV5	AMFR	E3 ubiquitin-protein ligase AMFR			P09486	SPARC	SPARC
P07602	PSAP	Isoform Sap-mu-9 of Prosaposin			P05121	SERPINE1	Plasminogen activator inhibitor 1
P01137	TGFB1	Transforming growth factor beta-1			P61812	TGFB2	Isoform B of Transforming growth factor beta-2
Q15034	HERC3	Probable E3 ubiquitin-protein ligase HERC3			Q15773	MLF2	Myeloid leukemia factor 2
Q99985	SEMA3C	Semaphorin-3C			P10909	CLU	Isoform 2 of Clusterin
O15015	ZNF646	Isoform 2 of Zinc finger protein 646
P61812	TGFB2	Isoform B of Transforming growth factor beta-2			Term:	Extracellular matrix, 10.7 fold enrichment, p=3.95e-20
Q9NZL6	RGL1	Isoform B of Ral guanine nucleotide dissociation stimulator-like 1			Uniprot-I	Gene	Description
P54098	POLG	DNA polymerase subunit gamma-1			P02452	COL1A1	Collagen alpha-1(I) chain
O00300	TNFRSF11B	Tumor necrosis factor receptor superfamily member 11B			P24043	LAMA2	Laminin subunit alpha-2
Q8TF40	FNIP1	Folliculin-interacting protein 1			P55268	LAMB2	Laminin subunit beta-2
O75762	TRPA1	Transient receptor potential cation channel subfamily A member 1			P25391	LAMA1	Laminin subunit alpha-1
Q6ZUT9	DENND5B	Isoform 2 of DENN domain-containing protein 5B			P35555	FBN1	Fibrillin-1
Q969X0	RILPL2	RILP-like protein 2			P51884	LUM	Lumican
Q7Z4N8	P4HA3	Isoform 3 of Prolyl 4-hydroxylase subunit alpha-3			P35556	FBN2	Fibrillin-2
Q14207	NPAT	Protein NPAT			Q16270	IGFBP7	Insulin-like growth factor-binding protein 7
Q6P4F7	ARHGAP11A	Rho GTPase-activating protein 11A			P08123	COL1A2	Collagen alpha-2(I) chain
Q9BYX7	POTEKP	Putative beta-actin-like protein 3			P39060	COL18A1	Collagen alpha-1(XVIII) chain
Q99741	CDC6	Cell division control protein 6 homolog			Q16610	ECM1	Isoform 4 of Extracellular matrix protein 1
P35544	FAU	Ubiquitin-like protein FUBI			Q14112	NID2	Nidogen-2
Q8ND90	PNMA1	Paraneoplastic antigen Ma1			Q05707	COL14A1	Collagen alpha-1(XIV) chain
O43164	PJA2	E3 ubiquitin-protein ligase Praja-2			P07996	THBS1	Thrombospondin-1
P19021	PAM	Isoform 5 of Peptidyl-glycine alpha-amidating monooxygenase			P02461	COL3A1	Collagen alpha-1(III) chain
Q0D2I5	IFFO1	Isoform 5 of Intermediate filament family orphan 1			P23142	FBLN1	Fibulin-1
Q8TEL6	TRPC4AP	Short transient receptor potential channel 4-associated protein			P05997	COL5A2	Collagen alpha-2(V) chain
Q9NPA3	MID1IP1	Mid1-interacting protein 1			Q92626	PXDN	Peroxidasin homolog
O15417	TNRC18	Trinucleotide repeat-containing gene 18 protein			P20908	COL5A1	Collagen alpha-1(V) chain
Q99967	CITED2	Cbp/p300-interacting transactivator 2			P12107	COL11A1	Collagen alpha-1(XI) chain
Q15113	PCOLCE	Procollagen C-endopeptidase enhancer 1			P35442	THBS2	Thrombospondin-2
P55061	TMBIM6	Isoform 2 of Bax inhibitor 1			P14543	NID1	Nidogen-1
Q9BT92	TCHP	Trichoplein keratin filament-binding protein			P21810	BGN	Biglycan
Q96F45	ZNF503	Zinc finger protein 503			P02458	COL2A1	Collagen alpha-1(II) chain
P01033	TIMP1	Metalloproteinase inhibitor 1			P08572	COL4A2	Collagen alpha-2(IV) chain
P09486	SPARC	SPARC			P09486	SPARC	SPARC
P00736	C1R	Complement C1r subcomponent			Q15113	PCOLCE	Procollagen C-endopeptidase enhancer 1
Q9Y5V3	MAGED1	Isoform 2 of Melanoma-associated antigen D1			Q16363	LAMA4	Laminin subunit alpha-4
P02452	COL1A1	Collagen alpha-1(I) chain			P49746	THBS3	Thrombospondin-3
Q12841	FSTL1	Follistatin-related protein 1
Q86Y13	DZIP3	E3 ubiquitin-protein ligase DZIP3			Term:	Cell attachment site, 11.5 fold enrichment, p=1.6e-13
Q9H3L0	MMADHC	Methylmalonic aciduria and homocystinuria type D protein, mitochondrial			Uniprot-I	Gene	Description
Q7Z4F1	LRP10	Low-density lipoprotein receptor-related protein 10			P02452	COL1A1	Collagen alpha-1(I) chain
P35658	NUP214	Isoform 5 of Nuclear pore complex protein Nup214			P05997	COL5A2	Collagen alpha-2(V) chain
O00767	SCD	Acyl-CoA desaturase			O75326	SEMA7A	Semaphorin-7A
Q12834	CDC20	Cell division cycle protein 20 homolog			P12109	COL6A1	Collagen alpha-1(VI) chain
Q8NEZ5	FBXO22	F-box only protein 22			O75976	CPD	Carboxypeptidase D
Q5T1J5	CHCHD2P9	Putative coiled-coil-helix-coiled-coil-helix domain-containing protein CHCHD2P9, mitochondrial			P25391	LAMA1	Laminin subunit alpha-1
Q86XR8	CEP57	Centrosomal protein of 57 kDa			Q13822	ENPP2	Isoform 2 of Ectonucleotide pyrophosphatase/phosphodiesterase family member 2
Q7Z2W4	ZC3HAV1	Zinc finger CCCH-type antiviral protein 1			P35555	FBN1	Fibrillin-1
P50616	TOB1	Protein Tob1			P35442	THBS2	Thrombospondin-2
Q9UI42	CPA4	Carboxypeptidase A4			P12111	COL6A3	Collagen alpha-3(VI) chain
P17707	AMD1	S-adenosylmethionine decarboxylase proenzyme			Q9NZV1	CRIM1	Cysteine-rich motor neuron 1 protein
Q9UGY1	NOL12	Nucleolar protein 12			P14543	NID1	Nidogen-1
P01034	CST3	Cystatin-C			P12110	COL6A2	Collagen alpha-2(VI) chain
Q9NWQ9	C14orf119	Uncharacterized protein C14orf119			Q4LDE5	SVEP1	Sushi, von Willebrand factor type A, EGF and pentraxin domain-containing protein 1
Q14106	TOB2	Protein Tob2			P39060	COL18A1	Collagen alpha-1(XVIII) chain
O14746	TERT	Telomerase reverse transcriptase			P01137	TGFB1	Transforming growth factor beta-1
P48740	MASP1	Isoform 2 of Mannan-binding lectin serine protease 1			Q99715	COL12A1	Collagen alpha-1(XII) chain
Q13127	REST	RE1-silencing transcription factor			Q05707	COL14A1	Collagen alpha-1(XIV) chain
O95864	FADS2	Fatty acid desaturase 2			Q16363	LAMA4	Laminin subunit alpha-4
O15370	SOX12	Transcription factor SOX-12			P07996	THBS1	Thrombospondin-1
P08123	COL1A2	Collagen alpha-2(I) chain
Q9Y597	KCTD3	BTB/POZ domain-containing protein KCTD3			Term:	EGF-like domain, 6.7 fold enrichment, p=9.09e-10
P35869	AHR	Aryl hydrocarbon receptor			Uniprot-I	Gene	Description
Q6FIF0	ZFAND6	AN1-type zinc finger protein 6			P02452	COL1A1	Collagen alpha-1(I) chain
Q96EU6	RRP36	Ribosomal RNA processing protein 36 homolog			P02461	COL3A1	Collagen alpha-1(III) chain
P23142	FBLN1	Fibulin-1			P05997	COL5A2	Collagen alpha-2(V) chain
P24043	LAMA2	Laminin subunit alpha-2			Q92626	PXDN	Peroxidasin homolog
Q14201	BTG3	Isoform 2 of Protein BTG3			P20908	COL5A1	Collagen alpha-1(V) chain
P51884	LUM	Lumican			P12107	COL11A1	Collagen alpha-1(XI) chain
P05067	APP	Amyloid beta A4 protein			P58215	LOXL3	Lysyl oxidase homolog 3
Q96BA8	CREB3L1	Cyclic AMP-responsive element-binding protein 3-like protein 1			P51884	LUM	Lumican
Q15038	DAZAP2	DAZ-associated protein 2			P08123	COL1A2	Collagen alpha-2(I) chain
P51587	BRCA2	Breast cancer type 2 susceptibility protein			P02458	COL2A1	Collagen alpha-1(II) chain
Q96BY9	SARAF	Store-operated calcium entry-associated regulatory factor			Q99715	COL12A1	Collagen alpha-1(XII) chain
O00391	QSOX1	Sulfhydryl oxidase 1			P61812	TGFB2	Isoform B of Transforming growth factor beta-2
Q16270	IGFBP7	Insulin-like growth factor-binding protein 7			Q05707	COL14A1	Collagen alpha-1(XIV) chain
P19438	TNFRSF1A	Tumor necrosis factor receptor superfamily member 1A
A6ZKI3	FAM127A	Protein FAM127A			Term:	Laminin G domain, 11.4 fold enrichment, p=5.04e-9
Q9GZM8	NDEL1	Isoform 3 of Nuclear distribution protein nudE-like 1			Uniprot-I	Gene	Description
P08910	ABHD2	Monoacylglycerol lipase ABHD2			P24043	LAMA2	Laminin subunit alpha-2
Q7Z7L7	ZER1	Protein zer-1 homolog			P25391	LAMA1	Laminin subunit alpha-1
Q5JPI3	C3orf38	Uncharacterized protein C3orf38			P20908	COL5A1	Collagen alpha-1(V) chain
Q9H0U9	TSPYL1	Testis-specific Y-encoded-like protein 1			P12107	COL11A1	Collagen alpha-1(XI) chain
P35226	BMI1	Polycomb complex protein BMI-1			P35442	THBS2	Thrombospondin-2
Q6PL18	ATAD2	ATPase family AAA domain-containing protein 2			O75094	SLIT3	Isoform 4 of Slit homolog 3 protein
Q8N2W9	PIAS4	E3 SUMO-protein ligase PIAS4			P39060	COL18A1	Collagen alpha-1(XVIII) chain
P05997	COL5A2	Collagen alpha-2(V) chain			O94813	SLIT2	Slit homolog 2 protein
Q86WW8	COA5	Cytochrome c oxidase assembly factor 5			Q14393	GAS6	Growth arrest-specific protein 6
Q86WA8	LONP2	Lon protease homolog 2, peroxisomal			Q99715	COL12A1	Collagen alpha-1(XII) chain
Q9BRU2	TCEAL7	Transcription elongation factor A protein-like 7			Q05707	COL14A1	Collagen alpha-1(XIV) chain
Q4LDE5	SVEP1	Sushi, von Willebrand factor type A, EGF and pentraxin domain-containing protein 1			Q16363	LAMA4	Laminin subunit alpha-4
P12757	SKIL	Ski-like protein			P07996	THBS1	Thrombospondin-1
Q16610	ECM1	Isoform 4 of Extracellular matrix protein 1			P49746	THBS3	Thrombospondin-3
Q96DZ5	CLIP3	CAP-Gly domain-containing linker protein 3
Q15773	MLF2	Myeloid leukemia factor 2			Term:	Basement membrane, 10.7 fold enrichment, p=1.1e-6
Q9NZV1	CRIM1	Cysteine-rich motor neuron 1 protein			Uniprot-I	Gene	Description
Q9H3M7	TXNIP	Thioredoxin-interacting protein			P24043	LAMA2	Laminin subunit alpha-2
P02458	COL2A1	Collagen alpha-1(II) chain			P25391	LAMA1	Laminin subunit alpha-1
Q9NY74	ETAA1	Ewing's tumor-associated antigen 1			P20908	COL5A1	Collagen alpha-1(V) chain
Q9NRN5	OLFML3	Olfactomedin-like protein 3			P12107	COL11A1	Collagen alpha-1(XI) chain
Q8N3C7	CLIP4	CAP-Gly domain-containing linker protein 4			P35442	THBS2	Thrombospondin-2
Q9UGL1	KDM5B	Isoform 2 of Lysine-specific demethylase 5B			O75094	SLIT3	Isoform 4 of Slit homolog 3 protein
P10909	CLU	Isoform 2 of Clusterin			P39060	COL18A1	Collagen alpha-1(XVIII) chain
Q16363	LAMA4	Laminin subunit alpha-4			O94813	SLIT2	Slit homolog 2 protein
Q9Y6X2	PIAS3	E3 SUMO-protein ligase PIAS3			Q14393	GAS6	Growth arrest-specific protein 6
Q99715	COL12A1	Collagen alpha-1(XII) chain			Q99715	COL12A1	Collagen alpha-1(XII) chain
O15119	TBX3	T-box transcription factor TBX3			Q05707	COL14A1	Collagen alpha-1(XIV) chain
P21810	BGN	Biglycan			Q16363	LAMA4	Laminin subunit alpha-4
Q96S38	RPS6KC1	Ribosomal protein S6 kinase delta-1			P07996	THBS1	Thrombospondin-1
P07585	DCN	Decorin			P49746	THBS3	Thrombospondin-3
Q08117	AES	Isoform 2 of Amino-terminal enhancer of split
Q6P1M9	ARMCX5	Armadillo repeat-containing X-linked protein 5			Term:	Leucine rich repeats, 13 fold enrichment, p=3.41e-6
P08572	COL4A2	Collagen alpha-2(IV) chain			Uniprot-I	Gene	Description
P02461	COL3A1	Collagen alpha-1(III) chain			O75094	SLIT3	Isoform 4 of Slit homolog 3 protein
P12110	COL6A2	Collagen alpha-2(VI) chain			P21810	BGN	Biglycan
Q99081	TCF12	Isoform 3 of Transcription factor 12			Q92626	PXDN	Peroxidasin homolog
Q92624	APPBP2	Amyloid protein-binding protein 2			Q6EMK4	VASN	Vasorin
Q6EMK4	VASN	Vasorin			Q6UXM1	LRIG3	Leucine-rich repeats and immunoglobulin-like domains protein 3
Q9NWD8	TMEM248	Transmembrane protein 248			O94898	LRIG2	Leucine-rich repeats and immunoglobulin-like domains protein 2
Q5JVL4	EFHC1	EF-hand domain-containing protein 1			Q8N6Y2	LRRC17	Leucine-rich repeat-containing protein 17
Q5T3J3	LRIF1	Ligand-dependent nuclear receptor-interacting factor 1			P07585	DCN	Decorin
P33552	CKS2	Cyclin-dependent kinases regulatory subunit 2			O94813	SLIT2	Slit homolog 2 protein
Q92896	GLG1	Isoform 2 of Golgi apparatus protein 1			P51884	LUM	Lumican
Q9UBC1	NFKBIL1	NF-kappa-B inhibitor-like protein 1
Q9UKI2	CDC42EP3	Cdc42 effector protein 3			Term:	Calcium binding, 7.4 fold enrichment, p=7.55e-6
Q9BZL1	UBL5	Ubiquitin-like protein 5			Uniprot-I	Gene	Description
P59923	ZNF445	Zinc finger protein 445			P23142	FBLN1	Fibulin-1
Q06481	APLP2	Amyloid-like protein 2			P48740	MASP1	Isoform 2 of Mannan-binding lectin serine protease 1
O76061	STC2	Stanniocalcin-2			P35555	FBN1	Fibrillin-1
Q9Y287	ITM2B	Integral membrane protein 2B			P14543	NID1	Nidogen-1
Q9BSY4	CHCHD5	Isoform 2 of Coiled-coil-helix-coiled-coil-helix domain-containing protein 5			P35556	FBN2	Fibrillin-2
P05121	SERPINE1	Plasminogen activator inhibitor 1			O75094	SLIT3	Isoform 4 of Slit homolog 3 protein
Q9C035	TRIM5	Tripartite motif-containing protein 5			Q9NS15	LTBP3	Latent-transforming growth factor beta-binding protein 3
Q8TD31	CCHCR1	Isoform 2 of Coiled-coil alpha-helical rod protein 1			Q4LDE5	SVEP1	Sushi, von Willebrand factor type A, EGF and pentraxin domain-containing protein 1
Q8NBJ4	GOLM1	Golgi membrane protein 1			P00736	C1R	Complement C1r subcomponent
Q9UKU9	ANGPTL2	Angiopoietin-related protein 2			O94813	SLIT2	Slit homolog 2 protein
O94964	SOGA1	Isoform 2 of Protein SOGA1			Q14393	GAS6	Growth arrest-specific protein 6
O95965	ITGBL1	Integrin beta-like protein 1			Q14112	NID2	Nidogen-2
P07711	CTSL	Cathepsin L1			P49746	THBS3	Thrombospondin-3
Q9HBU6	ETNK1	Ethanolamine kinase 1
P30530	AXL	Tyrosine-protein kinase receptor UFO			Term:	Collagen fibril organisation, 17 fold enrichment, p=1.29e-4
Q86WP2	GPBP1	Isoform 2 of Vasculin			Uniprot-I	Gene	Description
Q14393	GAS6	Growth arrest-specific protein 6			P02452	COL1A1	Collagen alpha-1(I) chain
Q86TB3	ALPK2	Alpha-protein kinase 2			P02461	COL3A1	Collagen alpha-1(III) chain
Q99538	LGMN	Legumain			P05997	COL5A2	Collagen alpha-2(V) chain
Q96EK4	THAP11	THAP domain-containing protein 11			Q92626	PXDN	Peroxidasin homolog
P07996	THBS1	Thrombospondin-1			P20908	COL5A1	Collagen alpha-1(V) chain
O60337	MARCHF6	E3 ubiquitin-protein ligase MARCH6			P12107	COL11A1	Collagen alpha-1(XI) chain
Q9P2J3	KLHL9	Kelch-like protein 9			P58215	LOXL3	Lysyl oxidase homolog 3
O75787	ATP6AP2	Renin receptor			P51884	LUM	Lumican
Q9NS15	LTBP3	Latent-transforming growth factor beta-binding protein 3			P08123	COL1A2	Collagen alpha-2(I) chain
P41134	ID1	DNA-binding protein inhibitor ID-1			P02458	COL2A1	Collagen alpha-1(II) chain
Q5T6S3	PHF19	PHD finger protein 19			Q99715	COL12A1	Collagen alpha-1(XII) chain
Q9NWK9	ZNHIT6	Box C/D snoRNA protein 1			P61812	TGFB2	Isoform B of Transforming growth factor beta-2
Q9BRK3	MXRA8	Matrix-remodeling-associated protein 8			Q05707	COL14A1	Collagen alpha-1(XIV) chain
O43439	CBFA2T2	Isoform 4 of Protein CBFA2T2
Q01850	CDR2	Cerebellar degeneration-related protein 2			Term:	Amoebiasis, 5.5 fold enrichment, p=0.0012
Q86U06	RBM23	Isoform 2 of Probable RNA-binding protein 23			Uniprot-I	Gene	Description
P35052	GPC1	Glypican-1			P02452	COL1A1	Collagen alpha-1(I) chain
Q9NX18	SDHAF2	Succinate dehydrogenase assembly factor 2, mitochondrial			P24043	LAMA2	Laminin subunit alpha-2
P40189	IL6ST	Interleukin-6 receptor subunit beta			P02461	COL3A1	Collagen alpha-1(III) chain
Q9NQX7	ITM2C	Integral membrane protein 2C			P55268	LAMB2	Laminin subunit beta-2
Q9H173	SIL1	Nucleotide exchange factor SIL1			P25391	LAMA1	Laminin subunit alpha-1
P21246	PTN	Pleiotrophin			P12814	ACTN1	Alpha-actinin-1
Q8WTP8	AEN	Isoform 2 of Apoptosis-enhancing nuclease			P08123	COL1A2	Collagen alpha-2(I) chain
Q9UBU8	MORF4L1	Mortality factor 4-like protein 1			P08572	COL4A2	Collagen alpha-2(IV) chain
P35442	THBS2	Thrombospondin-2			P01137	TGFB1	Transforming growth factor beta-1
P20908	COL5A1	Collagen alpha-1(V) chain			P61812	TGFB2	Isoform B of Transforming growth factor beta-2
Q9NYA4	MTMR4	Myotubularin-related protein 4			Q16363	LAMA4	Laminin subunit alpha-4
Q92685	ALG3	Dol-P-Man:Man(5)GlcNAc(2)-PP-Dol alpha-1,3-mannosyltransferase
Q9BX70	BTBD2	BTB/POZ domain-containing protein 2			Term:	Zymogen, 3.9 fold enrichment, p=0.0044
Q6NTE8	MRNIP	MRN complex-interacting protein			Uniprot-I	Gene	Description
P13747	HLA-E	HLA class I histocompatibility antigen, alpha chain E			P07711	CTSL	Cathepsin L1
Q96NM4	TOX2	Isoform 2 of TOX high mobility group box family member 2			P00749	PLAU	Urokinase-type plasminogen activator
Q9NYJ1	COA4	Isoform 2 of Cytochrome c oxidase assembly factor 4 homolog, mitochondrial			P50281	MMP14	Matrix metalloproteinase-14
Q9Y5A9	YTHDF2	YTH domain-containing family protein 2			O14773	TPP1	Tripeptidyl-peptidase 1
P55268	LAMB2	Laminin subunit beta-2			P17707	AMD1	S-adenosylmethionine decarboxylase proenzyme
P17405	SMPD1	Sphingomyelin phosphodiesterase			Q9UI42	CPA4	Carboxypeptidase A4
Q7Z7M9	GALNT5	Polypeptide N-acetylgalactosaminyltransferase 5			P08253	MMP2	72 kDa type IV collagenase
O00762	UBE2C	Ubiquitin-conjugating enzyme E2 C			P42575	CASP2	Caspase-2
Q05707	COL14A1	Collagen alpha-1(XIV) chain			P43235	CTSK	Cathepsin K
P13498	CYBA	Cytochrome b-245 light chain			Q99538	LGMN	Legumain
P16035	TIMP2	Metalloproteinase inhibitor 2
O43493	TGOLN2	Trans-Golgi network integral membrane protein 2			Term:	Immunoglobulin domain, 2.9 fold enrichment, p=0.012
O75094	SLIT3	Isoform 4 of Slit homolog 3 protein			Uniprot-I	Gene	Description
Q9BY42	RTFDC1	Protein RTF2 homolog			Q13214	SEMA3B	Semaphorin-3B
Q9UPP1	PHF8	Histone lysine demethylase PHF8			Q16270	IGFBP7	Insulin-like growth factor-binding protein 7
P39060	COL18A1	Collagen alpha-1(XVIII) chain			Q86TB3	ALPK2	Alpha-protein kinase 2
P08253	MMP2	72 kDa type IV collagenase			P40189	IL6ST	Interleukin-6 receptor subunit beta
Q9Y2U9	KLHDC2	Kelch domain-containing protein 2			Q99985	SEMA3C	Semaphorin-3C
Q96LL9	DNAJC30	DnaJ homolog subfamily C member 30			Q92626	PXDN	Peroxidasin homolog
Q5THK1	PRR14L	Protein PRR14L			O75326	SEMA7A	Semaphorin-7A
P25391	LAMA1	Laminin subunit alpha-1			Q6UXM1	LRIG3	Leucine-rich repeats and immunoglobulin-like domains protein 3
Q9P021	CRIPT	Cysteine-rich PDZ-binding protein			P17948	FLT1	Vascular endothelial growth factor receptor 1
P17948	FLT1	Vascular endothelial growth factor receptor 1			O94898	LRIG2	Leucine-rich repeats and immunoglobulin-like domains protein 2
Q96AY2	EME1	Isoform 2 of Crossover junction endonuclease EME1			Q9BRK3	MXRA8	Matrix-remodeling-associated protein 8
Q9BSV6	TSEN34	tRNA-splicing endonuclease subunit Sen34			P30530	AXL	Tyrosine-protein kinase receptor UFO
Q8IV08	PLD3	Phospholipase D3
Q9BVC6	TMEM109	Transmembrane protein 109			Term:	Laminin EGF-like domain, 7.2 fold enrichment, p=0.013
Q8TEY7	USP33	Ubiquitin carboxyl-terminal hydrolase 33			Uniprot-I	Gene	Description
P14543	NID1	Nidogen-1			O75094	SLIT3	Isoform 4 of Slit homolog 3 protein
Q9BTY2	FUCA2	Plasma alpha-L-fucosidase			P24043	LAMA2	Laminin subunit alpha-2
P43235	CTSK	Cathepsin K			P25391	LAMA1	Laminin subunit alpha-1
Q8TBC3	SHKBP1	SH3KBP1-binding protein 1			P39060	COL18A1	Collagen alpha-1(XVIII) chain
P11802	CDK4	Cyclin-dependent kinase 4			P12107	COL11A1	Collagen alpha-1(XI) chain
Q92626	PXDN	Peroxidasin homolog			O94813	SLIT2	Slit homolog 2 protein
P84101	SERF2	Small EDRK-rich factor 2			P35442	THBS2	Thrombospondin-2
Q5KU26	COLEC12	Collectin-12			Q16363	LAMA4	Laminin subunit alpha-4
Q9BR77	CCDC77	Coiled-coil domain-containing protein 77
P12107	COL11A1	Collagen alpha-1(XI) chain
Q8IZL2	MAML2	Mastermind-like protein 2			Term:	Lysosomal lumen, 3.9 fold enrichment, p=0.017
P30307	CDC25C	M-phase inducer phosphatase 3			Uniprot-I	Gene	Description
P17676	CEBPB	CCAAT/enhancer-binding protein beta			P35052	GPC1	Glypican-1
O94941	UBOX5	RING finger protein 37			P07602	PSAP	Isoform Sap-mu-9 of Prosaposin
O94898	LRIG2	Leucine-rich repeats and immunoglobulin-like domains protein 2			P07711	CTSL	Cathepsin L1
O75976	CPD	Carboxypeptidase D			P21810	BGN	Biglycan
Q9Y5J5	PHLDA3	Pleckstrin homology-like domain family A member 3			O14773	TPP1	Tripeptidyl-peptidase 1
Q6UXM1	LRIG3	Leucine-rich repeats and immunoglobulin-like domains protein 3			P07585	DCN	Decorin
Q9P0P0	RNF181	E3 ubiquitin-protein ligase RNF181			P17405	SMPD1	Sphingomyelin phosphodiesterase
O00311	CDC7	Cell division cycle 7-related protein kinase			Q8IV08	PLD3	Phospholipase D3
Q5VZ89	DENND4C	DENN domain-containing protein 4C			P43235	CTSK	Cathepsin K
O94782	USP1	Ubiquitin carboxyl-terminal hydrolase 1			P51884	LUM	Lumican
O95900	TRUB2	Probable tRNA pseudouridine synthase 2			Q99538	LGMN	Legumain
Q14061	COX17	Cytochrome c oxidase copper chaperone
Q6UWU4	C6orf89	Isoform 2 of Bombesin receptor-activated protein C6orf89			Term:	Metal binding, 1.24 fold enrichment, p=0.018
O75635	SERPINB7	Serpin B7			Uniprot-I	Gene	Description
Q86VG3	C11orf74	Uncharacterized protein C11orf74			P02452	COL1A1	Collagen alpha-1(I) chain
P43251	BTD	Isoform 2 of Biotinidase			Q7Z7M9	GALNT5	Polypeptide N-acetylgalactosaminyltransferase 5
O95273	CCNDBP1	Cyclin-D1-binding protein 1			O94941	UBOX5	RING finger protein 37
P14316	IRF2	Interferon regulatory factor 2			P12814	ACTN1	Alpha-actinin-1
Q96HI0	SENP5	Sentrin-specific protease 5			P58215	LOXL3	Lysyl oxidase homolog 3
O95613	PCNT	Pericentrin			Q96E35	ZMYND19	Zinc finger MYND domain-containing protein 19
Q08380	LGALS3BP	Galectin-3-binding protein			Q9C035	TRIM5	Tripartite motif-containing protein 5
Q13772	NCOA4	Isoform 4 of Nuclear receptor coactivator 4			P17029	ZKSCAN1	Zinc finger protein with KRAB and SCAN domains 1
Q9NNX1	TUFT1	Tuftelin			O43439	CBFA2T2	Isoform 4 of Protein CBFA2T2
P42575	CASP2	Caspase-2			Q96EK4	THAP11	THAP domain-containing protein 11
O94813	SLIT2	Slit homolog 2 protein			Q99640	PKMYT1	Membrane-associated tyrosine- and threonine-specific cdc2-inhibitory kinase
Q6W2J9	BCOR	BCL-6 corepressor			Q02818	NUCB1	Nucleobindin-1
Q6P5R6	RPL22L1	60S ribosomal protein L22-like 1			P08123	COL1A2	Collagen alpha-2(I) chain
Q5T7W7	TSTD2	Thiosulfate sulfurtransferase/rhodanese-like domain-containing protein 2			Q9UI42	CPA4	Carboxypeptidase A4
Q14318	FKBP8	Isoform 2 of Peptidyl-prolyl cis-trans isomerase FKBP8			P39060	COL18A1	Collagen alpha-1(XVIII) chain
Q99811	PRRX2	Paired mesoderm homeobox protein 2			Q9Y6X2	PIAS3	E3 SUMO-protein ligase PIAS3
P17948	FLT1	Vascular endothelial growth factor receptor 1			Q8N2W9	PIAS4	E3 SUMO-protein ligase PIAS4
P14373	TRIM27	Zinc finger protein RFP			O14746	TERT	Telomerase reverse transcriptase
Q969V6	MKL1	MKL/myocardin-like protein 1			P01033	TIMP1	Metalloproteinase inhibitor 1
Q9UGN5	PARP2	Poly [ADP-ribose] polymerase 2			Q13127	REST	RE1-silencing transcription factor
Q9H425	C1orf198	Uncharacterized protein C1orf198			O43164	PJA2	E3 ubiquitin-protein ligase Praja-2
Q7Z5L9	IRF2BP2	Interferon regulatory factor 2-binding protein 2			Q7Z4N8	P4HA3	Isoform 3 of Prolyl 4-hydroxylase subunit alpha-3
Q13542	EIF4EBP2	Eukaryotic translation initiation factor 4E-binding protein 2			O75976	CPD	Carboxypeptidase D
O43299	AP5Z1	AP-5 complex subunit zeta-1			P48443	RXRG	Retinoic acid receptor RXR-gamma
Q9Y6R9	CCDC61	Coiled-coil domain-containing protein 61			Q9NYA4	MTMR4	Myotubularin-related protein 4
Q9UNA4	POLI	DNA polymerase iota			Q7Z5L9	IRF2BP2	Interferon regulatory factor 2-binding protein 2
Q9Y546	LRRC42	Leucine-rich repeat-containing protein 42			P19021	PAM	Isoform 5 of Peptidyl-glycine alpha-amidating monooxygenase
Q9Y4F3	KIAA0430	Meiosis arrest female protein 1			Q8NFZ5	TNIP2	TNFAIP3-interacting protein 2
P48443	RXRG	Retinoic acid receptor RXR-gamma			P12107	COL11A1	Collagen alpha-1(XI) chain
Q9P2F8	SIPA1L2	Signal-induced proliferation-associated 1-like protein 2			Q86Y13	DZIP3	E3 ubiquitin-protein ligase DZIP3
Q14938	NFIX	Isoform 3 of Nuclear factor 1 X-type			P37268	FDFT1	Squalene synthase
Q99622	C12orf57	Protein C10			Q96F45	ZNF503	Zinc finger protein 503
P23458	JAK1	Tyrosine-protein kinase JAK1			O00311	CDC7	Cell division cycle 7-related protein kinase
Q9BUE6	ISCA1	Isoform 2 of Iron-sulfur cluster assembly 1 homolog, mitochondrial			O60337	MARCHF6	E3 ubiquitin-protein ligase MARCH6
O94900	TOX	Thymocyte selection-associated high mobility group box protein TOX			P24928	POLR2A	DNA-directed RNA polymerase II subunit RPB1
Q6UX15	LAYN	Layilin			Q6ZWL3	CYP4V2	Cytochrome P450 4V2
Q9BPZ3	PAIP2	Polyadenylate-binding protein-interacting protein 2			P16035	TIMP2	Metalloproteinase inhibitor 2
Q9Y2S0	POLR1D	Isoform 2 of DNA-directed RNA polymerases I and III subunit RPAC2			P14373	TRIM27	Zinc finger protein RFP
Q15013	MAD2L1BP	Isoform 2 of MAD2L1-binding protein			Q7Z2W4	ZC3HAV1	Zinc finger CCCH-type antiviral protein 1
O14874	BCKDK	[3-methyl-2-oxobutanoate dehydrogenase [lipoamide]] kinase, mitochondrial			Q14061	COX17	Cytochrome c oxidase copper chaperone
P0DI83	RAB34	Ras-related protein Rab-34, isoform NARR			Q6UXM1	LRIG3	Leucine-rich repeats and immunoglobulin-like domains protein 3
Q8N2K1	UBE2J2	Isoform 3 of Ubiquitin-conjugating enzyme E2 J2			P08253	MMP2	72 kDa type IV collagenase
Q9UI14	RABAC1	Prenylated Rab acceptor protein 1			Q9BY12	SCAPER	S phase cyclin A-associated protein in the endoplasmic reticulum
O43715	TRIAP1	TP53-regulated inhibitor of apoptosis 1			Q13490	BIRC2	Baculoviral IAP repeat-containing protein 2
Q8NFZ5	TNIP2	TNFAIP3-interacting protein 2			P05067	APP	Amyloid beta A4 protein
Q8J025	APCDD1	Protein APCDD1			Q9UKV5	AMFR	E3 ubiquitin-protein ligase AMFR
P50281	MMP14	Matrix metalloproteinase-14			O00767	SCD	Acyl-CoA desaturase
P12109	COL6A1	Collagen alpha-1(VI) chain			Q06481	APLP2	Amyloid-like protein 2
P12110	COL6A2	Collagen alpha-2(VI) chain			O15460	P4HA2	Prolyl 4-hydroxylase subunit alpha-2
Q9H6S1	AZI2	5-azacytidine-induced protein 2			Q8TEY7	USP33	Ubiquitin carboxyl-terminal hydrolase 33
Q14112	NID2	Nidogen-2			Q6UWY0	ARSK	Arylsulfatase K
P37268	FDFT1	Squalene synthase			Q9UPP1	PHF8	Histone lysine demethylase PHF8
P12111	COL6A3	Collagen alpha-3(VI) chain			Q9P0P0	RNF181	E3 ubiquitin-protein ligase RNF181
P58215	LOXL3	Lysyl oxidase homolog 3			P17405	SMPD1	Sphingomyelin phosphodiesterase
Q53EL6	PDCD4	Programmed cell death protein 4			P59923	ZNF445	Zinc finger protein 445
Q9BRK5	SDF4	45 kDa calcium-binding protein			Q9H9D4	ZNF408	Zinc finger protein 408
Q9BWW8	APOL6	Apolipoprotein L6			Q9BUE6	ISCA1	Isoform 2 of Iron-sulfur cluster assembly 1 homolog, mitochondrial
Q14534	SQLE	Squalene monooxygenase			Q9BRK5	SDF4	45 kDa calcium-binding protein
Q6UWY0	ARSK	Arylsulfatase K			Q14393	GAS6	Growth arrest-specific protein 6
Q76M96	CCDC80	Isoform 2 of Coiled-coil domain-containing protein 80			O15015	ZNF646	Isoform 2 of Zinc finger protein 646
P17029	ZKSCAN1	Zinc finger protein with KRAB and SCAN domains 1			Q9NWK9	ZNHIT6	Box C/D snoRNA protein 1
Q9BSF8	BTBD10	Isoform 2 of BTB/POZ domain-containing protein 10			Q6FIF0	ZFAND6	AN1-type zinc finger protein 6
Q9H9D4	ZNF408	Zinc finger protein 408			P02461	COL3A1	Collagen alpha-1(III) chain
Q9UBN4	TRPC4	Isoform Epsilon of Short transient receptor potential channel 4			P05997	COL5A2	Collagen alpha-2(V) chain
P81133	SIM1	Single-minded homolog 1			Q92626	PXDN	Peroxidasin homolog
P49760	CLK2	Dual specificity protein kinase CLK2			P48740	MASP1	Isoform 2 of Mannan-binding lectin serine protease 1
P10589	NR2F1	COUP transcription factor 1			Q14318	FKBP8	Isoform 2 of Peptidyl-prolyl cis-trans isomerase FKBP8
Q8N6Y2	LRRC17	Leucine-rich repeat-containing protein 17			P50281	MMP14	Matrix metalloproteinase-14
Q96BN2	TADA1	Transcriptional adapter 1			Q13822	ENPP2	Isoform 2 of Ectonucleotide pyrophosphatase/phosphodiesterase family member 2
Q8NEY8	PPHLN1	Periphilin-1			P20908	COL5A1	Collagen alpha-1(V) chain
Q16352	INA	Alpha-internexin			P10589	NR2F1	COUP transcription factor 1
Q6ZWL3	CYP4V2	Cytochrome P450 4V2			Q5T6S3	PHF19	PHD finger protein 19
P27701	CD82	CD82 antigen			P35226	BMI1	Polycomb complex protein BMI-1
P48651	PTDSS1	Phosphatidylserine synthase 1			O75592	MYCBP2	E3 ubiquitin-protein ligase MYCBP2
					P13498	CYBA	Cytochrome b-245 light chain
					Q5KU26	COLEC12	Collectin-12
					Q9UNA4	POLI	DNA polymerase iota
					O14773	TPP1	Tripeptidyl-peptidase 1
					Q96AY2	EME1	Isoform 2 of Crossover junction endonuclease EME1
					P02458	COL2A1	Collagen alpha-1(II) chain
					P23458	JAK1	Tyrosine-protein kinase JAK1
					P09486	SPARC	SPARC
					Q9UGL1	KDM5B	Isoform 2 of Lysine-specific demethylase 5B
					Q9UKT4	FBXO5	F-box only protein 5
					Term:	Collagen-like 3, 14 fold enrichment, p=0.021
					Uniprot-I	Gene	Description
					Q5KU26	COLEC12	Collectin-12
					P12107	COL11A1	Collagen alpha-1(XI) chain
					Q99715	COL12A1	Collagen alpha-1(XII) chain
					Q05707	COL14A1	Collagen alpha-1(XIV) chain
					P12111	COL6A3	Collagen alpha-3(VI) chain
					Term:	Protease inhibitor, 5.2 fold enrichment, p=0.022
					Uniprot-I	Gene	Description
					P01033	TIMP1	Metalloproteinase inhibitor 1
					Q06481	APLP2	Amyloid-like protein 2
					P16035	TIMP2	Metalloproteinase inhibitor 2
					O75635	SERPINB7	Serpin B7
					P05121	SERPINE1	Plasminogen activator inhibitor 1
					P05067	APP	Amyloid beta A4 protein
					P12111	COL6A3	Collagen alpha-3(VI) chain
					P01034	CST3	Cystatin-C
					Term:	dsDNA binding, 2.9 fold enrichment, p=0.023
					Uniprot-I	Gene	Description
					P35869	AHR	Aryl hydrocarbon receptor
					O15370	SOX12	Transcription factor SOX-12
					P48443	RXRG	Retinoic acid receptor RXR-gamma
					Q14938	NFIX	Isoform 3 of Nuclear factor 1 X-type
					P14316	IRF2	Interferon regulatory factor 2
					P10589	NR2F1	COUP transcription factor 1
					Q99081	TCF12	Isoform 3 of Transcription factor 12
					P53567	CEBPG	CCAAT/enhancer-binding protein gamma
					P17676	CEBPB	CCAAT/enhancer-binding protein beta
					Q99811	PRRX2	Paired mesoderm homeobox protein 2
					Q9UGL1	KDM5B	Isoform 2 of Lysine-specific demethylase 5B
					O15119	TBX3	T-box transcription factor TBX3
					Q96BA8	CREB3L1	Cyclic AMP-responsive element-binding protein 3-like protein 1
					Q00839	HNRNPU	Heterogeneous nuclear ribonucleoprotein U
					O15525	MAFG	Transcription factor MafG
					Term:	Serine type endopeptidase, 4.8 fold enrichment, p=0.046
					Uniprot-I	Gene	Description
					P00749	PLAU	Urokinase-type plasminogen activator
					P00736	C1R	Complement C1r subcomponent
					P48740	MASP1	Isoform 2 of Mannan-binding lectin serine protease 1
					P50281	MMP14	Matrix metalloproteinase-14
					O14773	TPP1	Tripeptidyl-peptidase 1
					Q86WA8	LONP2	Lon protease homolog 2, peroxisomal
					P08253	MMP2	72 kDa type IV collagenase
					P43235	CTSK	Cathepsin K
					Term:	Nuclear pore complex, 3.5 fold enrichment, p=0.073
					Uniprot-I	Gene	Description
					P37198	NUP62	Nuclear pore glycoprotein p62
					Q9HC62	SENP2	Sentrin-specific protease 2
					Q99567	NUP88	Nuclear pore complex protein Nup88
					Q53GS7	GLE1	Nucleoporin GLE1
					Q7Z3B4	NUP54	Nucleoporin p54
					Q9BVL2	NUP58	Nucleoporin p58/p45
					P35658	NUP214	Isoform 5 of Nuclear pore complex protein Nup214
					O60318	MCM3AP	Germinal-center associated nuclear protein

## Sheet: B - MVA upregulated
66 Proteins upregulated > 2 fold by MVA
Uniprot	Gene Symbol	Description			Significantly enriched clusters and their components from DAVID analysis
P13498	CYBA	Cytochrome b-245 light chain			Term:	Glycoprotein, 3.8 fold enrichment, p=2.4e-10
Q99650	OSMR	Oncostatin-M-specific receptor subunit beta			Uniprot-I	Gene	Description
Q9H7F4	TMEM185B	Transmembrane protein 185B			P02771	AFP	Alpha-fetoprotein
Q15012	LAPTM4A	Lysosomal-associated transmembrane protein 4A			P02671	FGA	Fibrinogen alpha chain
Q56NI9	ESCO2	N-acetyltransferase ESCO2			P00450	CP	Ceruloplasmin
Q99523	SORT1	Sortilin			P56937	HSD17B7	3-keto-steroid reductase
Q5VY43	PEAR1	Platelet endothelial aggregation receptor 1			P35354	PTGS2	Prostaglandin G/H synthase 2
Q93073	SECISBP2L	Selenocysteine insertion sequence-binding protein 2-like			Q9Y625	GPC6	Glypican-6
Q13530	SERINC3	Serine incorporator 3			Q5VY43	PEAR1	Platelet endothelial aggregation receptor 1
Q2PPJ7	RALGAPA2	Ral GTPase-activating protein subunit alpha-2			P19823	ITIH2	Inter-alpha-trypsin inhibitor heavy chain H2
P36021	SLC16A2	Monocarboxylate transporter 8			P0C0L4	C4A	Complement C4-A
Q8IYM9	TRIM22	E3 ubiquitin-protein ligase TRIM22			Q99523	SORT1	Sortilin
Q5VXT5	SYPL2	Synaptophysin-like protein 2			P02749	APOH	Beta-2-glycoprotein 1
Q9Y2B1	TMEM5	Transmembrane protein 5			P02649	APOE	Apolipoprotein E
P56937	HSD17B7	3-keto-steroid reductase			P02788	LTF	Lactotransferrin
P20742	PZP	Pregnancy zone protein			P02787	TF	Serotransferrin
P0C0L4	C4A	Complement C4-A			P69905	HBA1	Hemoglobin subunit alpha
P01023	A2M	Alpha-2-macroglobulin			Q9C0C4	SEMA4C	Semaphorin-4C
Q8TCG5	CPT1C	Carnitine O-palmitoyltransferase 1, brain isoform			P35443	THBS4	Thrombospondin-4
P28562	DUSP1	Dual specificity protein phosphatase 1			Q5VXT5	SYPL2	Synaptophysin-like protein 2
Q9BUN8	DERL1	Derlin-1			P36955	SERPINF1	Pigment epithelium-derived factor
Q9C0C4	SEMA4C	Semaphorin-4C			O75084	FZD7	Frizzled-7
P35354	PTGS2	Prostaglandin G/H synthase 2			Q68DH5	LMBRD2	LMBR1 domain-containing protein 2
P35712	SOX6	Transcription factor SOX-6			Q99650	OSMR	Oncostatin-M-specific receptor subunit beta
P22736	NR4A1	Isoform 2 of Nuclear receptor subfamily 4 group A member 1			Q13530	SERINC3	Serine incorporator 3
O75084	FZD7	Frizzled-7			P02774	GC	Isoform 3 of Vitamin D-binding protein
Q6ZS30	NBEAL1	Neurobeachin-like protein 1			P20742	PZP	Pregnancy zone protein
P69905	HBA1	Hemoglobin subunit alpha			O43292	GPAA1	Glycosylphosphatidylinositol anchor attachment 1 protein
P02649	APOE	Apolipoprotein E			P08697	SERPINF2	Alpha-2-antiplasmin
Q8N157	AHI1	Jouberin			P01023	A2M	Alpha-2-macroglobulin
Q8TB61	SLC35B2	Adenosine 3'-phospho 5'-phosphosulfate transporter 1			P05543	SERPINA7	Thyroxine-binding globulin
Q96DT5	DNAH11	Dynein heavy chain 11, axonemal
Q674X7	KAZN	Kazrin			Term:	Serine-type endopeptidase inhibitor activity, 22.8 fold enrichment, p=9.2e-4
P08697	SERPINF2	Alpha-2-antiplasmin			Uniprot-I	Gene	Description
P02787	TF	Serotransferrin			P19823	ITIH2	Inter-alpha-trypsin inhibitor heavy chain H2
P02774	GC	Isoform 3 of Vitamin D-binding protein			P20742	PZP	Pregnancy zone protein
P09913	IFIT2	Interferon-induced protein with tetratricopeptide repeats 2			P36955	SERPINF1	Pigment epithelium-derived factor
P02100	HBE1	Hemoglobin subunit epsilon			P08697	SERPINF2	Alpha-2-antiplasmin
Q96M86	DNHD1	Dynein heavy chain domain-containing protein 1			P01023	A2M	Alpha-2-macroglobulin
P36955	SERPINF1	Pigment epithelium-derived factor			P05543	SERPINA7	Thyroxine-binding globulin
P35443	THBS4	Thrombospondin-4
Q8TCB0	IFI44	Interferon-induced protein 44			Term:	Heme, 20.0 fold enrichment, p=0.001
Q9Y6W6	DUSP10	Dual specificity protein phosphatase 10			Uniprot-I	Gene	Description
P02749	APOH	Beta-2-glycoprotein 1			P02100	HBE1	Hemoglobin subunit epsilon
Q12802	AKAP13	Isoform 2 of A-kinase anchor protein 13			P02100	HBE1	Hemoglobin subunit epsilon
Q15646	OASL	2'-5'-oligoadenylate synthase-like protein			P35354	PTGS2	Prostaglandin G/H synthase 2
P05543	SERPINA7	Thyroxine-binding globulin			P69905	HBA1	Hemoglobin subunit alpha
Q9HC78	ZBTB20	Zinc finger and BTB domain-containing protein 20			P13498	CYBA	Cytochrome b-245 light chain
P19823	ITIH2	Inter-alpha-trypsin inhibitor heavy chain H2
Q68DH5	LMBRD2	LMBR1 domain-containing protein 2			Term:	Alpha-2-macroglobulin, 66.0 fold enrichment, p=0.015
O43292	GPAA1	Glycosylphosphatidylinositol anchor attachment 1 protein			Uniprot-I	Gene	Description
P46199	MTIF2	Translation initiation factor IF-2, mitochondrial			P0C0L4	C4A	Complement C4-A
P20591	MX1	Interferon-induced GTP-binding protein Mx1			P0C0L4	C4A	Complement C4-A
Q96AZ6	ISG20	Interferon-stimulated gene 20 kDa protein			P20742	PZP	Pregnancy zone protein
Q9UII4	HERC5	E3 ISG15--protein ligase HERC5			P01023	A2M	Alpha-2-macroglobulin
P02771	AFP	Alpha-fetoprotein
P00450	CP	Ceruloplasmin			Term:	Negative regulation of endopeptidase activity, 16.7 fold enrichment, p=0.0016
P02671	FGA	Fibrinogen alpha chain			Uniprot-I	Gene	Description
P02788	LTF	Lactotransferrin			P19823	ITIH2	Inter-alpha-trypsin inhibitor heavy chain H2
Q96PX6	CCDC85A	Coiled-coil domain-containing protein 85A			P0C0L4	C4A	Complement C4-A
O00192	ARVCF	Armadillo repeat protein deleted in velo-cardio-facial syndrome			P20742	PZP	Pregnancy zone protein
Q9BYH8	NFKBIZ	NF-kappa-B inhibitor zeta			P36955	SERPINF1	Pigment epithelium-derived factor
Q96S97	MYADM	Myeloid-associated differentiation marker			P08697	SERPINF2	Alpha-2-antiplasmin
Q9Y625	GPC6	Glypican-6			P01023	A2M	Alpha-2-macroglobulin
Q9UI95	MAD2L2	Mitotic spindle assembly checkpoint protein MAD2B			P05543	SERPINA7	Thyroxine-binding globulin
Q8IYY4	DZIP1L	Zinc finger protein DZIP1L
					Term:	Innate immune response, 6.5 fold enrichment, p=0.0016
					Uniprot-I	Gene	Description
					P09913	IFIT2	Interferon-induced protein with tetratricopeptide repeats 2
					Q15646	OASL	2'-5'-oligoadenylate synthase-like protein
					P02671	FGA	Fibrinogen alpha chain
					P0C0L4	C4A	Complement C4-A
					Q8IYM9	TRIM22	E3 ubiquitin-protein ligase TRIM22
					Q9UII4	HERC5	E3 ISG15--protein ligase HERC5
					P20591	MX1	Interferon-induced GTP-binding protein Mx1
					Q96AZ6	ISG20	Interferon-stimulated gene 20 kDa protein
					P02788	LTF	Lactotransferrin
					Q13530	SERINC3	Serine incorporator 3
					P13498	CYBA	Cytochrome b-245 light chain
					Term:	O-linked (GalNAc...) serine, 39.4 fold enrichment, p=0.015
					Uniprot-I	Gene	Description
					P19823	ITIH2	Inter-alpha-trypsin inhibitor heavy chain H2
					P19823	ITIH2	Inter-alpha-trypsin inhibitor heavy chain H2
					P02671	FGA	Fibrinogen alpha chain
					P02649	APOE	Apolipoprotein E
					P02787	TF	Serotransferrin
					Term:	Cellular oxidant detoxification, 13.1 fold enrichment, p=0.056
					Uniprot-I	Gene	Description
					P02100	HBE1	Hemoglobin subunit epsilon
					P02649	APOE	Apolipoprotein E
					P35354	PTGS2	Prostaglandin G/H synthase 2
					P69905	HBA1	Hemoglobin subunit alpha

## Sheet: C - MVA, AraC, HI downregulated
61 Proteins downregulated > 2 fold by MVA, MVA-AraC and MVA-HI
Uniprot	Gene Symbol	Description			Significantly enriched clusters and their components from DAVID analysis
Q96E35	ZMYND19	Zinc finger MYND domain-containing protein 19			Term:	Extracellular matrix structural constituent, 22.5 fold enrichment, p=4.0e-8
Q9BSJ6	FAM64A	Protein FAM64A			Uniprot-I	Gene	Description
Q9UKT4	FBXO5	F-box only protein 5			P02452	COL1A1	Collagen alpha-1(I) chain
P35556	FBN2	Fibrillin-2			P24043	LAMA2	Laminin subunit alpha-2
Q99640	PKMYT1	Membrane-associated tyrosine- and threonine-specific cdc2-inhibitory kinase			P02461	COL3A1	Collagen alpha-1(III) chain
A8MTZ0	BBIP1	BBSome-interacting protein 1			P05997	COL5A2	Collagen alpha-2(V) chain
Q9NZL6	RGL1	Isoform B of Ral guanine nucleotide dissociation stimulator-like 1			P08123	COL1A2	Collagen alpha-2(I) chain
P35544	FAU	Ubiquitin-like protein FUBI			P02458	COL2A1	Collagen alpha-1(II) chain
Q8ND90	PNMA1	Paraneoplastic antigen Ma1			P09486	SPARC	SPARC
O43164	PJA2	E3 ubiquitin-protein ligase Praja-2			P51884	LUM	Lumican
P19021	PAM	Isoform 5 of Peptidyl-glycine alpha-amidating monooxygenase			Q15113	PCOLCE	Procollagen C-endopeptidase enhancer 1
Q8TEL6	TRPC4AP	Short transient receptor potential channel 4-associated protein			P35556	FBN2	Fibrillin-2
Q9NPA3	MID1IP1	Mid1-interacting protein 1
Q15113	PCOLCE	Procollagen C-endopeptidase enhancer 1			Term:	Collagen fibril organizationt, 23.3 fold enrichment, p=1.7e-4
Q9BT92	TCHP	Trichoplein keratin filament-binding protein			Uniprot-I	Gene	Description
P09486	SPARC	SPARC			P02452	COL1A1	Collagen alpha-1(I) chain
Q9Y5V3	MAGED1	Isoform 2 of Melanoma-associated antigen D1			P02461	COL3A1	Collagen alpha-1(III) chain
P02452	COL1A1	Collagen alpha-1(I) chain			P05997	COL5A2	Collagen alpha-2(V) chain
Q86Y13	DZIP3	E3 ubiquitin-protein ligase DZIP3			P08123	COL1A2	Collagen alpha-2(I) chain
Q9H3L0	MMADHC	Methylmalonic aciduria and homocystinuria type D protein, mitochondrial			P02458	COL2A1	Collagen alpha-1(II) chain
O00767	SCD	Acyl-CoA desaturase			Q99715	COL12A1	Collagen alpha-1(XII) chain
Q9UI42	CPA4	Carboxypeptidase A4			P51884	LUM	Lumican
P01034	CST3	Cystatin-C
Q14106	TOB2	Protein Tob2			Term:	Metal binding, 1.6 fold enrichment, p=0.004
O14746	TERT	Telomerase reverse transcriptase			Uniprot-I	Gene	Description
P48740	MASP1	Isoform 2 of Mannan-binding lectin serine protease 1			O00767	SCD	Acyl-CoA desaturase
Q13127	REST	RE1-silencing transcription factor			P02452	COL1A1	Collagen alpha-1(I) chain
O95864	FADS2	Fatty acid desaturase 2			Q13127	REST	RE1-silencing transcription factor
O15370	SOX12	Transcription factor SOX-12			P02461	COL3A1	Collagen alpha-1(III) chain
P08123	COL1A2	Collagen alpha-2(I) chain			O43164	PJA2	E3 ubiquitin-protein ligase Praja-2
P35869	AHR	Aryl hydrocarbon receptor			P05997	COL5A2	Collagen alpha-2(V) chain
P24043	LAMA2	Laminin subunit alpha-2			P48740	MASP1	Isoform 2 of Mannan-binding lectin serine protease 1
P51884	LUM	Lumican			P48443	RXRG	Retinoic acid receptor RXR-gamma
Q96BY9	SARAF	Store-operated calcium entry-associated regulatory factor			P19021	PAM	Isoform 5 of Peptidyl-glycine alpha-amidating monooxygenase
Q7Z7L7	ZER1	Protein zer-1 homolog			Q86Y13	DZIP3	E3 ubiquitin-protein ligase DZIP3
P35226	BMI1	Polycomb complex protein BMI-1			Q96E35	ZMYND19	Zinc finger MYND domain-containing protein 19
P05997	COL5A2	Collagen alpha-2(V) chain			P17029	ZKSCAN1	Zinc finger protein with KRAB and SCAN domains 1
P02458	COL2A1	Collagen alpha-1(II) chain			P35226	BMI1	Polycomb complex protein BMI-1
Q8N3C7	CLIP4	CAP-Gly domain-containing linker protein 4			P59923	ZNF445	Zinc finger protein 445
Q9Y6X2	PIAS3	E3 SUMO-protein ligase PIAS3			Q5KU26	COLEC12	Collectin-12
Q99715	COL12A1	Collagen alpha-1(XII) chain			Q99640	PKMYT1	Membrane-associated tyrosine- and threonine-specific cdc2-inhibitory kinase
P02461	COL3A1	Collagen alpha-1(III) chain			P08123	COL1A2	Collagen alpha-2(I) chain
Q99081	TCF12	Isoform 3 of Transcription factor 12			Q9UI42	CPA4	Carboxypeptidase A4
Q5JVL4	EFHC1	EF-hand domain-containing protein 1			P02458	COL2A1	Collagen alpha-1(II) chain
Q92896	GLG1	Isoform 2 of Golgi apparatus protein 1			Q9Y6X2	PIAS3	E3 SUMO-protein ligase PIAS3
P59923	ZNF445	Zinc finger protein 445			P09486	SPARC	SPARC
O95965	ITGBL1	Integrin beta-like protein 1			Q9UKT4	FBXO5	F-box only protein 5
Q9UBU8	MORF4L1	Mortality factor 4-like protein 1			O14746	TERT	Telomerase reverse transcriptase
Q92685	ALG3	Dol-P-Man:Man(5)GlcNAc(2)-PP-Dol alpha-1,3-mannosyltransferase
Q9BX70	BTBD2	BTB/POZ domain-containing protein 2			Term:	RNA polymerase II core promoter proximal region sequence-specific DNA binding, 4.5 fold enrichment, p=0.053
Q96NM4	TOX2	Isoform 2 of TOX high mobility group box family member 2			Uniprot-I	Gene	Description
O00762	UBE2C	Ubiquitin-conjugating enzyme E2 C			Q13127	REST	RE1-silencing transcription factor
Q5KU26	COLEC12	Collectin-12			Q99811	PRRX2	Paired mesoderm homeobox protein 2
P30307	CDC25C	M-phase inducer phosphatase 3			O15370	SOX12	Transcription factor SOX-12
Q5T7W7	TSTD2	Thiosulfate sulfurtransferase/rhodanese-like domain-containing protein 2			P48443	RXRG	Retinoic acid receptor RXR-gamma
Q99811	PRRX2	Paired mesoderm homeobox protein 2			P17029	ZKSCAN1	Zinc finger protein with KRAB and SCAN domains 1
P48443	RXRG	Retinoic acid receptor RXR-gamma			Q99081	TCF12	Isoform 3 of Transcription factor 12
O94900	TOX	Thymocyte selection-associated high mobility group box protein TOX			P35226	BMI1	Polycomb complex protein BMI-1
P17029	ZKSCAN1	Zinc finger protein with KRAB and SCAN domains 1			P59923	ZNF445	Zinc finger protein 445
Q16352	INA	Alpha-internexin
P27701	CD82	CD82 antigen

## Sheet: D - MVA down, AraC_HI unchanged
26 Proteins downregulated > 2 fold by MVA but downregulated <1.25 fold by MVA-AraC and MVA-HI
Uniprot	Gene Symbol	Description			Significantly enriched clusters and their components from DAVID analysis
Q00839	HNRNPU	Heterogeneous nuclear ribonucleoprotein U			Term:	Nuclear pore complex, 42.2 fold enrichment, p=1.18E-07
Q9BVL2	NUP58	Nucleoporin p58/p45			Uniprot-I	Gene	Description
Q7Z3B4	NUP54	Nucleoporin p54			P37198	NUP62	Nuclear pore glycoprotein p62
P37198	NUP62	Nuclear pore glycoprotein p62			Q99567	NUP88	Nuclear pore complex protein Nup88
O75592	MYCBP2	E3 ubiquitin-protein ligase MYCBP2			Q53GS7	GLE1	Nucleoporin GLE1
O95478	NSA2	Ribosome biogenesis protein NSA2 homolog			Q7Z3B4	NUP54	Nucleoporin p54
O60318	MCM3AP	Germinal-center associated nuclear protein			Q9BVL2	NUP58	Nucleoporin p58/p45
Q9H8M1	COQ10B	Coenzyme Q-binding protein COQ10 homolog B, mitochondrial			P35658	NUP214	Isoform 5 of Nuclear pore complex protein Nup214
Q6DKI1	RPL7L1	60S ribosomal protein L7-like 1			O60318	MCM3AP	Germinal-center associated nuclear protein
Q8NFW8	CMAS	N-acylneuraminate cytidylyltransferase
P54274	TERF1	Telomeric repeat-binding factor 1
Q99567	NUP88	Nuclear pore complex protein Nup88
O75319	DUSP11	RNA/RNP complex-1-interacting phosphatase
Q9Y2J4	AMOTL2	Isoform 4 of Angiomotin-like protein 2
Q9NW13	RBM28	RNA-binding protein 28
O15525	MAFG	Transcription factor MafG
Q53GS7	GLE1	Nucleoporin GLE1
O75683	SURF6	Surfeit locus protein 6
P35658	NUP214	Isoform 5 of Nuclear pore complex protein Nup214
Q6P4F7	ARHGAP11A	Rho GTPase-activating protein 11A
Q7Z2W4	ZC3HAV1	Zinc finger CCCH-type antiviral protein 1
P17676	CEBPB	CCAAT/enhancer-binding protein beta
O94898	LRIG2	Leucine-rich repeats and immunoglobulin-like domains protein 2
Q9NNX1	TUFT1	Tuftelin
Q15013	MAD2L1BP	Isoform 2 of MAD2L1-binding protein
Q96BN2	TADA1	Transcriptional adapter 1

## Sheet: E - MVA, AraC down,HI unchanged
37 Proteins downregulated > 2 fold by MVA and MVA-AraC but <1.25 fold by MVA-HI
Uniprot	Gene Symbol	Description			Significantly enriched clusters and their components from DAVID analysis
Q13490	BIRC2	Baculoviral IAP repeat-containing protein 2			Term:	Secreted, 7.2 fold enrichment, p=4.25E-06
Q9NZJ5	EIF2AK3	Eukaryotic translation initiation factor 2-alpha kinase 3			Uniprot-I	Gene	Description
Q9NQX5	NPDC1	Neural proliferation differentiation and control protein 1			O75094	SLIT3	Isoform 4 of Slit homolog 3 protein
Q495W5	FUT11	Alpha-(1,3)-fucosyltransferase 11			Q9UKU9	ANGPTL2	Angiopoietin-related protein 2
Q9BW61	DDA1	DET1- and DDB1-associated protein 1			P00749	PLAU	Urokinase-type plasminogen activator
Q15653	NFKBIB	NF-kappa-B inhibitor beta			P16035	TIMP2	Metalloproteinase inhibitor 2
P00749	PLAU	Urokinase-type plasminogen activator			P12110	COL6A2	Collagen alpha-2(VI) chain
P01137	TGFB1	Transforming growth factor beta-1			Q08380	LGALS3BP	Galectin-3-binding protein
Q7Z4F1	LRP10	Low-density lipoprotein receptor-related protein 10			O00391	QSOX1	Sulfhydryl oxidase 1
Q8NEZ5	FBXO22	F-box only protein 22			O94964	SOGA1	Isoform 2 of Protein SOGA1
P50616	TOB1	Protein Tob1			P01137	TGFB1	Transforming growth factor beta-1
O00391	QSOX1	Sulfhydryl oxidase 1			P05121	SERPINE1	Plasminogen activator inhibitor 1
Q9GZM8	NDEL1	Isoform 3 of Nuclear distribution protein nudE-like 1			P43235	CTSK	Cathepsin K
Q5JPI3	C3orf38	Uncharacterized protein C3orf38			P10909	CLU	Isoform 2 of Clusterin
P12757	SKIL	Ski-like protein
P10909	CLU	Isoform 2 of Clusterin			Term:	Zymogen, 13.8 fold enrichment, p=0.0108
O15119	TBX3	T-box transcription factor TBX3			Uniprot-I	Gene	Description
Q96S38	RPS6KC1	Ribosomal protein S6 kinase delta-1			P00749	PLAU	Urokinase-type plasminogen activator
P12110	COL6A2	Collagen alpha-2(VI) chain			P42575	CASP2	Caspase-2
Q06481	APLP2	Amyloid-like protein 2			P43235	CTSK	Cathepsin K
P05121	SERPINE1	Plasminogen activator inhibitor 1			Q99538	LGMN	Legumain
Q9UKU9	ANGPTL2	Angiopoietin-related protein 2
O94964	SOGA1	Isoform 2 of Protein SOGA1
Q99538	LGMN	Legumain
Q96EK4	THAP11	THAP domain-containing protein 11
Q86U06	RBM23	Isoform 2 of Probable RNA-binding protein 23
Q9NQX7	ITM2C	Integral membrane protein 2C
P16035	TIMP2	Metalloproteinase inhibitor 2
O75094	SLIT3	Isoform 4 of Slit homolog 3 protein
P43235	CTSK	Cathepsin K
P11802	CDK4	Cyclin-dependent kinase 4
Q8IZL2	MAML2	Mastermind-like protein 2
Q5VZ89	DENND4C	DENN domain-containing protein 4C
O95613	PCNT	Pericentrin
Q08380	LGALS3BP	Galectin-3-binding protein
P42575	CASP2	Caspase-2
Q9BPZ3	PAIP2	Polyadenylate-binding protein-interacting protein 2

## Sheet: F - MVA down HI up
57 Proteins upregulated > 2 fold by MVA-HI but upregulated <1.25 fold by MVA
Uniprot	Gene Symbol	Description			Significantly enriched clusters and their components from DAVID analysis
O15079	SNPH	Isoform 2 of Syntaphilin			Term:	Immunity, 7.6 fold enrichment, p=9.94E-07
O75762	TRPA1	Transient receptor potential cation channel subfamily A member 1			Uniprot-I	Gene	Description
Q7Z2W4	ZC3HAV1	Zinc finger CCCH-type antiviral protein 1			Q16666	IFI16	Gamma-interferon-inducible protein 16
P50616	TOB1	Protein Tob1			Q12899	TRIM26	Tripartite motif-containing protein 26
Q9UKU9	ANGPTL2	Angiopoietin-related protein 2			Q8IY21	DDX60	Probable ATP-dependent RNA helicase DDX60
Q8WTP8	AEN	Isoform 2 of Apoptosis-enhancing nuclease			P13747	HLA-E	HLA class I histocompatibility antigen, alpha chain E
P13747	HLA-E	HLA class I histocompatibility antigen, alpha chain E			Q5TEJ8	THEMIS2	Protein THEMIS2
P17676	CEBPB	CCAAT/enhancer-binding protein beta			Q460N5	PARP14	Poly [ADP-ribose] polymerase 14
Q9BWW8	APOL6	Apolipoprotein L6			Q9Y6K5	OAS3	2'-5'-oligoadenylate synthase 3
P47974	ZFP36L2	mRNA decay activator protein ZFP36L2			P29590	PML	Protein PML
P61587	RND3	Rho-related GTP-binding protein RhoE			P32455	GBP1	Guanylate-binding protein 1
Q9BUP0	EFHD1	EF-hand domain-containing protein D1			P32456	GBP2	Guanylate-binding protein 2
Q9P2E3	ZNFX1	NFX1-type zinc finger-containing protein 1			Q7Z2W4	ZC3HAV1	Zinc finger CCCH-type antiviral protein 1
Q460N5	PARP14	Poly [ADP-ribose] polymerase 14			Q9P2E3	ZNFX1	NFX1-type zinc finger-containing protein 1
Q00978	IRF9	Interferon regulatory factor 9			Q8TDB6	DTX3L	E3 ubiquitin-protein ligase DTX3L
Q96IP4	FAM46A	Isoform 2 of Protein FAM46A
Q9HB58	SP110	Isoform 6 of Sp110 nuclear body protein			Term:	PARP, 51.9 fold enrichment, p=0.00068
Q8WUJ3	CEMIP	Cell migration-inducing and hyaluronan-binding protein			Uniprot-I	Gene	Description
P30504	HLA-C	HLA class I histocompatibility antigen, Cw-4 alpha chain			Q9H0J9	PARP12	Poly [ADP-ribose] polymerase 12
O95084	PRSS23	Serine protease 23			Q7Z2W4	ZC3HAV1	Zinc finger CCCH-type antiviral protein 1
P41162	ETV3	ETS translocation variant 3			Q53GL7	PARP10	Poly [ADP-ribose] polymerase 10
Q9H0J9	PARP12	Poly [ADP-ribose] polymerase 12			Q460N5	PARP14	Poly [ADP-ribose] polymerase 14
Q8IVG5	SAMD9L	Sterile alpha motif domain-containing protein 9-like
Q8TDB6	DTX3L	E3 ubiquitin-protein ligase DTX3L
Q9NX57	RAB20	Ras-related protein Rab-20
O14933	UBE2L6	Ubiquitin/ISG15-conjugating enzyme E2 L6
P55040	GEM	GTP-binding protein GEM
Q16666	IFI16	Gamma-interferon-inducible protein 16
Q9H8V3	ECT2	Isoform 3 of Protein ECT2
O75146	HIP1R	Huntingtin-interacting protein 1-related protein
P32455	GBP1	Guanylate-binding protein 1
Q9ULX9	MAFF	Transcription factor MafF
P36959	GMPR	GMP reductase 1
P09038	FGF2	Fibroblast growth factor 2
Q12899	TRIM26	Tripartite motif-containing protein 26
P28676	GCA	Grancalcin
P32456	GBP2	Guanylate-binding protein 2
Q7Z2W4	ZC3HAV1	Zinc finger CCCH-type antiviral protein 1
Q53GL7	PARP10	Poly [ADP-ribose] polymerase 10
Q96S99	PLEKHF1	Pleckstrin homology domain-containing family F member 1
Q9Y2V7	COG6	Conserved oligomeric Golgi complex subunit 6
P23381	WARS	Tryptophan--tRNA ligase, cytoplasmic
Q9BYK8	HELZ2	Helicase with zinc finger domain 2
Q8IWB1	ITPRIP	Inositol 1,4,5-trisphosphate receptor-interacting protein
Q5K651	SAMD9	Sterile alpha motif domain-containing protein 9
O60237	PPP1R12B	Protein phosphatase 1 regulatory subunit 12B
Q9Y6K5	OAS3	2'-5'-oligoadenylate synthase 3
Q9UMW8	USP18	Ubl carboxyl-terminal hydrolase 18
P55042	RRAD	GTP-binding protein RAD
P24592	IGFBP6	Insulin-like growth factor-binding protein 6
Q9BQE5	APOL2	Apolipoprotein L2
Q5JWR5	DOPEY1	Protein dopey-1
P29590	PML	Protein PML
O95025	SEMA3D	Semaphorin-3D
Q8IY21	DDX60	Probable ATP-dependent RNA helicase DDX60
P04179	SOD2	Superoxide dismutase [Mn], mitochondrial
Q5TEJ8	THEMIS2	Protein THEMIS2

## Sheet: G - AraC or HI up >> MVA
34 Proteins upregulated >10 fold more by MVA-HI or MVA-AraC compared to MVA
Uniprot	Gene Symbol	Description			Significantly enriched clusters and their components from DAVID analysis
Q99741	CDC6	Cell division control protein 6 homolog			Term:	Antiviral defence, 32.8 fold enrichment, p=3.3e-16
Q9UKU9	ANGPTL2	Angiopoietin-related protein 2			Uniprot-I	Gene	Description
Q9BWW8	APOL6	Apolipoprotein L6			Q9BYX4	IFIH1	Interferon-induced helicase C domain-containing protein 1
P00736	C1R	Complement C1r subcomponent			P09913	IFIT2	Interferon-induced protein with tetratricopeptide repeats 2
P35544	FAU	Ubiquitin-like protein FUBI			Q15646	OASL	2'-5'-oligoadenylate synthase-like protein
Q0D2I5	IFFO1	Isoform 5 of Intermediate filament family orphan 1			O95786	DDX58	Probable ATP-dependent RNA helicase DDX58
P25963	NFKBIA	NF-kappa-B inhibitor alpha			P09914	IFIT1	Interferon-induced protein with tetratricopeptide repeats 1
Q8ND90	PNMA1	Paraneoplastic antigen Ma1			Q9UII4	HERC5	E3 ISG15--protein ligase HERC5
O15079	SNPH	Isoform 2 of Syntaphilin			P20591	MX1	Interferon-induced GTP-binding protein Mx1
P50616	TOB1	Protein Tob1			O14879	IFIT3	Interferon-induced protein with tetratricopeptide repeats 3
O75762	TRPA1	Transient receptor potential cation channel subfamily A member 1			Q7Z2W4	ZC3HAV1	Zinc finger CCCH-type antiviral protein 1
Q7Z2W4	ZC3HAV1	Zinc finger CCCH-type antiviral protein 1			P05161	ISG15	Ubiquitin-like protein ISG15
Q96F45	ZNF503	Zinc finger protein 503			P29728	OAS2	2'-5'-oligoadenylate synthase 2
O95786	DDX58	Probable ATP-dependent RNA helicase DDX58			Q96AZ6	ISG20	Interferon-stimulated gene 20 kDa protein
Q9UBS3	DNAJB9	DnaJ homolog subfamily B member 9			P20592	MX2	Interferon-induced GTP-binding protein Mx2
Q13115	DUSP4	Dual specificity protein phosphatase 4			P00973	OAS1	Isoform p48 of 2'-5'-oligoadenylate synthase 1
Q9UII4	HERC5	E3 ISG15--protein ligase HERC5
Q8IVU3	HERC6	Probable E3 ubiquitin-protein ligase HERC6			Term:	Interleukin-27-mediated signaling pathway, 141.9 fold enrichment, p=9.6e-5
Q9BYX4	IFIH1	Interferon-induced helicase C domain-containing protein 1			Uniprot-I	Gene	Description
P09914	IFIT1	Interferon-induced protein with tetratricopeptide repeats 1			Q15646	OASL	2'-5'-oligoadenylate synthase-like protein
P09913	IFIT2	Interferon-induced protein with tetratricopeptide repeats 2			P20591	MX1	Interferon-induced GTP-binding protein Mx1
O14879	IFIT3	Interferon-induced protein with tetratricopeptide repeats 3			P29728	OAS2	2'-5'-oligoadenylate synthase 2
P05231	IL6	Interleukin-6			P00973	OAS1	Isoform p48 of 2'-5'-oligoadenylate synthase 1
P05161	ISG15	Ubiquitin-like protein ISG15
Q96AZ6	ISG20	Interferon-stimulated gene 20 kDa protein			Term:	Coronavirus disease - COVID-19, 13.2 fold enrichment, p=5.9e-7
P20591	MX1	Interferon-induced GTP-binding protein Mx1			Uniprot-I	Gene	Description
P20592	MX2	Interferon-induced GTP-binding protein Mx2			Q9BYX4	IFIH1	Interferon-induced helicase C domain-containing protein 1
P22736	NR4A1	Isoform 2 of Nuclear receptor subfamily 4 group A member 1			O95786	DDX58	Probable ATP-dependent RNA helicase DDX58
P00973	OAS1	Isoform p48 of 2'-5'-oligoadenylate synthase 1			P00736	C1R	Complement C1r subcomponent
P29728	OAS2	2'-5'-oligoadenylate synthase 2			P20591	MX1	Interferon-induced GTP-binding protein Mx1
Q15646	OASL	2'-5'-oligoadenylate synthase-like protein			P05161	ISG15	Ubiquitin-like protein ISG15
P35354	PTGS2	Prostaglandin G/H synthase 2			P29728	OAS2	2'-5'-oligoadenylate synthase 2
Q5TEJ8	THEMIS2	Protein THEMIS2			P20592	MX2	Interferon-induced GTP-binding protein Mx2
Q9UMW8	USP18	Ubl carboxyl-terminal hydrolase 18			P05231	IL6	Interleukin-6
					P00973	OAS1	Isoform p48 of 2'-5'-oligoadenylate synthase 1
					P25963	NFKBIA	NF-kappa-B inhibitor alpha
					Term:	Cellular response to exogenous dsRNA, 42.6 fold enrichment, p=0.053
					Uniprot-I	Gene	Description
					Q9BYX4	IFIH1	Interferon-induced helicase C domain-containing protein 1
					O95786	DDX58	Probable ATP-dependent RNA helicase DDX58
					P09914	IFIT1	Interferon-induced protein with tetratricopeptide repeats 1
