# Supplementary material for: Quantitative temporal analysis of modified vaccinia Ankara, the monkeypox and smallpox vaccine
Source: Research Square preprint supplement (doi:10.21203/rs.3.rs-1850393/v1), 2022-07-13
Supplement: Supplementary file 3 [file 7d06c23f39602f55430ad6ec.xlsx]

## Sheet: A - MVA and VACV both down
113 Proteins downregulated > 2 fold by both MVA and virulent VACV
Uniprot	Gene Symbol	Description			Significantly enriched clusters and their components from DAVID analysis
P13498	CYBA	Cytochrome b-245 light chain			Term:	Secreted, 8.7 fold enrichment, p=1.95e-25
P35544	FAU	Ubiquitin-like protein FUBI			Uniprot-I	Gene	Description
Q8ND90	PNMA1	Paraneoplastic antigen Ma1			P02452	COL1A1	Collagen alpha-1(I) chain
O43164	PJA2	E3 ubiquitin-protein ligase Praja-2			Q12841	FSTL1	Follistatin-related protein 1
Q0D2I5	IFFO1	Isoform 5 of Intermediate filament family orphan 1			P55268	LAMB2	Laminin subunit beta-2
Q8TEL6	TRPC4AP	Short transient receptor potential channel 4-associated protein			Q9Y287	ITM2B	Integral membrane protein 2B
Q9NPA3	MID1IP1	Mid1-interacting protein 1			O94964	SOGA1	Isoform 2 of Protein SOGA1
O15417	TNRC18	Trinucleotide repeat-containing gene 18 protein			P51884	LUM	Lumican
Q99967	CITED2	Cbp/p300-interacting transactivator 2			O75094	SLIT3	Isoform 4 of Slit homolog 3 protein
Q15113	PCOLCE	Procollagen C-endopeptidase enhancer 1			Q16270	IGFBP7	Insulin-like growth factor-binding protein 7
P55061	TMBIM6	Isoform 2 of Bax inhibitor 1			O76061	STC2	Stanniocalcin-2
Q9BT92	TCHP	Trichoplein keratin filament-binding protein			O00391	QSOX1	Sulfhydryl oxidase 1
Q96F45	ZNF503	Zinc finger protein 503			P17948	FLT1	Vascular endothelial growth factor receptor 1
P01033	TIMP1	Metalloproteinase inhibitor 1			P08123	COL1A2	Collagen alpha-2(I) chain
P09486	SPARC	SPARC			Q9UI42	CPA4	Carboxypeptidase A4
Q9Y5V3	MAGED1	Isoform 2 of Melanoma-associated antigen D1			Q8N6Y2	LRRC17	Leucine-rich repeat-containing protein 17
P02452	COL1A1	Collagen alpha-1(I) chain			Q16610	ECM1	Isoform 4 of Extracellular matrix protein 1
Q12841	FSTL1	Follistatin-related protein 1			P01034	CST3	Cystatin-C
Q9H3L0	MMADHC	Methylmalonic aciduria and homocystinuria type D protein, mitochondrial			P01033	TIMP1	Metalloproteinase inhibitor 1
O00767	SCD	Acyl-CoA desaturase			P07711	CTSL	Cathepsin L1
Q8NEZ5	FBXO22	F-box only protein 22			P02461	COL3A1	Collagen alpha-1(III) chain
Q5T1J5	CHCHD2P9	Putative coiled-coil-helix-coiled-coil-helix domain-containing protein CHCHD2P9, mitochondrial			P23142	FBLN1	Fibulin-1
Q7Z2W4	ZC3HAV1	Zinc finger CCCH-type antiviral protein 1			P05997	COL5A2	Collagen alpha-2(V) chain
Q9UI42	CPA4	Carboxypeptidase A4			P12109	COL6A1	Collagen alpha-1(VI) chain
P01034	CST3	Cystatin-C			P48740	MASP1	Isoform 2 of Mannan-binding lectin serine protease 1
Q14106	TOB2	Protein Tob2			P20908	COL5A1	Collagen alpha-1(V) chain
O14746	TERT	Telomerase reverse transcriptase			P12107	COL11A1	Collagen alpha-1(XI) chain
P48740	MASP1	Isoform 2 of Mannan-binding lectin serine protease 1			Q9NZV1	CRIM1	Cysteine-rich motor neuron 1 protein
O95864	FADS2	Fatty acid desaturase 2			P35052	GPC1	Glypican-1
P08123	COL1A2	Collagen alpha-2(I) chain			P19438	TNFRSF1A	Tumor necrosis factor receptor superfamily member 1A
P35869	AHR	Aryl hydrocarbon receptor			P12110	COL6A2	Collagen alpha-2(VI) chain
P23142	FBLN1	Fibulin-1			Q9NRN5	OLFML3	Olfactomedin-like protein 3
P51884	LUM	Lumican			P02458	COL2A1	Collagen alpha-1(II) chain
P05067	APP	Amyloid beta A4 protein			O94813	SLIT2	Slit homolog 2 protein
Q96BA8	CREB3L1	Cyclic AMP-responsive element-binding protein 3-like protein 1			P07585	DCN	Decorin
Q15038	DAZAP2	DAZ-associated protein 2			P09486	SPARC	SPARC
O00391	QSOX1	Sulfhydryl oxidase 1			Q99715	COL12A1	Collagen alpha-1(XII) chain
Q16270	IGFBP7	Insulin-like growth factor-binding protein 7			P05067	APP	Amyloid beta A4 protein
P19438	TNFRSF1A	Tumor necrosis factor receptor superfamily member 1A			Q15773	MLF2	Myeloid leukemia factor 2
A6ZKI3	FAM127A	Protein FAM127A			Q15113	PCOLCE	Procollagen C-endopeptidase enhancer 1
Q7Z7L7	ZER1	Protein zer-1 homolog			Q16363	LAMA4	Laminin subunit alpha-4
P05997	COL5A2	Collagen alpha-2(V) chain
Q86WW8	COA5	Cytochrome c oxidase assembly factor 5			Term:	Extracellular matrix, 16.5 fold enrichment, p=2.32e-14
Q86WA8	LONP2	Lon protease homolog 2, peroxisomal			Uniprot-I	Gene	Description
Q9BRU2	TCEAL7	Transcription elongation factor A protein-like 7			P02452	COL1A1	Collagen alpha-1(I) chain
Q16610	ECM1	Isoform 4 of Extracellular matrix protein 1			P02461	COL3A1	Collagen alpha-1(III) chain
Q15773	MLF2	Myeloid leukemia factor 2			P23142	FBLN1	Fibulin-1
Q9NZV1	CRIM1	Cysteine-rich motor neuron 1 protein			P55268	LAMB2	Laminin subunit beta-2
Q9H3M7	TXNIP	Thioredoxin-interacting protein			P05997	COL5A2	Collagen alpha-2(V) chain
P02458	COL2A1	Collagen alpha-1(II) chain			P12109	COL6A1	Collagen alpha-1(VI) chain
Q9NRN5	OLFML3	Olfactomedin-like protein 3			P20908	COL5A1	Collagen alpha-1(V) chain
Q16363	LAMA4	Laminin subunit alpha-4			P12107	COL11A1	Collagen alpha-1(XI) chain
Q9Y6X2	PIAS3	E3 SUMO-protein ligase PIAS3			P51884	LUM	Lumican
Q99715	COL12A1	Collagen alpha-1(XII) chain			P12110	COL6A2	Collagen alpha-2(VI) chain
P07585	DCN	Decorin			P08123	COL1A2	Collagen alpha-2(I) chain
P02461	COL3A1	Collagen alpha-1(III) chain			P02458	COL2A1	Collagen alpha-1(II) chain
P12110	COL6A2	Collagen alpha-2(VI) chain			P07585	DCN	Decorin
Q9NWD8	TMEM248	Transmembrane protein 248			Q16610	ECM1	Isoform 4 of Extracellular matrix protein 1
Q5JVL4	EFHC1	EF-hand domain-containing protein 1			P09486	SPARC	SPARC
P33552	CKS2	Cyclin-dependent kinases regulatory subunit 2			Q99715	COL12A1	Collagen alpha-1(XII) chain
Q9UKI2	CDC42EP3	Cdc42 effector protein 3			Q16363	LAMA4	Laminin subunit alpha-4
Q06481	APLP2	Amyloid-like protein 2
O76061	STC2	Stanniocalcin-2			Term:	Laminin G domain, 21.5 fold enrichment, p=1.22e-04
Q9Y287	ITM2B	Integral membrane protein 2B			Uniprot-I	Gene	Description
Q9C035	TRIM5	Tripartite motif-containing protein 5			O75094	SLIT3	Isoform 4 of Slit homolog 3 protein
O94964	SOGA1	Isoform 2 of Protein SOGA1			P20908	COL5A1	Collagen alpha-1(V) chain
P07711	CTSL	Cathepsin L1			P12107	COL11A1	Collagen alpha-1(XI) chain
P30530	AXL	Tyrosine-protein kinase receptor UFO			O94813	SLIT2	Slit homolog 2 protein
Q86TB3	ALPK2	Alpha-protein kinase 2			P35442	THBS2	Thrombospondin-2
O75787	ATP6AP2	Renin receptor			Q99715	COL12A1	Collagen alpha-1(XII) chain
P41134	ID1	DNA-binding protein inhibitor ID-1			Q15113	PCOLCE	Procollagen C-endopeptidase enhancer 1
Q9BRK3	MXRA8	Matrix-remodeling-associated protein 8
Q01850	CDR2	Cerebellar degeneration-related protein 2			Term:	Proteoglycans, 18.6 fold enrichment, p=6.31e-04
P35052	GPC1	Glypican-1			Uniprot-I	Gene	Description
Q9NX18	SDHAF2	Succinate dehydrogenase assembly factor 2, mitochondrial			P35052	GPC1	Glypican-1
Q9NQX7	ITM2C	Integral membrane protein 2C			P07585	DCN	Decorin
Q9UBU8	MORF4L1	Mortality factor 4-like protein 1			Q99715	COL12A1	Collagen alpha-1(XII) chain
P35442	THBS2	Thrombospondin-2			P05067	APP	Amyloid beta A4 protein
P20908	COL5A1	Collagen alpha-1(V) chain			P51884	LUM	Lumican
P55268	LAMB2	Laminin subunit beta-2
O00762	UBE2C	Ubiquitin-conjugating enzyme E2 C			Term:	Leucine rich repeats, 6.3 fold enrichment, p=0.0033
O75094	SLIT3	Isoform 4 of Slit homolog 3 protein			Uniprot-I	Gene	Description
Q9BY42	RTFDC1	Protein RTF2 homolog			O75094	SLIT3	Isoform 4 of Slit homolog 3 protein
P17948	FLT1	Vascular endothelial growth factor receptor 1			Q8N6Y2	LRRC17	Leucine-rich repeat-containing protein 17
Q9BSV6	TSEN34	tRNA-splicing endonuclease subunit Sen34			P07585	DCN	Decorin
P84101	SERF2	Small EDRK-rich factor 2			O94813	SLIT2	Slit homolog 2 protein
P12107	COL11A1	Collagen alpha-1(XI) chain			P51884	LUM	Lumican
Q9Y5J5	PHLDA3	Pleckstrin homology-like domain family A member 3			Q9Y546
O00311	CDC7	Cell division cycle 7-related protein kinase			Q7Z7L7
Q5VZ89	DENND4C	DENN domain-containing protein 4C
O94782	USP1	Ubiquitin carboxyl-terminal hydrolase 1			Term:	Cell attachment, 17.8 fold enrichment, p=2.02e-05
O94813	SLIT2	Slit homolog 2 protein			Uniprot-I	Gene	Description
P17948	FLT1	Vascular endothelial growth factor receptor 1			P02452	COL1A1	Collagen alpha-1(I) chain
Q9Y546	LRRC42	Leucine-rich repeat-containing protein 42			P12110	COL6A2	Collagen alpha-2(VI) chain
Q9P2F8	SIPA1L2	Signal-induced proliferation-associated 1-like protein 2			P05997	COL5A2	Collagen alpha-2(V) chain
O94900	TOX	Thymocyte selection-associated high mobility group box protein TOX			P12109	COL6A1	Collagen alpha-1(VI) chain
Q8J025	APCDD1	Protein APCDD1			P35442	THBS2	Thrombospondin-2
P12109	COL6A1	Collagen alpha-1(VI) chain			Q99715	COL12A1	Collagen alpha-1(XII) chain
P12110	COL6A2	Collagen alpha-2(VI) chain			Q16363	LAMA4	Laminin subunit alpha-4
Q14534	SQLE	Squalene monooxygenase			Q9NZV1	CRIM1	Cysteine-rich motor neuron 1 protein
Q8N6Y2	LRRC17	Leucine-rich repeat-containing protein 17
O00311	CDC7	Cell division cycle 7-related protein kinase			Term:	Follistatin-like, N-terminal, 46 fold enrichment, p=0.035
O94782	USP1	Ubiquitin carboxyl-terminal hydrolase 1			Uniprot-I	Gene	Description
O94813	SLIT2	Slit homolog 2 protein			Q12841	FSTL1	Follistatin-related protein 1
P17948	FLT1	Vascular endothelial growth factor receptor 1			O94813	SLIT2	Slit homolog 2 protein
Q9Y546	LRRC42	Leucine-rich repeat-containing protein 42			P09486	SPARC	SPARC
Q9P2F8	SIPA1L2	Signal-induced proliferation-associated 1-like protein 2
Q8J025	APCDD1	Protein APCDD1			Term:	Laminin EGF-like domain, 15.9 fold enrichment, p=0.042
P12109	COL6A1	Collagen alpha-1(VI) chain			Uniprot-I	Gene	Description
P12110	COL6A2	Collagen alpha-2(VI) chain			P55268	LAMB2	Laminin subunit beta-2
Q14534	SQLE	Squalene monooxygenase			Q15773	MLF2	Myeloid leukemia factor 2
P49760	CLK2	Dual specificity protein kinase CLK2			Q16363	LAMA4	Laminin subunit alpha-4
Q8N6Y2	LRRC17	Leucine-rich repeat-containing protein 17

## Sheet: B - MVA down, VACV unchanged
101 Proteins downregulated > 2 fold by MVA but downregulated <1.25 fold by virulent VACV
Uniprot	Gene Symbol	Description			Significantly enriched clusters and their components from DAVID analysis
P25963	NFKBIA	NF-kappa-B inhibitor alpha			Term:	Glycoprotein, 2 fold enrichment, p=0.011
Q13490	BIRC2	Baculoviral IAP repeat-containing protein 2			Uniprot-I	Gene	Description
Q96E35	ZMYND19	Zinc finger MYND domain-containing protein 19			P07602	PSAP	Isoform Sap-mu-9 of Prosaposin
Q15361	TTF1	Transcription termination factor 1			Q13214	SEMA3B	Semaphorin-3B
Q00839	HNRNPU	Heterogeneous nuclear ribonucleoprotein U			Q8TF40	FNIP1	Folliculin-interacting protein 1
Q5JTW2	CEP78	Isoform 2 of Centrosomal protein of 78 kDa			O15460	P4HA2	Prolyl 4-hydroxylase subunit alpha-2
Q8TAA5	GRPEL2	GrpE protein homolog 2, mitochondrial			O75326	SEMA7A	Semaphorin-7A
Q9BSJ6	FAM64A	Protein FAM64A			P35555	FBN1	Fibrillin-1
Q9BY12	SCAPER	S phase cyclin A-associated protein in the endoplasmic reticulum			O75762	TRPA1	Transient receptor potential cation channel subfamily A member 1
Q8TDD1	DDX54	Isoform 2 of ATP-dependent RNA helicase DDX54			P35658	NUP214	Isoform 5 of Nuclear pore complex protein Nup214
Q9BVL2	NUP58	Nucleoporin p58/p45			O00300	TNFRSF11B	Tumor necrosis factor receptor superfamily member 11B
Q9UKT4	FBXO5	F-box only protein 5			P35556	FBN2	Fibrillin-2
Q7Z3B4	NUP54	Nucleoporin p54			P00749	PLAU	Urokinase-type plasminogen activator
O75326	SEMA7A	Semaphorin-7A			Q99985	SEMA3C	Semaphorin-3C
P37198	NUP62	Nuclear pore glycoprotein p62			Q02818	NUCB1	Nucleobindin-1
O75592	MYCBP2	E3 ubiquitin-protein ligase MYCBP2			P01137	TGFB1	Transforming growth factor beta-1
Q9H9L3	ISG20L2	Interferon-stimulated 20 kDa exonuclease-like 2			Q9GZX9	TWSG1	Twisted gastrulation protein homolog 1
P35555	FBN1	Fibrillin-1			Q7Z4N8	P4HA3	Isoform 3 of Prolyl 4-hydroxylase subunit alpha-3
Q9UNZ5	C19orf53	Leydig cell tumor 10 kDa protein homolog			Q13822	ENPP2	Isoform 2 of Ectonucleotide pyrophosphatase/phosphodiesterase family member 2
Q9NZJ5	EIF2AK3	Eukaryotic translation initiation factor 2-alpha kinase 3			Q495W5	FUT11	Alpha-(1,3)-fucosyltransferase 11
P13196	ALAS1	5-aminolevulinate synthase, nonspecific, mitochondrial			P37198	NUP62	Nuclear pore glycoprotein p62
Q9Y657	SPIN1	Spindlin-1			O14773	TPP1	Tripeptidyl-peptidase 1
Q6PK04	CCDC137	Coiled-coil domain-containing protein 137			Q7Z3B4	NUP54	Nucleoporin p54
O95478	NSA2	Ribosome biogenesis protein NSA2 homolog			Q9BVL2	NUP58	Nucleoporin p58/p45
Q15004	KIAA0101	PCNA-associated factor			P61812	TGFB2	Isoform B of Transforming growth factor beta-2
Q96P11	NSUN5	Isoform 2 of Probable 28S rRNA (cytosine-C(5))-methyltransferase			P49746	THBS3	Thrombospondin-3
Q5TEA3	C20orf194	Uncharacterized protein C20orf194			Q9NZJ5	EIF2AK3	Eukaryotic translation initiation factor 2-alpha kinase 3
Q9H9Y2	RPF1	Ribosome production factor 1
Q13822	ENPP2	Isoform 2 of Ectonucleotide pyrophosphatase/phosphodiesterase family member 2			Term:	Nuclear pore complex, 12.83 fold enrichment, p=6.19e-05
Q9H3C7	GGNBP2	Gametogenetin-binding protein 2			Uniprot-I	Gene	Description
Q9GZX9	TWSG1	Twisted gastrulation protein homolog 1			P37198	NUP62	Nuclear pore glycoprotein p62
O60318	MCM3AP	Germinal-center associated nuclear protein			Q9HC62	SENP2	Sentrin-specific protease 2
Q9H8M1	COQ10B	Coenzyme Q-binding protein COQ10 homolog B, mitochondrial			Q99567	NUP88	Nuclear pore complex protein Nup88
P35556	FBN2	Fibrillin-2			Q53GS7	GLE1	Nucleoporin GLE1
Q9P0S2	COX16	Cytochrome c oxidase assembly protein COX16 homolog, mitochondrial			Q7Z3B4	NUP54	Nucleoporin p54
O15460	P4HA2	Prolyl 4-hydroxylase subunit alpha-2			Q9BVL2	NUP58	Nucleoporin p58/p45
Q6DKI1	RPL7L1	60S ribosomal protein L7-like 1			P35658	NUP214	Isoform 5 of Nuclear pore complex protein Nup214
Q8NFW8	CMAS	N-acylneuraminate cytidylyltransferase			O60318	MCM3AP	Germinal-center associated nuclear protein
Q96GQ7	DDX27	Probable ATP-dependent RNA helicase DDX27
Q8N137	CNTROB	Isoform 2 of Centrobin
P16989	YBX3	Y-box-binding protein 3
Q9NQX5	NPDC1	Neural proliferation differentiation and control protein 1
Q9HC62	SENP2	Sentrin-specific protease 2
Q9Y2V0	C15orf41	Uncharacterized protein C15orf41
Q495W5	FUT11	Alpha-(1,3)-fucosyltransferase 11
O15079	SNPH	Isoform 2 of Syntaphilin
P54274	TERF1	Telomeric repeat-binding factor 1
Q86X95	CIR1	Corepressor interacting with RBPJ 1
Q9BW61	DDA1	DET1- and DDB1-associated protein 1
P53567	CEBPG	CCAAT/enhancer-binding protein gamma
Q99567	NUP88	Nuclear pore complex protein Nup88
Q96QE3	ATAD5	ATPase family AAA domain-containing protein 5
Q96MT8	CEP63	Centrosomal protein of 63 kDa
O75319	DUSP11	RNA/RNP complex-1-interacting phosphatase
Q53EP0	FNDC3B	Fibronectin type III domain-containing protein 3B
P14921	ETS1	Protein C-ets-1
Q9Y2J4	AMOTL2	Isoform 4 of Angiomotin-like protein 2
Q9NW13	RBM28	RNA-binding protein 28
Q15653	NFKBIB	NF-kappa-B inhibitor beta
Q15014	MORF4L2	Mortality factor 4-like protein 2
Q6ICL3	TANGO2	Isoform 4 of Transport and Golgi organization protein 2 homolog
Q99640	PKMYT1	Membrane-associated tyrosine- and threonine-specific cdc2-inhibitory kinase
O15525	MAFG	Transcription factor MafG
Q53GS7	GLE1	Nucleoporin GLE1
Q9BYG3	NIFK	MKI67 FHA domain-interacting nucleolar phosphoprotein
Q14135	VGLL4	Isoform 4 of Transcription cofactor vestigial-like protein 4
Q6P0N0	MIS18BP1	Mis18-binding protein 1
A8MTZ0	BBIP1	BBSome-interacting protein 1
Q8N4C6	NIN	Isoform 7 of Ninein
Q9BXS6	NUSAP1	Nucleolar and spindle-associated protein 1
Q9UKA8	RCAN3	Calcipressin-3
P24928	POLR2A	DNA-directed RNA polymerase II subunit RPB1
O75683	SURF6	Surfeit locus protein 6
O14773	TPP1	Tripeptidyl-peptidase 1
Q96Q89	KIF20B	Isoform 2 of Kinesin-like protein KIF20B
P12814	ACTN1	Alpha-actinin-1
P49746	THBS3	Thrombospondin-3
P00749	PLAU	Urokinase-type plasminogen activator
Q02818	NUCB1	Nucleobindin-1
Q9P031	CCDC59	Thyroid transcription factor 1-associated protein 26
P35658	NUP214	Isoform 5 of Nuclear pore complex protein Nup214
Q1ED39	KNOP1	Lysine-rich nucleolar protein 1
Q13214	SEMA3B	Semaphorin-3B
Q9UKV5	AMFR	E3 ubiquitin-protein ligase AMFR
P07602	PSAP	Isoform Sap-mu-9 of Prosaposin
P01137	TGFB1	Transforming growth factor beta-1
Q15034	HERC3	Probable E3 ubiquitin-protein ligase HERC3
Q99985	SEMA3C	Semaphorin-3C
O15015	ZNF646	Isoform 2 of Zinc finger protein 646
P61812	TGFB2	Isoform B of Transforming growth factor beta-2
Q9NZL6	RGL1	Isoform B of Ral guanine nucleotide dissociation stimulator-like 1
P54098	POLG	DNA polymerase subunit gamma-1
O00300	TNFRSF11B	Tumor necrosis factor receptor superfamily member 11B
Q8TF40	FNIP1	Folliculin-interacting protein 1
O75762	TRPA1	Transient receptor potential cation channel subfamily A member 1
Q6ZUT9	DENND5B	Isoform 2 of DENN domain-containing protein 5B
Q969X0	RILPL2	RILP-like protein 2
Q7Z4N8	P4HA3	Isoform 3 of Prolyl 4-hydroxylase subunit alpha-3
Q14207	NPAT	Protein NPAT
Q6P4F7	ARHGAP11A	Rho GTPase-activating protein 11A
Q9BYX7	POTEKP	Putative beta-actin-like protein 3

## Sheet: C - MVA unchanged, VACV down
21 Proteins downregulated > 2 fold by virulent VACV but downregulated <1.25 fold by MVA
Uniprot	Gene Symbol	Description			Significantly enriched clusters and their components from DAVID analysis
P35712	SOX6	Transcription factor SOX-6			Term:	Innate immunity, 9.4 fold enrichment, p=0.02701
P09913	IFIT2	Interferon-induced protein with tetratricopeptide repeats 2			Uniprot-I	Gene	Description
Q86TG7	PEG10	Retrotransposon-derived protein PEG10			P09913	IFIT2	Interferon-induced protein with tetratricopeptide repeats 2
Q08629	SPOCK1	Testican-1			Q12851	MAP4K2	Mitogen-activated protein kinase kinase kinase kinase 2
Q12805	EFEMP1	EGF-containing fibulin-like extracellular matrix protein 1			Q13325	IFIT5	Interferon-induced protein with tetratricopeptide repeats 5
Q14674	ESPL1	Separin			P09914	IFIT1	Interferon-induced protein with tetratricopeptide repeats 1
Q9H0V1	TMEM168	Transmembrane protein 168			O14879	IFIT3	Interferon-induced protein with tetratricopeptide repeats 3
Q7Z2Z1	TICRR	Treslin
P18827	SDC1	Syndecan-1			Term:	Peptidyl-tyrosine phosphorylation, 28.3 fold enrichment, p=0.00482
Q15283	RASA2	Ras GTPase-activating protein 2			Uniprot-I	Gene	Description
Q13325	IFIT5	Interferon-induced protein with tetratricopeptide repeats 5			P54753	EPHB3	Ephrin type-B receptor 3
P86452	ZBED6	Zinc finger BED domain-containing protein 6			P54764	EPHA4	Ephrin type-A receptor 4
P16591	FER	Tyrosine-protein kinase Fer			P29323	EPHB2	Ephrin type-B receptor 2
P29323	EPHB2	Ephrin type-B receptor 2			P16591	FER	Tyrosine-protein kinase Fer
Q12851	MAP4K2	Mitogen-activated protein kinase kinase kinase kinase 2			Q12805	EFEMP1	EGF-containing fibulin-like extracellular matrix protein 1
Q14160	SCRIB	Isoform 3 of Protein scribble homolog
Q9BWT1	CDCA7	Isoform 2 of Cell division cycle-associated protein 7
P54753	EPHB3	Ephrin type-B receptor 3
P54764	EPHA4	Ephrin type-A receptor 4
P09914	IFIT1	Interferon-induced protein with tetratricopeptide repeats 1
O14879	IFIT3	Interferon-induced protein with tetratricopeptide repeats 3

## Sheet: D - MVA and VACV both up
9 Proteins upregulated > 2 fold by both MVA and virulent VACV
Uniprot	Gene Symbol	Description			Significantly enriched clusters and their components from DAVID analysis
P20742	PZP	Pregnancy zone protein			Term:	Glycoprotein, 4.7 fold enrichment, p=0.025
P01023	A2M	Alpha-2-macroglobulin			Uniprot-I	Gene	Description
P28562	DUSP1	Dual specificity protein phosphatase 1			P02771	AFP	Alpha-fetoprotein
P35354	PTGS2	Prostaglandin G/H synthase 2			Q68DH5	LMBRD2	LMBR1 domain-containing protein 2
P22736	NR4A1	Isoform 2 of Nuclear receptor subfamily 4 group A member 1			P02649	APOE	Apolipoprotein E
P02649	APOE	Apolipoprotein E			P35354	PTGS2	Prostaglandin G/H synthase 2
Q12802	AKAP13	Isoform 2 of A-kinase anchor protein 13			P20742	PZP	Pregnancy zone protein
Q68DH5	LMBRD2	LMBR1 domain-containing protein 2			P01023	A2M	Alpha-2-macroglobulin
P02771	AFP	Alpha-fetoprotein

## Sheet: E - MVA up, VACV unchanged
36 Proteins upregulated > 2 fold by MVA but upregulated <1.25 fold by virulent VACV
Uniprot	Gene Symbol	Description			Significantly enriched clusters and their components from DAVID analysis
P13498	CYBA	Cytochrome b-245 light chain			Term:	Glycoprotein, 2.8 fold enrichment, p=0.037
Q9H7F4	TMEM185B	Transmembrane protein 185B			Uniprot-I	Gene	Description
Q56NI9	ESCO2	N-acetyltransferase ESCO2			P19823	ITIH2	Inter-alpha-trypsin inhibitor heavy chain H2
Q99523	SORT1	Sortilin			P02671	FGA	Fibrinogen alpha chain
Q5VY43	PEAR1	Platelet endothelial aggregation receptor 1			O75084	FZD7	Frizzled-7
Q93073	SECISBP2L	Selenocysteine insertion sequence-binding protein 2-like			Q99523	SORT1	Sortilin
Q13530	SERINC3	Serine incorporator 3			P56937	HSD17B7	3-keto-steroid reductase
Q2PPJ7	RALGAPA2	Ral GTPase-activating protein subunit alpha-2			Q5VXT5	SYPL2	Synaptophysin-like protein 2
P36021	SLC16A2	Monocarboxylate transporter 8			Q13530	SERINC3	Serine incorporator 3
Q8IYM9	TRIM22	E3 ubiquitin-protein ligase TRIM22			Q9C0C4	SEMA4C	Semaphorin-4C
Q5VXT5	SYPL2	Synaptophysin-like protein 2			Q9Y625	GPC6	Glypican-6
Q9Y2B1	TMEM5	Transmembrane protein 5			Q5VY43	PEAR1	Platelet endothelial aggregation receptor 1
P56937	HSD17B7	3-keto-steroid reductase			O43292	GPAA1	Glycosylphosphatidylinositol anchor attachment 1 protein
Q8TCG5	CPT1C	Carnitine O-palmitoyltransferase 1, brain isoform
Q9BUN8	DERL1	Derlin-1
Q9C0C4	SEMA4C	Semaphorin-4C
P35712	SOX6	Transcription factor SOX-6
O75084	FZD7	Frizzled-7
Q6ZS30	NBEAL1	Neurobeachin-like protein 1
Q8N157	AHI1	Jouberin
Q96DT5	DNAH11	Dynein heavy chain 11, axonemal
Q674X7	KAZN	Kazrin
P09913	IFIT2	Interferon-induced protein with tetratricopeptide repeats 2
P02100	HBE1	Hemoglobin subunit epsilon
Q9Y6W6	DUSP10	Dual specificity protein phosphatase 10
Q9HC78	ZBTB20	Zinc finger and BTB domain-containing protein 20
P19823	ITIH2	Inter-alpha-trypsin inhibitor heavy chain H2
O43292	GPAA1	Glycosylphosphatidylinositol anchor attachment 1 protein
P46199	MTIF2	Translation initiation factor IF-2, mitochondrial
Q96AZ6	ISG20	Interferon-stimulated gene 20 kDa protein
P02671	FGA	Fibrinogen alpha chain
Q96PX6	CCDC85A	Coiled-coil domain-containing protein 85A
O00192	ARVCF	Armadillo repeat protein deleted in velo-cardio-facial syndrome
Q9Y625	GPC6	Glypican-6
Q9UI95	MAD2L2	Mitotic spindle assembly checkpoint protein MAD2B
Q8IYY4	DZIP1L	Zinc finger protein DZIP1L

## Sheet: F - MVA unchanged, VACV up
22 Proteins upregulated > 2 fold by MVA but upregulated <1.25 fold by virulent VACV
Uniprot	Gene Symbol	Description			Significantly enriched clusters and their components from DAVID analysis
Q9H8M1	COQ10B	Coenzyme Q-binding protein COQ10 homolog B, mitochondrial			None
Q9UBC1	NFKBIL1	NF-kappa-B inhibitor-like protein 1
Q86VK4	ZNF410	Isoform 5 of Zinc finger protein 410
O75419	CDC45	Isoform 3 of Cell division control protein 45 homolog
Q8TF76	GSG2	Serine/threonine-protein kinase haspin
Q9H0J9	PARP12	Poly [ADP-ribose] polymerase 12
Q9ULL8	SHROOM4	Protein Shroom4
Q8IWT3	CUL9	Cullin-9
Q9P0U3	SENP1	Sentrin-specific protease 1
Q9NRI5	DISC1	Disrupted in schizophrenia 1 protein
P30711	GSTT1	Glutathione S-transferase theta-1
Q93097	WNT2B	Protein Wnt-2b
Q9Y600	CSAD	Isoform 3 of Cysteine sulfinic acid decarboxylase
Q5U5R9	HECTD2	Probable E3 ubiquitin-protein ligase HECTD2
Q14CW9	ATXN7L3	Isoform 2 of Ataxin-7-like protein 3
Q9HD47	RANGRF	Ran guanine nucleotide release factor
Q8IVF4	DNAH10	Dynein heavy chain 10, axonemal
Q9NP73	ALG13	Putative bifunctional UDP-N-acetylglucosamine transferase and deubiquitinase ALG13
O43347	MSI1	RNA-binding protein Musashi homolog 1
Q9H939	PSTPIP2	Proline-serine-threonine phosphatase-interacting protein 2
Q96BW9	TAMM41	Phosphatidate cytidylyltransferase, mitochondrial
P21817	RYR1	Ryanodine receptor 1
