# Supplementary material for: Quantitative temporal analysis of modified vaccinia Ankara, the monkeypox and smallpox vaccine
Source: Research Square preprint supplement (doi:10.21203/rs.3.rs-1850393/v1), 2022-07-13
Supplement: Supplementary file 4 [file f1ece99cdedc6b6da2261d79.xlsx]

## Sheet: Sheet1
MVA proteins and their VACV-WR orthologues
MVA Uniprot	MVA gene symbol	MVA description	MVA protein temporal class (Fig 4A)	VACV-WR Uniprot	VACV-WR gene symbol	VACV-WR description	VACV-WR %identity	VACV-WR sequence coverage	comp_genome_1_hit	VACV-WR sequence length	VACV-WR functional category (Soday et al 2019)
O57216	VLTF2	Viral late gene transcription factor 2	3	P07610	A1	VLTF2_Viral late gene transcription factor 2	0.993	0.993	bi (<->)	150	Transcription
Q6J3A9	ACAM3000_MVA_121	Major core protein 4a precursor	3	P16715	A10	VACWR129_Major core protein 4a precursor	0.985	0.999	bi (<->)	891	Virion association
Q76RB8	MVA122	Protein A11	4	Q80HV8	A11	VACWR130_Protein A11	0.991	0.997	bi (<->)	318	Virion association
O57224	MVA123	25 kDa core protein A12L	4	Q80HV7	A12	VACWR131_25 kDa core protein A12L	0.969	0.995	bi (<->)	192	Virion association
P68717	MVA126	Core protein A15	3	P68718	A15	VACWR135_Core protein A15	1	0.989	bi (<->)	94	Virion association
O93122	MVA127	Virion membrane protein A16	2	P16710	A16	VACWR136_Virion membrane protein A16	0.997	0.997	bi (<->)	377	Virion association
O57226	MVA128	23k IMV membrane protein	3	P68593	A17	VACWR137_Virion membrane protein A17 precursor	0.99	0.995	bi (<->)	203	Virion association
O57227	MVA129	Transcript termination protein A18	3	P16712	A18	VACWR138_Transcript termination protein A18	0.984	0.998	bi (<->)	493	Transcription
P68713	MVA130	Protein A19	4	P68714	A19	VACWR139_Protein A19	1	0.987	bi (<->)	77	Virion association
Q76ZR2	VLTF3	Viral late gene transcription factor 3	2	P68319	A2	VLTF3_Viral late gene transcription factor 3	1	0.996	bi (<->)	224	Transcription
O57217	MVA113	Putative 8.9k protein	4	P07608	A2.5	VACWR121_Protein A2.5	0.974	0.987	bi (<->)	76	Virion association
P68709	MVA132	DNA polymerase processivity factor component A20	2	P68710	A20	VACWR141_DNA polymerase processivity factor component A20	1	0.998	bi (<->)	426	DNA replication
P68711	MVA131	Virion membrane protein A21	4	P68712	A21	VACWR140_Virion membrane protein A21	1	0.991	bi (<->)	117	Virion association
O57229	MVA133	Holliday junction resolvase	4	Q80HV3	A22	VACWR142_Resolvase A22	0.995	0.995	bi (<->)	187	DNA replication
Q76RB3	VITF3L	Intermediate transcription factor 3 large subunit	2	Q80HV2	A23	VITF3L_Intermediate transcription factor 3 large subunit	0.997	0.997	bi (<->)	382	Transcription
O57230	RPO132	DNA-directed RNA polymerase 133 kDa polypeptide	1	Q76ZP7	A24	RPO132_DNA-directed RNA polymerase 133 kDa polypeptide	0.998	0.992	bi (<->)	1164	Transcription
O57231	MVA137	Cowpox A-type inclusion protein	3	P24758	A26	VACWR149_Protein A26	0.991	0.452	bi (<->)	500	Virion association
O57232	MVA138	14k membrane protein	4	P11258	A27	VACWR150_Protein A27	0.991	0.991	bi (<->)	110	Virion association
P60671	MVA139	Envelope protein A28 homolog	3	P68633	A28	VACWR151_Envelope protein A28	1	0.993	bi (<->)	146	Virion association
O57233	RPO35	DNA-directed RNA polymerase 35 kDa subunit	2	P24757	A29	RPO35_DNA-directed RNA polymerase 35 kDa subunit	0.997	0.997	bi (<->)	305	Transcription
O93121	MVA114	Major core protein 4b	3	P06440	A3	VACWR122_Major core protein 4b	0.994	0.998	bi (<->)	643	Virion association
A9J0W1	MVA141	8.7k core protein	4	P68596	A30	VACWR153_Protein A30	1	0.987	bi (<->)	77	Virion association
O57234	MVA142	Putative 14.4k protein	2	P24760	A31	VACWR154_Protein A31	0.983	0.919	bi (<->)	124	Unknown
O57235	MVA143	Putative 30.8k protein	3	P68615	A32	VACWR155_Protein A32	0.996	0.993	bi (<->)	270	Virion association
O57236	MVA144	EEV glycoprotein	2	P68617	A33	VACWR156_Protein A33	0.984	0.995	bi (<->)	185	Virion association
O57237	MVA145	EEV glycoprotein	4	P24761	A34	VACWR157_Protein A34	0.994	0.994	bi (<->)	168	Virion association
Q76RB0	MVA146	20k virulence determinant	1	Q01232	A35	VACWR158_Protein A35	0.994	0.994	bi (<->)	176	Host interaction
O57238	MVA147	EEV membrane protein	2	P68619	A36	VACWR159_Protein A36	0.954	0.977	bi (<->)	221	Virion association
O57239	MVA148	Putative 29.8k protein	2	P24762	A37	VACWR160_Protein A37	0.981	0.996	bi (<->)	263	Unknown
O57240	MVA149	CD47-like putative membrane protein	3	P24763	A38	VACWR162_Protein A38	0.964	0.996	bi (<->)	277	Virion association
O57218	MVA115	39kDa core protein	3	P29191	A4	VACWR123_39kDa core protein	0.954	0.996	bi (<->)	281	Virion association
O57241	MVA152	C-type lectin-like type-II membrane protein	1	P24765	A40	VACWR165_Protein A40	0.981	0.987	bi (<->)	159	Host interaction
O57242	MVA153	30 kDa secreted glycoprotein	1	P24766	A41	VACWR166_Protein A41	0.973	0.995	bi (<->)	219	Host interaction
O57243	MVA154	Profilin	2	Q76ZN5	A42	VACWR167_Profilin	0.962	0.992	bi (<->)	133	Virion association
O57244	MVA155	Membrane glycoprotein	2	P26671	A43	VACWR168_Protein A43	0.979	0.995	bi (<->)	194	Host interaction
O57245	MVA157	3 beta-hydroxysteroid dehydrogenase/Delta 5-->4-isomerase	2	P26670	A44	VACWR170_3 beta-hydroxysteroid dehydrogenase/Delta 5-->4-isomerase	0.991	0.997	bi (<->)	346	Host interaction
O57247	MVA159	Putative 27.6k protein	2	P26672	A46	VACWR172_Protein A46	0.992	0.996	bi (<->)	240	Host interaction
Q76RA8	TMK	Thymidylate kinase	2	Q80HT9	A48	TMK_Thymidylate kinase	1	0.995	bi (<->)	204	DNA replication
O57249	MVA162	Protein A49	3	P31037	A49	VACWR175_Protein A49R	0.988	0.994	bi (<->)	162	Host interaction
Q76ZQ8	RPO19	DNA-directed RNA polymerase 19 kDa subunit	2	P68611	A5	RPO19_DNA-directed RNA polymerase 19 kDa subunit	1	0.994	bi (<->)	164	Transcription
O57250	LIG	DNA ligase	2	P16272	A50	LIG_DNA ligase	0.991	0.998	bi (<->)	552	DNA replication
Q89182	HA	Protein A56	2	Q01218	A56	HA_Protein A56	0.987	0.997	bi (<->)	314	Virion association
O57219	MVA117	Putative 43.1k protein	2	P29192	A6	VACWR125_Protein A6	0.989	0.997	bi (<->)	371	Virion association
O57220	VETFL	Early transcription factor 82 kDa subunit	3	P20636	A7	VETFL_Early transcription factor 82 kDa subunit	0.997	0.999	bi (<->)	710	Transcription
P68719	VITF3S	Intermediate transcription factor 3 small subunit	2	P68720	A8	VITF3S_Intermediate transcription factor 3 small subunit	1	0.997	bi (<->)	288	Transcription
O57222	MVA120	Virion membrane protein A9	3	Q85320	A9	VACWR128_Virion membrane protein A9	0.987	0.685	bi (<->)	108	Virion association
O57252	VPK1	B1 kinase	2	P16913	B1	VPK1_Serine/threonine-protein kinase 1	0.997	0.997	bi (<->)	300	DNA replication
O57258	MVA179	Putative 8.5k protein	2	Q01229	B11	VACWR193_Protein B11	0.944	0.972	bi (<->)	72	Unknown
O57259	MVA180	Probable serine/threonine-protein kinase B12	1	P24362	B12	VACWR194_Probable serine/threonine-protein kinase B12	0.989	0.996	bi (<->)	283	Unknown
O57265	MVA189	Putative 21.7k protein	1	P24772	B15	VACWR196_Protein B14	0.366	0.933	uni (->)	149	Host interaction
O57261	MVA184	Interleukin-1-binding protein	4	P25212	B16	VACWR197_Interleukin-1-binding protein	0.991	0.997	bi (<->)	326	Host interaction
O57262	MVA185	Putative 39.6k protein	2	Q01221	B17	VACWR198_Protein B17	0.982	0.997	bi (<->)	340	Unknown
O57263	MVA186	Ankyrin repeat protein B18	1	Q01222	B18	VACWR199_Ankyrin repeat protein B19	0.993	0.998	bi (<->)	574	Host interaction
Q6J345	ACAM3000_MVA_187	IFN-alpha/beta-receptor-like secreted glycoprotein	2	P25213	B19	VACWR200_Soluble interferon alpha/beta receptor B18	0.987	0.655	bi (<->)	351	Host interaction
Q6J362	ACAM3000_MVA_168	Poxin	1	Q01225	B2	VACWR184_Protein B2	0.991	0.995	bi (<->)	219	Host interaction
O57254	PS/HR	Protein B5	4	Q01227	B5	PS/HR_Plaque-size/host range protein	0.972	0.997	bi (<->)	317	Virion association
Q76RA5	MVA174	Ankyrin-like	2	P68442	B6	VACWR188_Protein B6	1	0.994	bi (<->)	173	Unknown
O57255	MVA175	21kDa protein	4	P68444	B7	VACWR189_Protein B7	0.973	0.995	bi (<->)	182	Host interaction
Q6J356	ACAM3000_MVA_176	Soluble interferon-gamma receptor-like	2	P24770	B8	VACWR190_Soluble interferon gamma receptor B8	0.938	0.882	bi (<->)	272	Host interaction
O57167	MVA006	Protein C10	1	P03296	C10	VACWR010_Protein C10	0.982	0.997	bi (<->)	331	Host interaction
O57166	VGF	Pro-vaccinia growth factor	1	P01136	C11	VGF-1_Pro-vaccinia growth factor	0.971	0.993	bi (<->)	140	Host interaction
O93115	MVA019	Putative 18.2k protein	1	P17362	C6	VACWR022_Protein C6	0.974	0.993	bi (<->)	151	Host interaction
P68598	MVA018	Interferon antagonist C7	2	P68600	C7	VACWR021_Interferon antagonist C7	1	0.993	bi (<->)	150	Host interaction
O57170	MVA017	Putative 20.8k protein	4	P17364	C8	VACWR020_Protein C8	0.949	0.994	bi (<->)	177	Unknown
O57209	MVA098	mRNA-capping enzyme catalytic subunit	2	P04298	D1	VACWR106_mRNA-capping enzyme catalytic subunit	0.995	0.999	bi (<->)	844	Transcription
O57213	MVA107	mRNA-decapping protein D10	2	P04312	D10	VACWR115_mRNA-decapping protein D10	0.988	0.996	bi (<->)	248	Host interaction
O57214	NPH1	Nucleoside triphosphatase I	4	P05807	D11	NPH1_Nucleoside triphosphatase I	0.994	0.998	bi (<->)	631	Transcription
O57215	MVA109	mRNA-capping enzyme regulatory subunit	2	P04318	D12	VACWR117_mRNA-capping enzyme regulatory subunit	0.997	0.997	bi (<->)	287	Transcription
Q76ZR4	MVA110	Scaffold protein D13	4	P68440	D13	VACWR118_Scaffold protein D13	1	0.998	bi (<->)	551	Virion association
Q76RC3	MVA099	16.9k structural protein	2	P04300	D2	VACWR107_Core protein D2	0.986	0.993	bi (<->)	146	Virion association
O57210	MVA100	Core protein D3	2	P04302	D3	VACWR108_Core protein D3	0.97	0.996	bi (<->)	237	Virion association
Q91UM2	UNG	Uracil-DNA glycosylase	2	P04303	D4	UNG_Uracil-DNA glycosylase	0.995	0.995	bi (<->)	218	DNA replication
O93119	MVA102	Primase D5	2	P04305	D5	VACWR110_Primase D5	0.995	0.999	bi (<->)	785	DNA replication
O93120	VETFS	Early transcription factor 70 kDa subunit	3	P04308	D6	VETFS_Early transcription factor 70 kDa subunit	0.998	0.998	bi (<->)	637	Transcription
Q76ZS0	RPO18	DNA-directed RNA polymerase 18 kDa subunit	2	P04310	D7	RPO18_DNA-directed RNA polymerase 18 kDa subunit	1	0.994	bi (<->)	161	Transcription
O57211	MVA105	Cell surface-binding protein	3	P04195	D8	VACWR113_Cell surface-binding protein	0.984	0.997	bi (<->)	304	Virion association
O57212	MVA106	25k mutT-like protein	1	P04311	D9	VACWR114_mRNA-decapping protein D9	0.991	0.995	bi (<->)	213	Host interaction
O57184	PAPL	Poly(A) polymerase catalytic subunit	2	P23371	E1	PAPL_Poly(A) polymerase catalytic subunit	0.996	0.998	bi (<->)	479	Transcription
Q76RE2	MVA057	Sulfhydryl oxidase	4	P23373	E10	VACWR066_Probable FAD-linked sulfhydryl oxidase E10	1	0.989	bi (<->)	95	Virion association
Q76RE1	MVA058	Putative 14.9k protein	3	P68448	E11	VACWR067_Core protein E11	1	0.992	bi (<->)	129	Virion association
O57185	MVA049	Putative 85.9k protein	2	P21604	E2	VACWR058_Protein E2	0.996	0.999	bi (<->)	737	Virion association
O57186	MVA050	Double-stranded RNA binding protein	2	P21605	E3	VACWR059_Protein E3	0.958	0.995	bi (<->)	190	Host interaction
O57187	RPO30	DNA-directed RNA polymerase 30 kDa polypeptide	2	P21603	E4	RPO30_DNA-directed RNA polymerase 30 kDa polypeptide	0.992	0.996	bi (<->)	259	Transcription
Q6J3H8	ACAM3000_MVA_052	Protein E5	1	P21606	E5	VACWR061_Protein E5	0.987	0.927	bi (<->)	341	Unknown
O57189	MVA053	Expressed protein with predicted Mr of 66,700	2	P21607	E6	VACWR062_Protein E6	0.996	0.998	bi (<->)	567	Virion association
O57190	MVA055	Membrane protein	2	P23372	E8	VACWR064_Protein E8	0.993	0.996	bi (<->)	273	Virion association
O57191	POL	DNA polymerase	2	P06856	E9	POL_DNA polymerase	0.998	0.999	bi (<->)	1006	DNA replication
O57173	MVA029	Protein F1	1	P24356	F1	VACWR040_Protein F1	0.973	0.996	bi (<->)	226	Host interaction
O57177	VPK2	Serine/threonine-protein kinase 2	3	Q89121	F10	VPK2_Serine/threonine-protein kinase 2	0.998	0.998	bi (<->)	439	Virion association
O57178	MVA042	Protein F12	2	Q80HX6	F12	VACWR051_Protein F12	0.986	0.998	bi (<->)	635	Virion association
O57179	MVA043	Envelope phospholipase F13	4	P04021	F13	VACWR052_Envelope protein F13	0.995	0.997	bi (<->)	372	Virion association
O57181	MVA045	Protein F15	1	Q80HX4	F15	VACWR054_Protein F15	0.993	0.993	bi (<->)	147	Unknown
O57182	MVA046	Protein F16	1	Q80HX3	F16	VACWR055_Protein F16	0.996	0.996	bi (<->)	231	Unknown
O57183	MVA047	11k DNA binding phosphoprotein	3	P07396	F17	VACWR056_Core phosphoprotein F17	0.98	0.99	bi (<->)	101	Virion association
Q76RE7	DUT	Deoxyuridine 5'-triphosphate nucleotidohydrolase	2	P17374	F2	DUT_Deoxyuridine 5'-triphosphate nucleotidohydrolase	0.986	0.993	bi (<->)	147	DNA replication
O57174	MVA031	Kelch repeat protein F3	1	P24357	F3	VACWR042_Kelch repeat protein F3	0.99	0.998	bi (<->)	480	Host interaction
O57175	MVA032	Ribonucleoside-diphosphate reductase small chain	2	P11158	F4	VACWR043_Ribonucleoside-diphosphate reductase small chain	0.997	0.997	bi (<->)	319	DNA replication
Q6J3J6	ACAM3000_MVA_033	Pox_I6 domain-containing protein	2	P24358	F5	VACWR044_36 kDa major membrane protein F5	1	0.671	bi (<->)	322	Unknown
Q76ZW9	MVA035	Protein F6	1	P68603	F6	VACWR045_Protein F6	1	0.986	bi (<->)	74	Unknown
Q76RE5	MVA036	Protein F7	2	P24359	F7	VACWR046_Protein F7	1	0.988	bi (<->)	80	Unknown
O57176	MVA037	IActA-like proline repeat-containing protein	4	P24360	F8	VACWR047_Protein F8	0.969	0.985	bi (<->)	65	Unknown
Q76RE4	MVA038	Putative 23.8k protein	3	P24361	F9	VACWR048_Protein F9	0.991	0.995	bi (<->)	212	Virion association
P68492	MVA070	Metalloendopeptidase G1	3	P16713	G1	VACWR078_Metalloendopeptidase G1	0.998	0.998	bi (<->)	591	Virion association
Q76RD4	MVA072	IBT-dependent protein	2	P68456	G2	VACWR080_Late transcription elongation factor G2	1	0.995	bi (<->)	220	Transcription
Q6J3F9	ACAM3000_MVA_071	Protein G3	3	P68458	G3	VACWR079_Protein G3	1	0.703	bi (<->)	111	Virion association
O57195	MVA073	Glutaredoxin-2	4	P68460	G4	VACWR081_Glutaredoxin-2	0.992	0.992	bi (<->)	124	Virion association
O57196	MVA074	Putative 49.8k protein	2	Q80HX0	G5	VACWR082_Putative nuclease G5	0.986	0.998	bi (<->)	434	DNA replication
P68314	RPO7	DNA-directed RNA polymerase 7 kDa subunit	1	P68317	G5.5	RPO7_DNA-directed RNA polymerase 7 kDa subunit	1	0.984	bi (<->)	63	Transcription
P68715	MVA077	Assembly protein G7	3	P68716	G7	VACWR085_Assembly protein G7	1	0.997	bi (<->)	371	Virion association
O57198	VLTF1	Late transcription factor 1	3	P68613	G8	VLTF1_Late transcription factor 1	0.996	0.996	bi (<->)	260	Transcription
O57199	MVA079	Myristoylated protein G9	3	P07611	G9	VACWR087_Myristoylated protein G9	0.994	0.997	bi (<->)	340	Virion association
Q76RC6	MVA091	Protein tyrosine/serin phosphatase	4	P07239	H1	H1L_Dual specificity protein phosphatase H1	1	0.994	bi (<->)	171	Transcription
O57205	MVA092	Late protein H2	3	P08583	H2	VACWR100_Protein H2	1	0.995	bi (<->)	189	Virion association
O57206	MVA093	IMV heparin binding surface protein	4	P07240	H3	VACWR101_Envelope protein H3	0.985	0.997	bi (<->)	324	Virion association
O57207	RAP94	RNA polymerase-associated transcription-specificity factor RAP94	4	P68438	H4	RAP94_RNA polymerase-associated transcription-specificity factor RAP94	0.997	0.999	bi (<->)	795	Transcription
Q76RC5	MVA095	Late gene transcription factor VLTF-4	2	P07242	H5	VACWR103_Late transcription elongation factor H5	1	0.995	bi (<->)	203	Transcription
Q76ZS7	TOP1	DNA topoisomerase 1B	3	P68698	H6	TOP1_DNA topoisomerase 1B	1	0.997	bi (<->)	314	Transcription
O57208	MVA097	Late protein H7	4	P08586	H7	VACWR105_Late protein H7	0.993	0.993	bi (<->)	146	Virion association
O93117	MVA062	Telomere-binding protein I1	3	P16714	I1	VACWR070_Telomere-binding protein I1	0.994	0.997	bi (<->)	312	Virion association
O93118	MVA064	30k DNA binding phosphoprotein	2	P12923	I3	VACWR072_Protein I3	0.993	0.996	bi (<->)	269	DNA replication
Q76RD8	MVA065	Ribonucleoside-diphosphate reductase large subunit	2	P12848	I4	VACWR073_Ribonucleoside-diphosphate reductase large subunit	0.999	0.999	bi (<->)	771	DNA replication
Q76RD7	MVA066	IMV protein VP13	4	P12924	I5	VACWR074	0.987	0.987	bi (<->)	79
Q76RD6	MVA067	Putative 43.5k protein	1	P68462	I6	VACWR075_Telomere-binding protein I6	1	0.997	bi (<->)	382	Virion association
O57192	MVA068	Topoisomerase II	3	P12926	I7	VACWR076_Core protease I7	0.998	0.998	bi (<->)	423	Virion association
O57193	NPH2	RNA helicase NPH-II	3	P12927	I8	NPH2_RNA helicase NPH-II	0.996	0.999	bi (<->)	676	Transcription
Q6J3E5	ACAM3000_MVA_085	Virion protein	3	P07616	J1	VACWR093_Protein J1	0.986	0.935	bi (<->)	153	Virion association
O57203	TK	Thymidine kinase	2	P68563	J2	TK_Thymidine kinase	0.989	0.994	bi (<->)	177	DNA replication
Q76ZT1	PAPS	Cap-specific mRNA (nucleoside-2'-O-)-methyltransferase	2	P07617	J3	PAPS_Cap-specific mRNA (nucleoside-2'-O-)-methyltransferase	1	0.997	bi (<->)	333	Transcription
Q76RC8	MVA088	DNA-directed RNA polymerase subunit	2	P68609	J4	RPO22_DNA-directed RNA polymerase 22 kDa subunit	1	0.995	bi (<->)	185	Transcription
Q76VD9	MVA089	Protein J5	3	P07618	J5	VACWR097_Protein J5	1	0.992	bi (<->)	133	Virion association
O57204	RPO147	DNA-directed RNA polymerase 147 kDa polypeptide	2	P07392	J6	RPO147_DNA-directed RNA polymerase 147 kDa polypeptide	0.991	0.999	bi (<->)	1287	Transcription
Q85339	SPI-3	Protein K2	2	P18384	K2	SPI-3_Protein K2	0.995	0.997	bi (<->)	369	Host interaction
O57172	MVA025	DNA nicking-joining enzyme	2	P18377	K4	VACWR035_Phospholipase-D-like protein K4	0.991	0.998	bi (<->)	424	DNA replication
Q76ZX2	MVA028	Protein K7	2	P68466	K7	VACWR039_Protein K7	1	0.993	bi (<->)	149	Host interaction
Q76RD2	MVA080	Protein L1	3	P07612	L1	VACWR088_Protein L1	0.996	0.996	bi (<->)	250	Virion association
Q6J3E8	ACAM3000_MVA_082	Uncharacterized protein	3	P07614	L3	VACWR090_Protein L3	0.991	0.997	bi (<->)	350	Transcription
Q76RD0	MVA083	25 kDa major core protein	3	P03295	L4	VACWR091_Core protein VP8	0.992	0.996	bi (<->)	251	Transcription
O57171	MVA020	Fragment of 14k virulence factor	1	P17361	N1	VACWR028_Protein N1	0.892	0.863	bi (<->)	117	Host interaction
O93116	MVA021	Alpha-amanitin sensitive protein	1	P14357	N2	VACWR029_Protein N2	0.949	0.994	bi (<->)	175	Host interaction
Q6J3H0	ACAM3000_MVA_059	Uncharacterized protein	1	Q80HX1	O1	VACWR068_Protein O1	0.995	0.599	bi (<->)	666	Host interaction
Q76ZV3	MVA061	Glutaredoxin-1	4	P68692	O2	VACWR069_Glutaredoxin-1	1	0.991	bi (<->)	108	Unknown
O57169	MVA008	Interleukin-18-binding protein	2	P17357	VACWR013	VACWR013_Interleukin-18-binding protein	0.794	0.992	bi (<->)	126	Host interaction
A9J0Z1	MVA156	Putative 8.8k protein	2	Q80HU0	VACWR169	VACWR169_Protein 169	1	0.987	bi (<->)	78	Host interaction
Q6J3I9	ACAM3000_MVA_040	Uncharacterized protein	1
